# Supplementary material for: Activation of the DR3-TL1A Axis in Donor Mice Leads to Regulatory T Cell Expansion and Activation With Reduction in Graft-Versus-Host Disease
Source: Front Immunol. 2019 Jul 17;10:1624. doi: 10.3389/fimmu.2019.01624 (PMC6652149; doi:10.3389/fimmu.2019.01624)
Supplement: Supplementary file 2 [file Table_2.xlsx]

## Sheet: Upreg 4C12vIso-Molec
Supplemental Table 2. GO Molecular Function Analysis of upregulated genes in 4C12 versus Isotype Control treated Treg. 249 upregulated genes (adjusted p<0.05 and fold increase >1.5) were analyzed using the Enrichr analysis tool [27,28].
Term	Overlap	P-value	Adjusted P-value	Old P-value	Old Adjusted P-value	Z-score	Combined Score	Genes
C-C chemokine binding (GO:0019957)	3/9	0.000149733	0.0104813	0.000294615	0.0206231	-3.4056	29.992	CCR1;CCR5;CCR3
cytokine receptor activity (GO:0004896)	9/74	3.28509e-07	9.19826e-05	3.9515e-07	0.000110642	-1.83766	27.4339	CCR1;IL1RL1;IL1R1;IL1R2;CCR5;CCR3;IL9R;IL17RB;CCR2
G-protein coupled chemoattractant receptor activity (GO:0001637)	4/16	3.73518e-05	0.00522926	6.75884e-05	0.00946238	-2.56867	26.1879	CCR1;CCR5;CCR3;CCR2
chemokine receptor activity (GO:0004950)	4/22	0.00014159	0.0104813	0.000197798	0.0184611	-2.19243	19.4306	CCR1;CCR5;CCR3;CCR2
protein binding involved in cell-matrix adhesion (GO:0098634)	2/8	0.00408192	0.0952448	0.00545574	0.112779	-3.26171	17.9433	ITGA11;MADCAM1
chemokine binding (GO:0019956)	3/18	0.00133924	0.0749976	0.00165245	0.092537	-2.16641	14.3322	CCR1;CCR5;CCR3
L-proline transmembrane transporter activity (GO:0015193)	2/8	0.00408192	0.0952448	0.00545574	0.112779	-2.5147	13.8338	SLC36A3;SLC1A4
L-alanine transmembrane transporter activity (GO:0015180)	2/8	0.00408192	0.0952448	0.00545574	0.112779	-2.47647	13.6235	SLC36A3;SLC1A4
alanine transmembrane transporter activity (GO:0022858)	2/8	0.00408192	0.0952448	0.00545574	0.112779	-2.46321	13.5506	SLC36A3;SLC1A4
voltage-gated ion channel activity involved in regulation of postsynaptic membrane potential (GO:1905030)	3/24	0.00314466	0.0952448	0.00345765	0.112779	-2.11214	12.1702	CACNA1I;SCN4B;CACNA1G
voltage-gated sodium channel activity (GO:0005248)	3/24	0.00314466	0.0952448	0.00345765	0.112779	-2.08978	12.0414	CACNA1I;SCN4B;CACNA1G
phosphatidylinositol phospholipase C activity (GO:0004435)	3/25	0.00354106	0.0952448	0.00384063	0.112779	-1.97186	11.1279	CCR1;CCR5;PLCD1
cytochrome-b5 reductase activity, acting on NAD(P)H (GO:0004128)	1/7	0.083649	0.432753	0.0875808	0.412006	-4.45682	11.0579	NQO1
RNA polymerase I core binding (GO:0001042)	1/7	0.083649	0.432753	0.0875808	0.412006	-4.20754	10.4394	ERBB2
tropomyosin binding (GO:0005523)	2/15	0.0144574	0.202403	0.0156525	0.2087	-2.3435	9.92835	NEBL;S100A6
protein serine/threonine/tyrosine kinase activity (GO:0004712)	2/15	0.0144574	0.202403	0.0156525	0.2087	-2.30603	9.76963	PRKCG;AURKB
C3HC4-type RING finger domain binding (GO:0055131)	1/7	0.083649	0.432753	0.0875808	0.412006	-3.83669	9.51932	HSPA1A
cysteinyl leukotriene receptor activity (GO:0001631)	1/7	0.083649	0.432753	0.0875808	0.412006	-3.69965	9.17928	CYSLTR1
cAMP binding (GO:0030552)	2/13	0.010916	0.19103	0.0122652	0.202015	-2.02929	9.16738	POPDC2;PDE4A
leukotriene receptor activity (GO:0004974)	1/7	0.083649	0.432753	0.0875808	0.412006	-3.68746	9.14906	CYSLTR1
solute:proton symporter activity (GO:0015295)	2/22	0.0300528	0.350616	0.0301649	0.296492	-2.49189	8.73357	SLC36A3;SLC2A6
MAP kinase kinase kinase activity (GO:0004709)	4/79	0.0167963	0.22395	0.0147795	0.2087	-2.08945	8.53873	LTK;ERBB2;MAP3K20;EPHA3
phospholipase C activity (GO:0004629)	3/28	0.00490779	0.105706	0.00514055	0.112779	-1.58312	8.41735	CCR1;CCR5;PLCD1
primary amine oxidase activity (GO:0008131)	1/7	0.083649	0.432753	0.0875808	0.412006	-3.26241	8.09445	AOC1
sodium channel activity (GO:0005272)	3/41	0.0141956	0.202403	0.0136079	0.2087	-1.76827	7.52366	CACNA1I;SCN4B;CACNA1G
LBD domain binding (GO:0050693)	1/7	0.083649	0.432753	0.0875808	0.412006	-2.89242	7.17644	PROX1
neutral amino acid transmembrane transporter activity (GO:0015175)	2/25	0.0380973	0.376883	0.0375251	0.341537	-2.17047	7.09224	SLC36A3;SLC1A4
histone serine kinase activity (GO:0035174)	1/8	0.0950158	0.432753	0.0979787	0.412006	-3.01094	7.08688	AURKB
integrin binding (GO:0005178)	5/95	0.00660115	0.132023	0.00563893	0.112779	-1.40361	7.04681	ESM1;ADAM11;MADCAM1;EMP2;NPNT
actin binding (GO:0003779)	7/255	0.0402541	0.376883	0.0301669	0.296492	-2.17095	6.97428	SCIN;ABLIM3;NEBL;COBL;CCR5;OBSL1;SHROOM4
aldehyde dehydrogenase [NAD(P)+] activity (GO:0004030)	1/7	0.083649	0.432753	0.0875808	0.412006	-2.72151	6.7524	ALDH1A3
cation:sugar symporter activity (GO:0005402)	1/8	0.0950158	0.432753	0.0979787	0.412006	-2.86265	6.73784	SLC2A6
MAP kinase tyrosine/serine/threonine phosphatase activity (GO:0017017)	1/8	0.0950158	0.432753	0.0979787	0.412006	-2.84151	6.68809	DUSP9
alpha-(1->3)-fucosyltransferase activity (GO:0046920)	1/9	0.106242	0.432753	0.108259	0.412006	-2.96676	6.65157	FUT7
cyclic nucleotide binding (GO:0030551)	2/22	0.0300528	0.350616	0.0301649	0.296492	-1.86429	6.53397	POPDC2;PDE4A
protein homodimerization activity (GO:0042803)	14/665	0.038332	0.376883	0.0224024	0.272725	-1.96778	6.41787	TOP2A;CUBN;AOC1;CIB2;ALDH1A3;CENPF;KYNU;S100A6;CHMP4C;RBPMS2;NBL1;DSCAML1;KLRG1;CCR2
actin filament binding (GO:0051015)	5/128	0.0217642	0.276999	0.0179179	0.228046	-1.66284	6.3645	SCIN;ABLIM3;NEBL;OBSL1;SHROOM4
cation:amino acid symporter activity (GO:0005416)	1/7	0.083649	0.432753	0.0875808	0.412006	-2.54914	6.32473	SLC36A3
glycine transmembrane transporter activity (GO:0015187)	1/8	0.0950158	0.432753	0.0979787	0.412006	-2.66463	6.27178	SLC36A3
type II transforming growth factor beta receptor binding (GO:0005114)	1/8	0.0950158	0.432753	0.0979787	0.412006	-2.59488	6.10761	TGFB3
histone kinase activity (GO:0035173)	1/10	0.11733	0.432753	0.118423	0.412006	-2.81144	6.02427	AURKB
phosphatidylinositol 3-kinase regulatory subunit binding (GO:0036312)	1/8	0.0950158	0.432753	0.0979787	0.412006	-2.55506	6.01387	FBXL2
retinal dehydrogenase activity (GO:0001758)	1/8	0.0950158	0.432753	0.0979787	0.412006	-2.51902	5.92905	ALDH1A3
type I transforming growth factor beta receptor binding (GO:0034713)	1/9	0.106242	0.432753	0.108259	0.412006	-2.6429	5.92548	TGFB3
interleukin-17 receptor activity (GO:0030368)	1/8	0.0950158	0.432753	0.0979787	0.412006	-2.48375	5.84602	IL17RB
RAGE receptor binding (GO:0050786)	1/10	0.11733	0.432753	0.118423	0.412006	-2.72138	5.83129	S100A4
cytoskeletal adaptor activity (GO:0008093)	1/10	0.11733	0.432753	0.118423	0.412006	-2.60699	5.58618	OBSL1
protein tyrosine kinase activity (GO:0004713)	6/148	0.0104702	0.19103	0.00828912	0.14506	-1.1825	5.39128	BLK;FGF16;LTK;SRMS;ERBB2;EPHA3
D-glucose transmembrane transporter activity (GO:0055056)	1/10	0.11733	0.432753	0.118423	0.412006	-2.4811	5.31642	SLC2A6
protein kinase C activity (GO:0004697)	1/11	0.12828	0.432753	0.128472	0.412006	-2.58009	5.29831	PRKCG
superoxide-generating NADPH oxidase activator activity (GO:0016176)	1/10	0.11733	0.432753	0.118423	0.412006	-2.43886	5.22591	SH3PXD2B
3-chloroallyl aldehyde dehydrogenase activity (GO:0004028)	1/9	0.106242	0.432753	0.108259	0.412006	-2.30499	5.16787	ALDH1A3
bubble DNA binding (GO:0000405)	1/8	0.0950158	0.432753	0.0979787	0.412006	-2.19143	5.158	NEIL3
GDP-dissociation inhibitor activity (GO:0005092)	1/9	0.106242	0.432753	0.108259	0.412006	-2.29365	5.14244	SH3BP4
hydrolase activity, acting on carbon-nitrogen (but not peptide) bonds, in linear amidines (GO:0016813)	1/11	0.12828	0.432753	0.128472	0.412006	-2.49274	5.11894	PADI2
kinesin binding (GO:0019894)	2/29	0.049929	0.41118	0.0482768	0.397574	-1.70566	5.11213	KIF18B;MAPK8IP1
oxidoreductase activity, acting on a sulfur group of donors, disulfide as acceptor (GO:0016671)	1/11	0.12828	0.432753	0.128472	0.412006	-2.43142	4.99301	MSRB3
hydrogen:amino acid symporter activity (GO:0005280)	1/7	0.083649	0.432753	0.0875808	0.412006	-1.97774	4.90703	SLC36A3
transmembrane receptor protein tyrosine kinase activity (GO:0004714)	3/62	0.0417263	0.376883	0.0378131	0.341537	-1.51867	4.82424	LTK;ERBB2;EPHA3
filamin binding (GO:0031005)	1/11	0.12828	0.432753	0.128472	0.412006	-2.3217	4.7677	NEBL
MAP kinase phosphatase activity (GO:0033549)	1/10	0.11733	0.432753	0.118423	0.412006	-2.22352	4.76448	DUSP9
calcium-dependent protein serine/threonine kinase activity (GO:0009931)	1/12	0.139096	0.433434	0.138408	0.412006	-2.37176	4.67852	PRKCG
BMP binding (GO:0036122)	1/10	0.11733	0.432753	0.118423	0.412006	-2.17446	4.65937	NBL1
platelet-derived growth factor receptor binding (GO:0005161)	1/14	0.160327	0.433434	0.157942	0.412006	-2.51513	4.60405	IL1R1
protein kinase activity (GO:0004672)	13/514	0.0122193	0.201259	0.00701898	0.131021	-1.04339	4.59587	BLK;PRKCG;LTK;SRMS;AURKB;CCNA2;FGF16;ERBB2;PBK;MAP3K20;NEK2;BUB1;EPHA3
cyclin-dependent protein kinase activity (GO:0097472)	2/35	0.0697486	0.432753	0.0661848	0.412006	-1.72513	4.59377	CCNA2;CCNB2
BMP receptor binding (GO:0070700)	1/13	0.149777	0.433434	0.148231	0.412006	-2.36187	4.48427	TGFB3
galanin receptor activity (GO:0004966)	1/12	0.139096	0.433434	0.138408	0.412006	-2.26226	4.46252	CYSLTR1
phosphatidylinositol-5-phosphate binding (GO:0010314)	1/11	0.12828	0.432753	0.128472	0.412006	-2.15034	4.41581	SH3PXD2B
hexose transmembrane transporter activity (GO:0015149)	1/14	0.160327	0.433434	0.157942	0.412006	-2.4055	4.40337	SLC2A6
voltage-gated calcium channel activity (GO:0005245)	2/38	0.0804676	0.432753	0.0758436	0.412006	-1.747	4.40228	CACNA1I;CACNA1G
cyclin-dependent protein serine/threonine kinase inhibitor activity (GO:0004861)	1/11	0.12828	0.432753	0.128472	0.412006	-2.11948	4.35244	CDKN2A
microtubule plus-end binding (GO:0051010)	1/13	0.149777	0.433434	0.148231	0.412006	-2.23272	4.23905	KIF2C
oxidoreductase activity, acting on NAD(P)H, heme protein as acceptor (GO:0016653)	1/14	0.160327	0.433434	0.157942	0.412006	-2.24774	4.11458	NQO1
transmembrane receptor protein kinase activity (GO:0019199)	3/63	0.0434247	0.379966	0.0392938	0.343821	-1.30507	4.09366	LTK;ERBB2;EPHA3
oxidoreductase activity, acting on the CH-NH2 group of donors, oxygen as acceptor (GO:0016641)	1/16	0.181036	0.433434	0.177037	0.412006	-2.36038	4.03402	AOC1
3',5'-cyclic-AMP phosphodiesterase activity (GO:0004115)	1/16	0.181036	0.433434	0.177037	0.412006	-2.34601	4.00946	PDE4A
fucosyltransferase activity (GO:0008417)	1/14	0.160327	0.433434	0.157942	0.412006	-2.17769	3.98636	FUT7
DNA N-glycosylase activity (GO:0019104)	1/11	0.12828	0.432753	0.128472	0.412006	-1.91525	3.93303	NEIL3
cation transmembrane transporter activity (GO:0008324)	4/98	0.0337314	0.376883	0.0290193	0.296492	-1.15249	3.90617	CACNA1I;SLC36A3;SLC1A4;CACNA1G
protein kinase C binding (GO:0005080)	2/41	0.091656	0.432753	0.0859171	0.412006	-1.6085	3.84384	TOP2A;ADCY4
aldehyde dehydrogenase (NAD) activity (GO:0004029)	1/15	0.170746	0.433434	0.167544	0.412006	-2.16214	3.82175	ALDH1A3
water transmembrane transporter activity (GO:0005372)	1/14	0.160327	0.433434	0.157942	0.412006	-2.05124	3.75487	AQP4
neuropeptide receptor activity (GO:0008188)	2/36	0.0732663	0.432753	0.0693558	0.412006	-1.43364	3.74704	CYSLTR1;NMUR1
sugar:proton symporter activity (GO:0005351)	1/11	0.12828	0.432753	0.128472	0.412006	-1.82282	3.74324	SLC2A6
water channel activity (GO:0015250)	1/14	0.160327	0.433434	0.157942	0.412006	-2.01132	3.68181	AQP4
ephrin receptor activity (GO:0005003)	1/18	0.201237	0.433434	0.195703	0.412006	-2.27126	3.64144	EPHA3
mitogen-activated protein kinase kinase binding (GO:0031434)	3/66	0.0487239	0.41118	0.0439106	0.372575	-1.18015	3.56593	LTK;ERBB2;EPHA3
transferase activity, transferring amino-acyl groups (GO:0016755)	1/17	0.1912	0.433434	0.186423	0.412006	-2.14965	3.55646	CHAC1
nucleoside kinase activity (GO:0019206)	1/15	0.170746	0.433434	0.167544	0.412006	-1.98017	3.50011	TK1
1-phosphatidylinositol binding (GO:0005545)	1/15	0.170746	0.433434	0.167544	0.412006	-1.97791	3.49611	SCIN
non-membrane spanning protein tyrosine kinase activity (GO:0004715)	2/44	0.103265	0.432753	0.0963669	0.412006	-1.52581	3.46428	BLK;SRMS
transmembrane-ephrin receptor activity (GO:0005005)	1/18	0.201237	0.433434	0.195703	0.412006	-2.12818	3.41204	EPHA3
oxidoreductase activity, acting on NAD(P)H, quinone or similar compound as acceptor (GO:0016655)	1/16	0.181036	0.433434	0.177037	0.412006	-1.99385	3.4076	NQO1
muscle alpha-actinin binding (GO:0051371)	1/17	0.1912	0.433434	0.186423	0.412006	-2.04382	3.38137	OBSL1
microtubule binding (GO:0008017)	6/196	0.0357633	0.376883	0.0279188	0.296492	-1.00767	3.35637	PSRC1;KIF18B;SPAG5;NUSAP1;BIRC5;KIF2C
ligand-dependent nuclear receptor binding (GO:0016922)	1/18	0.201237	0.433434	0.195703	0.412006	-1.99873	3.2045	PROX1
lipoprotein particle receptor activity (GO:0030228)	1/16	0.181036	0.433434	0.177037	0.412006	-1.86972	3.19546	STAB1
tubulin binding (GO:0015631)	7/256	0.0409682	0.376883	0.0307081	0.296492	-0.991823	3.16883	TPPP3;PSRC1;KIF18B;SPAG5;NUSAP1;BIRC5;KIF2C
aspartic-type peptidase activity (GO:0070001)	1/18	0.201237	0.433434	0.195703	0.412006	-1.96765	3.15467	BACE2
GTP-Rho binding (GO:0017049)	1/18	0.201237	0.433434	0.195703	0.412006	-1.94914	3.125	RTKN2
hydrolase activity, hydrolyzing N-glycosyl compounds (GO:0016799)	1/15	0.170746	0.433434	0.167544	0.412006	-1.75292	3.09842	NEIL3
monovalent inorganic cation transmembrane transporter activity (GO:0015077)	1/18	0.201237	0.433434	0.195703	0.412006	-1.91656	3.07276	SLC36A3
protein disulfide oxidoreductase activity (GO:0015035)	1/16	0.181036	0.433434	0.177037	0.412006	-1.74793	2.98731	STAB1
G-protein beta/gamma-subunit complex binding (GO:0031683)	1/18	0.201237	0.433434	0.195703	0.412006	-1.85504	2.97412	GNA15
Notch binding (GO:0005112)	1/18	0.201237	0.433434	0.195703	0.412006	-1.8486	2.9638	CHAC1
low-density lipoprotein particle binding (GO:0030169)	1/18	0.201237	0.433434	0.195703	0.412006	-1.83615	2.94385	STAB1
low-density lipoprotein receptor activity (GO:0005041)	1/14	0.160327	0.433434	0.157942	0.412006	-1.60229	2.93306	STAB1
FAD binding (GO:0071949)	1/20	0.220942	0.444557	0.213948	0.418919	-1.93453	2.92086	AOC1
DNA-(apurinic or apyrimidinic site) lyase activity (GO:0003906)	1/13	0.149777	0.433434	0.148231	0.412006	-1.50749	2.86214	NEIL3
amino acid transmembrane transporter activity (GO:0015171)	2/57	0.157373	0.433434	0.145147	0.412006	-1.53851	2.84491	SLC36A3;SLC1A4
protein phosphatase binding (GO:0019903)	3/93	0.10899	0.432753	0.0964202	0.412006	-1.27924	2.83544	ERBB2;NEK2;FBXL2
3',5'-cyclic-nucleotide phosphodiesterase activity (GO:0004114)	1/21	0.230612	0.444557	0.222916	0.424177	-1.8844	2.76446	PDE4A
glucose transmembrane transporter activity (GO:0005355)	1/21	0.230612	0.444557	0.222916	0.424177	-1.86546	2.73667	SLC2A6
L-amino acid transmembrane transporter activity (GO:0015179)	2/50	0.127566	0.432753	0.118251	0.412006	-1.32894	2.73646	SLC36A3;SLC1A4
phosphatidylinositol bisphosphate binding (GO:1902936)	3/88	0.0962724	0.432753	0.0853148	0.412006	-1.16147	2.7185	SCIN;SH3PXD2B;PLCD1
DNA binding, bending (GO:0008301)	1/18	0.201237	0.433434	0.195703	0.412006	-1.67599	2.68707	TOP2A
phosphatidylinositol-4,5-bisphosphate binding (GO:0005546)	2/61	0.174941	0.433434	0.161038	0.412006	-1.53869	2.68241	SCIN;PLCD1
K63-linked polyubiquitin modification-dependent protein binding (GO:0070530)	1/21	0.230612	0.444557	0.222916	0.424177	-1.79848	2.6384	OPTN
immunoglobulin binding (GO:0019865)	1/12	0.139096	0.433434	0.138408	0.412006	-1.32989	2.62334	LGALS3
hyaluronic acid binding (GO:0005540)	1/19	0.211151	0.443643	0.204877	0.418919	-1.68574	2.62163	HMMR
transforming growth factor beta binding (GO:0050431)	1/20	0.220942	0.444557	0.213948	0.418919	-1.68763	2.54808	TGFB3
neuropeptide binding (GO:0042923)	1/20	0.220942	0.444557	0.213948	0.418919	-1.68323	2.54143	NMUR1
Ran GTPase binding (GO:0008536)	1/19	0.211151	0.443643	0.204877	0.418919	-1.6255	2.52795	BIRC5
receptor antagonist activity (GO:0048019)	1/18	0.201237	0.433434	0.195703	0.412006	-1.56415	2.50775	DKK3
aspartic-type endopeptidase activity (GO:0004190)	1/22	0.240162	0.445334	0.231782	0.424177	-1.68767	2.40736	BACE2
ubiquitin conjugating enzyme activity (GO:0061631)	1/21	0.230612	0.444557	0.222916	0.424177	-1.63214	2.39438	UBE2C
zinc ion binding (GO:0008270)	7/303	0.0840977	0.432753	0.0639125	0.412006	-0.964442	2.38774	AOC1;AIRE;GDA;ZBTB32;MSRB3;ADAM8;TK1
dynein complex binding (GO:0070840)	1/20	0.220942	0.444557	0.213948	0.418919	-1.5549	2.34767	CENPF
phosphatidylinositol-3,5-bisphosphate binding (GO:0080025)	1/22	0.240162	0.445334	0.231782	0.424177	-1.61115	2.29821	SH3PXD2B
metallopeptidase activity (GO:0008237)	3/103	0.136204	0.433434	0.120263	0.412006	-1.15008	2.29281	ADAM12;ADAM11;ADAM8
protein kinase binding (GO:0019901)	10/496	0.0907016	0.432753	0.0630679	0.412006	-0.953659	2.28895	CCNA2;TOP2A;LTK;CDKN2A;ERBB2;ADCY4;EMP2;RHOV;CDC25C;EPHA3
disordered domain specific binding (GO:0097718)	1/24	0.258911	0.461751	0.249215	0.430933	-1.69367	2.28861	HSPA1A
microtubule motor activity (GO:0003777)	2/61	0.174941	0.433434	0.161038	0.412006	-1.30956	2.28296	KIF18B;KIF2C
transcriptional repressor activity, RNA polymerase II core promoter proximal region sequence-specific binding (GO:0001078)	3/98	0.122317	0.432753	0.108082	0.412006	-1.0632	2.23394	TSHZ2;SNAI2;PROX1
collagen binding (GO:0005518)	2/53	0.140174	0.433434	0.129619	0.412006	-1.13693	2.23393	ITGA11;NID2
SH3 domain binding (GO:0017124)	2/56	0.153036	0.433434	0.141228	0.412006	-1.17574	2.20697	CNTNAP1;ADAM12
lipoprotein particle binding (GO:0071813)	1/24	0.258911	0.461751	0.249215	0.430933	-1.60717	2.17173	STAB1
scavenger receptor activity (GO:0005044)	1/22	0.240162	0.445334	0.231782	0.424177	-1.51271	2.15779	STAB1
spectrin binding (GO:0030507)	1/20	0.220942	0.444557	0.213948	0.418919	-1.40016	2.11404	ANK3
ubiquitin-like protein conjugating enzyme activity (GO:0061650)	1/22	0.240162	0.445334	0.231782	0.424177	-1.48132	2.11302	UBE2C
calcium activated cation channel activity (GO:0005227)	1/24	0.258911	0.461751	0.249215	0.430933	-1.55494	2.10115	TMEM63C
small GTPase binding (GO:0031267)	2/64	0.188313	0.433434	0.173156	0.412006	-1.25348	2.09288	SH3BP4;RNF152
transmembrane receptor protein serine/threonine kinase binding (GO:0070696)	1/17	0.1912	0.433434	0.186423	0.412006	-1.23164	2.03768	TGFB3
oxidoreductase activity, acting on single donors with incorporation of molecular oxygen, incorporation of two atoms of oxygen (GO:0016702)	1/22	0.240162	0.445334	0.231782	0.424177	-1.42697	2.03548	BCO2
ion gated channel activity (GO:0022839)	1/26	0.277198	0.464763	0.266255	0.430933	-1.54822	1.98641	TMEM63C
N-acetyltransferase activity (GO:0008080)	1/23	0.249595	0.453809	0.240548	0.430933	-1.40282	1.947	ESCO2
oxidoreductase activity, acting on the aldehyde or oxo group of donors, NAD or NADP as acceptor (GO:0016620)	1/26	0.277198	0.464763	0.266255	0.430933	-1.51034	1.9378	ALDH1A3
acetyltransferase activity (GO:0016407)	1/25	0.268111	0.463402	0.257783	0.430933	-1.46646	1.93038	ESCO2
peptidase activity, acting on L-amino acid peptides (GO:0070011)	4/186	0.200391	0.433434	0.171261	0.412006	-1.19419	1.91965	ADAM12;ADAM11;GZMB;ADAM8
G-protein coupled peptide receptor activity (GO:0008528)	2/65	0.192801	0.433434	0.177228	0.412006	-1.15362	1.89897	CYSLTR1;NMUR1
phosphatidylinositol-4-phosphate binding (GO:0070273)	1/23	0.249595	0.453809	0.240548	0.430933	-1.35565	1.88153	SH3PXD2B
carboxylic acid transmembrane transporter activity (GO:0046943)	2/65	0.192801	0.433434	0.177228	0.412006	-1.13898	1.87487	SLC36A3;SLC1A4
phosphatase binding (GO:0019902)	3/103	0.136204	0.433434	0.120263	0.412006	-0.937213	1.86843	ERBB2;NEK2;FBXL2
SH2 domain binding (GO:0042169)	1/27	0.286172	0.467489	0.27463	0.436912	-1.45397	1.81915	SH3PXD2B
carboxy-lyase activity (GO:0016831)	1/27	0.286172	0.467489	0.27463	0.436912	-1.39214	1.74179	GAD1
substrate-specific channel activity (GO:0022838)	1/28	0.295036	0.472057	0.282911	0.444184	-1.42627	1.74099	AQP4
DNA secondary structure binding (GO:0000217)	1/25	0.268111	0.463402	0.257783	0.430933	-1.3087	1.72272	NEIL3
phosphatidylinositol-4,5-bisphosphate 3-kinase activity (GO:0046934)	2/69	0.210884	0.443643	0.193659	0.412006	-1.08088	1.68232	FGF16;ERBB2
alpha-actinin binding (GO:0051393)	1/30	0.312435	0.48601	0.299192	0.455292	-1.44428	1.68022	OBSL1
NF-kappaB binding (GO:0051059)	1/25	0.268111	0.463402	0.257783	0.430933	-1.25268	1.64897	CDKN2A
cyclin-dependent protein serine/threonine kinase regulator activity (GO:0016538)	1/28	0.295036	0.472057	0.282911	0.444184	-1.33391	1.62825	CDKN2A
disulfide oxidoreductase activity (GO:0015036)	1/25	0.268111	0.463402	0.257783	0.430933	-1.2355	1.62635	STAB1
N-acyltransferase activity (GO:0016410)	1/26	0.277198	0.464763	0.266255	0.430933	-1.25176	1.60604	ESCO2
nucleobase-containing compound kinase activity (GO:0019205)	1/31	0.320974	0.488438	0.307194	0.45997	-1.37697	1.56479	TK1
magnesium ion binding (GO:0000287)	3/128	0.212315	0.443643	0.187629	0.412006	-0.994287	1.54083	TOP2A;MAP3K20;CIB2
actin monomer binding (GO:0003785)	1/26	0.277198	0.464763	0.266255	0.430933	-1.19519	1.53346	COBL
G-protein coupled receptor binding (GO:0001664)	3/134	0.231805	0.444557	0.20506	0.418919	-1.00309	1.46638	WNT10B;GNA15;HSPA1A
WW domain binding (GO:0050699)	1/30	0.312435	0.48601	0.299192	0.455292	-1.21499	1.41347	CDC25C
protein serine/threonine kinase inhibitor activity (GO:0030291)	1/31	0.320974	0.488438	0.307194	0.45997	-1.18405	1.34555	CDKN2A
phosphatidylinositol bisphosphate kinase activity (GO:0052813)	2/72	0.224554	0.444557	0.206109	0.418919	-0.900259	1.34466	FGF16;ERBB2
phosphatidylinositol-3-phosphate binding (GO:0032266)	1/32	0.329407	0.488816	0.315106	0.466823	-1.19123	1.32282	SH3PXD2B
phosphatidylinositol 3-kinase activity (GO:0035004)	2/77	0.247468	0.453809	0.227037	0.424177	-0.918132	1.28215	FGF16;ERBB2
estrogen receptor binding (GO:0030331)	1/33	0.337735	0.497715	0.322928	0.475893	-1.13344	1.23035	PADI2
RNA polymerase II transcription corepressor activity (GO:0001106)	1/27	0.286172	0.467489	0.27463	0.436912	-0.968772	1.21209	HSPA1A
cyclin-dependent protein serine/threonine kinase activity (GO:0004693)	1/34	0.345961	0.507168	0.330661	0.479715	-1.14027	1.21032	CCNB2
carboxylic acid binding (GO:0031406)	1/35	0.354085	0.510005	0.338307	0.483295	-1.12064	1.16347	HMMR
motor activity (GO:0003774)	2/86	0.288842	0.467489	0.26502	0.430933	-0.922065	1.14509	KIF18B;KIF2C
ATP-dependent microtubule motor activity, plus-end-directed (GO:0008574)	1/32	0.329407	0.488816	0.315106	0.466823	-1.00393	1.11482	KIF18B
frizzled binding (GO:0005109)	1/38	0.377858	0.534345	0.360727	0.504164	-1.13465	1.10429	WNT10B
copper ion binding (GO:0005507)	1/42	0.408206	0.563043	0.389453	0.529353	-1.19848	1.07381	AOC1
RNA polymerase core enzyme binding (GO:0043175)	1/35	0.354085	0.510005	0.338307	0.483295	-0.997152	1.03526	ERBB2
growth factor receptor binding (GO:0070851)	2/93	0.320861	0.488438	0.294603	0.455292	-0.906127	1.03004	ESM1;IL1R1
histone deacetylase binding (GO:0042826)	2/86	0.288842	0.467489	0.26502	0.430933	-0.827057	1.0271	TOP2A;HSPA1A
cation channel activity (GO:0005261)	3/147	0.275	0.464763	0.243972	0.430933	-0.774594	0.999989	CACNA1I;TMEM63C;CACNA1G
protein tyrosine/serine/threonine phosphatase activity (GO:0008138)	1/35	0.354085	0.510005	0.338307	0.483295	-0.92445	0.959782	DUSP9
ATPase activity, coupled (GO:0042623)	2/95	0.329951	0.488816	0.303032	0.458643	-0.840575	0.93204	TOP2A;HSPA1A
transition metal ion binding (GO:0046914)	7/400	0.229486	0.444557	0.182241	0.412006	-0.62746	0.923566	AOC1;AIRE;GDA;ZBTB32;MSRB3;ADAM8;TK1
calcium channel activity (GO:0005262)	2/94	0.32541	0.488816	0.298819	0.455292	-0.814646	0.91458	CACNA1I;CACNA1G
pyrophosphatase activity (GO:0016462)	1/42	0.408206	0.563043	0.389453	0.529353	-0.995661	0.892095	PRUNE2
calcium ion binding (GO:0005509)	5/285	0.279773	0.466289	0.235479	0.428144	-0.672032	0.856017	AOC1;SCIN;S100A6;CIB2;ADAM8
CCR chemokine receptor binding (GO:0048020)	1/39	0.385588	0.542536	0.368032	0.507533	-0.84381	0.80414	CCR2
hydrogen ion transmembrane transporter activity (GO:0015078)	1/52	0.477779	0.597224	0.455784	0.56973	-1.08687	0.802769	SLC36A3
transcriptional repressor activity, RNA polymerase II transcription regulatory region sequence-specific binding (GO:0001227)	3/160	0.31893	0.488438	0.28396	0.444184	-0.684416	0.78214	TSHZ2;SNAI2;PROX1
voltage-gated cation channel activity (GO:0022843)	2/101	0.357004	0.510005	0.328204	0.478631	-0.755075	0.777734	CACNA1I;CACNA1G
phosphatidylinositol binding (GO:0035091)	2/101	0.357004	0.510005	0.328204	0.478631	-0.744686	0.767033	SCIN;SH3PXD2B
transcriptional repressor activity, RNA polymerase II transcription factor binding (GO:0001191)	1/48	0.450985	0.592174	0.430156	0.55504	-0.961689	0.765812	HSPA1A
1-phosphatidylinositol-3-kinase activity (GO:0016303)	1/44	0.422823	0.571934	0.403331	0.539168	-0.886478	0.763082	FGF16
ubiquitin-protein transferase activity (GO:0004842)	7/418	0.262949	0.463402	0.210728	0.418919	-0.570284	0.761783	UBE2C;FBXO27;BIRC5;LMO7;FBXL2;RNF152;FBXO44
ion channel activity (GO:0005216)	2/94	0.32541	0.488816	0.298819	0.455292	-0.667885	0.749815	CACNA1I;CACNA1G
protein phosphatase regulator activity (GO:0019888)	1/48	0.450985	0.592174	0.430156	0.55504	-0.937315	0.746403	PPP4R4
protein serine/threonine kinase activity (GO:0004674)	6/369	0.308863	0.48601	0.255704	0.430933	-0.623208	0.73218	PRKCG;CCNB2;PBK;MAP3K20;NEK2;AURKB
regulatory region DNA binding (GO:0000975)	4/225	0.305259	0.485639	0.264328	0.430933	-0.611596	0.725717	AIRE;PROX1;GLIS2;TEAD3
flavin adenine dinucleotide binding (GO:0050660)	1/49	0.45781	0.592174	0.436673	0.558304	-0.928083	0.725113	AOC1
amyloid-beta binding (GO:0001540)	1/50	0.464549	0.592174	0.443116	0.563966	-0.927282	0.710936	BACE2
ATP-dependent microtubule motor activity (GO:1990939)	1/49	0.45781	0.592174	0.436673	0.558304	-0.859276	0.671354	KIF18B
metal ion binding (GO:0046872)	7/443	0.311466	0.48601	0.252826	0.430933	-0.532727	0.621408	TOP2A;AOC1;SCIN;S100A6;MAP3K20;CIB2;ADAM8
phosphatase activity (GO:0016791)	2/105	0.374822	0.532742	0.344856	0.487675	-0.612699	0.601244	CDC25C;DUSP9
polyubiquitin modification-dependent protein binding (GO:0031593)	1/44	0.422823	0.571934	0.403331	0.539168	-0.692729	0.596303	OPTN
transforming growth factor beta receptor binding (GO:0005160)	1/45	0.429995	0.57884	0.410153	0.539168	-0.701256	0.591846	TGFB3
SH3/SH2 adaptor activity (GO:0005070)	1/52	0.477779	0.597224	0.455784	0.56973	-0.729704	0.538964	CNTNAP1
cysteine-type endopeptidase inhibitor activity (GO:0004869)	1/52	0.477779	0.597224	0.455784	0.56973	-0.727455	0.537303	BIRC5
serine-type endopeptidase activity (GO:0004252)	3/197	0.442704	0.590272	0.399058	0.539168	-0.642847	0.523827	GZMB;ADAM8;TMPRSS13
phosphotransferase activity, alcohol group as acceptor (GO:0016773)	4/255	0.389448	0.545227	0.341227	0.484993	-0.539939	0.509176	PRKCG;LTK;NEK2;BUB1
chloride transmembrane transporter activity (GO:0015108)	1/57	0.509447	0.628393	0.486215	0.594499	-0.658965	0.444425	SLC1A4
anion channel activity (GO:0005253)	1/67	0.567159	0.670061	0.542103	0.640459	-0.776118	0.440149	SLC1A4
protein tyrosine phosphatase activity (GO:0004725)	1/63	0.544934	0.654856	0.520511	0.620183	-0.714679	0.433875	CDC25C
Ras GTPase binding (GO:0017016)	3/185	0.403203	0.561676	0.361918	0.504164	-0.472214	0.428919	SH3BP4;BIRC5;OPTN
kinase inhibitor activity (GO:0019210)	1/60	0.527522	0.642201	0.503657	0.610493	-0.637771	0.407896	MAPK8IP1
phosphatidylinositol kinase activity (GO:0052742)	1/52	0.477779	0.597224	0.455784	0.56973	-0.543885	0.401717	FGF16
ubiquitin binding (GO:0043130)	1/63	0.544934	0.654856	0.520511	0.620183	-0.659593	0.400433	TOP2A
kinase binding (GO:0019900)	6/419	0.418867	0.571934	0.35523	0.499821	-0.457146	0.39781	CCNA2;CDKN2A;EMP2;RHOV;CDC25C;AURKB
steroid hormone receptor binding (GO:0035258)	1/77	0.618105	0.709301	0.591952	0.673766	-0.815453	0.392312	PADI2
DNA-dependent ATPase activity (GO:0008094)	1/73	0.598486	0.695336	0.572694	0.66537	-0.753833	0.386982	TOP2A
chloride channel activity (GO:0005254)	1/62	0.539202	0.653578	0.514957	0.618832	-0.625432	0.386307	SLC1A4
phosphoprotein phosphatase activity (GO:0004721)	2/137	0.508475	0.628393	0.471758	0.584479	-0.566016	0.382819	CDC25C;DUSP9
nucleoside-triphosphatase activity (GO:0017111)	6/425	0.432077	0.57886	0.367489	0.507533	-0.454292	0.381219	GNA15;KIF18B;RAB26;KIF2C;RHOV;HSPA1A
core promoter sequence-specific DNA binding (GO:0001046)	1/74	0.603483	0.698245	0.577591	0.668287	-0.728641	0.367991	PROX1
protein kinase inhibitor activity (GO:0004860)	1/68	0.572544	0.673582	0.547348	0.643939	-0.652175	0.363695	MAPK8IP1
G-protein coupled amine receptor activity (GO:0008227)	1/57	0.509447	0.628393	0.486215	0.594499	-0.519969	0.350682	HRH4
transcription factor activity, RNA polymerase II distal enhancer sequence-specific binding (GO:0003705)	1/65	0.556185	0.659881	0.53143	0.63051	-0.59703	0.35025	PROX1
adenyl ribonucleotide binding (GO:0032559)	4/280	0.458656	0.592174	0.406	0.539168	-0.439317	0.342428	POPDC2;MAP3K20;PDE4A;HSPA1A
transcription corepressor activity (GO:0003714)	3/204	0.465279	0.592174	0.420468	0.547587	-0.447503	0.342392	ZBTB32;PROX1;HSPA1A
kinase activity (GO:0016301)	4/281	0.461377	0.592174	0.408576	0.539168	-0.438775	0.33941	PRKCG;LTK;NEK2;BUB1
ATPase activity (GO:0016887)	3/204	0.465279	0.592174	0.420468	0.547587	-0.426737	0.326504	KIF18B;KIF2C;HSPA1A
GTP binding (GO:0005525)	2/148	0.549981	0.655297	0.511973	0.617898	-0.526703	0.3149	RAB26;RHOV
transcription factor activity, RNA polymerase II core promoter proximal region sequence-specific binding (GO:0000982)	4/281	0.461377	0.592174	0.408576	0.539168	-0.391264	0.302659	TSHZ2;SNAI2;PROX1;GLIS2
GTPase activity (GO:0003924)	3/223	0.524382	0.641166	0.477189	0.588603	-0.431916	0.278817	GNA15;RAB26;RHOV
RNA polymerase II transcription cofactor activity (GO:0001104)	1/85	0.654526	0.736013	0.627921	0.706096	-0.653632	0.277038	HSPA1A
single-stranded DNA binding (GO:0003697)	1/88	0.667273	0.747345	0.640583	0.709661	-0.664488	0.268823	NEIL3
protein heterodimerization activity (GO:0046982)	4/266	0.420142	0.571934	0.369774	0.507533	-0.306139	0.265472	TOP2A;ITGAM;ERBB2;KLRG1
purine ribonucleoside binding (GO:0032550)	2/160	0.592392	0.694016	0.553515	0.648469	-0.491182	0.257176	RAB26;RHOV
serine-type peptidase activity (GO:0008236)	3/221	0.518326	0.636541	0.471331	0.584479	-0.389683	0.25608	GZMB;ADAM8;TMPRSS13
GTPase binding (GO:0051020)	1/77	0.618105	0.709301	0.591952	0.673766	-0.520129	0.250232	RNF152
double-stranded DNA binding (GO:0003690)	1/100	0.713744	0.778896	0.687093	0.745683	-0.687574	0.231871	NEIL3
core promoter binding (GO:0001047)	1/98	0.706475	0.775737	0.679779	0.740615	-0.582503	0.202401	PROX1
transferase activity, transferring hexosyl groups (GO:0016758)	1/101	0.717312	0.778896	0.690688	0.74669	-0.521053	0.173117	FUT7
phosphatidylinositol phosphate binding (GO:1901981)	1/82	0.641292	0.729926	0.614817	0.694149	-0.387251	0.172044	SH3PXD2B
protein kinase regulator activity (GO:0019887)	1/108	0.741074	0.79808	0.714729	0.769708	-0.571112	0.171136	MAPK8IP1
G-protein coupled receptor activity (GO:0004930)	3/268	0.648624	0.732317	0.599976	0.680134	-0.359596	0.15567	CYSLTR1;VIPR2;NMUR1
Rho GTPase binding (GO:0017048)	1/73	0.598486	0.695336	0.572694	0.66537	-0.290624	0.149192	RTKN2
guanyl ribonucleotide binding (GO:0032561)	2/171	0.628598	0.718398	0.589372	0.673766	-0.289897	0.134589	RAB26;RHOV
sequence-specific double-stranded DNA binding (GO:1990837)	1/113	0.756819	0.808814	0.730757	0.780962	-0.472876	0.131758	KIF2C
endopeptidase activity (GO:0004175)	4/355	0.644606	0.730727	0.588045	0.673766	-0.298932	0.131266	BACE2;GZMB;ADAM8;TMPRSS13
transcription regulatory region DNA binding (GO:0044212)	4/375	0.686521	0.762684	0.630989	0.706708	-0.281541	0.105893	AIRE;PROX1;GLIS2;TEAD3
ubiquitin protein ligase activity (GO:0061630)	2/193	0.693444	0.764426	0.654613	0.721621	-0.280165	0.102564	UBE2C;RNF152
RNA polymerase II transcription factor binding (GO:0001085)	1/122	0.782794	0.830236	0.757387	0.80329	-0.405747	0.0993614	TEAD3
Rab GTPase binding (GO:0017137)	1/131	0.806005	0.851628	0.781402	0.825632	-0.396728	0.0855603	OPTN
ubiquitin protein ligase binding (GO:0031625)	3/285	0.689139	0.762684	0.641229	0.709661	-0.224279	0.083502	UBE2C;AICDA;HSPA1A
cytokine activity (GO:0005125)	1/156	0.858311	0.894361	0.836424	0.867403	-0.528825	0.0807984	TGFB3
endopeptidase inhibitor activity (GO:0004866)	1/112	0.753748	0.808618	0.727625	0.780593	-0.280526	0.0793038	BIRC5
protease binding (GO:0002020)	1/119	0.774458	0.824518	0.748815	0.797217	-0.306409	0.0783155	CD70
cadherin binding (GO:0045296)	4/314	0.547996	0.655297	0.491889	0.598821	-0.110322	0.0663574	CCNB2;ANK3;FAM129B;HSPA1A
ubiquitin-like protein ligase activity (GO:0061659)	2/187	0.676741	0.75493	0.637673	0.709661	-0.140816	0.0549841	UBE2C;RNF152
purine ribonucleoside triphosphate binding (GO:0035639)	4/397	0.728487	0.787553	0.674844	0.73811	-0.123749	0.039202	RAB26;MAP3K20;RHOV;HSPA1A
cytokine receptor binding (GO:0005126)	1/138	0.822336	0.865617	0.798435	0.83731	-0.200376	0.0391948	TGFB3
mRNA binding (GO:0003729)	1/180	0.895245	0.914849	0.876244	0.895432	-0.353943	0.0391667	RBPMS2
transcription regulatory region sequence-specific DNA binding (GO:0000976)	2/293	0.880956	0.910213	0.853582	0.878687	-0.30264	0.0383589	AIRE;PROX1
transcriptional activator activity, RNA polymerase II transcription regulatory region sequence-specific binding (GO:0001228)	2/285	0.871145	0.903409	0.842628	0.870612	-0.1712	0.0236166	AIRE;GLIS2
ubiquitin-like protein ligase binding (GO:0044389)	3/298	0.717697	0.778896	0.670727	0.736485	-0.0526362	0.0174598	UBE2C;AICDA;HSPA1A
DNA binding (GO:0003677)	7/894	0.93056	0.944046	0.896365	0.912662	-0.136802	0.00984548	TOP2A;NEIL3;ZBTB32;SNAI2;PROX1;KLRG1;TEAD3
ATP binding (GO:0005524)	2/256	0.829072	0.869439	0.796514	0.83731	-0.0267768	0.00501925	MAP3K20;HSPA1A
sequence-specific DNA binding (GO:0043565)	2/395	0.958262	0.965156	0.94387	0.952132	-0.0987767	0.00421124	SNAI2;TEAD3
transcription coactivator activity (GO:0003713)	1/292	0.974533	0.978026	0.966597	0.970062	-0.0548747	0.0014156	FAM129B
RNA polymerase II regulatory region sequence-specific DNA binding (GO:0000977)	1/461	0.997032	0.997032	0.995485	0.995485	0.169844	-0.000504908	AIRE
RNA binding (GO:0003723)	13/1388	0.885514	0.911559	0.822275	0.859093	0.0307315	-0.00373654	TOP2A;NQO1;APOBEC2;CDKN2A;MKI67;AICDA;LGALS3;LGALS1;NUSAP1;RBPMS2;MAP3K20;S100A4;HSPA1A
transcriptional activator activity, RNA polymerase II core promoter proximal region sequence-specific binding (GO:0001077)	1/176	0.889834	0.91265	0.870349	0.892665	0.0381838	-0.00445681	GLIS2
GTPase activator activity (GO:0005096)	1/250	0.956678	0.965156	0.945331	0.952132	0.302309	-0.0133889	RAP1GAP2
RNA polymerase II regulatory region DNA binding (GO:0001012)	1/202	0.920603	0.937341	0.904218	0.917322	0.195541	-0.0161765	AIRE
GTPase regulator activity (GO:0030695)	2/276	0.859225	0.894361	0.82943	0.863347	0.165473	-0.0251062	RAP1GAP2;SH3BP4

## Sheet: Upreg 4C12vIso-Biol
Supplemental Table 3. GO Biological Process Analysis of upregulated genes in 4C12 versus Isotype Control treated Treg. 249 upregulated genes (adjusted p<0.05 and fold increase >1.5) were analyzed using the Enrichr analysis tool [27,28].
Term	Overlap	P-value	Adjusted P-value	Old P-value	Old Adjusted P-value	Z-score	Combined Score	Genes
regulation of chromosome segregation (GO:0051983)	6/30	1.58321e-06	0.00202434	2.89899e-06	0.0021583	-1.7172	22.935	SPAG5;NEK2;KIF2C;MKI67;BUB1;AURKB
positive regulation of cellular extravasation (GO:0002693)	2/7	0.00308663	0.187296	0.00439019	0.20365	-3.32684	19.2314	ADAM8;CCR2
regulation of nuclear division (GO:0051783)	4/22	0.00014159	0.0351379	0.000198253	0.0491998	-1.94879	17.2713	NEK2;MKI67;CDC25C;OBSL1
positive regulation of cell aging (GO:0090343)	2/9	0.0052054	0.206909	0.00660781	0.228815	-3.28229	17.2585	CDKN2A;LMNA
extracellular matrix organization (GO:0030198)	12/230	3.19368e-05	0.0158513	2.09744e-05	0.0104103	-1.64381	17.0163	COL18A1;ITGAM;COL6A2;ADAM12;ITGA11;SH3PXD2B;LAMA3;ADAM8;MADCAM1;ITGAE;NPNT;NID2
dendritic cell chemotaxis (GO:0002407)	3/17	0.0011263	0.167706	0.00142764	0.177147	-2.35034	15.956	CCR1;CCR5;CCR2
actin filament network formation (GO:0051639)	2/9	0.0052054	0.206909	0.00660781	0.228815	-2.96747	15.6031	CARMIL1;COBL
negative regulation of leukocyte chemotaxis (GO:0002689)	2/10	0.00645377	0.228151	0.00787046	0.254763	-3.05477	15.4055	PADI2;NBL1
negative regulation of cytokinesis (GO:0032466)	2/7	0.00308663	0.187296	0.00439019	0.20365	-2.6311	15.2095	CHMP4C;AURKB
actin filament organization (GO:0007015)	10/121	2.71906e-06	0.00202434	2.43557e-06	0.0021583	-1.17188	15.0179	CARMIL1;SCIN;NEBL;COBL;EMP2;PROX1;RHOV;OBSL1;ERMN;SHROOM4
regulation of attachment of spindle microtubules to kinetochore (GO:0051988)	2/11	0.00782377	0.237747	0.00923241	0.256763	-3.07755	14.9279	SPAG5;NEK2
sister chromatid segregation (GO:0000819)	4/33	0.000711707	0.15139	0.000794669	0.137507	-2.04008	14.7862	TOP2A;KIF18B;SPAG5;NUSAP1
L-alanine transport (GO:0015808)	2/8	0.00408192	0.202599	0.00544689	0.20796	-2.53799	13.962	SLC36A3;SLC1A4
AV node cell action potential (GO:0086016)	2/8	0.00408192	0.202599	0.00544689	0.20796	-2.50518	13.7815	SCN4B;CACNA1G
regulation of protein targeting to membrane (GO:0090313)	3/28	0.00490779	0.206909	0.0051372	0.20796	-2.55906	13.6063	ITGAM;ERBB2;ANK3
mitotic nuclear division (GO:0140014)	5/75	0.00239951	0.187296	0.00216468	0.189742	-2.20628	13.3094	KIF18B;SPAG5;UBE2C;NUSAP1;BIRC5
cardiac myofibril assembly (GO:0055003)	3/18	0.00133924	0.177619	0.00165176	0.18919	-1.96055	12.9703	NEBL;PROX1;OBSL1
mitotic sister chromatid segregation (GO:0000070)	7/83	7.71504e-05	0.0267463	7.32734e-05	0.0251047	-1.36857	12.96	PSRC1;KIF18B;SPAG5;NUSAP1;CHMP4C;NCAPG;KIF2C
regulation of mitotic nuclear division (GO:0007088)	7/85	8.9813e-05	0.0267463	8.43004e-05	0.0251047	-1.3857	12.9116	NUSAP1;CHMP4C;NEK2;MKI67;CDC25C;OBSL1;HSPA1A
regulation of single stranded viral RNA replication via double stranded DNA intermediate (GO:0045091)	2/11	0.00782377	0.237747	0.00923241	0.256763	-2.64769	12.8429	TOP2A;AICDA
ectoderm development (GO:0007398)	2/11	0.00782377	0.237747	0.00923241	0.256763	-2.62206	12.7185	ITGAM;VAX2
Golgi to plasma membrane protein transport (GO:0043001)	3/25	0.00354106	0.202599	0.00383839	0.20365	-2.24625	12.6763	RAB26;ANK3;OPTN
proline transport (GO:0015824)	2/10	0.00645377	0.228151	0.00787046	0.254763	-2.49037	12.5591	SLC36A3;SLC1A4
cytidine to uridine editing (GO:0016554)	2/12	0.00931223	0.247605	0.0106913	0.256763	-2.67356	12.5027	APOBEC2;AICDA
regulation of monocyte chemotaxis (GO:0090025)	3/23	0.0027768	0.187296	0.00309738	0.20365	-2.11125	12.4278	CCR1;NBL1;CCR2
attachment of mitotic spindle microtubules to kinetochore (GO:0051315)	2/12	0.00931223	0.247605	0.0106913	0.256763	-2.65338	12.4084	NUF2;KIF2C
neuronal action potential (GO:0019228)	3/24	0.00314466	0.187296	0.00345572	0.20365	-2.09735	12.085	CACNA1I;ANK3;CACNA1G
positive regulation of mononuclear cell migration (GO:0071677)	3/20	0.00183708	0.187296	0.00216311	0.189742	-1.89193	11.9184	CCR1;LGALS3;CCR2
protein localization to kinetochore (GO:0034501)	2/13	0.010916	0.270899	0.0122447	0.280497	-2.62299	11.8494	KNL1;AURKB
alanine transport (GO:0032328)	2/10	0.00645377	0.228151	0.00787046	0.254763	-2.30799	11.6394	SLC36A3;SLC1A4
microtubule polymerization or depolymerization (GO:0031109)	3/24	0.00314466	0.187296	0.00345572	0.20365	-2.01195	11.5929	TPPP3;KIF18B;KIF2C
kinetochore organization (GO:0051383)	2/13	0.010916	0.270899	0.0122447	0.280497	-2.53002	11.4294	CENPF;NUF2
mitotic metaphase plate congression (GO:0007080)	4/44	0.00212257	0.187296	0.00212507	0.189742	-1.8277	11.2497	PSRC1;NUF2;CHMP4C;KIF2C
establishment of spindle localization (GO:0051293)	2/11	0.00782377	0.237747	0.00923241	0.256763	-2.31623	11.2351	SPAG5;NUSAP1
negative regulation of cell division (GO:0051782)	2/12	0.00931223	0.247605	0.0106913	0.256763	-2.37961	11.1281	CHMP4C;AURKB
retinal metabolic process (GO:0042574)	2/12	0.00931223	0.247605	0.0106913	0.256763	-2.34347	10.9591	ALDH1A3;BCO2
regulation of cell cycle process (GO:0010564)	6/91	0.000946928	0.156664	0.000831138	0.137507	-1.5474	10.7734	SPAG5;NEK2;MKI67;CDC25C;OBSL1;AURKB
positive regulation of protein targeting to membrane (GO:0090314)	3/23	0.0027768	0.187296	0.00309738	0.20365	-1.8156	10.6875	ITGAM;ERBB2;ANK3
protein localization to chromosome, centromeric region (GO:0071459)	2/16	0.016389	0.294358	0.0174493	0.291155	-2.55421	10.5007	KNL1;AURKB
chromosome condensation (GO:0030261)	3/24	0.00314466	0.187296	0.00345572	0.20365	-1.79803	10.3603	TOP2A;NUSAP1;NCAPG
positive regulation of sodium ion transport (GO:0010765)	2/14	0.0126321	0.289371	0.0138903	0.28726	-2.3108	10.1017	ANK3;SCN4B
divalent metal ion transport (GO:0070838)	6/89	0.000842638	0.156664	0.000744732	0.137507	-1.41584	10.0227	CCR1;NIPAL4;CACNA1I;NMUR1;CCR5;CACNA1G
establishment of chromosome localization (GO:0051303)	2/14	0.0126321	0.289371	0.0138903	0.28726	-2.27548	9.9473	CENPF;KIF2C
microtubule cytoskeleton organization involved in mitosis (GO:1902850)	4/45	0.00230726	0.187296	0.00229372	0.189742	-1.63814	9.9463	STIL;NUF2;NUSAP1;AURKB
embryonic axis specification (GO:0000578)	2/16	0.016389	0.294358	0.0174493	0.291155	-2.39473	9.8451	STIL;COBL
retinoic acid metabolic process (GO:0042573)	2/16	0.016389	0.294358	0.0174493	0.291155	-2.38692	9.81296	ALDH1A3;BCO2
positive regulation of calcium ion-dependent exocytosis (GO:0045956)	2/15	0.0144574	0.294358	0.015626	0.291155	-2.29199	9.71012	CACNA1I;CACNA1G
regulation of neural precursor cell proliferation (GO:2000177)	2/15	0.0144574	0.294358	0.015626	0.291155	-2.24391	9.50643	PROX1;SHCBP1
positive regulation of telomere capping (GO:1904355)	2/18	0.0205596	0.294358	0.0213505	0.29436	-2.41946	9.3982	NEK2;AURKB
retrograde transport, vesicle recycling within Golgi (GO:0000301)	1/7	0.083649	0.404225	0.0874463	0.391203	-3.77783	9.37328	OPTN
cell cycle G2/M phase transition (GO:0044839)	6/128	0.00528042	0.206909	0.00428348	0.20365	-1.77245	9.29431	CCNA2;CCNB2;NEK2;CDC25C;NINL;OPTN
positive regulation of microglial cell activation (GO:1903980)	1/7	0.083649	0.404225	0.0874463	0.391203	-3.71854	9.22617	ITGAM
neural tube development (GO:0021915)	2/17	0.018424	0.294358	0.0193582	0.291155	-2.29679	9.1736	STIL;PROX1
protein localization to microtubule organizing center (GO:1905508)	2/17	0.018424	0.294358	0.0193582	0.291155	-2.27592	9.09025	STIL;SPAG5
membrane raft assembly (GO:0001765)	1/7	0.083649	0.404225	0.0874463	0.391203	-3.61231	8.96259	EMP2
positive regulation of axon guidance (GO:1902669)	1/7	0.083649	0.404225	0.0874463	0.391203	-3.58807	8.90245	DSCAM
microtubule depolymerization (GO:0007019)	2/16	0.016389	0.294358	0.0174493	0.291155	-2.16068	8.88286	KIF18B;KIF2C
centromeric sister chromatid cohesion (GO:0070601)	1/7	0.083649	0.404225	0.0874463	0.391203	-3.57446	8.86869	BUB1
negative regulation of steroid biosynthetic process (GO:0010894)	2/17	0.018424	0.294358	0.0193582	0.291155	-2.16301	8.6393	SNAI2;PROX1
regulation of angiogenesis (GO:0045765)	7/178	0.00689154	0.228151	0.00524871	0.20796	-1.72093	8.56589	ADAM12;ERBB2;STAB1;EMP2;CCR3;FAM129B;CCR2
metaphase plate congression (GO:0051310)	4/45	0.00230726	0.187296	0.00229372	0.189742	-1.41038	8.56338	CENPF;PSRC1;CHMP4C;KIF2C
base conversion or substitution editing (GO:0016553)	2/16	0.016389	0.294358	0.0174493	0.291155	-2.06653	8.49579	APOBEC2;AICDA
positive regulation of cytosolic calcium ion concentration (GO:0007204)	7/134	0.00143145	0.177619	0.00114361	0.170283	-1.29244	8.46428	CCR1;GNA15;CYSLTR1;CIB2;CCR5;CCR3;CCR2
regulation of spindle assembly (GO:0090169)	3/26	0.00396663	0.202599	0.0042459	0.20365	-1.52737	8.44613	SPAG5;CHMP4C;HSPA1A
cardiac muscle cell contraction (GO:0086003)	2/18	0.0205596	0.294358	0.0213505	0.29436	-2.17334	8.44219	SCN4B;CACNA1G
embryonic organ development (GO:0048568)	4/54	0.00449045	0.206909	0.0042444	0.20365	-1.55617	8.41235	ALDH1A3;STIL;COBL;TEAD3
regulation of transcription from RNA polymerase I promoter (GO:0006356)	2/18	0.0205596	0.294358	0.0213505	0.29436	-2.15671	8.37758	RASL11A;ERBB2
establishment of mitotic spindle localization (GO:0040001)	2/19	0.022793	0.314248	0.023424	0.317076	-2.19317	8.29305	SAPCD2;NUSAP1
negative regulation of leukocyte degranulation (GO:0043301)	1/7	0.083649	0.404225	0.0874463	0.391203	-3.33388	8.27177	CCR2
negative regulation of immune response (GO:0050777)	3/45	0.0182275	0.294358	0.0171805	0.291155	-2.06027	8.25102	LGALS3;CCR2;HAVCR2
cellular response to retinoic acid (GO:0071300)	3/43	0.0161405	0.294358	0.0153284	0.291155	-1.99002	8.21166	WNT10B;LTK;EPHA3
negative regulation of cyclase activity (GO:0031280)	2/21	0.0275422	0.356429	0.0278067	0.345034	-2.25054	8.084	HRH4;CCR2
positive regulation of viral life cycle (GO:1903902)	3/45	0.0182275	0.294358	0.0171805	0.291155	-2.00629	8.03483	TOP2A;LGALS1;CHMP4C
response to heparin (GO:0071503)	1/7	0.083649	0.404225	0.0874463	0.391203	-3.23313	8.0218	AOC1
negative regulation of lyase activity (GO:0051350)	2/23	0.0326505	0.373125	0.0324898	0.356332	-2.34031	8.00831	HRH4;CCR2
negative regulation of cellular component organization (GO:0051129)	4/55	0.0047963	0.206909	0.00451339	0.20365	-1.49687	7.99313	LGALS3;CARMIL1;EPHA3;HSPA1A
granzyme-mediated apoptotic signaling pathway (GO:0008626)	1/7	0.083649	0.404225	0.0874463	0.391203	-3.22022	7.98978	GZMB
establishment of spindle orientation (GO:0051294)	2/22	0.0300528	0.360876	0.0301117	0.350283	-2.27788	7.98352	SPAG5;SAPCD2
glutamine family amino acid catabolic process (GO:0009065)	2/17	0.018424	0.294358	0.0193582	0.291155	-1.97954	7.90649	AOC1;GAD1
membrane depolarization during cardiac muscle cell action potential (GO:0086012)	2/18	0.0205596	0.294358	0.0213505	0.29436	-2.02788	7.87716	SCN4B;CACNA1G
chromatin-mediated maintenance of transcription (GO:0048096)	1/8	0.0950158	0.404225	0.0978283	0.391203	-3.33079	7.83973	PADI2
regulation of chemokine-mediated signaling pathway (GO:0070099)	1/7	0.083649	0.404225	0.0874463	0.391203	-3.1263	7.75675	PADI2
regulation of smooth muscle cell differentiation (GO:0051150)	1/8	0.0950158	0.404225	0.0978283	0.391203	-3.29326	7.75138	RBPMS2
positive regulation of monocyte chemotaxis (GO:0090026)	2/18	0.0205596	0.294358	0.0213505	0.29436	-1.98163	7.6975	CCR1;CCR2
gland morphogenesis (GO:0022612)	1/7	0.083649	0.404225	0.0874463	0.391203	-3.10114	7.69431	TGFB3
positive regulation of intracellular protein transport (GO:0090316)	6/153	0.0121915	0.289371	0.00966728	0.256763	-1.72993	7.62383	ITGAM;ABLIM3;ERBB2;NMUR1;ANK3;IL9R
negative regulation of signaling (GO:0023057)	5/84	0.00392363	0.202599	0.00344465	0.20365	-1.37569	7.62234	LTK;SRMS;ERBB2;OPTN;EPHA3
positive regulation of T cell differentiation in thymus (GO:0033089)	1/7	0.083649	0.404225	0.0874463	0.391203	-3.06787	7.61178	ADAM8
positive regulation of leukocyte migration (GO:0002687)	3/35	0.00920152	0.247605	0.00909878	0.256763	-1.61918	7.59132	LGALS3;ADAM8;MADCAM1
hepaticobiliary system development (GO:0061008)	2/22	0.0300528	0.360876	0.0301117	0.350283	-2.16447	7.58605	COBL;PROX1
cell-matrix adhesion (GO:0007160)	5/91	0.0055129	0.21048	0.00476126	0.205102	-1.45863	7.58586	ITGA11;LYPD3;MADCAM1;EMP2;NPNT
mitotic chromosome condensation (GO:0007076)	2/16	0.016389	0.294358	0.0174493	0.291155	-1.84058	7.5669	NUSAP1;NCAPG
protein polymerization (GO:0051258)	3/46	0.0193246	0.294358	0.0181513	0.291155	-1.91579	7.56042	TPPP3;UBE2C;COBL
negative regulation of lymphocyte migration (GO:2000402)	1/7	0.083649	0.404225	0.0874463	0.391203	-3.04513	7.55535	PADI2
polyphosphate metabolic process (GO:0006797)	1/7	0.083649	0.404225	0.0874463	0.391203	-3.03036	7.51871	PRUNE2
regulation of thymocyte apoptotic process (GO:0070243)	1/7	0.083649	0.404225	0.0874463	0.391203	-3.02846	7.51399	ADAM8
mitotic spindle checkpoint (GO:0071174)	2/18	0.0205596	0.294358	0.0213505	0.29436	-1.93271	7.50748	CENPF;BUB1
regulation of endothelial cell chemotaxis to fibroblast growth factor (GO:2000544)	1/8	0.0950158	0.404225	0.0978283	0.391203	-3.18389	7.49396	FGF16
regulation of cell differentiation (GO:0045595)	5/122	0.0180875	0.294358	0.0149814	0.291155	-1.86715	7.492	LGALS3;SCIN;SNAI2;EMP2;EPHA3
negative regulation of immune effector process (GO:0002698)	2/17	0.018424	0.294358	0.0193582	0.291155	-1.87381	7.48418	LGALS3;HAVCR2
spindle assembly checkpoint (GO:0071173)	2/18	0.0205596	0.294358	0.0213505	0.29436	-1.92604	7.48156	CENPF;BUB1
mitotic spindle assembly checkpoint (GO:0007094)	2/18	0.0205596	0.294358	0.0213505	0.29436	-1.92439	7.47517	CENPF;BUB1
ventricular cardiac muscle cell development (GO:0055015)	1/7	0.083649	0.404225	0.0874463	0.391203	-3.01125	7.47129	PROX1
embryonic camera-type eye development (GO:0031076)	1/7	0.083649	0.404225	0.0874463	0.391203	-2.99566	7.43262	ALDH1A3
positive regulation of regulated secretory pathway (GO:1903307)	2/17	0.018424	0.294358	0.0193582	0.291155	-1.85651	7.4151	CACNA1I;CACNA1G
regulation of mitotic spindle organization (GO:0060236)	3/36	0.00994756	0.259568	0.00977599	0.256763	-1.60466	7.39817	PSRC1;CHMP4C;HSPA1A
thiamine-containing compound metabolic process (GO:0042723)	1/8	0.0950158	0.404225	0.0978283	0.391203	-3.14133	7.39378	TKTL1
positive regulation of tumor necrosis factor-mediated signaling pathway (GO:1903265)	1/8	0.0950158	0.404225	0.0978283	0.391203	-3.13987	7.39036	HSPA1A
nucleotide-binding oligomerization domain containing 2 signaling pathway (GO:0070431)	1/7	0.083649	0.404225	0.0874463	0.391203	-2.9682	7.36447	INAVA
kynurenine metabolic process (GO:0070189)	1/9	0.106242	0.404225	0.108093	0.391203	-3.27996	7.35379	KYNU
embryonic organ morphogenesis (GO:0048562)	3/34	0.00848938	0.247605	0.00844996	0.256763	-1.5304	7.29839	ALDH1A3;RBPMS2;DSCAML1
negative regulation of cell proliferation (GO:0008285)	10/364	0.0158281	0.294358	0.0105178	0.256763	-1.75796	7.28843	COL18A1;SCIN;CDKN2A;TGFB3;LMNA;SH3BP4;IGFBP7;PROX1;FAM129B;HSPA1A
protein repair (GO:0030091)	1/7	0.083649	0.404225	0.0874463	0.391203	-2.93609	7.28481	MSRB3
regulation of dopamine metabolic process (GO:0042053)	1/7	0.083649	0.404225	0.0874463	0.391203	-2.93349	7.27835	ITGAM
regulation of cytosolic calcium ion concentration (GO:0051480)	7/138	0.00169499	0.187296	0.00134516	0.177147	-1.13473	7.23968	CCR1;GNA15;CYSLTR1;CIB2;CCR5;CCR3;CCR2
fucose catabolic process (GO:0019317)	1/10	0.11733	0.404225	0.118241	0.391203	-3.35314	7.185	FUT7
epithelial to mesenchymal transition involved in endocardial cushion formation (GO:0003198)	1/7	0.083649	0.404225	0.0874463	0.391203	-2.87941	7.14418	SNAI2
lens fiber cell development (GO:0070307)	1/7	0.083649	0.404225	0.0874463	0.391203	-2.87737	7.13913	PROX1
activation of phospholipase C activity (GO:0007202)	2/23	0.0326505	0.373125	0.0324898	0.356332	-2.08577	7.13728	GNA15;NMUR1
negative regulation of keratinocyte proliferation (GO:0010839)	1/8	0.0950158	0.404225	0.0978283	0.391203	-3.02986	7.13142	SNAI2
positive regulation of mitophagy in response to mitochondrial depolarization (GO:0098779)	1/7	0.083649	0.404225	0.0874463	0.391203	-2.85592	7.0859	OPTN
phospholipase C-activating G-protein coupled acetylcholine receptor signaling pathway (GO:0007207)	1/7	0.083649	0.404225	0.0874463	0.391203	-2.8306	7.02307	GNA15
regulation of macrophage apoptotic process (GO:2000109)	1/7	0.083649	0.404225	0.0874463	0.391203	-2.82494	7.00903	CDKN2A
protein localization to centrosome (GO:0071539)	2/19	0.022793	0.314248	0.023424	0.317076	-1.84066	6.96011	STIL;SPAG5
regulation of adenylate cyclase activity (GO:0045761)	2/29	0.049929	0.404225	0.0481887	0.391203	-2.30398	6.90538	HRH4;CCR2
striated muscle cell differentiation (GO:0051146)	2/20	0.0251214	0.336989	0.0255768	0.331026	-1.87171	6.89544	POPDC2;PROX1
regulation of chondrocyte differentiation (GO:0032330)	2/24	0.0353328	0.373125	0.0349392	0.356332	-2.06044	6.88792	SCIN;SNAI2
G2/M transition of mitotic cell cycle (GO:0000086)	6/127	0.00508433	0.206909	0.00412968	0.20365	-1.30271	6.88037	CCNA2;CCNB2;NEK2;CDC25C;NINL;OPTN
regulation of cortisol biosynthetic process (GO:2000064)	1/7	0.083649	0.404225	0.0874463	0.391203	-2.75321	6.83107	DKK3
negative regulation of cAMP biosynthetic process (GO:0030818)	2/22	0.0300528	0.360876	0.0301117	0.350283	-1.94521	6.81757	HRH4;CCR2
regulation of microglial cell activation (GO:1903978)	1/8	0.0950158	0.404225	0.0978283	0.391203	-2.8919	6.80669	ITGAM
dorsal/ventral pattern formation (GO:0009953)	2/21	0.0275422	0.356429	0.0278067	0.345034	-1.88818	6.78242	NBL1;DSCAML1
histone-serine phosphorylation (GO:0035404)	1/7	0.083649	0.404225	0.0874463	0.391203	-2.72885	6.77061	AURKB
cellular response to unfolded protein (GO:0034620)	2/23	0.0326505	0.373125	0.0324898	0.356332	-1.97705	6.76526	OPTN;HSPA1A
regulation of cardiac muscle cell apoptotic process (GO:0010665)	1/7	0.083649	0.404225	0.0874463	0.391203	-2.72633	6.76437	LTK
regulation of aldosterone biosynthetic process (GO:0032347)	1/7	0.083649	0.404225	0.0874463	0.391203	-2.72144	6.75223	DKK3
calcium ion import (GO:0070509)	2/29	0.049929	0.404225	0.0481887	0.391203	-2.24889	6.74027	CACNA1I;CACNA1G
regulation of mitotic spindle assembly (GO:1901673)	2/20	0.0251214	0.336989	0.0255768	0.331026	-1.82305	6.71617	CHMP4C;HSPA1A
positive regulation of transcription from RNA polymerase I promoter (GO:0045943)	2/22	0.0300528	0.360876	0.0301117	0.350283	-1.90843	6.68867	RASL11A;ERBB2
positive regulation of IRE1-mediated unfolded protein response (GO:1903896)	1/9	0.106242	0.404225	0.108093	0.391203	-2.97808	6.67695	HSPA1A
cleavage furrow formation (GO:0036089)	1/8	0.0950158	0.404225	0.0978283	0.391203	-2.83414	6.67074	AURKB
regulation of glomerular filtration (GO:0003093)	1/7	0.083649	0.404225	0.0874463	0.391203	-2.68222	6.65493	EMP2
negative regulation of chromosome organization (GO:2001251)	1/7	0.083649	0.404225	0.0874463	0.391203	-2.67694	6.64182	TOP2A
lymphatic endothelial cell differentiation (GO:0060836)	1/8	0.0950158	0.404225	0.0978283	0.391203	-2.80872	6.61093	PROX1
membrane depolarization during action potential (GO:0086010)	3/39	0.0123919	0.289371	0.0119801	0.280497	-1.49222	6.55192	CACNA1I;SCN4B;CACNA1G
neutral amino acid transport (GO:0015804)	2/26	0.0409416	0.393303	0.040044	0.37978	-2.03647	6.50775	SLC36A3;SLC1A4
renal system process involved in regulation of blood volume (GO:0001977)	1/7	0.083649	0.404225	0.0874463	0.391203	-2.62113	6.50336	EMP2
regulation of centrosome cycle (GO:0046605)	2/27	0.0438631	0.404225	0.0426957	0.380682	-2.07723	6.49484	CHMP4C;NEK2
positive regulation of myeloid leukocyte mediated immunity (GO:0002888)	1/10	0.11733	0.404225	0.118241	0.391203	-3.0294	6.49129	ITGAM
regulation of skeletal muscle fiber development (GO:0048742)	1/8	0.0950158	0.404225	0.0978283	0.391203	-2.75604	6.48693	FAM129B
response to muramyl dipeptide (GO:0032495)	1/10	0.11733	0.404225	0.118241	0.391203	-3.02298	6.47754	INAVA
release of sequestered calcium ion into cytosol by sarcoplasmic reticulum (GO:0014808)	1/7	0.083649	0.404225	0.0874463	0.391203	-2.5962	6.4415	CCR5
positive regulation of cellular senescence (GO:2000774)	1/8	0.0950158	0.404225	0.0978283	0.391203	-2.73152	6.42921	CDKN2A
positive regulation of skeletal muscle fiber development (GO:0048743)	1/7	0.083649	0.404225	0.0874463	0.391203	-2.58713	6.41898	FAM129B
benzene-containing compound metabolic process (GO:0042537)	1/9	0.106242	0.404225	0.108093	0.391203	-2.86244	6.4177	KYNU
positive regulation of action potential (GO:0045760)	1/7	0.083649	0.404225	0.0874463	0.391203	-2.58193	6.40608	ANK3
bleb assembly (GO:0032060)	1/8	0.0950158	0.404225	0.0978283	0.391203	-2.71939	6.40067	EMP2
regulation of chromatin assembly or disassembly (GO:0001672)	1/8	0.0950158	0.404225	0.0978283	0.391203	-2.71179	6.38277	PADI2
L-amino acid transport (GO:0015807)	2/26	0.0409416	0.393303	0.040044	0.37978	-1.99729	6.38257	SLC36A3;SLC1A4
regulation of interleukin-2 production (GO:0032663)	2/22	0.0300528	0.360876	0.0301117	0.350283	-1.82025	6.3796	CCR2;HAVCR2
negative regulation of mitochondrial outer membrane permeabilization involved in apoptotic signaling pathway (GO:1901029)	1/8	0.0950158	0.404225	0.0978283	0.391203	-2.70606	6.36928	HSPA1A
negative regulation of type 2 immune response (GO:0002829)	1/8	0.0950158	0.404225	0.0978283	0.391203	-2.7054	6.36773	CCR2
cAMP metabolic process (GO:0046058)	2/25	0.0380973	0.391961	0.0374579	0.376856	-1.9477	6.36432	ADCY4;PDE4A
positive regulation of tumor necrosis factor biosynthetic process (GO:0042535)	1/9	0.106242	0.404225	0.108093	0.391203	-2.82677	6.33773	CCR2
cellular response to histamine (GO:0071420)	1/8	0.0950158	0.404225	0.0978283	0.391203	-2.68283	6.31462	AOC1
fusion of virus membrane with host plasma membrane (GO:0019064)	1/8	0.0950158	0.404225	0.0978283	0.391203	-2.68242	6.31365	CCR5
negative regulation of smooth muscle cell differentiation (GO:0051151)	1/7	0.083649	0.404225	0.0874463	0.391203	-2.54297	6.30942	RBPMS2
response to retinoic acid (GO:0032526)	3/58	0.0352779	0.373125	0.0321437	0.356332	-1.87863	6.28307	WNT10B;LTK;EPHA3
L-fucose metabolic process (GO:0042354)	1/10	0.11733	0.404225	0.118241	0.391203	-2.92303	6.26337	FUT7
regulation of metaphase/anaphase transition of cell cycle (GO:1902099)	1/9	0.106242	0.404225	0.108093	0.391203	-2.77861	6.22973	UBE2C
G-protein coupled receptor signaling pathway, coupled to cyclic nucleotide second messenger (GO:0007187)	5/126	0.020489	0.294358	0.01692	0.291155	-1.60016	6.22121	CCR1;GNA15;CYSLTR1;ADCY4;CCR3
regulation of vitamin D biosynthetic process (GO:0060556)	1/8	0.0950158	0.404225	0.0978283	0.391203	-2.63929	6.21213	SNAI2
Golgi to plasma membrane transport (GO:0006893)	3/40	0.0132762	0.294358	0.012773	0.283866	-1.43569	6.20474	RAB26;ANK3;OPTN
positive regulation of protein localization to membrane (GO:1905477)	5/96	0.00689511	0.228151	0.00589747	0.219533	-1.24315	6.18706	ITGAM;ERBB2;GZMB;ANK3;EPHA3
liver development (GO:0001889)	2/32	0.0595508	0.404225	0.0568761	0.391203	-2.19201	6.1835	COBL;PROX1
venous blood vessel development (GO:0060841)	1/8	0.0950158	0.404225	0.0978283	0.391203	-2.6265	6.18202	PROX1
smooth muscle tissue development (GO:0048745)	1/7	0.083649	0.404225	0.0874463	0.391203	-2.48636	6.16897	PROX1
tube closure (GO:0060606)	2/30	0.0530687	0.404225	0.0510265	0.391203	-2.09532	6.1522	STIL;COBL
positive regulation of microtubule polymerization (GO:0031116)	2/25	0.0380973	0.391961	0.0374579	0.376856	-1.87567	6.12895	PSRC1;HSPA1A
regulation of protein localization to cell cortex (GO:1904776)	1/7	0.083649	0.404225	0.0874463	0.391203	-2.46677	6.12036	SAPCD2
negative regulation of B cell apoptotic process (GO:0002903)	1/8	0.0950158	0.404225	0.0978283	0.391203	-2.59834	6.11575	AURKB
regulation of centrosome duplication (GO:0010824)	2/26	0.0409416	0.393303	0.040044	0.37978	-1.90778	6.09651	STIL;CHMP4C
negative regulation of mononuclear cell migration (GO:0071676)	1/7	0.083649	0.404225	0.0874463	0.391203	-2.45459	6.09014	NBL1
regulation of lymphocyte apoptotic process (GO:0070228)	1/7	0.083649	0.404225	0.0874463	0.391203	-2.45004	6.07885	LGALS3
negative regulation of single stranded viral RNA replication via double stranded DNA intermediate (GO:0045869)	1/9	0.106242	0.404225	0.108093	0.391203	-2.70032	6.05422	AICDA
sequestering of extracellular ligand from receptor (GO:0035581)	1/8	0.0950158	0.404225	0.0978283	0.391203	-2.5626	6.03162	NBL1
L-fucose catabolic process (GO:0042355)	1/10	0.11733	0.404225	0.118241	0.391203	-2.80957	6.02025	FUT7
divalent inorganic cation homeostasis (GO:0072507)	2/24	0.0353328	0.373125	0.0349392	0.356332	-1.79923	6.01471	CIB2;ANK3
cellular defense response (GO:0006968)	3/57	0.033753	0.373125	0.0308129	0.352926	-1.77198	6.00469	CCR5;CCR3;KLRG1
positive regulation of membrane potential (GO:0045838)	1/9	0.106242	0.404225	0.108093	0.391203	-2.67266	5.99219	ANK3
negative regulation of DNA metabolic process (GO:0051053)	3/44	0.0171662	0.294358	0.0162395	0.291155	-1.47253	5.98555	TGFB3;AICDA;FAM129B
regulation of microtubule nucleation (GO:0010968)	1/7	0.083649	0.404225	0.0874463	0.391203	-2.41176	5.98387	HSPA1A
heterocycle catabolic process (GO:0046700)	1/7	0.083649	0.404225	0.0874463	0.391203	-2.41035	5.98038	AOC1
negative regulation of extrinsic apoptotic signaling pathway in absence of ligand (GO:2001240)	2/24	0.0353328	0.373125	0.0349392	0.356332	-1.78874	5.97966	SNAI2;HSPA1A
regulation of cyclin-dependent protein serine/threonine kinase activity (GO:0000079)	4/68	0.0101108	0.259568	0.00910741	0.256763	-1.30012	5.97296	PSRC1;CDKN2A;PROX1;CDC25C
central nervous system myelination (GO:0022010)	1/9	0.106242	0.404225	0.108093	0.391203	-2.65765	5.95854	CNTNAP1
positive regulation of blood vessel endothelial cell proliferation involved in sprouting angiogenesis (GO:1903589)	1/8	0.0950158	0.404225	0.0978283	0.391203	-2.53129	5.95794	JCAD
negative regulation of signal transduction in absence of ligand (GO:1901099)	2/24	0.0353328	0.373125	0.0349392	0.356332	-1.78102	5.95384	SNAI2;HSPA1A
negative regulation of signal transduction (GO:0009968)	9/284	0.00923624	0.247605	0.00637542	0.228815	-1.26644	5.93278	LTK;SRMS;ERBB2;SNAI2;CHAC1;EPHA3;GLIS2;FAM129B;DKK3
negative regulation of voltage-gated potassium channel activity (GO:1903817)	1/9	0.106242	0.404225	0.108093	0.391203	-2.64436	5.92874	ANK3
regulation of vasculature development (GO:1901342)	2/29	0.049929	0.404225	0.0481887	0.391203	-1.9756	5.92117	ERBB2;EMP2
macropinocytosis (GO:0044351)	1/7	0.083649	0.404225	0.0874463	0.391203	-2.38316	5.91292	CARMIL1
positive regulation of sodium ion transmembrane transport (GO:1902307)	1/7	0.083649	0.404225	0.0874463	0.391203	-2.37575	5.89454	ANK3
regulation of smooth muscle cell apoptotic process (GO:0034391)	1/9	0.106242	0.404225	0.108093	0.391203	-2.62367	5.88236	CDKN2A
action potential (GO:0001508)	3/55	0.030809	0.366997	0.0282408	0.347526	-1.69006	5.88131	CACNA1I;ANK3;CACNA1G
myelin assembly (GO:0032288)	1/10	0.11733	0.404225	0.118241	0.391203	-2.74037	5.87198	CNTNAP1
membrane assembly (GO:0071709)	2/24	0.0353328	0.373125	0.0349392	0.356332	-1.75637	5.87144	EMP2;ANK3
negative regulation of cell adhesion mediated by integrin (GO:0033629)	1/8	0.0950158	0.404225	0.0978283	0.391203	-2.4925	5.86662	SNAI2
regulation of telomere capping (GO:1904353)	2/24	0.0353328	0.373125	0.0349392	0.356332	-1.74524	5.83425	NEK2;AURKB
cellular response to topologically incorrect protein (GO:0035967)	2/28	0.0468597	0.404225	0.0454112	0.391203	-1.90508	5.83067	OPTN;HSPA1A
basement membrane organization (GO:0071711)	1/9	0.106242	0.404225	0.108093	0.391203	-2.59744	5.82356	NID2
positive regulation of transport (GO:0051050)	3/45	0.0182275	0.294358	0.0171805	0.291155	-1.44668	5.79371	SCIN;SPAG5;SYNGR3
regulation of cell proliferation (GO:0042127)	18/741	0.00525969	0.206909	0.00251236	0.19689	-1.10275	5.78686	BLK;COL18A1;SRMS;CDKN2A;TGFB3;RTKN2;EMP2;PROX1;SHCBP1;FAM129B;ESM1;SCIN;SAPCD2;LMNA;SH3BP4;BIRC5;IGFBP7;HSPA1A
positive regulation of cyclin-dependent protein kinase activity (GO:1904031)	2/27	0.0438631	0.404225	0.0426957	0.380682	-1.84503	5.76881	PSRC1;PROX1
regulation of sarcomere organization (GO:0060297)	1/7	0.083649	0.404225	0.0874463	0.391203	-2.31802	5.75129	PROX1
heterochromatin assembly (GO:0031507)	1/9	0.106242	0.404225	0.108093	0.391203	-2.56129	5.74251	CDKN2A
lamellipodium assembly (GO:0030032)	2/24	0.0353328	0.373125	0.0349392	0.356332	-1.7139	5.72947	CARMIL1;ABLIM3
mitotic spindle organization (GO:0007052)	4/75	0.0141148	0.294358	0.0125152	0.282349	-1.34283	5.72118	STIL;NUF2;BIRC5;AURKB
mitotic cell cycle phase transition (GO:0044772)	8/222	0.00665371	0.228151	0.00482106	0.205102	-1.14026	5.71563	CCNA2;CCNB2;UBE2C;CDKN2A;NEK2;CDC25C;NINL;OPTN
nose development (GO:0043584)	1/9	0.106242	0.404225	0.108093	0.391203	-2.549	5.71495	PROX1
cardiac muscle cell action potential (GO:0086001)	2/30	0.0530687	0.404225	0.0510265	0.391203	-1.94516	5.71133	SCN4B;CACNA1G
membrane fusion involved in viral entry into host cell (GO:0039663)	1/8	0.0950158	0.404225	0.0978283	0.391203	-2.4233	5.70375	CCR5
kinetochore assembly (GO:0051382)	1/9	0.106242	0.404225	0.108093	0.391203	-2.54329	5.70214	CENPF
positive regulation of autophagy (GO:0010508)	3/68	0.0524242	0.404225	0.0470642	0.391203	-1.92205	5.66695	SH3BP4;RNF152;OPTN
second-messenger-mediated signaling (GO:0019932)	3/63	0.0434247	0.404225	0.0392405	0.37978	-1.80531	5.66277	NMUR1;CCR5;KLRG1
cellular response to epidermal growth factor stimulus (GO:0071364)	2/26	0.0409416	0.393303	0.040044	0.37978	-1.75969	5.62328	ERBB2;SNAI2
microglial cell activation (GO:0001774)	1/8	0.0950158	0.404225	0.0978283	0.391203	-2.38523	5.61416	ITGAM
desmosome organization (GO:0002934)	1/9	0.106242	0.404225	0.108093	0.391203	-2.49088	5.58463	SNAI2
peripheral nervous system axon ensheathment (GO:0032292)	1/9	0.106242	0.404225	0.108093	0.391203	-2.48682	5.57554	CNTNAP1
in utero embryonic development (GO:0001701)	2/26	0.0409416	0.393303	0.040044	0.37978	-1.74194	5.56658	STIL;TGFB3
primary neural tube formation (GO:0014020)	2/29	0.049929	0.404225	0.0481887	0.391203	-1.85241	5.55194	STIL;COBL
regulation of methylation-dependent chromatin silencing (GO:0090308)	1/10	0.11733	0.404225	0.118241	0.391203	-2.58159	5.53174	AICDA
hippo signaling (GO:0035329)	2/31	0.0562767	0.404225	0.0539228	0.391203	-1.91912	5.52223	AMOTL1;TEAD3
positive regulation of cyclin-dependent protein serine/threonine kinase activity (GO:0045737)	2/31	0.0562767	0.404225	0.0539228	0.391203	-1.903	5.47584	PSRC1;PROX1
retrograde axonal transport (GO:0008090)	1/8	0.0950158	0.404225	0.0978283	0.391203	-2.32422	5.47054	MGARP
regulation of cell projection organization (GO:0031344)	1/8	0.0950158	0.404225	0.0978283	0.391203	-2.31973	5.45999	ERMN
lamellipodium organization (GO:0097581)	2/26	0.0409416	0.393303	0.040044	0.37978	-1.7009	5.43543	CARMIL1;ABLIM3
glutamate catabolic process (GO:0006538)	1/7	0.083649	0.404225	0.0874463	0.391203	-2.18185	5.41344	GAD1
gland development (GO:0048732)	4/76	0.0147577	0.294358	0.0130599	0.285974	-1.28337	5.41066	TGFB3;COBL;PROX1;DKK3
venous blood vessel morphogenesis (GO:0048845)	1/7	0.083649	0.404225	0.0874463	0.391203	-2.17925	5.40698	PROX1
regulation of extrinsic apoptotic signaling pathway in absence of ligand (GO:2001239)	2/28	0.0468597	0.404225	0.0454112	0.391203	-1.76583	5.4045	SNAI2;HSPA1A
negative regulation of glycoprotein biosynthetic process (GO:0010561)	1/8	0.0950158	0.404225	0.0978283	0.391203	-2.28781	5.38486	BACE2
negative regulation of protein maturation (GO:1903318)	1/11	0.12828	0.404225	0.128275	0.391203	-2.61615	5.37236	CHAC1
positive regulation of telomerase activity (GO:0051973)	2/36	0.0732663	0.404225	0.0692253	0.391203	-2.05479	5.37051	NEK2;AURKB
negative regulation of cellular process (GO:0048523)	13/535	0.0165074	0.294358	0.00983547	0.256763	-1.30831	5.36922	COL18A1;DSCAM;CDKN2A;TGFB3;PROX1;AICDA;FAM129B;PSRC1;SCIN;LMNA;SH3BP4;IGFBP7;HSPA1A
cytoskeleton-dependent cytokinesis (GO:0061640)	4/71	0.0117222	0.286138	0.0104824	0.256763	-1.20486	5.35712	RTKN2;NUSAP1;ANK3;AURKB
exocrine system development (GO:0035272)	1/9	0.106242	0.404225	0.108093	0.391203	-2.38146	5.33932	RAB26
positive regulation of T cell chemotaxis (GO:0010820)	1/10	0.11733	0.404225	0.118241	0.391203	-2.48961	5.33466	CCR2
positive regulation of ion transport (GO:0043270)	3/47	0.0204575	0.294358	0.0191522	0.291155	-1.36791	5.32036	CCR1;ANK3;SCN4B
negative regulation of adenylate cyclase activity (GO:0007194)	2/21	0.0275422	0.356429	0.0278067	0.345034	-1.47615	5.30239	HRH4;CCR2
nicotinamide nucleotide biosynthetic process (GO:0019359)	1/10	0.11733	0.404225	0.118241	0.391203	-2.47383	5.30084	KYNU
calcium ion transport (GO:0006816)	5/119	0.0164139	0.294358	0.0136294	0.28726	-1.28557	5.28322	CCR1;CACNA1I;NMUR1;CCR5;CACNA1G
negative regulation of cell communication (GO:0010648)	4/79	0.0167963	0.294358	0.0147842	0.291155	-1.29226	5.28095	LTK;SRMS;ERBB2;EPHA3
release of sequestered calcium ion into cytosol by endoplasmic reticulum (GO:1903514)	1/8	0.0950158	0.404225	0.0978283	0.391203	-2.2396	5.27136	CCR5
myoblast fusion (GO:0007520)	1/8	0.0950158	0.404225	0.0978283	0.391203	-2.23856	5.26892	ADAM12
protein localization to vacuole (GO:0072665)	1/10	0.11733	0.404225	0.118241	0.391203	-2.45581	5.26222	SH3BP4
actin filament capping (GO:0051693)	1/11	0.12828	0.404225	0.128275	0.391203	-2.55213	5.24089	SCIN
cell junction maintenance (GO:0034331)	1/9	0.106242	0.404225	0.108093	0.391203	-2.33272	5.23003	INAVA
negative regulation of Notch signaling pathway (GO:0045746)	2/30	0.0530687	0.404225	0.0510265	0.391203	-1.77132	5.20089	CHAC1;FAM129B
response to ammonium ion (GO:0060359)	1/9	0.106242	0.404225	0.108093	0.391203	-2.31821	5.19752	PRKCG
regulation of transcription involved in cell fate commitment (GO:0060850)	1/8	0.0950158	0.404225	0.0978283	0.391203	-2.20611	5.19255	PROX1
positive regulation of MAP kinase activity (GO:0043406)	6/178	0.0238357	0.325609	0.0187054	0.291155	-1.38497	5.17503	ERBB2;MAP3K20;ADAM8;MUC20;DUSP9;INAVA
positive regulation of bone resorption (GO:0045780)	1/11	0.12828	0.404225	0.128275	0.391203	-2.51839	5.17161	ADAM8
negative regulation of cyclin-dependent protein serine/threonine kinase activity involved in G1/S transition of mitotic cell cycle (GO:0031658)	1/8	0.0950158	0.404225	0.0978283	0.391203	-2.1945	5.16522	CDKN2A
protein-cofactor linkage (GO:0018065)	1/11	0.12828	0.404225	0.128275	0.391203	-2.50026	5.13437	GAD1
positive regulation of cell adhesion (GO:0045785)	3/65	0.0469237	0.404225	0.0422837	0.380682	-1.67645	5.12866	ERBB2;ADAM8;NPNT
cAMP catabolic process (GO:0006198)	1/8	0.0950158	0.404225	0.0978283	0.391203	-2.17571	5.121	PDE4A
protein localization to Golgi apparatus (GO:0034067)	2/24	0.0353328	0.373125	0.0349392	0.356332	-1.52782	5.10743	OBSL1;OPTN
positive regulation of myeloid cell apoptotic process (GO:0033034)	1/8	0.0950158	0.404225	0.0978283	0.391203	-2.16807	5.10302	CDKN2A
positive regulation of smooth muscle cell apoptotic process (GO:0034393)	1/9	0.106242	0.404225	0.108093	0.391203	-2.2662	5.08091	CDKN2A
regulation of microtubule-based process (GO:0032886)	2/27	0.0438631	0.404225	0.0426957	0.380682	-1.62022	5.06591	ERBB2;EPHA3
Cdc42 protein signal transduction (GO:0032488)	1/10	0.11733	0.404225	0.118241	0.391203	-2.35741	5.05138	RHOV
cardiac muscle cell action potential involved in contraction (GO:0086002)	2/29	0.049929	0.404225	0.0481887	0.391203	-1.6828	5.04363	SCN4B;CACNA1G
positive regulation of dendrite development (GO:1900006)	2/33	0.0628888	0.404225	0.0598845	0.391203	-1.8171	5.02681	COBL;OBSL1
cellular response to interleukin-17 (GO:0097398)	1/9	0.106242	0.404225	0.108093	0.391203	-2.23548	5.01203	IL17RB
regulation of bile acid biosynthetic process (GO:0070857)	1/10	0.11733	0.404225	0.118241	0.391203	-2.32968	4.99195	PROX1
membrane raft organization (GO:0031579)	1/11	0.12828	0.404225	0.128275	0.391203	-2.42704	4.98401	EMP2
epithelium development (GO:0060429)	4/116	0.0564688	0.404225	0.0480615	0.391203	-1.72991	4.97189	LGALS3;STIL;SNAI2;PROX1
positive regulation of cell-substrate adhesion (GO:0010811)	3/53	0.0280068	0.356429	0.0257884	0.331026	-1.38709	4.95927	CARMIL1;EMP2;NPNT
negative regulation of endocytosis (GO:0045806)	2/29	0.049929	0.404225	0.0481887	0.391203	-1.65235	4.95234	LGALS3;EPHA3
glycine transport (GO:0015816)	1/10	0.11733	0.404225	0.118241	0.391203	-2.31107	4.95209	SLC36A3
cell migration involved in heart development (GO:0060973)	1/9	0.106242	0.404225	0.108093	0.391203	-2.20589	4.94567	SNAI2
negative regulation of cardiac muscle hypertrophy (GO:0010614)	1/12	0.139096	0.404225	0.138195	0.391203	-2.50702	4.94534	LMNA
Schwann cell development (GO:0014044)	1/9	0.106242	0.404225	0.108093	0.391203	-2.19457	4.92031	CNTNAP1
negative regulation of transcription from RNA polymerase II promoter in response to stress (GO:0097201)	1/11	0.12828	0.404225	0.128275	0.391203	-2.3876	4.90303	HSPA1A
embryonic digestive tract morphogenesis (GO:0048557)	1/10	0.11733	0.404225	0.118241	0.391203	-2.28305	4.89205	RBPMS2
cortical cytoskeleton organization (GO:0030865)	2/30	0.0530687	0.404225	0.0510265	0.391203	-1.66487	4.88834	RTKN2;RHOV
negative regulation of vascular endothelial growth factor receptor signaling pathway (GO:0030948)	1/10	0.11733	0.404225	0.118241	0.391203	-2.281	4.88764	FAM129B
glucose import (GO:0046323)	1/10	0.11733	0.404225	0.118241	0.391203	-2.27286	4.8702	SLC2A6
regulation of mitotic cell cycle (GO:0007346)	6/166	0.0175806	0.294358	0.0138492	0.28726	-1.19975	4.84813	PSRC1;BIRC5;NEK2;MKI67;CDC25C;OBSL1
positive regulation of calcium ion transport (GO:0051928)	2/34	0.0662888	0.404225	0.0629466	0.391203	-1.78379	4.84074	CCR1;LGALS3
positive regulation of myeloid cell differentiation (GO:0045639)	2/30	0.0530687	0.404225	0.0510265	0.391203	-1.63876	4.81167	SCIN;HSPA1A
indolalkylamine catabolic process (GO:0046218)	1/10	0.11733	0.404225	0.118241	0.391203	-2.24526	4.81108	KYNU
renal water homeostasis (GO:0003091)	2/32	0.0595508	0.404225	0.0568761	0.391203	-1.70506	4.80984	ADCY4;AQP4
cellular response to acid chemical (GO:0071229)	4/92	0.0276125	0.356429	0.0238832	0.317518	-1.33771	4.80168	WNT10B;LTK;SH3BP4;EPHA3
negative regulation of cellular response to growth factor stimulus (GO:0090288)	3/56	0.0322634	0.373125	0.029512	0.350283	-1.39817	4.80108	RBPMS2;NBL1;FAM129B
negative regulation of BMP signaling pathway (GO:0030514)	2/33	0.0628888	0.404225	0.0598845	0.391203	-1.7344	4.79803	RBPMS2;NBL1
regulation of organ morphogenesis (GO:2000027)	1/10	0.11733	0.404225	0.118241	0.391203	-2.23813	4.79579	SAPCD2
regulation of cell cycle G2/M phase transition (GO:1902749)	4/85	0.0213808	0.30034	0.0186486	0.291155	-1.24501	4.7874	CENPF;NEK2;HMMR;NINL
podosome assembly (GO:0071800)	1/10	0.11733	0.404225	0.118241	0.391203	-2.22297	4.7633	SH3PXD2B
negative regulation of T cell activation (GO:0050868)	2/35	0.0697486	0.404225	0.0660607	0.391203	-1.7852	4.75374	LGALS3;HAVCR2
calcium ion regulated exocytosis (GO:0017156)	1/12	0.139096	0.404225	0.138195	0.391203	-2.40833	4.75065	SCIN
adipose tissue development (GO:0060612)	1/10	0.11733	0.404225	0.118241	0.391203	-2.21592	4.74821	SH3PXD2B
pinocytosis (GO:0006907)	1/10	0.11733	0.404225	0.118241	0.391203	-2.21359	4.74321	CARMIL1
negative regulation of lymphocyte apoptotic process (GO:0070229)	1/10	0.11733	0.404225	0.118241	0.391203	-2.21039	4.73635	AURKB
DNA cytosine deamination (GO:0070383)	1/9	0.106242	0.404225	0.108093	0.391203	-2.1103	4.73137	AICDA
modulation by host of viral genome replication (GO:0044827)	1/12	0.139096	0.404225	0.138195	0.391203	-2.39646	4.72724	FBXL2
regulation of macrophage cytokine production (GO:0010935)	1/10	0.11733	0.404225	0.118241	0.391203	-2.20107	4.71638	TGFB3
microtubule bundle formation (GO:0001578)	2/33	0.0628888	0.404225	0.0598845	0.391203	-1.70459	4.71556	TPPP3;PSRC1
positive regulation of calcium ion import (GO:0090280)	1/11	0.12828	0.404225	0.128275	0.391203	-2.29557	4.71403	LGALS3
regulation of striated muscle tissue development (GO:0016202)	1/10	0.11733	0.404225	0.118241	0.391203	-2.19913	4.71222	CENPF
positive regulation of protein serine/threonine kinase activity (GO:0071902)	4/119	0.0608945	0.404225	0.051774	0.391203	-1.6796	4.70055	PSRC1;ERBB2;ADAM8;PROX1
positive regulation of leukocyte degranulation (GO:0043302)	1/12	0.139096	0.404225	0.138195	0.391203	-2.3821	4.69893	ITGAM
dicarboxylic acid biosynthetic process (GO:0043650)	1/11	0.12828	0.404225	0.128275	0.391203	-2.28742	4.6973	KYNU
protein depolymerization (GO:0051261)	2/26	0.0409416	0.393303	0.040044	0.37978	-1.46517	4.68211	KIF18B;KIF2C
negative regulation of growth (GO:0045926)	4/121	0.0639442	0.404225	0.0543339	0.391203	-1.70239	4.68112	PSRC1;CDKN2A;SH3BP4;HSPA1A
regulation of cardiac muscle hypertrophy in response to stress (GO:1903242)	1/7	0.083649	0.404225	0.0874463	0.391203	-1.8824	4.67046	LMNA
negative regulation of inclusion body assembly (GO:0090084)	1/11	0.12828	0.404225	0.128275	0.391203	-2.27075	4.66308	HSPA1A
T cell mediated immunity (GO:0002456)	1/10	0.11733	0.404225	0.118241	0.391203	-2.17582	4.66227	AIRE
response to vitamin (GO:0033273)	1/10	0.11733	0.404225	0.118241	0.391203	-2.16428	4.63755	KYNU
neural tube closure (GO:0001843)	2/34	0.0662888	0.404225	0.0629466	0.391203	-1.70464	4.62593	STIL;COBL
chordate embryonic development (GO:0043009)	3/57	0.033753	0.373125	0.0308129	0.352926	-1.3646	4.62421	STIL;TGFB3;PROX1
positive regulation of bone remodeling (GO:0046852)	1/11	0.12828	0.404225	0.128275	0.391203	-2.23072	4.58086	ADAM8
cellular response to ATP (GO:0071318)	1/11	0.12828	0.404225	0.128275	0.391203	-2.22327	4.56557	CIB2
regulation of heart rate by cardiac conduction (GO:0086091)	2/36	0.0732663	0.404225	0.0692253	0.391203	-1.73573	4.53661	SCN4B;CACNA1G
positive regulation of T cell apoptotic process (GO:0070234)	1/11	0.12828	0.404225	0.128275	0.391203	-2.20524	4.52854	ADAM8
macrophage migration (GO:1905517)	1/11	0.12828	0.404225	0.128275	0.391203	-2.20338	4.52473	LGALS3
regulation of muscle organ development (GO:0048634)	1/9	0.106242	0.404225	0.108093	0.391203	-2.01227	4.51158	CENPF
serine family amino acid catabolic process (GO:0009071)	1/10	0.11733	0.404225	0.118241	0.391203	-2.10153	4.5031	AOC1
positive regulation of protein maturation (GO:1903319)	1/10	0.11733	0.404225	0.118241	0.391203	-2.10094	4.50182	ADAM8
maintenance of protein location in extracellular region (GO:0071694)	1/7	0.083649	0.404225	0.0874463	0.391203	-1.81438	4.50172	NBL1
somatic hypermutation of immunoglobulin genes (GO:0016446)	1/13	0.149777	0.406226	0.148003	0.394234	-2.37063	4.50089	AICDA
positive regulation of cytoskeleton organization (GO:0051495)	3/78	0.0728559	0.404225	0.0648077	0.391203	-1.71531	4.49286	CARMIL1;SPAG5;PROX1
regulation of cell-matrix adhesion (GO:0001952)	3/53	0.0280068	0.356429	0.0257884	0.331026	-1.25454	4.48536	CDKN2A;EMP2;EPHA3
cytoskeleton organization (GO:0007010)	5/127	0.0211203	0.299506	0.0174294	0.291155	-1.16032	4.47596	CNTNAP1;RTKN2;RHOV;ANK3;OBSL1
axonal transport of mitochondrion (GO:0019896)	1/10	0.11733	0.404225	0.118241	0.391203	-2.08878	4.47577	MGARP
positive regulation of telomere maintenance via telomerase (GO:0032212)	2/33	0.0628888	0.404225	0.0598845	0.391203	-1.60268	4.43364	NEK2;AURKB
inhibition of cysteine-type endopeptidase activity involved in apoptotic process (GO:1990001)	1/12	0.139096	0.404225	0.138195	0.391203	-2.24492	4.42832	BIRC5
integrin-mediated signaling pathway (GO:0007229)	3/59	0.0368378	0.386278	0.0335041	0.356332	-1.33889	4.41998	ITGA11;ADAM11;MADCAM1
negative regulation of delayed rectifier potassium channel activity (GO:1902260)	1/7	0.083649	0.404225	0.0874463	0.391203	-1.76837	4.38755	ANK3
positive regulation of sodium ion transmembrane transporter activity (GO:2000651)	1/12	0.139096	0.404225	0.138195	0.391203	-2.22359	4.38625	ANK3
positive regulation of phospholipase C activity (GO:0010863)	2/31	0.0562767	0.404225	0.0539228	0.391203	-1.52278	4.38175	GNA15;NMUR1
regulation of morphogenesis of an epithelium (GO:1905330)	1/10	0.11733	0.404225	0.118241	0.391203	-2.04114	4.3737	SAPCD2
positive regulation of tumor necrosis factor secretion (GO:1904469)	1/12	0.139096	0.404225	0.138195	0.391203	-2.21298	4.36532	HAVCR2
protein sumoylation (GO:0016925)	3/69	0.0543239	0.404225	0.0487145	0.391203	-1.4941	4.352	TOP2A;BIRC5;AURKB
positive regulation of actin filament depolymerization (GO:0030836)	1/12	0.139096	0.404225	0.138195	0.391203	-2.19917	4.33807	CARMIL1
positive regulation of leukocyte apoptotic process (GO:2000108)	1/10	0.11733	0.404225	0.118241	0.391203	-2.01814	4.32441	CDKN2A
positive regulation of adaptive immune response based on somatic recombination of immune receptors built from immunoglobulin superfamily domains (GO:0002824)	1/11	0.12828	0.404225	0.128275	0.391203	-2.09179	4.29557	CCR2
regulation of hemopoiesis (GO:1903706)	1/12	0.139096	0.404225	0.138195	0.391203	-2.16904	4.27863	LGALS3
DNA topological change (GO:0006265)	1/10	0.11733	0.404225	0.118241	0.391203	-1.99544	4.27576	TOP2A
mitotic cytokinesis (GO:0000281)	3/60	0.0384327	0.391961	0.0348941	0.356332	-1.30973	4.26822	RTKN2;NUSAP1;ANK3
cellular response to magnesium ion (GO:0071286)	1/7	0.083649	0.404225	0.0874463	0.391203	-1.71724	4.26068	ANK3
negative regulation of catenin import into nucleus (GO:0035414)	1/10	0.11733	0.404225	0.118241	0.391203	-1.98225	4.2475	SNAI2
negative regulation of leukocyte activation (GO:0002695)	1/12	0.139096	0.404225	0.138195	0.391203	-2.14568	4.23257	HAVCR2
positive regulation of transcription from RNA polymerase III promoter (GO:0045945)	1/11	0.12828	0.404225	0.128275	0.391203	-2.06088	4.23209	ERBB2
Golgi ribbon formation (GO:0090161)	1/12	0.139096	0.404225	0.138195	0.391203	-2.13926	4.21988	OPTN
adrenal gland development (GO:0030325)	1/11	0.12828	0.404225	0.128275	0.391203	-2.04693	4.20345	DKK3
regulation of homotypic cell-cell adhesion (GO:0034110)	1/10	0.11733	0.404225	0.118241	0.391203	-1.96047	4.20082	ANK3
skeletal muscle thin filament assembly (GO:0030240)	1/11	0.12828	0.404225	0.128275	0.391203	-2.04553	4.20057	PROX1
regulation of tumor necrosis factor biosynthetic process (GO:0042534)	1/12	0.139096	0.404225	0.138195	0.391203	-2.12239	4.18662	CCR2
embryonic eye morphogenesis (GO:0048048)	1/12	0.139096	0.404225	0.138195	0.391203	-2.11795	4.17786	ALDH1A3
positive regulation of megakaryocyte differentiation (GO:0045654)	1/7	0.083649	0.404225	0.0874463	0.391203	-1.68078	4.17023	SCIN
regulation of B cell apoptotic process (GO:0002902)	1/11	0.12828	0.404225	0.128275	0.391203	-2.02878	4.16619	AURKB
organic cyclic compound catabolic process (GO:1901361)	1/12	0.139096	0.404225	0.138195	0.391203	-2.10901	4.16022	AOC1
protein autophosphorylation (GO:0046777)	5/176	0.0685409	0.404225	0.0558341	0.391203	-1.54687	4.14611	BLK;SRMS;ERBB2;NEK2;AURKB
tryptophan metabolic process (GO:0006568)	1/11	0.12828	0.404225	0.128275	0.391203	-2.00842	4.12438	KYNU
mitotic spindle elongation (GO:0000022)	1/12	0.139096	0.404225	0.138195	0.391203	-2.08392	4.11073	AURKB
positive regulation of telomere maintenance via telomere lengthening (GO:1904358)	2/35	0.0697486	0.404225	0.0660607	0.391203	-1.53215	4.07989	NEK2;AURKB
positive regulation of establishment of protein localization to mitochondrion (GO:1903749)	4/111	0.0494938	0.404225	0.0422151	0.380682	-1.35622	4.07666	ABLIM3;GZMB;NMUR1;IL9R
hepatocyte growth factor receptor signaling pathway (GO:0048012)	1/12	0.139096	0.404225	0.138195	0.391203	-2.06447	4.07236	MUC20
cyclic nucleotide catabolic process (GO:0009214)	1/10	0.11733	0.404225	0.118241	0.391203	-1.89798	4.06693	PDE4A
centromere complex assembly (GO:0034508)	2/37	0.07684	0.404225	0.0724387	0.391203	-1.58406	4.06475	CENPF;KNL1
mitotic nuclear envelope reassembly (GO:0007084)	1/11	0.12828	0.404225	0.128275	0.391203	-1.97919	4.06434	LMNA
positive regulation of mitochondrion organization (GO:0010822)	4/129	0.0769248	0.404225	0.0652465	0.391203	-1.58306	4.06043	ABLIM3;NMUR1;MGARP;IL9R
cytoskeletal anchoring at plasma membrane (GO:0007016)	1/10	0.11733	0.404225	0.118241	0.391203	-1.88474	4.03856	ANK3
regulation of T cell chemotaxis (GO:0010819)	1/11	0.12828	0.404225	0.128275	0.391203	-1.96485	4.0349	CCR2
positive regulation of skeletal muscle tissue development (GO:0048643)	1/13	0.149777	0.406226	0.148003	0.394234	-2.12178	4.02843	FAM129B
positive regulation of transferase activity (GO:0051347)	5/138	0.0289111	0.360876	0.0237139	0.317518	-1.1365	4.02722	LTK;ERBB2;NEK2;AURKB;EPHA3
dicarboxylic acid catabolic process (GO:0043649)	1/14	0.160327	0.413441	0.1577	0.396608	-2.19321	4.01476	GAD1
neuron projection morphogenesis (GO:0048812)	5/164	0.0538404	0.404225	0.043875	0.386567	-1.37367	4.01349	CNTNAP1;S100A6;ANK3;NBL1;DSCAML1
regulation of sodium ion transmembrane transporter activity (GO:2000649)	2/38	0.0804676	0.404225	0.0756996	0.391203	-1.58916	4.00452	ANK3;SCN4B
positive regulation of interleukin-1 production (GO:0032732)	1/13	0.149777	0.406226	0.148003	0.394234	-2.1051	3.99675	INAVA
regulation of mitotic cell cycle phase transition (GO:1901990)	5/185	0.0808851	0.404225	0.0659241	0.391203	-1.58891	3.99566	CENPF;UBE2C;NEK2;HMMR;NINL
regulation of T-helper 1 type immune response (GO:0002825)	1/10	0.11733	0.404225	0.118241	0.391203	-1.86301	3.99199	CCR2
regulation of kinase activity (GO:0043549)	4/102	0.0382153	0.391961	0.0327685	0.356332	-1.22152	3.98767	LTK;ERBB2;EMP2;EPHA3
negative regulation of bone mineralization (GO:0030502)	1/12	0.139096	0.404225	0.138195	0.391203	-2.01798	3.98066	CCR1
magnesium ion transport (GO:0015693)	1/12	0.139096	0.404225	0.138195	0.391203	-2.01586	3.97647	NIPAL4
regulation of inclusion body assembly (GO:0090083)	1/12	0.139096	0.404225	0.138195	0.391203	-2.01493	3.97464	HSPA1A
interleukin-17-mediated signaling pathway (GO:0097400)	1/9	0.106242	0.404225	0.108093	0.391203	-1.77263	3.9743	IL17RB
succinate metabolic process (GO:0006105)	1/9	0.106242	0.404225	0.108093	0.391203	-1.77106	3.97077	GAD1
regulation of mitotic centrosome separation (GO:0046602)	1/12	0.139096	0.404225	0.138195	0.391203	-2.01244	3.96972	NEK2
cellular response to decreased oxygen levels (GO:0036294)	3/65	0.0469237	0.404225	0.0422837	0.380682	-1.29655	3.96646	LMNA;ADAM8;MGARP
positive regulation of T-helper 1 type immune response (GO:0002827)	1/13	0.149777	0.406226	0.148003	0.394234	-2.07038	3.93084	CCR2
response to magnesium ion (GO:0032026)	1/9	0.106242	0.404225	0.108093	0.391203	-1.74678	3.91635	ANK3
response to sterol (GO:0036314)	1/12	0.139096	0.404225	0.138195	0.391203	-1.98524	3.91607	CCR5
positive regulation of viral release from host cell (GO:1902188)	1/16	0.181036	0.413441	0.176767	0.396608	-2.29131	3.91598	CHMP4C
negative regulation of chondrocyte differentiation (GO:0032331)	1/13	0.149777	0.406226	0.148003	0.394234	-2.0621	3.91512	SNAI2
tryptophan catabolic process (GO:0006569)	1/11	0.12828	0.404225	0.128275	0.391203	-1.90517	3.91234	KYNU
exit from mitosis (GO:0010458)	1/13	0.149777	0.406226	0.148003	0.394234	-2.05994	3.91101	UBE2C
cell-substrate junction assembly (GO:0007044)	1/12	0.139096	0.404225	0.138195	0.391203	-1.98	3.90574	LAMA3
epithelial to mesenchymal transition (GO:0001837)	2/38	0.0804676	0.404225	0.0756996	0.391203	-1.54965	3.90497	SNAI2;S100A4
positive regulation of protein polymerization (GO:0032273)	3/65	0.0469237	0.404225	0.0422837	0.380682	-1.27092	3.88804	CARMIL1;TPPP3;PSRC1
positive regulation of membrane depolarization (GO:1904181)	1/8	0.0950158	0.404225	0.0978283	0.391203	-1.64965	3.8828	ANK3
DNA deamination (GO:0045006)	1/13	0.149777	0.406226	0.148003	0.394234	-2.03971	3.87261	AICDA
myosin filament assembly (GO:0031034)	1/12	0.139096	0.404225	0.138195	0.391203	-1.96265	3.87152	OBSL1
regulation of symbiosis, encompassing mutualism through parasitism (GO:0043903)	1/12	0.139096	0.404225	0.138195	0.391203	-1.95421	3.85487	CHMP4C
regulation of mononuclear cell migration (GO:0071675)	1/13	0.149777	0.406226	0.148003	0.394234	-2.02618	3.84691	LGALS3
cellular modified amino acid catabolic process (GO:0042219)	1/13	0.149777	0.406226	0.148003	0.394234	-2.01511	3.8259	CHAC1
regulation of vascular endothelial growth factor signaling pathway (GO:1900746)	1/12	0.139096	0.404225	0.138195	0.391203	-1.93836	3.8236	JCAD
negative regulation of muscle cell differentiation (GO:0051148)	1/16	0.181036	0.413441	0.176767	0.396608	-2.22881	3.80917	RBPMS2
purine nucleobase metabolic process (GO:0006144)	1/12	0.139096	0.404225	0.138195	0.391203	-1.92018	3.78774	GDA
positive regulation of isomerase activity (GO:0010912)	1/8	0.0950158	0.404225	0.0978283	0.391203	-1.608	3.78476	ITGAM
oligodendrocyte development (GO:0014003)	1/13	0.149777	0.406226	0.148003	0.394234	-1.99158	3.78122	CNTNAP1
positive regulation of protein targeting to mitochondrion (GO:1903955)	3/82	0.0818834	0.404225	0.0726504	0.391203	-1.50782	3.77327	ABLIM3;NMUR1;IL9R
histone phosphorylation (GO:0016572)	1/10	0.11733	0.404225	0.118241	0.391203	-1.75746	3.76582	CCNA2
regulation of integrin-mediated signaling pathway (GO:2001044)	1/12	0.139096	0.404225	0.138195	0.391203	-1.9082	3.76411	EMP2
regulation of chromatin organization (GO:1902275)	1/11	0.12828	0.404225	0.128275	0.391203	-1.82635	3.75049	MKI67
response to histamine (GO:0034776)	1/11	0.12828	0.404225	0.128275	0.391203	-1.82506	3.74783	AOC1
phosphatidylinositol 3-kinase signaling (GO:0014065)	2/31	0.0562767	0.404225	0.0539228	0.391203	-1.30208	3.7467	LTK;ERBB2
negative regulation of angiogenesis (GO:0016525)	3/70	0.0562563	0.404225	0.0503929	0.391203	-1.30183	3.74646	STAB1;FAM129B;CCR2
negative regulation of transmembrane receptor protein serine/threonine kinase signaling pathway (GO:0090101)	3/78	0.0728559	0.404225	0.0648077	0.391203	-1.43033	3.74641	RBPMS2;NBL1;HSPA1A
sarcoplasmic reticulum calcium ion transport (GO:0070296)	1/10	0.11733	0.404225	0.118241	0.391203	-1.74769	3.74489	CCR5
sequestering of actin monomers (GO:0042989)	1/11	0.12828	0.404225	0.128275	0.391203	-1.82052	3.73852	SCIN
SA node cell action potential (GO:0086015)	1/8	0.0950158	0.404225	0.0978283	0.391203	-1.5863	3.7337	CACNA1G
replicative senescence (GO:0090399)	1/12	0.139096	0.404225	0.138195	0.391203	-1.89258	3.73329	CDKN2A
regulation of T cell differentiation in thymus (GO:0033081)	1/13	0.149777	0.406226	0.148003	0.394234	-1.95208	3.70623	ADAM8
nitric oxide biosynthetic process (GO:0006809)	1/12	0.139096	0.404225	0.138195	0.391203	-1.87675	3.70208	NQO1
positive regulation of nuclease activity (GO:0032075)	1/11	0.12828	0.404225	0.128275	0.391203	-1.79996	3.69629	HSPA1A
negative regulation of neuron apoptotic process (GO:0043524)	3/64	0.0451573	0.404225	0.0407476	0.380682	-1.19178	3.69167	PRKCG;TGFB3;ADAM8
positive regulation of superoxide anion generation (GO:0032930)	1/12	0.139096	0.404225	0.138195	0.391203	-1.86709	3.68301	ITGAM
mitochondrion transport along microtubule (GO:0047497)	1/13	0.149777	0.406226	0.148003	0.394234	-1.92935	3.66308	MGARP
positive regulation of peptide secretion (GO:0002793)	2/36	0.0732663	0.404225	0.0692253	0.391203	-1.39904	3.6566	TGFB3;ADAM8
positive regulation of endothelial cell chemotaxis (GO:2001028)	1/14	0.160327	0.413441	0.1577	0.396608	-1.99711	3.6558	FGF16
positive regulation of neuron differentiation (GO:0045666)	4/99	0.034822	0.373125	0.0299262	0.350283	-1.08746	3.65115	LTK;PROX1;NBL1;EPHA3
positive regulation of MAPK cascade (GO:0043410)	8/290	0.0286963	0.360876	0.0207293	0.29436	-1.02785	3.64987	CCR1;LTK;ERBB2;ADAM8;NPNT;EPHA3;JCAD;INAVA
negative regulation of vascular smooth muscle cell proliferation (GO:1904706)	1/13	0.149777	0.406226	0.148003	0.394234	-1.91646	3.63861	TGFB3
regulation of stress-activated MAPK cascade (GO:0032872)	2/42	0.0954813	0.404225	0.0891882	0.391203	-1.54863	3.63746	INAVA;MAPK8IP1
regulation of cell communication by electrical coupling (GO:0010649)	1/13	0.149777	0.406226	0.148003	0.394234	-1.90839	3.62327	ANK3
cardiocyte differentiation (GO:0035051)	1/14	0.160327	0.413441	0.1577	0.396608	-1.97923	3.62307	PROX1
proline metabolic process (GO:0006560)	1/8	0.0950158	0.404225	0.0978283	0.391203	-1.53022	3.6017	AOC1
positive regulation of telomere maintenance (GO:0032206)	2/33	0.0628888	0.404225	0.0598845	0.391203	-1.29788	3.59043	NEK2;AURKB
regulation of tumor necrosis factor secretion (GO:1904467)	1/16	0.181036	0.413441	0.176767	0.396608	-2.09743	3.58462	HAVCR2
amyloid-beta metabolic process (GO:0050435)	1/15	0.170746	0.413441	0.167288	0.396608	-2.02154	3.57323	BACE2
regulation of blood vessel endothelial cell proliferation involved in sprouting angiogenesis (GO:1903587)	1/12	0.139096	0.404225	0.138195	0.391203	-1.8094	3.56921	JCAD
regulation of ventricular cardiac muscle cell membrane repolarization (GO:0060307)	1/15	0.170746	0.413441	0.167288	0.396608	-2.01675	3.56477	SCN4B
pyrimidine nucleoside salvage (GO:0043097)	1/13	0.149777	0.406226	0.148003	0.394234	-1.87478	3.55946	TK1
regulation of sister chromatid cohesion (GO:0007063)	1/13	0.149777	0.406226	0.148003	0.394234	-1.87092	3.55214	BUB1
negative regulation of protein modification by small protein conjugation or removal (GO:1903321)	2/47	0.115249	0.404225	0.106946	0.391203	-1.64216	3.54815	PRKCG;HSPA1A
regulation of vasculogenesis (GO:2001212)	1/13	0.149777	0.406226	0.148003	0.394234	-1.86824	3.54705	EMP2
negative regulation of biomineral tissue development (GO:0070168)	1/15	0.170746	0.413441	0.167288	0.396608	-1.99645	3.52889	CCR1
negative regulation of signal transduction by p53 class mediator (GO:1901797)	1/16	0.181036	0.413441	0.176767	0.396608	-2.06461	3.52853	SNAI2
cognition (GO:0050890)	2/41	0.091656	0.404225	0.0857521	0.391203	-1.474	3.52244	SLC1A4;SHROOM4
positive regulation of viral entry into host cell (GO:0046598)	1/9	0.106242	0.404225	0.108093	0.391203	-1.57044	3.52097	LGALS1
monosaccharide transport (GO:0015749)	1/15	0.170746	0.413441	0.167288	0.396608	-1.99118	3.51956	SLC2A6
regulated exocytosis (GO:0045055)	4/149	0.114558	0.404225	0.0970731	0.391203	-1.62401	3.5187	SCIN;TGFB3;RAB26;SYNGR3
nuclear envelope disassembly (GO:0051081)	2/47	0.115249	0.404225	0.106946	0.391203	-1.62547	3.51208	CCNB2;LMNA
regulation of T cell apoptotic process (GO:0070232)	1/11	0.12828	0.404225	0.128275	0.391203	-1.70674	3.50486	LGALS3
positive regulation of mitotic nuclear division (GO:0045840)	2/41	0.091656	0.404225	0.0857521	0.391203	-1.46618	3.50376	UBE2C;NUSAP1
negative regulation of cartilage development (GO:0061037)	1/14	0.160327	0.413441	0.1577	0.396608	-1.9076	3.49195	SNAI2
positive regulation of cell projection organization (GO:0031346)	3/64	0.0451573	0.404225	0.0407476	0.380682	-1.12632	3.4889	CARMIL1;LTK;EPHA3
eye photoreceptor cell differentiation (GO:0001754)	1/13	0.149777	0.406226	0.148003	0.394234	-1.83495	3.48385	DSCAM
cellular response to nitrogen compound (GO:1901699)	1/15	0.170746	0.413441	0.167288	0.396608	-1.96959	3.48141	AOC1
regulation of transferase activity (GO:0051338)	1/15	0.170746	0.413441	0.167288	0.396608	-1.9686	3.47966	EMP2
positive regulation of cell development (GO:0010720)	2/35	0.0697486	0.404225	0.0660607	0.391203	-1.30625	3.47837	PROX1;FAM129B
negative regulation of endoplasmic reticulum stress-induced intrinsic apoptotic signaling pathway (GO:1902236)	1/15	0.170746	0.413441	0.167288	0.396608	-1.96692	3.47668	HSPA1A
regulation of centriole replication (GO:0046599)	1/16	0.181036	0.413441	0.176767	0.396608	-2.03314	3.47475	STIL
maintenance of gastrointestinal epithelium (GO:0030277)	1/14	0.160327	0.413441	0.1577	0.396608	-1.89727	3.47303	INAVA
regulation of mitotic sister chromatid separation (GO:0010965)	1/16	0.181036	0.413441	0.176767	0.396608	-2.03197	3.47275	UBE2C
axonal fasciculation (GO:0007413)	1/13	0.149777	0.406226	0.148003	0.394234	-1.8247	3.46438	EPHA3
negative regulation of transport (GO:0051051)	2/41	0.091656	0.404225	0.0857521	0.391203	-1.44936	3.46355	LGALS3;EPHA3
positive regulation of cellular catabolic process (GO:0031331)	4/107	0.0442778	0.404225	0.0378457	0.378203	-1.10986	3.45974	SH3BP4;ADAM8;RNF152;OPTN
regulation of amyloid precursor protein biosynthetic process (GO:0042984)	1/10	0.11733	0.404225	0.118241	0.391203	-1.60885	3.4474	BACE2
macrophage chemotaxis (GO:0048246)	1/11	0.12828	0.404225	0.128275	0.391203	-1.67752	3.44484	LGALS3
skeletal myofibril assembly (GO:0014866)	1/13	0.149777	0.406226	0.148003	0.394234	-1.80973	3.43596	PROX1
positive regulation of alpha-beta T cell proliferation (GO:0046641)	1/14	0.160327	0.413441	0.1577	0.396608	-1.8728	3.42824	CCR2
regulation of interferon-gamma production (GO:0032649)	2/44	0.103265	0.404225	0.0961798	0.391203	-1.50967	3.42765	CCR2;HAVCR2
positive regulation of actin nucleation (GO:0051127)	1/14	0.160327	0.413441	0.1577	0.396608	-1.86477	3.41354	SCIN
regulation of sodium ion transport (GO:0002028)	2/36	0.0732663	0.404225	0.0692253	0.391203	-1.30557	3.41231	ANK3;SCN4B
negative regulation of blood vessel morphogenesis (GO:2000181)	3/66	0.0487239	0.404225	0.0438486	0.386567	-1.12926	3.41215	STAB1;FAM129B;CCR2
peptidyl-arginine modification (GO:0018195)	1/13	0.149777	0.406226	0.148003	0.394234	-1.79483	3.40768	PADI2
regulation of cell growth (GO:0001558)	6/202	0.0404602	0.393303	0.0316644	0.356332	-1.06033	3.40096	PSRC1;CDKN2A;ERBB2;SH3BP4;IL17RB;HSPA1A
nonribosomal peptide biosynthetic process (GO:0019184)	1/13	0.149777	0.406226	0.148003	0.394234	-1.78909	3.39678	CHAC1
response to steroid hormone (GO:0048545)	2/38	0.0804676	0.404225	0.0756996	0.391203	-1.34613	3.3921	TGFB3;MGARP
positive regulation of stress fiber assembly (GO:0051496)	2/38	0.0804676	0.404225	0.0756996	0.391203	-1.34438	3.38771	CARMIL1;TGFB3
cell differentiation in hindbrain (GO:0021533)	1/13	0.149777	0.406226	0.148003	0.394234	-1.78326	3.38572	PROX1
negative regulation of hemopoiesis (GO:1903707)	1/15	0.170746	0.413441	0.167288	0.396608	-1.91352	3.3823	MEIS1
mitotic spindle midzone assembly (GO:0051256)	1/11	0.12828	0.404225	0.128275	0.391203	-1.64672	3.38161	AURKB
regulation of telomerase activity (GO:0051972)	2/43	0.0993515	0.404225	0.0926645	0.391203	-1.46161	3.37499	NEK2;AURKB
glutathione biosynthetic process (GO:0006750)	1/12	0.139096	0.404225	0.138195	0.391203	-1.69756	3.34861	CHAC1
regulation of leukocyte migration (GO:0002685)	1/14	0.160327	0.413441	0.1577	0.396608	-1.82924	3.34851	MADCAM1
positive regulation of cell migration involved in sprouting angiogenesis (GO:0090050)	1/17	0.1912	0.417443	0.186138	0.398791	-2.02073	3.34317	JCAD
cAMP biosynthetic process (GO:0006171)	1/15	0.170746	0.413441	0.167288	0.396608	-1.88047	3.32388	ADCY4
catecholamine biosynthetic process (GO:0042423)	1/14	0.160327	0.413441	0.1577	0.396608	-1.81474	3.32196	AOC1
smooth muscle contraction (GO:0006939)	1/15	0.170746	0.413441	0.167288	0.396608	-1.87728	3.31825	NMUR1
nitric oxide metabolic process (GO:0046209)	1/13	0.149777	0.406226	0.148003	0.394234	-1.74473	3.31256	NQO1
positive regulation of actin filament bundle assembly (GO:0032233)	2/45	0.10722	0.404225	0.0997327	0.391203	-1.47864	3.30161	CARMIL1;TGFB3
modified amino acid transport (GO:0072337)	1/15	0.170746	0.413441	0.167288	0.396608	-1.85939	3.28661	SLC1A4
positive regulation of SMAD protein import into nucleus (GO:0060391)	1/13	0.149777	0.406226	0.148003	0.394234	-1.7266	3.27814	TGFB3
regulation of protein modification by small protein conjugation or removal (GO:1903320)	1/15	0.170746	0.413441	0.167288	0.396608	-1.85176	3.27313	HSPA1A
regulation of delayed rectifier potassium channel activity (GO:1902259)	1/16	0.181036	0.413441	0.176767	0.396608	-1.90398	3.25402	ANK3
myelination in peripheral nervous system (GO:0022011)	1/14	0.160327	0.413441	0.1577	0.396608	-1.77579	3.25067	CNTNAP1
phospholipase C-activating dopamine receptor signaling pathway (GO:0060158)	1/14	0.160327	0.413441	0.1577	0.396608	-1.77317	3.24587	GNA15
pancreas development (GO:0031016)	1/15	0.170746	0.413441	0.167288	0.396608	-1.83343	3.24074	PROX1
peptidyl-tyrosine phosphorylation (GO:0018108)	3/80	0.0773112	0.404225	0.0686777	0.391203	-1.26153	3.22942	BLK;SRMS;EPHA3
negative regulation of TOR signaling (GO:0032007)	2/41	0.091656	0.404225	0.0857521	0.391203	-1.34969	3.22537	SH3BP4;RNF152
positive regulation of defense response (GO:0031349)	3/75	0.066398	0.404225	0.0591996	0.391203	-1.18861	3.22361	ADAM8;OPTN;CCR2
G-protein coupled acetylcholine receptor signaling pathway (GO:0007213)	1/17	0.1912	0.417443	0.186138	0.398791	-1.94545	3.21863	GNA15
regulation of mitotic metaphase/anaphase transition (GO:0030071)	1/16	0.181036	0.413441	0.176767	0.396608	-1.88257	3.21741	UBE2C
negative regulation of interleukin-2 production (GO:0032703)	1/16	0.181036	0.413441	0.176767	0.396608	-1.8809	3.21457	HAVCR2
regulation of receptor recycling (GO:0001919)	1/18	0.201237	0.41908	0.195404	0.399665	-2.00233	3.21027	OPTN
peptidyl-tyrosine autophosphorylation (GO:0038083)	2/46	0.111216	0.404225	0.103322	0.391203	-1.46166	3.21023	BLK;SRMS
positive regulation of macrophage activation (GO:0043032)	1/18	0.201237	0.41908	0.195404	0.399665	-1.99718	3.20202	ITGAM
urate metabolic process (GO:0046415)	1/12	0.139096	0.404225	0.138195	0.391203	-1.61958	3.19478	CARMIL1
mesenchymal cell differentiation (GO:0048762)	2/42	0.0954813	0.404225	0.0891882	0.391203	-1.35759	3.18875	SNAI2;S100A4
regulation of superoxide anion generation (GO:0032928)	1/14	0.160327	0.413441	0.1577	0.396608	-1.74039	3.18586	ITGAM
striated muscle myosin thick filament assembly (GO:0071688)	1/14	0.160327	0.413441	0.1577	0.396608	-1.73524	3.17644	OBSL1
regulation of interleukin-1 beta production (GO:0032651)	1/14	0.160327	0.413441	0.1577	0.396608	-1.71674	3.14257	INAVA
positive regulation of cell proliferation (GO:0008284)	9/425	0.0836354	0.404225	0.0599485	0.391203	-1.26466	3.13799	ESM1;SAPCD2;RTKN2;ERBB2;S100A6;RBPMS2;BIRC5;EMP2;PROX1
negative regulation of sequence-specific DNA binding transcription factor activity (GO:0043433)	4/141	0.0986548	0.404225	0.0835867	0.391203	-1.35021	3.12726	CDKN2A;PROX1;GLIS2;HAVCR2
brain development (GO:0007420)	4/120	0.0624095	0.404225	0.0530455	0.391203	-1.12485	3.12038	CENPF;PROX1;DSCAML1;SHROOM4
negative regulation of cell growth (GO:0030308)	4/116	0.0564688	0.404225	0.0480615	0.391203	-1.08544	3.11963	PSRC1;CDKN2A;SH3BP4;HSPA1A
negative regulation of TORC1 signaling (GO:1904262)	1/16	0.181036	0.413441	0.176767	0.396608	-1.82517	3.11932	RNF152
nucleoside salvage (GO:0043174)	1/15	0.170746	0.413441	0.167288	0.396608	-1.76462	3.1191	TK1
positive regulation of myotube differentiation (GO:0010831)	1/17	0.1912	0.417443	0.186138	0.398791	-1.8821	3.11382	FAM129B
hexose catabolic process (GO:0019320)	1/10	0.11733	0.404225	0.118241	0.391203	-1.44947	3.10588	TKTL1
response to unfolded protein (GO:0006986)	2/44	0.103265	0.404225	0.0961798	0.391203	-1.36413	3.09721	OPTN;HSPA1A
endothelial cell differentiation (GO:0045446)	1/14	0.160327	0.413441	0.1577	0.396608	-1.69009	3.09379	PROX1
thymus development (GO:0048538)	1/15	0.170746	0.413441	0.167288	0.396608	-1.74637	3.08684	AIRE
fluid transport (GO:0042044)	1/15	0.170746	0.413441	0.167288	0.396608	-1.73452	3.0659	AQP4
negative regulation of apoptotic process (GO:0043066)	11/486	0.0406665	0.393303	0.0266958	0.339744	-0.953003	3.05185	PRKCG;LTK;STIL;TGFB3;ERBB2;BIRC5;SNAI2;ADAM8;EPHA3;FAM129B;HSPA1A
establishment of mitotic spindle orientation (GO:0000132)	1/15	0.170746	0.413441	0.167288	0.396608	-1.7231	3.04572	SAPCD2
negative regulation of cytokine production involved in immune response (GO:0002719)	1/16	0.181036	0.413441	0.176767	0.396608	-1.77527	3.03403	TGFB3
cardiac atrium morphogenesis (GO:0003209)	1/18	0.201237	0.41908	0.195404	0.399665	-1.89004	3.03024	PROX1
mitotic nuclear envelope disassembly (GO:0007077)	2/45	0.10722	0.404225	0.0997327	0.391203	-1.35624	3.0283	CCNB2;LMNA
negative regulation of chromatin silencing (GO:0031936)	1/10	0.11733	0.404225	0.118241	0.391203	-1.40791	3.01683	AICDA
neural crest cell differentiation (GO:0014033)	1/16	0.181036	0.413441	0.176767	0.396608	-1.7608	3.00931	SNAI2
pyrimidine nucleoside biosynthetic process (GO:0046134)	1/16	0.181036	0.413441	0.176767	0.396608	-1.75934	3.00681	TK1
positive regulation of tumor necrosis factor production (GO:0032760)	2/48	0.11932	0.404225	0.110604	0.391203	-1.41348	3.00499	CCR2;HAVCR2
negative regulation of response to stimulus (GO:0048585)	4/128	0.0752347	0.404225	0.063824	0.391203	-1.15996	3.00097	LTK;SRMS;ERBB2;EPHA3
cellular response to oxygen-containing compound (GO:1901701)	7/275	0.0561229	0.404225	0.0423983	0.380682	-1.03678	2.98614	WNT10B;LTK;AOC1;SH3BP4;CIB2;CCR5;EPHA3
positive regulation of collagen metabolic process (GO:0010714)	1/16	0.181036	0.413441	0.176767	0.396608	-1.74562	2.98336	TGFB3
negative regulation of DNA replication (GO:0008156)	1/17	0.1912	0.417443	0.186138	0.398791	-1.80041	2.97867	TGFB3
extracellular matrix disassembly (GO:0022617)	3/79	0.0750688	0.404225	0.0667297	0.391203	-1.14902	2.97521	SH3PXD2B;LAMA3;ADAM8
myotube differentiation (GO:0014902)	1/16	0.181036	0.413441	0.176767	0.396608	-1.73766	2.96975	ADAM12
positive regulation of membrane protein ectodomain proteolysis (GO:0051044)	1/16	0.181036	0.413441	0.176767	0.396608	-1.72652	2.95072	ADAM8
regulation of cell-substrate junction assembly (GO:0090109)	1/16	0.181036	0.413441	0.176767	0.396608	-1.72181	2.94268	EPHA3
hexose transport (GO:0008645)	1/17	0.1912	0.417443	0.186138	0.398791	-1.77739	2.94058	SLC2A6
water transport (GO:0006833)	1/14	0.160327	0.413441	0.1577	0.396608	-1.60322	2.93476	AQP4
regulation of T cell activation (GO:0050863)	2/45	0.10722	0.404225	0.0997327	0.391203	-1.31304	2.93184	LGALS3;CCR2
regulation of secretion (GO:0051046)	1/15	0.170746	0.413441	0.167288	0.396608	-1.65783	2.93034	SCIN
membrane depolarization (GO:0051899)	2/44	0.103265	0.404225	0.0961798	0.391203	-1.29024	2.92944	CACNA1I;CACNA1G
regulation of exit from mitosis (GO:0007096)	1/16	0.181036	0.413441	0.176767	0.396608	-1.70973	2.92203	UBE2C
negative regulation of neuron death (GO:1901215)	3/84	0.0865696	0.404225	0.0767238	0.391203	-1.19378	2.92096	PRKCG;TGFB3;ADAM8
mesenchymal cell development (GO:0014031)	1/16	0.181036	0.413441	0.176767	0.396608	-1.7053	2.91445	SNAI2
pyrimidine-containing compound salvage (GO:0008655)	1/13	0.149777	0.406226	0.148003	0.394234	-1.53148	2.90768	TK1
regulation of keratinocyte proliferation (GO:0010837)	1/19	0.211151	0.425445	0.204564	0.403439	-1.86956	2.90751	SNAI2
cation transport (GO:0006812)	3/80	0.0773112	0.404225	0.0686777	0.391203	-1.13479	2.90497	SLC36A3;TMEM63C;SLC1A4
cardiac muscle cell differentiation (GO:0055007)	1/16	0.181036	0.413441	0.176767	0.396608	-1.69629	2.89905	PROX1
substrate-dependent cell migration (GO:0006929)	1/16	0.181036	0.413441	0.176767	0.396608	-1.69497	2.89681	ITGA11
stem cell development (GO:0048864)	1/15	0.170746	0.413441	0.167288	0.396608	-1.63823	2.89571	SNAI2
negative regulation of extrinsic apoptotic signaling pathway (GO:2001237)	3/77	0.0706729	0.404225	0.0629118	0.391203	-1.08798	2.88281	LGALS3;SNAI2;HSPA1A
activation of protein kinase activity (GO:0032147)	6/234	0.0719297	0.404225	0.0564769	0.391203	-1.09406	2.87965	ADCY4;MAP3K20;EMP2;MUC20;DUSP9;INAVA
positive regulation of alpha-beta T cell activation (GO:0046635)	1/16	0.181036	0.413441	0.176767	0.396608	-1.68323	2.87673	CCR2
hyaluronan catabolic process (GO:0030214)	1/17	0.1912	0.417443	0.186138	0.398791	-1.73327	2.86758	HMMR
regulation of protein targeting to mitochondrion (GO:1903214)	3/89	0.0987648	0.404225	0.0873342	0.391203	-1.23503	2.85911	ABLIM3;NMUR1;IL9R
nitric oxide mediated signal transduction (GO:0007263)	1/16	0.181036	0.413441	0.176767	0.396608	-1.67051	2.855	KLRG1
regulation of cyclin-dependent protein serine/threonine kinase activity involved in G1/S transition of mitotic cell cycle (GO:0031657)	1/15	0.170746	0.413441	0.167288	0.396608	-1.60533	2.83754	CDKN2A
digestive tract morphogenesis (GO:0048546)	1/16	0.181036	0.413441	0.176767	0.396608	-1.66029	2.83753	RBPMS2
purine-containing compound catabolic process (GO:0072523)	1/15	0.170746	0.413441	0.167288	0.396608	-1.60088	2.82969	GDA
positive regulation of acute inflammatory response (GO:0002675)	1/16	0.181036	0.413441	0.176767	0.396608	-1.65038	2.8206	ADAM8
regulation of bicellular tight junction assembly (GO:2000810)	1/17	0.1912	0.417443	0.186138	0.398791	-1.69409	2.80277	SNAI2
establishment of protein localization to membrane (GO:0090150)	3/84	0.0865696	0.404225	0.0767238	0.391203	-1.14132	2.79259	RAB26;ANK3;OPTN
positive regulation of immune system process (GO:0002684)	1/17	0.1912	0.417443	0.186138	0.398791	-1.68679	2.79069	MADCAM1
activation of MAPK activity (GO:0000187)	4/118	0.0593993	0.404225	0.0505195	0.391203	-0.984912	2.78087	MAP3K20;MUC20;DUSP9;INAVA
positive regulation of neural precursor cell proliferation (GO:2000179)	1/15	0.170746	0.413441	0.167288	0.396608	-1.57208	2.77877	PROX1
regulation of cardiac muscle cell membrane repolarization (GO:0099623)	1/19	0.211151	0.425445	0.204564	0.403439	-1.78665	2.77856	SCN4B
protein K48-linked ubiquitination (GO:0070936)	2/49	0.123426	0.404225	0.114295	0.391203	-1.32747	2.77722	UBE2C;RNF152
positive regulation of interleukin-4 production (GO:0032753)	1/16	0.181036	0.413441	0.176767	0.396608	-1.62449	2.77635	HAVCR2
nuclear envelope reassembly (GO:0031468)	1/19	0.211151	0.425445	0.204564	0.403439	-1.77567	2.76149	LMNA
mitotic spindle assembly (GO:0090307)	2/47	0.115249	0.404225	0.106946	0.391203	-1.27672	2.75855	BIRC5;AURKB
positive regulation of osteoclast differentiation (GO:0045672)	1/15	0.170746	0.413441	0.167288	0.396608	-1.55954	2.75661	CCR1
macrophage activation (GO:0042116)	1/18	0.201237	0.41908	0.195404	0.399665	-1.71896	2.75596	ITGAM
protein localization to plasma membrane (GO:0072659)	4/131	0.0803617	0.404225	0.068141	0.391203	-1.09148	2.75186	RAB26;EMP2;ANK3;OPTN
response to ATP (GO:0033198)	1/15	0.170746	0.413441	0.167288	0.396608	-1.5565	2.75123	CIB2
positive regulation of protein secretion (GO:0050714)	3/83	0.0842124	0.404225	0.0746746	0.391203	-1.10977	2.74602	BLK;TGFB3;ADAM8
regulation of chemokine production (GO:0032642)	1/19	0.211151	0.425445	0.204564	0.403439	-1.76485	2.74466	SNAI2
response to cholesterol (GO:0070723)	1/16	0.181036	0.413441	0.176767	0.396608	-1.60368	2.74077	CCR5
hemidesmosome assembly (GO:0031581)	1/12	0.139096	0.404225	0.138195	0.391203	-1.38419	2.73045	LAMA3
regulation of cell junction assembly (GO:1901888)	1/16	0.181036	0.413441	0.176767	0.396608	-1.59759	2.73037	SNAI2
regulation of mitochondrial outer membrane permeabilization involved in apoptotic signaling pathway (GO:1901028)	1/18	0.201237	0.41908	0.195404	0.399665	-1.69274	2.71392	HSPA1A
selective autophagy (GO:0061912)	1/16	0.181036	0.413441	0.176767	0.396608	-1.58622	2.71093	STBD1
positive regulation of stress-activated protein kinase signaling cascade (GO:0070304)	1/16	0.181036	0.413441	0.176767	0.396608	-1.58325	2.70586	INAVA
calcium ion homeostasis (GO:0055074)	3/88	0.0962724	0.404225	0.0851644	0.391203	-1.15576	2.70515	CCR1;CIB2;CCR2
positive regulation of secretion (GO:0051047)	1/17	0.1912	0.417443	0.186138	0.398791	-1.63346	2.70246	SCIN
insulin secretion (GO:0030073)	1/19	0.211151	0.425445	0.204564	0.403439	-1.73738	2.70194	KLRG1
regulation of actin nucleation (GO:0051125)	1/17	0.1912	0.417443	0.186138	0.398791	-1.63257	2.70098	SCIN
regulation of cell aging (GO:0090342)	1/14	0.160327	0.413441	0.1577	0.396608	-1.4738	2.69785	LMNA
regulation of cellular response to transforming growth factor beta stimulus (GO:1903844)	1/19	0.211151	0.425445	0.204564	0.403439	-1.73443	2.69736	DKK3
protein localization to organelle (GO:0033365)	3/98	0.122317	0.404225	0.107876	0.391203	-1.28177	2.69317	LMNA;OBSL1;OPTN
regulation of G2/M transition of mitotic cell cycle (GO:0010389)	4/150	0.116621	0.404225	0.0988269	0.391203	-1.2522	2.69076	CENPF;NEK2;HMMR;NINL
substantia nigra development (GO:0021762)	2/44	0.103265	0.404225	0.0961798	0.391203	-1.18305	2.68606	PADI2;SYNGR3
cellular response to lipid (GO:0071396)	5/179	0.0725311	0.404225	0.0590908	0.391203	-1.02013	2.67656	WNT10B;LTK;MGARP;CCR5;EPHA3
negative regulation of DNA damage response, signal transduction by p53 class mediator (GO:0043518)	1/13	0.149777	0.406226	0.148003	0.394234	-1.40631	2.67002	SNAI2
amino acid transport (GO:0006865)	2/49	0.123426	0.404225	0.114295	0.391203	-1.27544	2.66836	SLC36A3;SLC1A4
regulation of SMAD protein import into nucleus (GO:0060390)	1/17	0.1912	0.417443	0.186138	0.398791	-1.61088	2.6651	TGFB3
cardiac epithelial to mesenchymal transition (GO:0060317)	1/17	0.1912	0.417443	0.186138	0.398791	-1.60601	2.65704	SNAI2
positive regulation of organelle assembly (GO:1902117)	2/48	0.11932	0.404225	0.110604	0.391203	-1.2449	2.6466	SPAG5;PROX1
mitotic DNA integrity checkpoint (GO:0044774)	1/14	0.160327	0.413441	0.1577	0.396608	-1.44212	2.63987	TOP2A
positive regulation of supramolecular fiber organization (GO:1902905)	3/85	0.0889545	0.404225	0.0787976	0.391203	-1.08114	2.61596	CARMIL1;PSRC1;PROX1
regulation of transposition (GO:0010528)	1/18	0.201237	0.41908	0.195404	0.399665	-1.62861	2.6111	AICDA
leukocyte adhesion to vascular endothelial cell (GO:0061756)	1/17	0.1912	0.417443	0.186138	0.398791	-1.57493	2.60562	MADCAM1
adenylate cyclase-modulating G-protein coupled receptor signaling pathway (GO:0007188)	4/135	0.0874601	0.404225	0.0741264	0.391203	-1.06927	2.60536	GNA15;CYSLTR1;ADCY4;CCR3
regulation of intrinsic apoptotic signaling pathway in response to DNA damage (GO:1902229)	1/17	0.1912	0.417443	0.186138	0.398791	-1.55029	2.56486	SNAI2
cellular response to gamma radiation (GO:0071480)	1/18	0.201237	0.41908	0.195404	0.399665	-1.5992	2.56395	MAP3K20
regulation of bone mineralization (GO:0030500)	2/51	0.131738	0.404225	0.121769	0.391203	-1.2577	2.54929	CCR1;TGFB3
purine-containing compound metabolic process (GO:0072521)	1/18	0.201237	0.41908	0.195404	0.399665	-1.58819	2.54629	CARMIL1
positive regulation of protein processing (GO:0010954)	1/18	0.201237	0.41908	0.195404	0.399665	-1.58295	2.5379	ADAM8
post-translational protein modification (GO:0043687)	8/358	0.0785543	0.404225	0.0578733	0.391203	-0.99385	2.52832	LGALS1;FBXO27;TMEM132A;IGFBP7;LMO7;ESCO2;OBSL1;FBXO44
negative regulation of anoikis (GO:2000811)	1/16	0.181036	0.413441	0.176767	0.396608	-1.47754	2.52521	SNAI2
leukocyte tethering or rolling (GO:0050901)	1/17	0.1912	0.417443	0.186138	0.398791	-1.52586	2.52444	MADCAM1
toll-like receptor 4 signaling pathway (GO:0034142)	1/16	0.181036	0.413441	0.176767	0.396608	-1.47288	2.51724	ITGAM
positive regulation of ERK1 and ERK2 cascade (GO:0070374)	5/202	0.107186	0.404225	0.0875742	0.391203	-1.12647	2.51562	CCR1;LTK;ERBB2;NPNT;EPHA3
positive regulation of striated muscle cell differentiation (GO:0051155)	1/18	0.201237	0.41908	0.195404	0.399665	-1.56718	2.51262	PROX1
vitamin D metabolic process (GO:0042359)	1/16	0.181036	0.413441	0.176767	0.396608	-1.46685	2.50693	CUBN
negative regulation of intracellular transport (GO:0032387)	1/18	0.201237	0.41908	0.195404	0.399665	-1.56177	2.50394	HSPA1A
ureteric bud development (GO:0001657)	1/18	0.201237	0.41908	0.195404	0.399665	-1.5581	2.49806	NPNT
negative regulation of lymphocyte activation (GO:0051250)	1/20	0.220942	0.430606	0.213621	0.410638	-1.64374	2.48181	LGALS3
positive regulation of secretion by cell (GO:1903532)	2/53	0.140174	0.404225	0.12936	0.391203	-1.26137	2.47843	TGFB3;ADAM8
negative regulation of T cell receptor signaling pathway (GO:0050860)	1/15	0.170746	0.413441	0.167288	0.396608	-1.40112	2.47659	LGALS3
regulation of antigen receptor-mediated signaling pathway (GO:0050854)	1/13	0.149777	0.406226	0.148003	0.394234	-1.30437	2.47648	BLK
inhibition of cysteine-type endopeptidase activity (GO:0097340)	1/16	0.181036	0.413441	0.176767	0.396608	-1.44751	2.47387	BIRC5
response to organonitrogen compound (GO:0010243)	2/52	0.135941	0.404225	0.12555	0.391203	-1.23952	2.4735	KYNU;INAVA
negative regulation of viral genome replication (GO:0045071)	2/51	0.131738	0.404225	0.121769	0.391203	-1.21911	2.47107	PROX1;AICDA
regulation of collagen biosynthetic process (GO:0032965)	1/18	0.201237	0.41908	0.195404	0.399665	-1.53316	2.45807	TGFB3
regulation of calcium ion-dependent exocytosis (GO:0017158)	2/54	0.144435	0.406226	0.133196	0.391203	-1.26953	2.45645	CACNA1I;CACNA1G
branching involved in ureteric bud morphogenesis (GO:0001658)	1/21	0.230612	0.437428	0.222576	0.41427	-1.67099	2.45137	NPNT
positive regulation of transporter activity (GO:0032411)	1/15	0.170746	0.413441	0.167288	0.396608	-1.38333	2.44514	SYNGR3
actin filament polymerization (GO:0030041)	1/19	0.211151	0.425445	0.204564	0.403439	-1.5704	2.44227	COBL
negative regulation of cellular biosynthetic process (GO:0031327)	2/48	0.11932	0.404225	0.110604	0.391203	-1.14792	2.44041	SNAI2;PROX1
regulation of telomere maintenance via telomerase (GO:0032210)	2/52	0.135941	0.404225	0.12555	0.391203	-1.21986	2.43428	NEK2;AURKB
negative regulation of proteolysis involved in cellular protein catabolic process (GO:1903051)	1/20	0.220942	0.430606	0.213621	0.410638	-1.59917	2.41451	PRKCG
regulation of B cell receptor signaling pathway (GO:0050855)	1/18	0.201237	0.41908	0.195404	0.399665	-1.50382	2.41102	BLK
cyclic nucleotide biosynthetic process (GO:0009190)	1/20	0.220942	0.430606	0.213621	0.410638	-1.59135	2.4027	ADCY4
regulation of neuron apoptotic process (GO:0043523)	3/90	0.101283	0.404225	0.0895272	0.391203	-1.04858	2.40107	PRKCG;TGFB3;ADAM8
positive regulation of mRNA processing (GO:0050685)	1/17	0.1912	0.417443	0.186138	0.398791	-1.45103	2.40063	HSPA1A
regulation of interleukin-4 production (GO:0032673)	1/16	0.181036	0.413441	0.176767	0.396608	-1.3993	2.39148	HAVCR2
cellular protein modification process (GO:0006464)	17/1002	0.118883	0.404225	0.0718169	0.391203	-1.12046	2.38615	PRKCG;LTK;FBXO27;TMEM132A;LMO7;FBXO44;DUSP9;AURKB;FUT7;LGALS1;ERBB2;MAP3K20;BIRC5;NEK2;IGFBP7;FBXL2;OBSL1
negative regulation of phosphoprotein phosphatase activity (GO:0032515)	1/18	0.201237	0.41908	0.195404	0.399665	-1.48473	2.38042	PPP4R4
ruffle organization (GO:0031529)	1/17	0.1912	0.417443	0.186138	0.398791	-1.43741	2.3781	CARMIL1
negative regulation of protein localization to cell periphery (GO:1904376)	1/20	0.220942	0.430606	0.213621	0.410638	-1.57432	2.37699	SAPCD2
regulation of interferon-alpha production (GO:0032647)	1/17	0.1912	0.417443	0.186138	0.398791	-1.4336	2.3718	HAVCR2
cellular response to inorganic substance (GO:0071241)	1/18	0.201237	0.41908	0.195404	0.399665	-1.4788	2.37092	AOC1
negative regulation of protein dephosphorylation (GO:0035308)	1/19	0.211151	0.425445	0.204564	0.403439	-1.52151	2.36622	PPP4R4
negative regulation of protein ubiquitination (GO:0031397)	2/51	0.131738	0.404225	0.121769	0.391203	-1.16159	2.35448	PRKCG;HSPA1A
metal ion homeostasis (GO:0055065)	2/46	0.111216	0.404225	0.103322	0.391203	-1.06808	2.34581	CIB2;ANK3
regulation of cartilage development (GO:0061035)	1/16	0.181036	0.413441	0.176767	0.396608	-1.36886	2.33947	SCIN
plasma membrane bounded cell projection morphogenesis (GO:0120039)	2/53	0.140174	0.404225	0.12936	0.391203	-1.1894	2.33702	CNTNAP1;NBL1
morphogenesis of an epithelium (GO:0002009)	1/20	0.220942	0.430606	0.213621	0.410638	-1.54455	2.33205	AIRE
regulation of anoikis (GO:2000209)	1/21	0.230612	0.437428	0.222576	0.41427	-1.58756	2.32899	SNAI2
negative regulation of smoothened signaling pathway (GO:0045879)	1/20	0.220942	0.430606	0.213621	0.410638	-1.54166	2.32769	GLIS2
regulation of MAPK cascade (GO:0043408)	5/204	0.110527	0.404225	0.0903396	0.391203	-1.05539	2.3245	LTK;TGFB3;ERBB2;EPHA3;JCAD
cell projection assembly (GO:0030031)	1/21	0.230612	0.437428	0.222576	0.41427	-1.57375	2.30873	RHOV
transmembrane receptor protein tyrosine kinase signaling pathway (GO:0007169)	8/397	0.121997	0.404225	0.0913583	0.391203	-1.09535	2.30435	BLK;FGF16;SRMS;ARHGEF28;ERBB2;MUC20;SHCBP1;EPHA3
positive regulation of response to biotic stimulus (GO:0002833)	1/18	0.201237	0.41908	0.195404	0.399665	-1.4323	2.29636	OPTN
negative regulation of transposition (GO:0010529)	1/20	0.220942	0.430606	0.213621	0.410638	-1.51104	2.28144	AICDA
positive regulation of T cell migration (GO:2000406)	1/21	0.230612	0.437428	0.222576	0.41427	-1.554	2.27974	CCR2
negative regulation of phosphate metabolic process (GO:0045936)	1/20	0.220942	0.430606	0.213621	0.410638	-1.50002	2.26481	CDKN2A
positive regulation of ossification (GO:0045778)	2/53	0.140174	0.404225	0.12936	0.391203	-1.14788	2.25544	TGFB3;NPNT
aromatic amino acid family catabolic process (GO:0009074)	1/21	0.230612	0.437428	0.222576	0.41427	-1.53112	2.24618	KYNU
covalent chromatin modification (GO:0016569)	1/21	0.230612	0.437428	0.222576	0.41427	-1.51762	2.22637	AURKB
purine nucleotide catabolic process (GO:0006195)	1/15	0.170746	0.413441	0.167288	0.396608	-1.25683	2.22155	GDA
cellular response to organonitrogen compound (GO:0071417)	3/98	0.122317	0.404225	0.107876	0.391203	-1.05652	2.2199	AOC1;SH3BP4;CIB2
regulation of BMP signaling pathway (GO:0030510)	2/57	0.157373	0.413441	0.144854	0.394234	-1.19985	2.21869	RBPMS2;NBL1
regulation of adherens junction organization (GO:1903391)	1/19	0.211151	0.425445	0.204564	0.403439	-1.42638	2.21829	EPHA3
positive regulation of cell migration (GO:0030335)	5/222	0.14278	0.406226	0.117211	0.391203	-1.13937	2.21773	CCR1;CARMIL1;SNAI2;MADCAM1;CCR2
axon development (GO:0061564)	3/95	0.11425	0.404225	0.100832	0.391203	-1.02226	2.21765	S100A6;ANK3;DSCAML1
positive regulation of immune response (GO:0050778)	2/55	0.148722	0.406226	0.137057	0.391203	-1.14997	2.19147	ITGAM;ADAM8
positive regulation of actin filament polymerization (GO:0030838)	2/52	0.135941	0.404225	0.12555	0.391203	-1.09587	2.18684	CARMIL1;SCIN
negative regulation of protein processing (GO:0010955)	1/16	0.181036	0.413441	0.176767	0.396608	-1.27842	2.18489	CHAC1
mesonephric tubule development (GO:0072164)	1/18	0.201237	0.41908	0.195404	0.399665	-1.36134	2.1826	NPNT
muscle tissue morphogenesis (GO:0060415)	1/20	0.220942	0.430606	0.213621	0.410638	-1.44537	2.1823	PROX1
membrane protein ectodomain proteolysis (GO:0006509)	1/19	0.211151	0.425445	0.204564	0.403439	-1.40222	2.1807	BACE2
regulation of lymphocyte proliferation (GO:0050670)	1/16	0.181036	0.413441	0.176767	0.396608	-1.27493	2.17892	LGALS3
glucan catabolic process (GO:0009251)	1/19	0.211151	0.425445	0.204564	0.403439	-1.40065	2.17827	STBD1
regulation of ERBB signaling pathway (GO:1901184)	1/23	0.249595	0.447228	0.240182	0.424236	-1.55981	2.16488	ERBB2
phospholipase C-activating G-protein coupled receptor signaling pathway (GO:0007200)	3/92	0.106396	0.404225	0.0939821	0.391203	-0.964711	2.16152	GNA15;CYSLTR1;NMUR1
eye morphogenesis (GO:0048592)	1/21	0.230612	0.437428	0.222576	0.41427	-1.47236	2.15999	ALDH1A3
regulation of lamellipodium organization (GO:1902743)	1/18	0.201237	0.41908	0.195404	0.399665	-1.346	2.158	CARMIL1
vesicle-mediated transport between endosomal compartments (GO:0098927)	1/24	0.258911	0.455157	0.248836	0.431335	-1.59558	2.15607	EMP2
ureteric bud morphogenesis (GO:0060675)	1/21	0.230612	0.437428	0.222576	0.41427	-1.46771	2.15316	NPNT
inositol phosphate-mediated signaling (GO:0048016)	1/21	0.230612	0.437428	0.222576	0.41427	-1.46481	2.14891	NMUR1
positive regulation of interleukin-10 production (GO:0032733)	1/23	0.249595	0.447228	0.240182	0.424236	-1.54153	2.13951	INAVA
vitamin transport (GO:0051180)	1/24	0.258911	0.455157	0.248836	0.431335	-1.57829	2.1327	CUBN
protein complex localization (GO:0031503)	1/23	0.249595	0.447228	0.240182	0.424236	-1.53003	2.12356	BIRC5
positive regulation of lamellipodium organization (GO:1902745)	1/22	0.240162	0.445332	0.231429	0.422301	-1.48683	2.12088	CARMIL1
regulation of endoplasmic reticulum stress-induced intrinsic apoptotic signaling pathway (GO:1902235)	1/21	0.230612	0.437428	0.222576	0.41427	-1.44227	2.11583	HSPA1A
ventricular septum morphogenesis (GO:0060412)	1/22	0.240162	0.445332	0.231429	0.422301	-1.47999	2.11111	PROX1
chromosome organization (GO:0051276)	2/57	0.157373	0.413441	0.144854	0.394234	-1.13778	2.10392	TOP2A;NUF2
positive chemotaxis (GO:0050918)	1/18	0.201237	0.41908	0.195404	0.399665	-1.31221	2.10382	LGALS3
chemokine-mediated signaling pathway (GO:0070098)	2/53	0.140174	0.404225	0.12936	0.391203	-1.06619	2.09493	CCR1;CCR2
early endosome to late endosome transport (GO:0045022)	1/23	0.249595	0.447228	0.240182	0.424236	-1.50595	2.09014	EMP2
regulation of spindle organization (GO:0090224)	1/19	0.211151	0.425445	0.204564	0.403439	-1.34357	2.08949	PSRC1
positive regulation of protein transport (GO:0051222)	2/57	0.157373	0.413441	0.144854	0.394234	-1.1291	2.08786	TGFB3;ADAM8
negative regulation of myeloid cell differentiation (GO:0045638)	1/23	0.249595	0.447228	0.240182	0.424236	-1.49727	2.07808	MEIS1
purine ribonucleotide catabolic process (GO:0009154)	1/20	0.220942	0.430606	0.213621	0.410638	-1.37179	2.0712	PDE4A
hexose transmembrane transport (GO:0035428)	1/20	0.220942	0.430606	0.213621	0.410638	-1.37018	2.06877	SLC2A6
embryonic digit morphogenesis (GO:0042733)	1/17	0.1912	0.417443	0.186138	0.398791	-1.24852	2.06559	MAP3K20
hyaluronan metabolic process (GO:0030212)	1/22	0.240162	0.445332	0.231429	0.422301	-1.44471	2.0608	HMMR
positive regulation of kinase activity (GO:0033674)	3/114	0.168484	0.413441	0.14839	0.394559	-1.15368	2.05461	LTK;ERBB2;EPHA3
regulation of vascular endothelial growth factor receptor signaling pathway (GO:0030947)	1/23	0.249595	0.447228	0.240182	0.424236	-1.47851	2.05204	FAM129B
purine nucleotide metabolic process (GO:0006163)	1/21	0.230612	0.437428	0.222576	0.41427	-1.39317	2.04381	GDA
positive regulation of collagen biosynthetic process (GO:0032967)	1/16	0.181036	0.413441	0.176767	0.396608	-1.1957	2.04353	TGFB3
intracellular estrogen receptor signaling pathway (GO:0030520)	1/20	0.220942	0.430606	0.213621	0.410638	-1.35081	2.03953	PADI2
septin ring organization (GO:0031106)	1/18	0.201237	0.41908	0.195404	0.399665	-1.26485	2.0279	RTKN2
response to progesterone (GO:0032570)	1/21	0.230612	0.437428	0.222576	0.41427	-1.37609	2.01876	TGFB3
STAT cascade (GO:0097696)	1/23	0.249595	0.447228	0.240182	0.424236	-1.45186	2.01505	CCR2
cell morphogenesis involved in neuron differentiation (GO:0048667)	3/98	0.122317	0.404225	0.107876	0.391203	-0.95438	2.00529	S100A6;ANK3;DSCAML1
regulation of viral process (GO:0050792)	1/19	0.211151	0.425445	0.204564	0.403439	-1.28831	2.00356	CHMP4C
histone modification (GO:0016570)	3/99	0.125051	0.404225	0.110266	0.391203	-0.961461	1.99891	CCNA2;PADI2;AURKB
negative regulation of protein import into nucleus (GO:0042308)	1/23	0.249595	0.447228	0.240182	0.424236	-1.43587	1.99286	SNAI2
monocarboxylic acid metabolic process (GO:0032787)	3/109	0.153539	0.413441	0.135236	0.391203	-1.06284	1.99155	ALDH1A3;KYNU;BCO2
phosphatidylinositol-mediated signaling (GO:0048015)	2/57	0.157373	0.413441	0.144854	0.394234	-1.07139	1.98115	LTK;ERBB2
peptide hormone secretion (GO:0030072)	1/26	0.277198	0.4615	0.265851	0.438374	-1.54136	1.97761	KLRG1
DNA ligation (GO:0006266)	1/19	0.211151	0.425445	0.204564	0.403439	-1.26253	1.96347	TOP2A
negative regulation of G2/M transition of mitotic cell cycle (GO:0010972)	2/63	0.183839	0.417281	0.168752	0.396608	-1.15825	1.96172	CHMP4C;AURKB
regulation of viral release from host cell (GO:1902186)	1/26	0.277198	0.4615	0.265851	0.438374	-1.52709	1.9593	CHMP4C
regulation of protein ubiquitination (GO:0031396)	3/102	0.133384	0.404225	0.117557	0.391203	-0.972204	1.95853	PRKCG;INAVA;HSPA1A
regulation of calcium ion import (GO:0090279)	1/23	0.249595	0.447228	0.240182	0.424236	-1.41108	1.95846	LGALS3
chaperone-mediated protein complex assembly (GO:0051131)	1/18	0.201237	0.41908	0.195404	0.399665	-1.21747	1.95193	HSPA1A
positive regulation of cation transmembrane transport (GO:1904064)	1/18	0.201237	0.41908	0.195404	0.399665	-1.21727	1.95161	ANK3
protein localization to membrane (GO:0072657)	4/161	0.140352	0.404225	0.119071	0.391203	-0.992577	1.94903	SH3PXD2B;MADCAM1;EMP2;ANK3
positive regulation of DNA biosynthetic process (GO:2000573)	2/56	0.153036	0.413441	0.140944	0.394234	-1.03825	1.94889	NEK2;AURKB
regulation of catenin import into nucleus (GO:0035412)	1/20	0.220942	0.430606	0.213621	0.410638	-1.28961	1.94712	SNAI2
tetrapyrrole metabolic process (GO:0033013)	1/22	0.240162	0.445332	0.231429	0.422301	-1.36412	1.94583	CUBN
cellular polysaccharide catabolic process (GO:0044247)	1/20	0.220942	0.430606	0.213621	0.410638	-1.28625	1.94206	STBD1
apoptotic nuclear changes (GO:0030262)	1/24	0.258911	0.455157	0.248836	0.431335	-1.43712	1.94194	TOP2A
positive regulation of dendrite morphogenesis (GO:0050775)	1/17	0.1912	0.417443	0.186138	0.398791	-1.17377	1.94193	OBSL1
positive regulation of erythrocyte differentiation (GO:0045648)	1/23	0.249595	0.447228	0.240182	0.424236	-1.39778	1.94	HSPA1A
negative regulation of cyclin-dependent protein kinase activity (GO:1904030)	1/22	0.240162	0.445332	0.231429	0.422301	-1.35913	1.93872	CDKN2A
positive regulation of axon extension (GO:0045773)	1/20	0.220942	0.430606	0.213621	0.410638	-1.27435	1.92409	DSCAM
negative regulation of antigen receptor-mediated signaling pathway (GO:0050858)	1/18	0.201237	0.41908	0.195404	0.399665	-1.19681	1.91882	LGALS3
regulation of cell motility (GO:2000145)	3/110	0.156493	0.413441	0.137833	0.391203	-1.03353	1.91694	LMNA;ERBB2;AMOTL1
embryonic digestive tract development (GO:0048566)	1/21	0.230612	0.437428	0.222576	0.41427	-1.30474	1.91408	RBPMS2
nucleotide catabolic process (GO:0009166)	1/18	0.201237	0.41908	0.195404	0.399665	-1.18363	1.89768	GDA
negative regulation of response to endoplasmic reticulum stress (GO:1903573)	1/23	0.249595	0.447228	0.240182	0.424236	-1.36541	1.89507	HSPA1A
aorta morphogenesis (GO:0035909)	1/17	0.1912	0.417443	0.186138	0.398791	-1.14402	1.89271	PROX1
negative regulation of actin filament polymerization (GO:0030837)	1/23	0.249595	0.447228	0.240182	0.424236	-1.35954	1.88692	SCIN
cobalamin metabolic process (GO:0009235)	1/22	0.240162	0.445332	0.231429	0.422301	-1.3211	1.88447	CUBN
protein homotetramerization (GO:0051289)	2/58	0.161734	0.413441	0.148786	0.394906	-1.03136	1.87893	ALDH1A3;TK1
regulation of membrane protein ectodomain proteolysis (GO:0051043)	1/23	0.249595	0.447228	0.240182	0.424236	-1.35339	1.87839	ADAM8
chaperone mediated protein folding requiring cofactor (GO:0051085)	1/25	0.268111	0.457818	0.257392	0.432569	-1.41854	1.86731	HSPA1A
positive regulation of cell morphogenesis involved in differentiation (GO:0010770)	2/59	0.166116	0.413441	0.15274	0.396608	-1.03335	1.85493	CARMIL1;OBSL1
dopamine metabolic process (GO:0042417)	1/21	0.230612	0.437428	0.222576	0.41427	-1.26041	1.84904	AOC1
positive regulation of neuron projection development (GO:0010976)	3/98	0.122317	0.404225	0.107876	0.391203	-0.879326	1.84759	LTK;COBL;EPHA3
regulation of transcription from RNA polymerase III promoter (GO:0006359)	1/23	0.249595	0.447228	0.240182	0.424236	-1.32764	1.84266	ERBB2
negative regulation of cyclin-dependent protein serine/threonine kinase activity (GO:0045736)	1/25	0.268111	0.457818	0.257392	0.432569	-1.39837	1.84075	CDKN2A
positive regulation of interleukin-2 production (GO:0032743)	1/21	0.230612	0.437428	0.222576	0.41427	-1.25191	1.83658	CCR2
kidney development (GO:0001822)	2/64	0.188313	0.417443	0.172799	0.396608	-1.09786	1.83305	CENPF;PROX1
positive regulation of leukocyte chemotaxis (GO:0002690)	2/62	0.179382	0.413441	0.164721	0.396608	-1.06664	1.83275	CCR1;CCR2
limb development (GO:0060173)	1/25	0.268111	0.457818	0.257392	0.432569	-1.39205	1.83244	MAP3K20
protein localization to cell surface (GO:0034394)	1/23	0.249595	0.447228	0.240182	0.424236	-1.31624	1.82683	EMP2
activation of protein kinase A activity (GO:0034199)	1/17	0.1912	0.417443	0.186138	0.398791	-1.10396	1.82642	ADCY4
positive regulation of neutrophil migration (GO:1902624)	1/26	0.277198	0.4615	0.265851	0.438374	-1.42049	1.82253	ADAM8
regulation of DNA biosynthetic process (GO:2000278)	1/23	0.249595	0.447228	0.240182	0.424236	-1.30664	1.81351	FAM129B
regulation of cell cycle (GO:0051726)	5/216	0.131607	0.404225	0.107865	0.391203	-0.892774	1.81049	CCNB2;CENPF;BIRC5;PROX1;CDC25C
regulation of cell division (GO:0051302)	2/66	0.197304	0.41908	0.18094	0.398791	-1.11048	1.80232	KIF18B;AURKB
intrinsic apoptotic signaling pathway in response to endoplasmic reticulum stress (GO:0070059)	1/25	0.268111	0.457818	0.257392	0.432569	-1.36809	1.80089	CHAC1
regulation of DNA damage response, signal transduction by p53 class mediator (GO:0043516)	1/26	0.277198	0.4615	0.265851	0.438374	-1.40266	1.79965	SNAI2
cellular nitrogen compound biosynthetic process (GO:0044271)	1/24	0.258911	0.455157	0.248836	0.431335	-1.33025	1.79754	NQO1
regulation of interleukin-10 production (GO:0032653)	1/26	0.277198	0.4615	0.265851	0.438374	-1.39907	1.79504	INAVA
ventricular cardiac muscle tissue development (GO:0003229)	1/22	0.240162	0.445332	0.231429	0.422301	-1.25712	1.7932	PROX1
positive regulation of filopodium assembly (GO:0051491)	1/26	0.277198	0.4615	0.265851	0.438374	-1.38591	1.77816	TGFB3
glutamate metabolic process (GO:0006536)	1/22	0.240162	0.445332	0.231429	0.422301	-1.2418	1.77135	GAD1
cellular response to ammonium ion (GO:0071242)	1/24	0.258911	0.455157	0.248836	0.431335	-1.30849	1.76813	AOC1
regulation of axon extension involved in axon guidance (GO:0048841)	1/24	0.258911	0.455157	0.248836	0.431335	-1.30694	1.76604	DSCAM
blood vessel endothelial cell migration (GO:0043534)	1/19	0.211151	0.425445	0.204564	0.403439	-1.13045	1.75806	EMP2
neuromuscular junction development (GO:0007528)	1/21	0.230612	0.437428	0.222576	0.41427	-1.19493	1.75298	ANK3
cellular response to cytokine stimulus (GO:0071345)	9/457	0.116527	0.404225	0.0847827	0.391203	-0.80971	1.74058	CCR1;ITGAM;IL1R1;IL1R2;BIRC5;AQP4;NPNT;CCR5;CCR2
microtubule polymerization (GO:0046785)	1/28	0.295036	0.479071	0.282483	0.455213	-1.41775	1.73059	TPPP3
positive regulation of cell cycle process (GO:0090068)	3/108	0.150602	0.407721	0.132656	0.391203	-0.913903	1.73012	SPAG5;NUSAP1;AURKB
embryonic skeletal system morphogenesis (GO:0048704)	1/22	0.240162	0.445332	0.231429	0.422301	-1.21238	1.72938	DSCAML1
regulation of T cell migration (GO:2000404)	1/18	0.201237	0.41908	0.195404	0.399665	-1.07169	1.7182	AIRE
respiratory tube development (GO:0030323)	1/26	0.277198	0.4615	0.265851	0.438374	-1.33851	1.71734	PROX1
regulation of viral entry into host cell (GO:0046596)	1/27	0.286172	0.470321	0.274214	0.446723	-1.36575	1.70877	LGALS1
glucose transport (GO:0015758)	1/23	0.249595	0.447228	0.240182	0.424236	-1.22802	1.70439	SLC2A6
viral budding via host ESCRT complex (GO:0039702)	1/21	0.230612	0.437428	0.222576	0.41427	-1.15587	1.69569	CHMP4C
renal system development (GO:0072001)	2/60	0.170519	0.413441	0.156714	0.396608	-0.957123	1.69306	CENPF;PROX1
stress-activated MAPK cascade (GO:0051403)	2/63	0.183839	0.417281	0.168752	0.396608	-0.995172	1.68552	MAP3K20;DUSP9
regulation of stress fiber assembly (GO:0051492)	2/61	0.174941	0.413441	0.160709	0.396608	-0.957692	1.66955	CARMIL1;TGFB3
regulation of bone resorption (GO:0045124)	1/23	0.249595	0.447228	0.240182	0.424236	-1.20207	1.66837	ADAM8
cellular senescence (GO:0090398)	1/25	0.268111	0.457818	0.257392	0.432569	-1.26381	1.66362	CDKN2A
peptide catabolic process (GO:0043171)	1/26	0.277198	0.4615	0.265851	0.438374	-1.29575	1.66248	CHAC1
cGMP metabolic process (GO:0046068)	1/29	0.30379	0.483272	0.290657	0.458949	-1.38715	1.65268	ADCY4
cyclic nucleotide metabolic process (GO:0009187)	1/26	0.277198	0.4615	0.265851	0.438374	-1.28543	1.64924	ADCY4
negative regulation of apoptotic signaling pathway (GO:2001234)	2/66	0.197304	0.41908	0.18094	0.398791	-1.01496	1.64729	LGALS3;HSPA1A
positive regulation of intracellular signal transduction (GO:1902533)	9/480	0.143991	0.406226	0.105966	0.391203	-0.848217	1.64385	FGF16;LTK;LGALS1;ERBB2;S100A4;ADAM8;EPHA3;JCAD;INAVA
negative regulation of cell adhesion (GO:0007162)	2/66	0.197304	0.41908	0.18094	0.398791	-1.0096	1.6386	DSCAM;SNAI2
regulation of cell size (GO:0008361)	1/24	0.258911	0.455157	0.248836	0.431335	-1.20771	1.63195	RAP1GAP2
enzyme linked receptor protein signaling pathway (GO:0007167)	3/121	0.190072	0.417443	0.167463	0.396608	-0.981037	1.62887	BLK;SRMS;ERBB2
positive regulation of transcription regulatory region DNA binding (GO:2000679)	1/20	0.220942	0.430606	0.213621	0.410638	-1.07704	1.62618	FAM129B
mammary gland development (GO:0030879)	1/25	0.268111	0.457818	0.257392	0.432569	-1.23139	1.62095	TGFB3
positive regulation of leukocyte cell-cell adhesion (GO:1903039)	1/22	0.240162	0.445332	0.231429	0.422301	-1.13314	1.61636	CCR2
carboxylic acid catabolic process (GO:0046395)	1/29	0.30379	0.483272	0.290657	0.458949	-1.35588	1.61542	HMMR
camera-type eye development (GO:0043010)	1/25	0.268111	0.457818	0.257392	0.432569	-1.22705	1.61523	ALDH1A3
negative regulation of intrinsic apoptotic signaling pathway (GO:2001243)	2/63	0.183839	0.417281	0.168752	0.396608	-0.9514	1.61138	SNAI2;HSPA1A
glycogen catabolic process (GO:0005980)	1/19	0.211151	0.425445	0.204564	0.403439	-1.03462	1.60903	STBD1
response to alcohol (GO:0097305)	1/26	0.277198	0.4615	0.265851	0.438374	-1.24177	1.59323	CCR5
receptor clustering (GO:0043113)	1/25	0.268111	0.457818	0.257392	0.432569	-1.20691	1.58872	MADCAM1
regulation of transmembrane receptor protein serine/threonine kinase signaling pathway (GO:0090092)	1/29	0.30379	0.483272	0.290657	0.458949	-1.32954	1.58404	DKK3
positive regulation of immune effector process (GO:0002699)	1/25	0.268111	0.457818	0.257392	0.432569	-1.20131	1.58135	CCR2
heterotypic cell-cell adhesion (GO:0034113)	1/26	0.277198	0.4615	0.265851	0.438374	-1.23127	1.57975	MADCAM1
regulation of viral genome replication (GO:0045069)	2/64	0.188313	0.417443	0.172799	0.396608	-0.945434	1.57854	TOP2A;PROX1
synaptic transmission, cholinergic (GO:0007271)	1/29	0.30379	0.483272	0.290657	0.458949	-1.3176	1.56981	NQO1
serine family amino acid metabolic process (GO:0009069)	1/18	0.201237	0.41908	0.195404	0.399665	-0.971558	1.55767	AOC1
positive regulation of microtubule polymerization or depolymerization (GO:0031112)	1/25	0.268111	0.457818	0.257392	0.432569	-1.18242	1.55648	PSRC1
positive regulation of nuclear division (GO:0051785)	1/26	0.277198	0.4615	0.265851	0.438374	-1.20986	1.55228	NUSAP1
regulation of transcription regulatory region DNA binding (GO:2000677)	1/27	0.286172	0.470321	0.274214	0.446723	-1.23597	1.5464	FAM129B
DNA conformation change (GO:0071103)	1/19	0.211151	0.425445	0.204564	0.403439	-0.990013	1.53965	TOP2A
response to gamma radiation (GO:0010332)	1/27	0.286172	0.470321	0.274214	0.446723	-1.23005	1.53899	MAP3K20
cellular response to copper ion (GO:0071280)	1/22	0.240162	0.445332	0.231429	0.422301	-1.07643	1.53547	AOC1
digestive system development (GO:0055123)	1/23	0.249595	0.447228	0.240182	0.424236	-1.10403	1.5323	COBL
negative regulation of cell-matrix adhesion (GO:0001953)	1/28	0.295036	0.479071	0.282483	0.455213	-1.25151	1.52767	CDKN2A
protein phosphorylation (GO:0006468)	9/471	0.132876	0.404225	0.0973455	0.391203	-0.756293	1.52646	CCNA2;PRKCG;LTK;ERBB2;MAP3K20;BIRC5;NEK2;AURKB;EPHA3
peptidyl-lysine modification (GO:0018205)	3/116	0.174577	0.413441	0.153765	0.396608	-0.874028	1.52552	TOP2A;BIRC5;AURKB
cellular modified amino acid biosynthetic process (GO:0042398)	1/25	0.268111	0.457818	0.257392	0.432569	-1.15626	1.52204	CHAC1
nucleotide biosynthetic process (GO:0009165)	1/27	0.286172	0.470321	0.274214	0.446723	-1.21457	1.51962	ADCY4
response to copper ion (GO:0046688)	1/26	0.277198	0.4615	0.265851	0.438374	-1.18017	1.51419	AOC1
NAD biosynthetic process (GO:0009435)	1/23	0.249595	0.447228	0.240182	0.424236	-1.09071	1.51382	KYNU
striated muscle contraction (GO:0006941)	2/62	0.179382	0.413441	0.164721	0.396608	-0.878293	1.50912	OBSL1;SCN4B
superoxide metabolic process (GO:0006801)	1/30	0.312435	0.491252	0.29874	0.465784	-1.29704	1.50893	SH3PXD2B
synaptic transmission, glutamatergic (GO:0035249)	1/22	0.240162	0.445332	0.231429	0.422301	-1.05716	1.50798	SLC1A4
cGMP biosynthetic process (GO:0006182)	1/25	0.268111	0.457818	0.257392	0.432569	-1.13463	1.49358	ADCY4
positive regulation of ion transmembrane transporter activity (GO:0032414)	1/24	0.258911	0.455157	0.248836	0.431335	-1.10273	1.49009	ANK3
embryonic skeletal system development (GO:0048706)	1/22	0.240162	0.445332	0.231429	0.422301	-1.0445	1.48992	DSCAML1
regulation of DNA replication (GO:0006275)	2/62	0.179382	0.413441	0.164721	0.396608	-0.865923	1.48786	TGFB3;ESCO2
regulation of chromosome organization (GO:0033044)	1/25	0.268111	0.457818	0.257392	0.432569	-1.12623	1.48252	MKI67
negative regulation of interferon-gamma production (GO:0032689)	1/21	0.230612	0.437428	0.222576	0.41427	-1.00633	1.4763	HAVCR2
homophilic cell adhesion via plasma membrane adhesion molecules (GO:0007156)	2/65	0.192801	0.41908	0.176862	0.396608	-0.894782	1.4729	DSCAM;DSCAML1
cytokine-mediated signaling pathway (GO:0019221)	11/634	0.165994	0.413441	0.117766	0.391203	-0.816137	1.46562	CCR1;IL1RL1;ITGAM;IL1R1;CD70;IL1R2;BIRC5;CCR5;IL9R;IL17RB;CCR2
eosinophil migration (GO:0072677)	1/25	0.268111	0.457818	0.257392	0.432569	-1.1095	1.46049	LGALS3
regulation of signal transduction (GO:0009966)	5/234	0.166299	0.413441	0.137005	0.391203	-0.813439	1.45929	LTK;SRMS;ERBB2;BIRC5;EPHA3
positive regulation of sprouting angiogenesis (GO:1903672)	1/29	0.30379	0.483272	0.290657	0.458949	-1.22191	1.45581	JCAD
cyclic purine nucleotide metabolic process (GO:0052652)	1/31	0.320974	0.493729	0.30673	0.467473	-1.27409	1.44787	ADCY4
response to ketone (GO:1901654)	1/27	0.286172	0.470321	0.274214	0.446723	-1.15461	1.4446	TGFB3
positive regulation of embryonic development (GO:0040019)	1/26	0.277198	0.4615	0.265851	0.438374	-1.12526	1.44373	FAM129B
eosinophil chemotaxis (GO:0048245)	1/25	0.268111	0.457818	0.257392	0.432569	-1.09601	1.44274	LGALS3
regulation of actin filament-based process (GO:0032970)	2/63	0.183839	0.417281	0.168752	0.396608	-0.851662	1.44245	RHOV;EPHA3
regulation of embryonic development (GO:0045995)	1/30	0.312435	0.491252	0.29874	0.465784	-1.23877	1.44113	FAM129B
regulation of cellular senescence (GO:2000772)	1/25	0.268111	0.457818	0.257392	0.432569	-1.09281	1.43853	CDKN2A
calcium-mediated signaling (GO:0019722)	2/71	0.219989	0.430606	0.201527	0.403439	-0.945256	1.43129	NMUR1;CCR5
viral budding (GO:0046755)	1/24	0.258911	0.455157	0.248836	0.431335	-1.0492	1.41775	CHMP4C
regulation of myeloid cell differentiation (GO:0045637)	2/66	0.197304	0.41908	0.18094	0.398791	-0.869475	1.41117	LGALS3;MEIS1
NAD metabolic process (GO:0019674)	1/24	0.258911	0.455157	0.248836	0.431335	-1.04432	1.41116	KYNU
regulation of cell adhesion mediated by integrin (GO:0033628)	1/31	0.320974	0.493729	0.30673	0.467473	-1.24072	1.40995	SNAI2
regulation of osteoblast differentiation (GO:0045667)	2/70	0.215432	0.430606	0.197386	0.401513	-0.917777	1.40889	SNAI2;NPNT
positive regulation of endothelial cell proliferation (GO:0001938)	2/68	0.206346	0.425445	0.189138	0.399665	-0.889662	1.40406	PROX1;JCAD
regulation of microtubule cytoskeleton organization (GO:0070507)	1/24	0.258911	0.455157	0.248836	0.431335	-1.03302	1.39589	EPHA3
regulation of phosphorylation (GO:0042325)	3/120	0.186945	0.417443	0.164695	0.396608	-0.828564	1.38946	DSCAM;CDKN2A;EMP2
negative regulation of GTPase activity (GO:0034260)	1/23	0.249595	0.447228	0.240182	0.424236	-0.9937	1.37917	SH3BP4
negative regulation of response to DNA damage stimulus (GO:2001021)	1/29	0.30379	0.483272	0.290657	0.458949	-1.15748	1.37905	SNAI2
cellular response to steroid hormone stimulus (GO:0071383)	1/21	0.230612	0.437428	0.222576	0.41427	-0.933033	1.36878	MGARP
negative regulation of secretion by cell (GO:1903531)	1/31	0.320974	0.493729	0.30673	0.467473	-1.19222	1.35483	PNKD
negative regulation of synaptic transmission (GO:0050805)	1/28	0.295036	0.479071	0.282483	0.455213	-1.10787	1.35233	PNKD
positive regulation of RNA splicing (GO:0033120)	1/23	0.249595	0.447228	0.240182	0.424236	-0.97151	1.34837	HSPA1A
negative regulation of intrinsic apoptotic signaling pathway in response to DNA damage (GO:1902230)	1/25	0.268111	0.457818	0.257392	0.432569	-1.02427	1.34831	SNAI2
positive regulation of cell communication (GO:0010647)	1/29	0.30379	0.483272	0.290657	0.458949	-1.12832	1.34431	ANK3
negative regulation of smooth muscle cell proliferation (GO:0048662)	1/28	0.295036	0.479071	0.282483	0.455213	-1.08916	1.32949	TGFB3
positive regulation of inflammatory response (GO:0050729)	2/74	0.233704	0.441606	0.214006	0.410638	-0.908129	1.32015	ADAM8;CCR2
retinoid metabolic process (GO:0001523)	2/76	0.242876	0.447228	0.222367	0.41427	-0.932517	1.3197	ALDH1A3;BCO2
chondrocyte differentiation (GO:0002062)	1/29	0.30379	0.483272	0.290657	0.458949	-1.10357	1.31482	WNT10B
negative regulation of DNA biosynthetic process (GO:2000279)	1/31	0.320974	0.493729	0.30673	0.467473	-1.15627	1.31398	FAM129B
cation transmembrane transport (GO:0098655)	1/27	0.286172	0.470321	0.274214	0.446723	-1.04878	1.31219	SLC36A3
activation of JUN kinase activity (GO:0007257)	1/31	0.320974	0.493729	0.30673	0.467473	-1.15147	1.30853	MAP3K20
actin nucleation (GO:0045010)	1/25	0.268111	0.457818	0.257392	0.432569	-0.99204	1.30588	SCIN
positive regulation of insulin secretion (GO:0032024)	1/32	0.329407	0.499986	0.314631	0.472263	-1.17414	1.30384	BLK
positive regulation of substrate adhesion-dependent cell spreading (GO:1900026)	1/28	0.295036	0.479071	0.282483	0.455213	-1.0662	1.30146	CARMIL1
cardiac muscle cell development (GO:0055013)	1/28	0.295036	0.479071	0.282483	0.455213	-1.0656	1.30073	OBSL1
JNK cascade (GO:0007254)	2/67	0.201819	0.419705	0.185033	0.398791	-0.812497	1.30031	MAP3K20;DUSP9
endocrine system development (GO:0035270)	1/27	0.286172	0.470321	0.274214	0.446723	-1.03865	1.29951	DKK3
regulation of TORC1 signaling (GO:1903432)	1/29	0.30379	0.483272	0.290657	0.458949	-1.08587	1.29372	RNF152
nitrogen compound transport (GO:0071705)	2/75	0.238288	0.445332	0.218183	0.41427	-0.900094	1.29098	CUBN;SLC1A4
positive regulation of cation channel activity (GO:2001259)	1/31	0.320974	0.493729	0.30673	0.467473	-1.13502	1.28983	ANK3
negative regulation of phosphatase activity (GO:0010923)	2/69	0.210884	0.425445	0.193256	0.399665	-0.828116	1.28892	PPP4R4;KNL1
anterograde axonal transport (GO:0008089)	1/32	0.329407	0.499986	0.314631	0.472263	-1.16032	1.28849	MGARP
neuropeptide signaling pathway (GO:0007218)	2/71	0.219989	0.430606	0.201527	0.403439	-0.850136	1.28726	CYSLTR1;NMUR1
regulation of protein insertion into mitochondrial membrane involved in apoptotic signaling pathway (GO:1900739)	1/31	0.320974	0.493729	0.30673	0.467473	-1.12837	1.28227	GZMB
protein localization to lysosome (GO:0061462)	1/31	0.320974	0.493729	0.30673	0.467473	-1.12826	1.28215	SH3BP4
fibroblast growth factor receptor signaling pathway (GO:0008543)	2/79	0.256661	0.455157	0.234954	0.424236	-0.941427	1.28034	FGF16;SHCBP1
multivesicular body assembly (GO:0036258)	1/31	0.320974	0.493729	0.30673	0.467473	-1.11961	1.27232	CHMP4C
regulation of Notch signaling pathway (GO:0008593)	2/71	0.219989	0.430606	0.201527	0.403439	-0.839832	1.27166	CHAC1;FAM129B
positive regulation of interleukin-1 beta production (GO:0032731)	1/32	0.329407	0.499986	0.314631	0.472263	-1.14004	1.26597	INAVA
regulation of endocytosis (GO:0030100)	2/70	0.215432	0.430606	0.197386	0.401513	-0.823043	1.26346	LGALS3;EPHA3
endodermal cell differentiation (GO:0035987)	1/33	0.337735	0.501884	0.322441	0.477252	-1.16257	1.26196	LAMA3
lymphocyte differentiation (GO:0030098)	2/74	0.233704	0.441606	0.214006	0.410638	-0.867929	1.26171	BLK;AICDA
'de novo' posttranslational protein folding (GO:0051084)	1/31	0.320974	0.493729	0.30673	0.467473	-1.10863	1.25984	HSPA1A
positive regulation of T cell differentiation (GO:0045582)	1/33	0.337735	0.501884	0.322441	0.477252	-1.15488	1.25362	ADAM8
negative regulation of macromolecule metabolic process (GO:0010605)	3/125	0.20271	0.42097	0.178669	0.398791	-0.784851	1.25261	CCR1;OPTN;HAVCR2
response to interferon-gamma (GO:0034341)	2/69	0.210884	0.425445	0.193256	0.399665	-0.803493	1.25059	KYNU;AQP4
determination of bilateral symmetry (GO:0009855)	1/30	0.312435	0.491252	0.29874	0.465784	-1.07133	1.24634	STIL
regulation of epithelial to mesenchymal transition (GO:0010717)	2/69	0.210884	0.425445	0.193256	0.399665	-0.800226	1.24551	TGFB3;EPHA3
bone development (GO:0060348)	1/35	0.354085	0.511876	0.337798	0.486443	-1.19845	1.24425	SH3PXD2B
activation of adenylate cyclase activity (GO:0007190)	1/33	0.337735	0.501884	0.322441	0.477252	-1.14382	1.24161	ADCY4
protein K11-linked ubiquitination (GO:0070979)	1/29	0.30379	0.483272	0.290657	0.458949	-1.03971	1.23873	UBE2C
regulation of cell-cell adhesion (GO:0022407)	1/33	0.337735	0.501884	0.322441	0.477252	-1.13566	1.23275	ADAM8
negative regulation of fat cell differentiation (GO:0045599)	1/33	0.337735	0.501884	0.322441	0.477252	-1.13181	1.22857	WNT10B
positive regulation of tumor necrosis factor superfamily cytokine production (GO:1903557)	1/33	0.337735	0.501884	0.322441	0.477252	-1.13135	1.22807	ADAM8
regulation of mitochondrial membrane potential (GO:0051881)	1/36	0.362108	0.514975	0.345347	0.488454	-1.20366	1.2227	BCO2
multivesicular body organization (GO:0036257)	1/32	0.329407	0.499986	0.314631	0.472263	-1.09351	1.2143	CHMP4C
response to growth factor (GO:0070848)	1/27	0.286172	0.470321	0.274214	0.446723	-0.970198	1.21387	ERBB2
regulation of actin cytoskeleton organization (GO:0032956)	2/76	0.242876	0.447228	0.222367	0.41427	-0.850782	1.20403	RHOV;EPHA3
canonical Wnt signaling pathway (GO:0060070)	2/74	0.233704	0.441606	0.214006	0.410638	-0.823404	1.19698	WNT10B;SNAI2
plasma membrane organization (GO:0007009)	1/37	0.370032	0.517845	0.352809	0.491425	-1.19906	1.19206	ANK3
regulation of cell migration involved in sprouting angiogenesis (GO:0090049)	1/31	0.320974	0.493729	0.30673	0.467473	-1.04602	1.18869	JCAD
negative regulation of cell-cell adhesion (GO:0022408)	1/32	0.329407	0.499986	0.314631	0.472263	-1.06961	1.18777	SNAI2
spindle assembly (GO:0051225)	2/81	0.265859	0.457818	0.243369	0.428848	-0.895151	1.18589	BIRC5;NEK2
response to hexose (GO:0009746)	1/28	0.295036	0.479071	0.282483	0.455213	-0.956832	1.16797	KLRG1
positive regulation of viral genome replication (GO:0045070)	1/32	0.329407	0.499986	0.314631	0.472263	-1.05157	1.16773	TOP2A
fat-soluble vitamin metabolic process (GO:0006775)	1/27	0.286172	0.470321	0.274214	0.446723	-0.9331	1.16746	CUBN
regulation of endothelial cell migration (GO:0010594)	2/70	0.215432	0.430606	0.197386	0.401513	-0.759182	1.16543	EMP2;PROX1
regulation of vascular endothelial growth factor production (GO:0010574)	1/28	0.295036	0.479071	0.282483	0.455213	-0.949939	1.15955	CCR2
purine ribonucleoside triphosphate metabolic process (GO:0009205)	1/33	0.337735	0.501884	0.322441	0.477252	-1.06683	1.15804	HSPA1A
sensory perception of mechanical stimulus (GO:0050954)	2/79	0.256661	0.455157	0.234954	0.424236	-0.849923	1.1559	BIRC5;SNAI2
connective tissue development (GO:0061448)	1/31	0.320974	0.493729	0.30673	0.467473	-1.01682	1.15551	SH3PXD2B
regulation of cell-substrate adhesion (GO:0010810)	1/34	0.345961	0.506027	0.330164	0.481502	-1.08539	1.15207	NPNT
regulation of transforming growth factor beta receptor signaling pathway (GO:0017015)	2/80	0.261259	0.457127	0.23916	0.424236	-0.856862	1.15012	DKK3;HSPA1A
regulation of T cell receptor signaling pathway (GO:0050856)	1/27	0.286172	0.470321	0.274214	0.446723	-0.912961	1.14226	LGALS3
heart looping (GO:0001947)	1/37	0.370032	0.517845	0.352809	0.491425	-1.14359	1.13692	STIL
response to peptide (GO:1901652)	1/35	0.354085	0.511876	0.337798	0.486443	-1.09342	1.13521	INAVA
positive regulation of fibroblast proliferation (GO:0048146)	1/29	0.30379	0.483272	0.290657	0.458949	-0.952121	1.13438	S100A6
chromatin remodeling at centromere (GO:0031055)	1/33	0.337735	0.501884	0.322441	0.477252	-1.04468	1.13399	KNL1
anaphase-promoting complex-dependent catabolic process (GO:0031145)	2/80	0.261259	0.457127	0.23916	0.424236	-0.831715	1.11636	UBE2C;AURKB
cellular response to hypoxia (GO:0071456)	3/133	0.228533	0.437428	0.201664	0.403439	-0.754879	1.11426	LMNA;ADAM8;MGARP
amino acid transmembrane transport (GO:0003333)	1/30	0.312435	0.491252	0.29874	0.465784	-0.95477	1.11074	SLC36A3
positive regulation of cytokinesis (GO:0032467)	1/35	0.354085	0.511876	0.337798	0.486443	-1.06648	1.10724	AURKB
protein trimerization (GO:0070206)	1/33	0.337735	0.501884	0.322441	0.477252	-1.02003	1.10723	COL6A2
regulation of vascular smooth muscle cell proliferation (GO:1904705)	1/26	0.277198	0.4615	0.265851	0.438374	-0.860533	1.10408	TGFB3
negative regulation of tumor necrosis factor superfamily cytokine production (GO:1903556)	1/32	0.329407	0.499986	0.314631	0.472263	-0.991074	1.10055	HAVCR2
CENP-A containing nucleosome assembly (GO:0034080)	1/31	0.320974	0.493729	0.30673	0.467473	-0.966208	1.09799	KNL1
lung development (GO:0030324)	1/30	0.312435	0.491252	0.29874	0.465784	-0.943148	1.09722	PROX1
central nervous system neuron differentiation (GO:0021953)	1/33	0.337735	0.501884	0.322441	0.477252	-1.00794	1.09411	PROX1
CENP-A containing chromatin organization (GO:0061641)	1/31	0.320974	0.493729	0.30673	0.467473	-0.96072	1.09176	KNL1
negative regulation of proteasomal protein catabolic process (GO:1901799)	1/29	0.30379	0.483272	0.290657	0.458949	-0.914521	1.08958	PRKCG
positive regulation of adenylate cyclase activity (GO:0045762)	1/34	0.345961	0.506027	0.330164	0.481502	-1.02587	1.08889	ADCY4
skeletal system morphogenesis (GO:0048705)	1/32	0.329407	0.499986	0.314631	0.472263	-0.980515	1.08882	DSCAML1
histone exchange (GO:0043486)	1/37	0.370032	0.517845	0.352809	0.491425	-1.09518	1.08879	KNL1
regulation of ubiquitin protein ligase activity (GO:1904666)	1/37	0.370032	0.517845	0.352809	0.491425	-1.09411	1.08773	UBE2C
regulation of cytokinesis (GO:0032465)	2/78	0.252063	0.450567	0.230753	0.422301	-0.789027	1.08734	CHMP4C;AURKB
proton transport (GO:0015992)	1/32	0.329407	0.499986	0.314631	0.472263	-0.975417	1.08316	SLC36A3
protein catabolic process (GO:0030163)	2/82	0.270458	0.460242	0.247582	0.431335	-0.826504	1.08077	BACE2;FBXO44
cellular response to glucagon stimulus (GO:0071377)	1/33	0.337735	0.501884	0.322441	0.477252	-0.991441	1.0762	ADCY4
positive regulation of cytokine-mediated signaling pathway (GO:0001961)	1/34	0.345961	0.506027	0.330164	0.481502	-1.00937	1.07137	HSPA1A
positive regulation of DNA binding (GO:0043388)	1/35	0.354085	0.511876	0.337798	0.486443	-1.02978	1.06914	FAM129B
sensory perception of sound (GO:0007605)	2/82	0.270458	0.460242	0.247582	0.431335	-0.815984	1.06701	BIRC5;SNAI2
striated muscle tissue development (GO:0014706)	1/30	0.312435	0.491252	0.29874	0.465784	-0.916685	1.06643	POPDC2
negative regulation of mitochondrion organization (GO:0010823)	1/34	0.345961	0.506027	0.330164	0.481502	-1.00226	1.06383	HSPA1A
ephrin receptor signaling pathway (GO:0048013)	2/83	0.275057	0.4615	0.251797	0.432569	-0.823489	1.06294	ARHGEF28;EPHA3
negative regulation of cellular metabolic process (GO:0031324)	1/35	0.354085	0.511876	0.337798	0.486443	-1.0215	1.06054	OPTN
endoderm formation (GO:0001706)	1/37	0.370032	0.517845	0.352809	0.491425	-1.06489	1.05868	LAMA3
positive regulation of phosphate metabolic process (GO:0045937)	1/29	0.30379	0.483272	0.290657	0.458949	-0.884853	1.05423	DSCAM
cellular response to amino acid stimulus (GO:0071230)	1/33	0.337735	0.501884	0.322441	0.477252	-0.961269	1.04345	SH3BP4
positive regulation of cell cycle (GO:0045787)	2/83	0.275057	0.4615	0.251797	0.432569	-0.803581	1.03725	PSRC1;PROX1
positive regulation of innate immune response (GO:0045089)	1/39	0.385588	0.530139	0.367482	0.501081	-1.08118	1.03035	ADAM8
positive regulation of cell-matrix adhesion (GO:0001954)	1/34	0.345961	0.506027	0.330164	0.481502	-0.964257	1.02349	EMP2
positive regulation of protein kinase B signaling (GO:0051897)	3/128	0.212315	0.427212	0.187207	0.399665	-0.660004	1.0228	FGF16;ERBB2;ADAM8
positive regulation of biomineral tissue development (GO:0070169)	1/34	0.345961	0.506027	0.330164	0.481502	-0.950967	1.00938	TGFB3
ventricular cardiac muscle tissue morphogenesis (GO:0055010)	1/35	0.354085	0.511876	0.337798	0.486443	-0.971415	1.00854	PROX1
positive regulation of programmed cell death (GO:0043068)	5/258	0.217401	0.430606	0.1806	0.398791	-0.660329	1.00767	TOP2A;WNT10B;SCIN;TGFB3;MAP3K20
regulation of protein polymerization (GO:0032271)	1/31	0.320974	0.493729	0.30673	0.467473	-0.886063	1.00692	TPPP3
positive regulation of mitotic cell cycle phase transition (GO:1901992)	1/41	0.40076	0.535666	0.381824	0.507622	-1.09732	1.00338	UBE2C
smoothened signaling pathway (GO:0007224)	1/31	0.320974	0.493729	0.30673	0.467473	-0.880685	1.00081	STIL
positive regulation of smooth muscle cell proliferation (GO:0048661)	1/38	0.377858	0.522892	0.360188	0.495762	-1.02611	0.998642	RBPMS2
dopamine receptor signaling pathway (GO:0007212)	1/29	0.30379	0.483272	0.290657	0.458949	-0.837252	0.997519	GNA15
respiratory system development (GO:0060541)	1/30	0.312435	0.491252	0.29874	0.465784	-0.853198	0.992576	PROX1
axonal transport (GO:0098930)	1/37	0.370032	0.517845	0.352809	0.491425	-0.996599	0.990784	MGARP
positive regulation of ubiquitin-protein transferase activity (GO:0051443)	1/32	0.329407	0.499986	0.314631	0.472263	-0.887491	0.985526	UBE2C
entry into host cell (GO:0030260)	1/34	0.345961	0.506027	0.330164	0.481502	-0.927966	0.98497	CCR5
glycogen metabolic process (GO:0005977)	1/34	0.345961	0.506027	0.330164	0.481502	-0.916233	0.972516	STBD1
regulation of interleukin-8 production (GO:0032677)	1/35	0.354085	0.511876	0.337798	0.486443	-0.936253	0.972035	HSPA1A
cellular response to organic cyclic compound (GO:0071407)	3/136	0.238374	0.445332	0.210462	0.410638	-0.67725	0.971118	AOC1;CIB2;MGARP
regulation of sodium ion transmembrane transport (GO:1902305)	1/31	0.320974	0.493729	0.30673	0.467473	-0.854064	0.970555	SCN4B
response to amino acid (GO:0043200)	1/35	0.354085	0.511876	0.337798	0.486443	-0.931161	0.966749	SH3BP4
cardiac muscle tissue morphogenesis (GO:0055008)	1/37	0.370032	0.517845	0.352809	0.491425	-0.958994	0.953398	PROX1
negative regulation of cell cycle process (GO:0010948)	2/82	0.270458	0.460242	0.247582	0.431335	-0.728265	0.952307	CHMP4C;AURKB
neutrophil degranulation (GO:0043312)	8/480	0.246759	0.447228	0.192397	0.399665	-0.677304	0.947782	LGALS3;MMP25;AOC1;ITGAM;STBD1;PADI2;ADAM8;HSPA1A
skeletal muscle organ development (GO:0060538)	1/30	0.312435	0.491252	0.29874	0.465784	-0.810552	0.942963	POPDC2
DNA damage checkpoint (GO:0000077)	1/39	0.385588	0.530139	0.367482	0.501081	-0.986384	0.940011	MAP3K20
regulation of substrate adhesion-dependent cell spreading (GO:1900024)	1/42	0.408206	0.541728	0.388874	0.513782	-1.04772	0.938738	CARMIL1
nucleotide-binding oligomerization domain containing signaling pathway (GO:0070423)	1/29	0.30379	0.483272	0.290657	0.458949	-0.787524	0.938272	INAVA
activation of MAPKK activity (GO:0000186)	1/34	0.345961	0.506027	0.330164	0.481502	-0.883603	0.937882	MAP3K20
regulation of neurotransmitter secretion (GO:0046928)	1/28	0.295036	0.479071	0.282483	0.455213	-0.766725	0.93591	PNKD
regulation of osteoclast differentiation (GO:0045670)	1/38	0.377858	0.522892	0.360188	0.495762	-0.958121	0.932478	CCR1
regulation of ERK1 and ERK2 cascade (GO:0070372)	5/248	0.195515	0.41908	0.161831	0.396608	-0.570084	0.930446	CCR1;LTK;ERBB2;NPNT;EPHA3
regulation of filopodium assembly (GO:0051489)	1/37	0.370032	0.517845	0.352809	0.491425	-0.928585	0.923167	TGFB3
negative regulation of cytokine-mediated signaling pathway (GO:0001960)	1/41	0.40076	0.535666	0.381824	0.507622	-1.00949	0.923064	PADI2
sodium ion transmembrane transport (GO:0035725)	1/37	0.370032	0.517845	0.352809	0.491425	-0.926292	0.920886	SCN4B
regulation of anatomical structure morphogenesis (GO:0022603)	2/83	0.275057	0.4615	0.251797	0.432569	-0.712973	0.92029	ERBB2;EMP2
regulation of apoptotic process (GO:0042981)	13/816	0.214773	0.430606	0.149866	0.396608	-0.593637	0.913115	TOP2A;WNT10B;LTK;STIL;TGFB3;FAM129B;SCIN;LGALS1;ERBB2;MAP3K20;BIRC5;EPHA3;HSPA1A
sensory organ development (GO:0007423)	1/41	0.40076	0.535666	0.381824	0.507622	-0.991839	0.906929	SH3PXD2B
positive regulation of neuron death (GO:1901216)	1/39	0.385588	0.530139	0.367482	0.501081	-0.950695	0.906	ITGAM
regulation of cyclin-dependent protein kinase activity (GO:1904029)	1/36	0.362108	0.514975	0.345347	0.488454	-0.890739	0.904824	CDC25C
positive regulation of response to external stimulus (GO:0032103)	2/91	0.311741	0.491252	0.285542	0.458654	-0.775731	0.904178	OPTN;CCR2
ERBB2 signaling pathway (GO:0038128)	1/40	0.393221	0.532279	0.374694	0.504448	-0.956467	0.89275	ERBB2
protein acetylation (GO:0006473)	1/34	0.345961	0.506027	0.330164	0.481502	-0.839232	0.890786	ESCO2
positive regulation of peptide hormone secretion (GO:0090277)	1/40	0.393221	0.532279	0.374694	0.504448	-0.945788	0.882782	BLK
actin polymerization or depolymerization (GO:0008154)	1/37	0.370032	0.517845	0.352809	0.491425	-0.886764	0.881589	COBL
positive regulation of protein insertion into mitochondrial membrane involved in apoptotic signaling pathway (GO:1900740)	1/31	0.320974	0.493729	0.30673	0.467473	-0.775433	0.881199	GZMB
ventricular septum development (GO:0003281)	1/29	0.30379	0.483272	0.290657	0.458949	-0.738251	0.879568	PROX1
cell-cell adhesion via plasma-membrane adhesion molecules (GO:0098742)	3/143	0.261599	0.457184	0.231304	0.422301	-0.652897	0.875497	ITGAM;DSCAM;DSCAML1
protein K63-linked ubiquitination (GO:0070534)	1/38	0.377858	0.522892	0.360188	0.495762	-0.898539	0.87449	RNF152
positive regulation of DNA replication (GO:0045740)	1/36	0.362108	0.514975	0.345347	0.488454	-0.85869	0.872268	TGFB3
positive regulation of homeostatic process (GO:0032846)	2/84	0.279654	0.464737	0.256014	0.432569	-0.683943	0.871482	ADAM8;HSPA1A
cardiac muscle contraction (GO:0060048)	1/37	0.370032	0.517845	0.352809	0.491425	-0.874378	0.869276	SCN4B
positive regulation of mitochondrial outer membrane permeabilization involved in apoptotic signaling pathway (GO:1901030)	1/38	0.377858	0.522892	0.360188	0.495762	-0.880541	0.856974	GZMB
embryonic limb morphogenesis (GO:0030326)	1/35	0.354085	0.511876	0.337798	0.486443	-0.825226	0.856764	MAP3K20
regulation of erythrocyte differentiation (GO:0045646)	1/33	0.337735	0.501884	0.322441	0.477252	-0.783205	0.850164	HSPA1A
regulation of dendrite development (GO:0050773)	1/38	0.377858	0.522892	0.360188	0.495762	-0.872265	0.848919	COBL
phosphorylation (GO:0016310)	7/387	0.206302	0.425445	0.162601	0.396608	-0.535988	0.84601	PRKCG;LTK;ERBB2;MAP3K20;BIRC5;NEK2;AURKB
regulation of I-kappaB kinase/NF-kappaB signaling (GO:0043122)	4/205	0.25029	0.447934	0.214665	0.411373	-0.608001	0.842165	LGALS1;S100A4;OPTN;INAVA
mRNA catabolic process (GO:0006402)	1/37	0.370032	0.517845	0.352809	0.491425	-0.847093	0.84215	HSPA1A
positive regulation of RNA metabolic process (GO:0051254)	1/36	0.362108	0.514975	0.345347	0.488454	-0.826234	0.839298	HSPA1A
regulation of ion transmembrane transporter activity (GO:0032412)	1/43	0.41556	0.548554	0.395843	0.521141	-0.953574	0.83736	SCN4B
positive regulation of reactive oxygen species metabolic process (GO:2000379)	1/40	0.393221	0.532279	0.374694	0.504448	-0.895251	0.835612	ITGAM
neutrophil mediated immunity (GO:0002446)	8/488	0.2606	0.457127	0.204023	0.403439	-0.615831	0.828149	LGALS3;MMP25;AOC1;ITGAM;STBD1;PADI2;ADAM8;HSPA1A
regulation of proteasomal protein catabolic process (GO:0061136)	1/40	0.393221	0.532279	0.374694	0.504448	-0.884772	0.82583	PRKCG
regulation of potassium ion transport (GO:0043266)	1/37	0.370032	0.517845	0.352809	0.491425	-0.827739	0.822909	ANK3
positive regulation of bone mineralization (GO:0030501)	1/32	0.329407	0.499986	0.314631	0.472263	-0.740581	0.822387	TGFB3
positive regulation of intracellular transport (GO:0032388)	1/45	0.429995	0.555302	0.409546	0.52752	-0.973182	0.821347	SPAG5
negative regulation of cell-substrate adhesion (GO:0010812)	1/36	0.362108	0.514975	0.345347	0.488454	-0.808436	0.821219	CDKN2A
negative regulation of NF-kappaB transcription factor activity (GO:0032088)	2/83	0.275057	0.4615	0.251797	0.432569	-0.63395	0.818289	CDKN2A;HAVCR2
positive regulation of myeloid leukocyte differentiation (GO:0002763)	1/33	0.337735	0.501884	0.322441	0.477252	-0.751767	0.816038	CCR1
muscle cell differentiation (GO:0042692)	1/37	0.370032	0.517845	0.352809	0.491425	-0.809801	0.805076	POPDC2
sarcomere organization (GO:0045214)	1/32	0.329407	0.499986	0.314631	0.472263	-0.72415	0.804141	OBSL1
regulation of smoothened signaling pathway (GO:0008589)	1/37	0.370032	0.517845	0.352809	0.491425	-0.802167	0.797486	GLIS2
regulation of MAP kinase activity (GO:0043405)	2/88	0.298016	0.483272	0.272891	0.446723	-0.658428	0.797099	ERBB2;ADAM8
regulation of smooth muscle cell proliferation (GO:0048660)	1/45	0.429995	0.555302	0.409546	0.52752	-0.935582	0.789613	RBPMS2
positive regulation of cell-cell adhesion (GO:0022409)	1/34	0.345961	0.506027	0.330164	0.481502	-0.742699	0.788322	ANK3
T cell differentiation (GO:0030217)	1/39	0.385588	0.530139	0.367482	0.501081	-0.822439	0.783773	BLK
purine ribonucleoside monophosphate metabolic process (GO:0009167)	1/40	0.393221	0.532279	0.374694	0.504448	-0.836626	0.780892	HSPA1A
positive regulation of protein localization to plasma membrane (GO:1903078)	1/44	0.422823	0.552101	0.402733	0.524646	-0.905823	0.779735	EPHA3
positive regulation of organelle organization (GO:0010638)	1/34	0.345961	0.506027	0.330164	0.481502	-0.733925	0.77901	MGARP
myelination (GO:0042552)	1/38	0.377858	0.522892	0.360188	0.495762	-0.799148	0.777759	CNTNAP1
regulation of fibroblast proliferation (GO:0048145)	1/47	0.444076	0.567092	0.422939	0.539175	-0.953554	0.774057	S100A6
negative regulation of catabolic process (GO:0009895)	1/41	0.40076	0.535666	0.381824	0.507622	-0.844331	0.772049	PRKCG
skeletal muscle tissue development (GO:0007519)	1/40	0.393221	0.532279	0.374694	0.504448	-0.825915	0.770895	POPDC2
regulation of autophagy (GO:0010506)	4/204	0.247595	0.447228	0.212286	0.410638	-0.549597	0.767215	SH3BP4;FBXL2;RNF152;OPTN
determination of left/right symmetry (GO:0007368)	1/43	0.41556	0.548554	0.395843	0.521141	-0.872575	0.766233	STIL
positive regulation of interleukin-6 production (GO:0032755)	1/44	0.422823	0.552101	0.402733	0.524646	-0.888797	0.765078	INAVA
positive regulation of osteoblast differentiation (GO:0045669)	1/36	0.362108	0.514975	0.345347	0.488454	-0.749739	0.761594	NPNT
protein modification by small protein conjugation (GO:0032446)	7/399	0.227671	0.437428	0.180458	0.398791	-0.514109	0.760807	TOP2A;UBE2C;BIRC5;LMO7;FBXL2;RNF152;AURKB
embryonic heart tube morphogenesis (GO:0003143)	1/41	0.40076	0.535666	0.381824	0.507622	-0.830461	0.759367	STIL
cellular response to fibroblast growth factor stimulus (GO:0044344)	2/95	0.329951	0.500302	0.302375	0.467473	-0.683191	0.75753	FGF16;SHCBP1
neutrophil activation involved in immune response (GO:0002283)	8/484	0.253649	0.452858	0.198175	0.402568	-0.547291	0.750776	LGALS3;MMP25;AOC1;ITGAM;STBD1;PADI2;ADAM8;HSPA1A
response to glucagon (GO:0033762)	1/35	0.354085	0.511876	0.337798	0.486443	-0.723057	0.750691	ADCY4
positive regulation of blood vessel endothelial cell migration (GO:0043536)	1/46	0.437079	0.562013	0.416281	0.533886	-0.903642	0.747891	JCAD
epithelial cell differentiation (GO:0030855)	2/97	0.339007	0.50227	0.310768	0.472178	-0.689676	0.746047	LGALS3;PROX1
positive regulation of cytokine production (GO:0001819)	4/221	0.294131	0.479071	0.253655	0.432569	-0.608451	0.74458	INAVA;CCR2;HAVCR2;HSPA1A
negative regulation of programmed cell death (GO:0043069)	7/409	0.246037	0.447228	0.195948	0.400229	-0.530114	0.743365	LTK;STIL;ERBB2;BIRC5;EPHA3;FAM129B;HSPA1A
regulation of microtubule polymerization (GO:0031113)	1/36	0.362108	0.514975	0.345347	0.488454	-0.731546	0.743113	PSRC1
positive regulation of gene expression, epigenetic (GO:0045815)	1/48	0.450985	0.571504	0.429523	0.543381	-0.929933	0.740525	PADI2
sulfur compound catabolic process (GO:0044273)	1/36	0.362108	0.514975	0.345347	0.488454	-0.717234	0.728575	CHAC1
negative regulation of type I interferon production (GO:0032480)	1/45	0.429995	0.555302	0.409546	0.52752	-0.862617	0.728032	HAVCR2
positive regulation of locomotion (GO:0040017)	1/34	0.345961	0.506027	0.330164	0.481502	-0.6856	0.727716	CHMP4C
cell cycle G1/S phase transition (GO:0044843)	2/93	0.320861	0.493729	0.293966	0.463681	-0.639197	0.726607	CCNA2;CDKN2A
protein tetramerization (GO:0051262)	2/91	0.311741	0.491252	0.285542	0.458654	-0.620575	0.723331	ALDH1A3;TK1
endothelial cell migration (GO:0043542)	1/36	0.362108	0.514975	0.345347	0.488454	-0.711813	0.723068	EMP2
MAPK cascade (GO:0000165)	5/279	0.265574	0.457818	0.222427	0.41427	-0.54099	0.717278	FGF16;ERBB2;MAP3K20;CCR5;DUSP9
base-excision repair (GO:0006284)	1/38	0.377858	0.522892	0.360188	0.495762	-0.734865	0.715196	NEIL3
odontogenesis (GO:0042476)	1/42	0.408206	0.541728	0.388874	0.513782	-0.795654	0.712892	TGFB3
membrane protein proteolysis (GO:0033619)	1/36	0.362108	0.514975	0.345347	0.488454	-0.696089	0.707096	BACE2
negative regulation of cell differentiation (GO:0045596)	3/151	0.28847	0.473574	0.255561	0.432569	-0.568763	0.707066	WNT10B;MEIS1;SNAI2
regulation of cellular localization (GO:0060341)	1/41	0.40076	0.535666	0.381824	0.507622	-0.770002	0.704083	SPAG5
monovalent inorganic cation transport (GO:0015672)	2/105	0.374822	0.522892	0.344103	0.488454	-0.710693	0.697406	SLC36A3;SCN4B
Ras protein signal transduction (GO:0007265)	4/224	0.302472	0.483272	0.261131	0.437865	-0.577285	0.690297	CCNA2;CDKN2A;RAB26;RHOV
positive regulation of macroautophagy (GO:0016239)	1/45	0.429995	0.555302	0.409546	0.52752	-0.815145	0.687966	OPTN
ameboidal-type cell migration (GO:0001667)	1/41	0.40076	0.535666	0.381824	0.507622	-0.752009	0.68763	AMOTL1
ciliary basal body-plasma membrane docking (GO:0097711)	2/97	0.339007	0.50227	0.310768	0.472178	-0.624768	0.675833	NEK2;NINL
carboxylic acid transmembrane transport (GO:1905039)	1/36	0.362108	0.514975	0.345347	0.488454	-0.665283	0.675803	SLC36A3
regulation of interleukin-6 production (GO:0032675)	1/43	0.41556	0.548554	0.395843	0.521141	-0.764276	0.671132	INAVA
negative regulation of protein catabolic process (GO:0042177)	1/40	0.393221	0.532279	0.374694	0.504448	-0.71452	0.66692	PRKCG
eye development (GO:0001654)	1/44	0.422823	0.552101	0.402733	0.524646	-0.770703	0.663423	SH3PXD2B
regulation of cellular amine metabolic process (GO:0033238)	1/52	0.477779	0.59433	0.455117	0.564254	-0.892746	0.659388	NQO1
neural crest cell development (GO:0014032)	1/36	0.362108	0.514975	0.345347	0.488454	-0.648913	0.659173	SNAI2
peptide transport (GO:0015833)	1/42	0.408206	0.541728	0.388874	0.513782	-0.735084	0.658622	CENPF
protein complex subunit organization (GO:0071822)	1/46	0.437079	0.562013	0.416281	0.533886	-0.793718	0.656913	NUF2
positive regulation of phosphorylation (GO:0042327)	4/209	0.261127	0.457127	0.224256	0.416876	-0.488339	0.655716	LTK;DSCAM;ERBB2;EPHA3
macromolecule catabolic process (GO:0009057)	1/35	0.354085	0.511876	0.337798	0.486443	-0.630879	0.65499	BACE2
negative regulation of gene expression (GO:0010629)	10/619	0.240526	0.445451	0.179758	0.398791	-0.459375	0.654577	CCR1;CENPF;CDKN2A;BIRC5;PROX1;GLIS2;FAM129B;DKK3;HAVCR2;HSPA1A
positive regulation of interleukin-8 production (GO:0032757)	1/45	0.429995	0.555302	0.409546	0.52752	-0.774939	0.654033	HSPA1A
neurogenesis (GO:0022008)	1/51	0.471205	0.590097	0.448828	0.558783	-0.866563	0.652055	CHAC1
wound healing (GO:0042060)	1/51	0.471205	0.590097	0.448828	0.558783	-0.863025	0.649392	ERBB2
regulation of organelle assembly (GO:1902115)	1/48	0.450985	0.571504	0.429523	0.543381	-0.814482	0.648589	STIL
regulation of mitochondrion organization (GO:0010821)	1/49	0.45781	0.577694	0.436031	0.548817	-0.825184	0.644718	MGARP
cardiac ventricle morphogenesis (GO:0003208)	1/44	0.422823	0.552101	0.402733	0.524646	-0.746616	0.642689	PROX1
regulation of ossification (GO:0030278)	1/39	0.385588	0.530139	0.367482	0.501081	-0.665433	0.634149	SNAI2
determination of heart left/right asymmetry (GO:0061371)	1/41	0.40076	0.535666	0.381824	0.507622	-0.691135	0.631968	STIL
pattern recognition receptor signaling pathway (GO:0002221)	1/49	0.45781	0.577694	0.436031	0.548817	-0.808297	0.631524	INAVA
positive regulation of DNA repair (GO:0045739)	1/39	0.385588	0.530139	0.367482	0.501081	-0.660876	0.629806	PRKCG
positive regulation of epithelial cell proliferation (GO:0050679)	2/108	0.388054	0.531566	0.356477	0.495144	-0.663877	0.628433	ERBB2;PROX1
regulation of cellular component movement (GO:0051270)	1/47	0.444076	0.567092	0.422939	0.539175	-0.770859	0.625753	ERBB2
positive regulation of multi-organism process (GO:0043902)	1/38	0.377858	0.522892	0.360188	0.495762	-0.638409	0.621322	OPTN
regulation of intracellular transport (GO:0032386)	1/41	0.40076	0.535666	0.381824	0.507622	-0.678837	0.620723	SPAG5
negative regulation of ERBB signaling pathway (GO:1901185)	1/44	0.422823	0.552101	0.402733	0.524646	-0.720779	0.620448	ERBB2
proteolysis involved in cellular protein catabolic process (GO:0051603)	2/94	0.32541	0.499986	0.298172	0.465784	-0.547143	0.614262	CHMP4C;FBXO44
polyol metabolic process (GO:0019751)	1/48	0.450985	0.571504	0.429523	0.543381	-0.768246	0.61177	PLCD1
regulation of phosphoprotein phosphatase activity (GO:0043666)	1/36	0.362108	0.514975	0.345347	0.488454	-0.598992	0.608463	PPP4R4
regulation of metal ion transport (GO:0010959)	1/38	0.377858	0.522892	0.360188	0.495762	-0.621175	0.604549	ANK3
regulation of cellular metabolic process (GO:0031323)	1/42	0.408206	0.541728	0.388874	0.513782	-0.669778	0.600109	BCO2
regulation of extrinsic apoptotic signaling pathway via death domain receptors (GO:1902041)	1/40	0.393221	0.532279	0.374694	0.504448	-0.64103	0.598326	LGALS3
cellular divalent inorganic cation homeostasis (GO:0072503)	2/102	0.361476	0.514975	0.331654	0.483202	-0.586559	0.596858	CCR1;CCR2
cellular response to amino acid starvation (GO:0034198)	1/40	0.393221	0.532279	0.374694	0.504448	-0.638924	0.59636	RNF152
positive regulation of angiogenesis (GO:0045766)	2/104	0.370386	0.517845	0.339961	0.488454	-0.600433	0.596356	ADAM12;CCR3
nucleus organization (GO:0006997)	1/46	0.437079	0.562013	0.416281	0.533886	-0.719166	0.595211	CHMP4C
regulation of focal adhesion assembly (GO:0051893)	1/45	0.429995	0.555302	0.409546	0.52752	-0.70438	0.594483	EPHA3
cellular response to metal ion (GO:0071248)	2/101	0.357004	0.514975	0.327489	0.481502	-0.576395	0.593692	AOC1;ANK3
regulation of dendrite morphogenesis (GO:0048814)	1/45	0.429995	0.555302	0.409546	0.52752	-0.702155	0.592605	OBSL1
positive regulation of epithelial to mesenchymal transition (GO:0010718)	1/41	0.40076	0.535666	0.381824	0.507622	-0.645163	0.589932	TGFB3
negative regulation of tumor necrosis factor production (GO:0032720)	1/36	0.362108	0.514975	0.345347	0.488454	-0.578136	0.587278	HAVCR2
positive regulation of protein localization to cell periphery (GO:1904377)	1/47	0.444076	0.567092	0.422939	0.539175	-0.721487	0.585675	EPHA3
protein polyubiquitination (GO:0000209)	5/284	0.277396	0.4615	0.232801	0.424236	-0.455268	0.583794	UBE2C;FBXO27;LMO7;RNF152;FBXO44
DNA replication-independent nucleosome assembly (GO:0006336)	1/40	0.393221	0.532279	0.374694	0.504448	-0.624914	0.583283	KNL1
JAK-STAT cascade (GO:0007259)	1/41	0.40076	0.535666	0.381824	0.507622	-0.635645	0.581228	CCR2
cellular response to ionizing radiation (GO:0071479)	1/47	0.444076	0.567092	0.422939	0.539175	-0.711514	0.577578	MAP3K20
positive regulation of mitotic cell cycle (GO:0045931)	1/53	0.484272	0.6004	0.461336	0.569121	-0.792916	0.574951	NUSAP1
positive regulation of interferon-gamma production (GO:0032729)	1/44	0.422823	0.552101	0.402733	0.524646	-0.666739	0.573931	CCR2
regulation of reactive oxygen species metabolic process (GO:2000377)	1/50	0.464549	0.583233	0.442466	0.552711	-0.748393	0.573784	BCO2
cellular metal ion homeostasis (GO:0006875)	2/97	0.339007	0.50227	0.310768	0.472178	-0.530291	0.573634	CCR1;CCR2
heart contraction (GO:0060047)	1/45	0.429995	0.555302	0.409546	0.52752	-0.678737	0.572841	SCN4B
lymphocyte chemotaxis (GO:0048247)	1/45	0.429995	0.555302	0.409546	0.52752	-0.672654	0.567707	ADAM8
positive regulation of cell division (GO:0051781)	1/42	0.408206	0.541728	0.388874	0.513782	-0.632737	0.566921	AURKB
interleukin-1-mediated signaling pathway (GO:0070498)	2/96	0.334483	0.501884	0.306574	0.467473	-0.515261	0.564297	IL1R1;IL1R2
regulation of megakaryocyte differentiation (GO:0045652)	1/50	0.464549	0.583233	0.442466	0.552711	-0.730023	0.5597	SCIN
cartilage development (GO:0051216)	1/47	0.444076	0.567092	0.422939	0.539175	-0.684132	0.555351	WNT10B
cardiac muscle tissue development (GO:0048738)	1/37	0.370032	0.517845	0.352809	0.491425	-0.556437	0.55319	PROX1
positive regulation of cytokine biosynthetic process (GO:0042108)	1/41	0.40076	0.535666	0.381824	0.507622	-0.604368	0.552629	CCR2
adherens junction organization (GO:0034332)	1/45	0.429995	0.555302	0.409546	0.52752	-0.651608	0.549944	INAVA
regulation of calcium ion transport (GO:0051924)	1/53	0.484272	0.6004	0.461336	0.569121	-0.757193	0.549047	CCR1
positive regulation of chemotaxis (GO:0050921)	1/49	0.45781	0.577694	0.436031	0.548817	-0.699051	0.54617	CCR2
glutathione metabolic process (GO:0006749)	1/50	0.464549	0.583233	0.442466	0.552711	-0.705049	0.540552	CHAC1
RNA catabolic process (GO:0006401)	1/44	0.422823	0.552101	0.402733	0.524646	-0.627727	0.540349	HSPA1A
sprouting angiogenesis (GO:0002040)	1/45	0.429995	0.555302	0.409546	0.52752	-0.638002	0.538462	ESM1
Wnt signaling pathway (GO:0016055)	2/110	0.396807	0.535666	0.364681	0.50001	-0.578095	0.534336	WNT10B;SNAI2
plasma membrane invagination (GO:0099024)	2/104	0.370386	0.517845	0.339961	0.488454	-0.536798	0.533153	ITGAM;AURKB
B cell differentiation (GO:0030183)	1/53	0.484272	0.6004	0.461336	0.569121	-0.732108	0.530858	AICDA
carboxylic acid transport (GO:0046942)	1/52	0.477779	0.59433	0.455117	0.564254	-0.716658	0.529328	SLC1A4
cellular response to starvation (GO:0009267)	2/108	0.388054	0.531566	0.356477	0.495144	-0.550077	0.520709	AOC1;RNF152
positive regulation of vasculature development (GO:1904018)	2/105	0.374822	0.522892	0.344103	0.488454	-0.520844	0.511106	ADAM12;CCR3
monocyte chemotaxis (GO:0002548)	1/42	0.408206	0.541728	0.388874	0.513782	-0.567745	0.508689	LGALS3
alpha-amino acid catabolic process (GO:1901606)	1/40	0.393221	0.532279	0.374694	0.504448	-0.534624	0.499008	KYNU
negative regulation of protein metabolic process (GO:0051248)	1/44	0.422823	0.552101	0.402733	0.524646	-0.579357	0.498712	PRKCG
small GTPase mediated signal transduction (GO:0007264)	2/100	0.35252	0.511876	0.323318	0.478075	-0.477284	0.497639	CCNA2;CDKN2A
cell morphogenesis involved in differentiation (GO:0000904)	1/55	0.497016	0.611113	0.473561	0.580834	-0.700728	0.489902	PROX1
positive regulation of response to stimulus (GO:0048584)	1/55	0.497016	0.611113	0.473561	0.580834	-0.695926	0.486544	CDKN2A
positive regulation of cellular process (GO:0048522)	8/520	0.318044	0.493729	0.253136	0.432569	-0.423589	0.485248	ESM1;SAPCD2;LMNA;RTKN2;ERBB2;BIRC5;EMP2;PROX1
regulation of protein kinase B signaling (GO:0051896)	3/164	0.332493	0.501884	0.295643	0.465341	-0.42791	0.471187	FGF16;ERBB2;ADAM8
negative regulation of proteolysis (GO:0045861)	1/42	0.408206	0.541728	0.388874	0.513782	-0.525777	0.471087	CHAC1
positive regulation of apoptotic process (GO:0043065)	5/308	0.335369	0.501884	0.284308	0.457659	-0.430422	0.470247	TOP2A;WNT10B;SCIN;TGFB3;MAP3K20
regulation of multicellular organismal development (GO:2000026)	1/44	0.422823	0.552101	0.402733	0.524646	-0.545289	0.469386	EPHA3
sodium ion transport (GO:0006814)	1/59	0.521572	0.631399	0.497191	0.599933	-0.715988	0.466042	SCN4B
ceramide metabolic process (GO:0006672)	1/43	0.41556	0.548554	0.395843	0.521141	-0.527122	0.462881	FUT7
branching morphogenesis of an epithelial tube (GO:0048754)	1/44	0.422823	0.552101	0.402733	0.524646	-0.533873	0.459559	NPNT
positive regulation of developmental process (GO:0051094)	2/114	0.414137	0.548554	0.380968	0.507622	-0.518394	0.456995	LMNA;FAM129B
inorganic anion transport (GO:0015698)	1/45	0.429995	0.555302	0.409546	0.52752	-0.54063	0.456282	NMUR1
regulation of cytokine production (GO:0001817)	2/109	0.392438	0.532279	0.360584	0.495762	-0.487097	0.45562	SNAI2;CCR2
regulation of cellular ketone metabolic process (GO:0010565)	1/62	0.539202	0.645915	0.514219	0.61473	-0.733883	0.453294	NQO1
response to glucose (GO:0009749)	1/48	0.450985	0.571504	0.429523	0.543381	-0.565671	0.450455	KLRG1
regulation of cytoskeleton organization (GO:0051493)	2/96	0.334483	0.501884	0.306574	0.467473	-0.410114	0.449144	RHOV;EPHA3
protein localization to cell periphery (GO:1990778)	2/118	0.431216	0.556396	0.397079	0.522306	-0.524082	0.440829	EMP2;ANK3
negative regulation of ossification (GO:0030279)	1/46	0.437079	0.562013	0.416281	0.533886	-0.532538	0.44075	CCR1
cellular calcium ion homeostasis (GO:0006874)	2/124	0.456331	0.577694	0.420877	0.539175	-0.559032	0.438581	CCR1;CCR2
axonogenesis (GO:0007409)	4/224	0.302472	0.483272	0.261131	0.437865	-0.363118	0.434204	S100A6;ANK3;DSCAML1;FAM129B
positive regulation of protein import into nucleus (GO:0042307)	1/54	0.490684	0.605677	0.467483	0.5748	-0.606292	0.431653	TGFB3
positive regulation of I-kappaB kinase/NF-kappaB signaling (GO:0043123)	3/164	0.332493	0.501884	0.295643	0.465341	-0.387729	0.426943	LGALS1;S100A4;INAVA
peptidyl-tyrosine modification (GO:0018212)	1/52	0.477779	0.59433	0.455117	0.564254	-0.576981	0.426162	EPHA3
regulation of DNA metabolic process (GO:0051052)	1/47	0.444076	0.567092	0.422939	0.539175	-0.524621	0.425866	ESCO2
negative regulation of cellular macromolecule biosynthetic process (GO:2000113)	8/513	0.305239	0.48506	0.242067	0.427059	-0.35615	0.422629	CENPF;CDKN2A;TGFB3;BIRC5;PROX1;GLIS2;FAM129B;DKK3
negative regulation of viral life cycle (GO:1903901)	1/62	0.539202	0.645915	0.514219	0.61473	-0.68202	0.421259	PROX1
positive regulation of proteolysis (GO:0045862)	1/53	0.484272	0.6004	0.461336	0.569121	-0.56443	0.409273	ADAM8
circulatory system development (GO:0072359)	2/110	0.396807	0.535666	0.364681	0.50001	-0.441255	0.407855	POPDC2;SH3PXD2B
regulation of epithelial cell migration (GO:0010632)	1/49	0.45781	0.577694	0.436031	0.548817	-0.521027	0.407079	EMP2
nervous system development (GO:0007399)	7/456	0.337358	0.501884	0.274917	0.447379	-0.368838	0.400784	STIL;DSCAM;GDA;PROX1;CHAC1;NBL1;DSCAML1
positive regulation of NF-kappaB transcription factor activity (GO:0051092)	2/129	0.476766	0.59433	0.44034	0.552711	-0.537576	0.398198	ADAM8;HSPA1A
ATP metabolic process (GO:0046034)	1/57	0.509447	0.620759	0.485511	0.588265	-0.587732	0.396384	HSPA1A
cellular amide metabolic process (GO:0043603)	1/63	0.544934	0.650687	0.519767	0.618157	-0.652652	0.396219	FUT7
digestive tract development (GO:0048565)	1/44	0.422823	0.552101	0.402733	0.524646	-0.454836	0.391524	COBL
regulation of tumor necrosis factor production (GO:0032680)	1/62	0.539202	0.645915	0.514219	0.61473	-0.627413	0.387531	HAVCR2
negative regulation of nucleic acid-templated transcription (GO:1903507)	7/445	0.315425	0.493729	0.255655	0.432569	-0.331509	0.382506	CENPF;CDKN2A;BIRC5;PROX1;GLIS2;FAM129B;DKK3
organonitrogen compound catabolic process (GO:1901565)	1/57	0.509447	0.620759	0.485511	0.588265	-0.566378	0.381982	BACE2
protein heterooligomerization (GO:0051291)	1/50	0.464549	0.583233	0.442466	0.552711	-0.496649	0.380775	COL6A2
regulation of GTPase activity (GO:0043087)	3/189	0.416469	0.549267	0.373352	0.504448	-0.421565	0.369267	ERBB2;SH3BP4;EPHA3
protein homooligomerization (GO:0051260)	3/191	0.423067	0.552101	0.379531	0.507622	-0.429072	0.369098	ALDH1A3;TK1;MUC20
regulation of exocytosis (GO:0017157)	1/52	0.477779	0.59433	0.455117	0.564254	-0.49859	0.368262	RAB26
adenylate cyclase-inhibiting G-protein coupled receptor signaling pathway (GO:0007193)	1/64	0.550595	0.655344	0.525251	0.620713	-0.610604	0.364382	ADCY4
IRE1-mediated unfolded protein response (GO:0036498)	1/58	0.515548	0.626653	0.491384	0.594372	-0.547681	0.362853	LMNA
positive regulation of cell motility (GO:2000147)	3/180	0.386505	0.530909	0.345428	0.488454	-0.380364	0.361578	CCR1;CARMIL1;SNAI2
regulation of tumor necrosis factor-mediated signaling pathway (GO:0010803)	1/57	0.509447	0.620759	0.485511	0.588265	-0.528799	0.356637	HSPA1A
inositol phosphate metabolic process (GO:0043647)	1/48	0.450985	0.571504	0.429523	0.543381	-0.442918	0.352704	PLCD1
positive regulation of JUN kinase activity (GO:0043507)	1/51	0.471205	0.590097	0.448828	0.558783	-0.468689	0.35267	MAP3K20
regulation of pathway-restricted SMAD protein phosphorylation (GO:0060393)	1/60	0.527522	0.636017	0.502932	0.604411	-0.550969	0.35238	TGFB3
neutrophil migration (GO:1990266)	1/59	0.521572	0.631399	0.497191	0.599933	-0.536038	0.348911	LGALS3
DNA damage response, signal transduction by p53 class mediator resulting in cell cycle arrest (GO:0006977)	1/63	0.544934	0.650687	0.519767	0.618157	-0.571878	0.347182	CDC25C
negative regulation of cellular response to transforming growth factor beta stimulus (GO:1903845)	1/54	0.490684	0.605677	0.467483	0.5748	-0.483262	0.344061	HSPA1A
response to organic cyclic compound (GO:0014070)	1/70	0.583116	0.677798	0.556876	0.64478	-0.635689	0.342872	KYNU
muscle organ development (GO:0007517)	1/61	0.533399	0.642062	0.508608	0.610739	-0.54551	0.342845	ITGA11
regulation of neuron projection development (GO:0010975)	2/120	0.439657	0.56484	0.405062	0.527218	-0.410247	0.337124	LTK;EPHA3
regulation of protein secretion (GO:0050708)	2/108	0.388054	0.531566	0.356477	0.495144	-0.354767	0.335826	TGFB3;ADAM8
cellular response to heat (GO:0034605)	1/48	0.450985	0.571504	0.429523	0.543381	-0.421481	0.335634	HSPA1A
regulation of TOR signaling (GO:0032006)	1/68	0.572544	0.671274	0.546574	0.637313	-0.600644	0.334958	SH3BP4
negative regulation of dephosphorylation (GO:0035305)	1/64	0.550595	0.655344	0.525251	0.620713	-0.541671	0.323246	KNL1
Golgi organization (GO:0007030)	2/122	0.448029	0.571504	0.412996	0.531504	-0.401265	0.322175	OBSL1;OPTN
extrinsic apoptotic signaling pathway (GO:0097191)	1/68	0.572544	0.671274	0.546574	0.637313	-0.575366	0.320861	CD70
regulation of extrinsic apoptotic signaling pathway (GO:2001236)	1/60	0.527522	0.636017	0.502932	0.604411	-0.499484	0.319452	LGALS3
diterpenoid metabolic process (GO:0016101)	1/63	0.544934	0.650687	0.519767	0.618157	-0.52274	0.317351	BCO2
regulation of cell migration (GO:0030334)	5/317	0.357427	0.514975	0.304187	0.467473	-0.307386	0.316246	CCR1;CARMIL1;LMNA;SNAI2;AMOTL1
negative regulation of transforming growth factor beta receptor signaling pathway (GO:0030512)	1/56	0.503271	0.616765	0.47957	0.585792	-0.460005	0.315852	HSPA1A
endocytosis (GO:0006897)	4/264	0.414584	0.548554	0.363499	0.499308	-0.35572	0.313204	CUBN;STAB1;AMPH;RHOV
regulation of cellular catabolic process (GO:0031329)	1/56	0.503271	0.616765	0.47957	0.585792	-0.453111	0.311118	FBXL2
myofibril assembly (GO:0030239)	1/48	0.450985	0.571504	0.429523	0.543381	-0.390509	0.310971	OBSL1
regulation of cellular amino acid metabolic process (GO:0006521)	1/52	0.477779	0.59433	0.455117	0.564254	-0.419711	0.310001	NQO1
cellular response to growth factor stimulus (GO:0071363)	2/140	0.520039	0.630569	0.481865	0.58763	-0.471854	0.308522	ERBB2;SNAI2
positive regulation of protein modification by small protein conjugation or removal (GO:1903322)	1/66	0.561706	0.664321	0.536034	0.630454	-0.534683	0.308392	INAVA
granulocyte chemotaxis (GO:0071621)	1/57	0.509447	0.620759	0.485511	0.588265	-0.455761	0.307378	LGALS3
positive regulation of pathway-restricted SMAD protein phosphorylation (GO:0010862)	1/48	0.450985	0.571504	0.429523	0.543381	-0.385531	0.307006	TGFB3
positive regulation of growth (GO:0045927)	1/72	0.593426	0.682853	0.566945	0.650872	-0.578388	0.301827	ERBB2
SCF-dependent proteasomal ubiquitin-dependent protein catabolic process (GO:0031146)	1/73	0.598486	0.68287	0.571893	0.65153	-0.587829	0.301763	FBXL2
negative regulation of epithelial cell proliferation (GO:0050680)	1/67	0.567159	0.668646	0.541334	0.634183	-0.530678	0.300956	SNAI2
regulation of secretion by cell (GO:1903530)	1/57	0.509447	0.620759	0.485511	0.588265	-0.445651	0.30056	RAB26
regulation of hydrolase activity (GO:0051336)	1/81	0.63677	0.709163	0.609513	0.677793	-0.663486	0.299462	EPHA3
phospholipid metabolic process (GO:0006644)	1/71	0.588303	0.68064	0.561939	0.648123	-0.560016	0.297096	PLCD1
cellular response to peptide hormone stimulus (GO:0071375)	2/111	0.401162	0.535722	0.368769	0.501916	-0.322336	0.294418	ADCY4;MGARP
positive regulation of DNA metabolic process (GO:0051054)	1/83	0.645759	0.712248	0.618392	0.681559	-0.663847	0.29032	TGFB3
positive regulation of T cell proliferation (GO:0042102)	1/62	0.539202	0.645915	0.514219	0.61473	-0.461857	0.285273	CCR2
negative regulation of hydrolase activity (GO:0051346)	2/109	0.392438	0.532279	0.360584	0.495762	-0.303929	0.284288	SH3BP4;KNL1
protein targeting to mitochondrion (GO:0006626)	1/55	0.497016	0.611113	0.473561	0.580834	-0.403249	0.281925	MGARP
glycosaminoglycan catabolic process (GO:0006027)	1/57	0.509447	0.620759	0.485511	0.588265	-0.415149	0.279989	HMMR
defense response to Gram-negative bacterium (GO:0050829)	1/72	0.593426	0.682853	0.566945	0.650872	-0.52993	0.27654	OPTN
Rab protein signal transduction (GO:0032482)	1/71	0.588303	0.68064	0.561939	0.648123	-0.519643	0.275677	RAB26
neutrophil chemotaxis (GO:0030593)	1/54	0.490684	0.605677	0.467483	0.5748	-0.386269	0.275006	LGALS3
cilium movement (GO:0003341)	1/50	0.464549	0.583233	0.442466	0.552711	-0.349468	0.267933	MAATS1
regulation of phosphatase activity (GO:0010921)	1/73	0.598486	0.68287	0.571893	0.65153	-0.515334	0.264548	KNL1
negative regulation of ubiquitin-protein ligase activity involved in mitotic cell cycle (GO:0051436)	1/72	0.593426	0.682853	0.566945	0.650872	-0.505371	0.263724	UBE2C
negative regulation of protein serine/threonine kinase activity (GO:0071901)	1/68	0.572544	0.671274	0.546574	0.637313	-0.470228	0.26223	CDKN2A
regulation of neuron death (GO:1901214)	1/73	0.598486	0.68287	0.571893	0.65153	-0.510647	0.262142	ITGAM
nucleic acid metabolic process (GO:0090304)	1/81	0.63677	0.709163	0.609513	0.677793	-0.579015	0.261337	TK1
positive regulation of cellular amide metabolic process (GO:0034250)	1/62	0.539202	0.645915	0.514219	0.61473	-0.423031	0.261291	ERBB2
negative regulation of ubiquitin protein ligase activity (GO:1904667)	1/78	0.622859	0.701011	0.595807	0.670564	-0.539748	0.255536	UBE2C
regulation of endothelial cell proliferation (GO:0001936)	1/80	0.632191	0.708301	0.604996	0.676814	-0.552237	0.253236	PROX1
positive regulation of endothelial cell migration (GO:0010595)	1/71	0.588303	0.68064	0.561939	0.648123	-0.476628	0.252857	PROX1
positive regulation of proteasomal ubiquitin-dependent protein catabolic process (GO:0032436)	1/71	0.588303	0.68064	0.561939	0.648123	-0.473379	0.251134	HSPA1A
regulation of innate immune response (GO:0045088)	1/70	0.583116	0.677798	0.556876	0.64478	-0.456692	0.246326	ADAM8
Rho protein signal transduction (GO:0007266)	1/73	0.598486	0.68287	0.571893	0.65153	-0.463509	0.237943	RHOV
generation of neurons (GO:0048699)	2/131	0.48481	0.600567	0.448026	0.558783	-0.325693	0.235801	WNT10B;PROX1
regulation of cellular response to heat (GO:1900034)	1/79	0.627554	0.704166	0.600428	0.673194	-0.50281	0.234272	HSPA1A
response to interleukin-1 (GO:0070555)	1/77	0.618105	0.69777	0.591133	0.666311	-0.485759	0.233697	IL1R1
central nervous system development (GO:0007417)	3/218	0.509166	0.620759	0.461229	0.569121	-0.345847	0.23344	PROX1;DSCAML1;SHROOM4
cellular response to light stimulus (GO:0071482)	1/67	0.567159	0.668646	0.541334	0.634183	-0.409431	0.232195	AURKB
Notch signaling pathway (GO:0007219)	1/56	0.503271	0.616765	0.47957	0.585792	-0.337096	0.231459	SNAI2
water-soluble vitamin metabolic process (GO:0006767)	1/78	0.622859	0.701011	0.595807	0.670564	-0.482526	0.228445	CUBN
regulation of actin filament polymerization (GO:0030833)	1/69	0.577863	0.675383	0.551754	0.641344	-0.41627	0.22829	CARMIL1
positive regulation of cell death (GO:0010942)	1/58	0.515548	0.626653	0.491384	0.594372	-0.343628	0.227662	ITGAM
positive regulation of ubiquitin-protein ligase activity involved in regulation of mitotic cell cycle transition (GO:0051437)	1/77	0.618105	0.69777	0.591133	0.666311	-0.471266	0.226724	UBE2C
B cell activation (GO:0042113)	1/74	0.603483	0.686468	0.576786	0.655099	-0.448708	0.226614	AICDA
hemopoiesis (GO:0030097)	1/77	0.618105	0.69777	0.591133	0.666311	-0.470109	0.226168	RTKN2
positive regulation of protein catabolic process (GO:0045732)	1/82	0.641292	0.711008	0.613978	0.680218	-0.505565	0.224607	ADAM8
muscle contraction (GO:0006936)	2/138	0.51235	0.623785	0.474454	0.58145	-0.333622	0.223109	NMUR1;OBSL1
inflammatory response (GO:0006954)	4/253	0.383841	0.530139	0.335069	0.486443	-0.231334	0.221509	MMP25;HRH4;ADAM8;KLRG1
positive regulation of macromolecule biosynthetic process (GO:0010557)	2/143	0.531422	0.6402	0.49286	0.595673	-0.349476	0.220938	TGFB3;ERBB2
visual perception (GO:0007601)	1/79	0.627554	0.704166	0.600428	0.673194	-0.468957	0.218499	COL18A1
negative regulation of canonical Wnt signaling pathway (GO:0090090)	2/149	0.553631	0.657906	0.514408	0.61473	-0.365747	0.21625	SNAI2;DKK3
regulation of cation channel activity (GO:2001257)	1/72	0.593426	0.682853	0.566945	0.650872	-0.412951	0.215495	ANK3
positive regulation of neurogenesis (GO:0050769)	1/70	0.583116	0.677798	0.556876	0.64478	-0.395511	0.213327	NBL1
regulation of cellular component organization (GO:0051128)	2/141	0.523854	0.633132	0.485546	0.588265	-0.327215	0.211559	ERMN;IL17RB
positive regulation of cytokine secretion (GO:0050715)	1/74	0.603483	0.686468	0.576786	0.655099	-0.418783	0.211501	HAVCR2
protein targeting (GO:0006605)	2/134	0.49673	0.611113	0.459444	0.569121	-0.295889	0.207036	MGARP;OPTN
ERBB signaling pathway (GO:0038127)	1/81	0.63677	0.709163	0.609513	0.677793	-0.458314	0.206859	ERBB2
positive regulation of stress-activated MAPK cascade (GO:0032874)	1/81	0.63677	0.709163	0.609513	0.677793	-0.45309	0.204501	INAVA
organic substance transport (GO:0071702)	1/88	0.667273	0.730029	0.639723	0.698861	-0.500413	0.202445	CUBN
C-terminal protein lipidation (GO:0006501)	1/76	0.613292	0.694442	0.586405	0.66299	-0.413624	0.202227	LYPD3
stress-activated protein kinase signaling cascade (GO:0031098)	1/71	0.588303	0.68064	0.561939	0.648123	-0.379456	0.201306	MAP3K20
C-terminal protein amino acid modification (GO:0018410)	1/83	0.645759	0.712248	0.618392	0.681559	-0.456642	0.199703	LYPD3
intracellular steroid hormone receptor signaling pathway (GO:0030518)	1/67	0.567159	0.668646	0.541334	0.634183	-0.351399	0.199284	PADI2
regulation of cell death (GO:0010941)	1/97	0.702771	0.75938	0.675175	0.727976	-0.560871	0.197833	HSPA1A
transforming growth factor beta receptor signaling pathway (GO:0007179)	1/77	0.618105	0.69777	0.591133	0.666311	-0.410564	0.197521	TGFB3
calcium ion transmembrane transport (GO:0070588)	1/87	0.663077	0.727041	0.635554	0.69635	-0.477956	0.196375	CACNA1G
regulation of establishment of planar polarity (GO:0090175)	1/90	0.675509	0.736335	0.64792	0.705228	-0.498992	0.195749	SAPCD2
positive regulation of translation (GO:0045727)	1/79	0.627554	0.704166	0.600428	0.673194	-0.419865	0.195626	ERBB2
synapse assembly (GO:0007416)	1/64	0.550595	0.655344	0.525251	0.620713	-0.327482	0.195427	DSCAM
actomyosin structure organization (GO:0031032)	1/72	0.593426	0.682853	0.566945	0.650872	-0.371815	0.194029	OBSL1
negative regulation of phosphorylation (GO:0042326)	1/76	0.613292	0.694442	0.586405	0.66299	-0.394876	0.19306	CDKN2A
protein localization to nucleus (GO:0034504)	1/97	0.702771	0.75938	0.675175	0.727976	-0.546845	0.192886	LMNA
cellular response to UV (GO:0034644)	1/68	0.572544	0.671274	0.546574	0.637313	-0.344732	0.192245	AURKB
regulation of phosphatidylinositol 3-kinase signaling (GO:0014066)	1/81	0.63677	0.709163	0.609513	0.677793	-0.419906	0.189523	FBXL2
monocarboxylic acid biosynthetic process (GO:0072330)	1/69	0.577863	0.675383	0.551754	0.641344	-0.345303	0.189371	ALDH1A3
organelle assembly (GO:0070925)	5/377	0.502681	0.616765	0.439199	0.552338	-0.274531	0.188822	CENPF;ABLIM3;SH3PXD2B;CHMP4C;NEK2
cell morphogenesis (GO:0000902)	1/60	0.527522	0.636017	0.502932	0.604411	-0.295218	0.188811	ADAM8
positive regulation of epithelial cell migration (GO:0010634)	1/75	0.608418	0.691026	0.581623	0.659586	-0.379499	0.18857	PROX1
regulation of neuron differentiation (GO:0045664)	1/85	0.654526	0.718723	0.627071	0.688576	-0.443426	0.187944	NBL1
positive regulation of signal transduction (GO:0009967)	3/207	0.474833	0.594139	0.428406	0.543381	-0.251402	0.187242	ESM1;EMP2;JCAD
glucose metabolic process (GO:0006006)	1/65	0.556185	0.660414	0.530673	0.625632	-0.318915	0.187093	TKTL1
negative regulation of cysteine-type endopeptidase activity involved in apoptotic process (GO:0043154)	1/69	0.577863	0.675383	0.551754	0.641344	-0.340021	0.186474	BIRC5
regulation of protein serine/threonine kinase activity (GO:0071900)	1/81	0.63677	0.709163	0.609513	0.677793	-0.409631	0.184886	CDC25C
epidermis development (GO:0008544)	1/82	0.641292	0.711008	0.613978	0.680218	-0.407726	0.18114	LAMA3
positive regulation of protein ubiquitination (GO:0031398)	1/84	0.650169	0.716052	0.622757	0.685355	-0.418549	0.180195	INAVA
negative regulation of cell death (GO:0060548)	1/82	0.641292	0.711008	0.613978	0.680218	-0.403816	0.179403	HSPA1A
protein ubiquitination (GO:0016567)	7/507	0.440507	0.565444	0.368091	0.501452	-0.217011	0.177912	UBE2C;FBXO27;BIRC5;LMO7;FBXL2;RNF152;FBXO44
regulation of transcription from RNA polymerase II promoter in response to stress (GO:0043618)	1/94	0.691379	0.750337	0.663761	0.716708	-0.480394	0.177298	HSPA1A
positive regulation of transmembrane receptor protein serine/threonine kinase signaling pathway (GO:0090100)	1/83	0.645759	0.712248	0.618392	0.681559	-0.404458	0.176881	TGFB3
cellular response to interleukin-1 (GO:0071347)	2/151	0.560868	0.664321	0.521456	0.619523	-0.305798	0.176834	IL1R1;IL1R2
regulation of ubiquitin-protein ligase activity involved in mitotic cell cycle (GO:0051439)	1/73	0.598486	0.68287	0.571893	0.65153	-0.342514	0.17583	UBE2C
signal transduction involved in mitotic G1 DNA damage checkpoint (GO:0072431)	1/64	0.550595	0.655344	0.525251	0.620713	-0.288685	0.172275	CDC25C
negative regulation of protein binding (GO:0032091)	1/68	0.572544	0.671274	0.546574	0.637313	-0.308277	0.171915	AURKB
positive regulation of cell growth (GO:0030307)	1/99	0.710132	0.761258	0.682569	0.730658	-0.492823	0.168695	ERBB2
metal ion transport (GO:0030001)	1/102	0.720835	0.769407	0.693349	0.739539	-0.512209	0.167669	SCN4B
protein modification process (GO:0036211)	1/85	0.654526	0.718723	0.627071	0.688576	-0.390234	0.165399	FBXL2
regulation of protein localization to plasma membrane (GO:1903076)	1/68	0.572544	0.671274	0.546574	0.637313	-0.294114	0.164017	EPHA3
cellular protein complex assembly (GO:0043623)	2/145	0.538908	0.645915	0.500109	0.602966	-0.263325	0.16279	CENPF;HSPA1A
regulation of protein processing (GO:0070613)	2/129	0.476766	0.59433	0.44034	0.552711	-0.20704	0.15336	ADAM8;CHAC1
protein stabilization (GO:0050821)	2/153	0.568021	0.669132	0.528437	0.623983	-0.271142	0.153357	WNT10B;HSPA1A
chemical synaptic transmission (GO:0007268)	4/290	0.485636	0.601091	0.430309	0.543913	-0.209612	0.151402	NQO1;GAD1;SLC1A4;AMPH
regulation of T cell proliferation (GO:0042129)	1/63	0.544934	0.650687	0.519767	0.618157	-0.245906	0.149287	LGALS3
establishment of protein localization to mitochondrion (GO:0072655)	1/50	0.464549	0.583233	0.442466	0.552711	-0.194605	0.149202	MGARP
regulation of fat cell differentiation (GO:0045598)	1/73	0.598486	0.68287	0.571893	0.65153	-0.271431	0.13934	WNT10B
purine ribonucleotide biosynthetic process (GO:0009152)	1/76	0.613292	0.694442	0.586405	0.66299	-0.284429	0.139061	ADCY4
regulation of programmed cell death (GO:0043067)	3/269	0.651107	0.716554	0.600856	0.673194	-0.323665	0.138879	LGALS1;TGFB3;BIRC5
adenylate cyclase-activating G-protein coupled receptor signaling pathway (GO:0007189)	1/79	0.627554	0.704166	0.600428	0.673194	-0.295688	0.137769	ADCY4
cell-cell junction organization (GO:0045216)	1/73	0.598486	0.68287	0.571893	0.65153	-0.268028	0.137593	TGFB3
response to cytokine (GO:0034097)	2/139	0.516204	0.62694	0.478167	0.585519	-0.20776	0.137381	IL1R1;KYNU
response to endoplasmic reticulum stress (GO:0034976)	1/107	0.737805	0.782473	0.710511	0.752455	-0.445122	0.135351	CHAC1
response to UV (GO:0009411)	1/99	0.710132	0.761258	0.682569	0.730658	-0.39515	0.135262	AURKB
receptor-mediated endocytosis (GO:0006898)	2/189	0.682389	0.742375	0.64206	0.7009	-0.353586	0.135125	CUBN;STAB1
cytosolic transport (GO:0016482)	1/119	0.774458	0.81209	0.747905	0.783695	-0.528465	0.135071	EMP2
cell-cell junction assembly (GO:0007043)	1/80	0.632191	0.708301	0.604996	0.676814	-0.293746	0.134701	CNTNAP1
DNA damage response, signal transduction by p53 class mediator (GO:0030330)	1/83	0.645759	0.712248	0.618392	0.681559	-0.296458	0.12965	CDC25C
inorganic cation transmembrane transport (GO:0098662)	2/141	0.523854	0.633132	0.485546	0.588265	-0.197986	0.128006	SCN4B;CACNA1G
cellular protein localization (GO:0034613)	4/328	0.582513	0.677798	0.524128	0.620713	-0.229129	0.123822	CNTNAP1;RAB26;SH3PXD2B;EMP2
response to tumor necrosis factor (GO:0034612)	1/98	0.706475	0.760544	0.678893	0.729871	-0.342612	0.119047	NPNT
viral life cycle (GO:0019058)	1/108	0.741074	0.78538	0.713828	0.754893	-0.395981	0.118658	CHMP4C
protein transport (GO:0015031)	4/327	0.580097	0.676932	0.521747	0.619523	-0.209109	0.113873	CENPF;RAB26;ANK3;OPTN
peptide metabolic process (GO:0006518)	1/105	0.731144	0.777069	0.703764	0.747969	-0.358079	0.112131	BACE2
positive regulation of cellular protein metabolic process (GO:0032270)	1/92	0.683543	0.742375	0.655931	0.710313	-0.292981	0.111469	ERBB2
sphingolipid metabolic process (GO:0006665)	1/117	0.768725	0.807215	0.742024	0.779178	-0.422053	0.111009	FUT7
G1/S transition of mitotic cell cycle (GO:0000082)	1/106	0.734495	0.780074	0.707157	0.750433	-0.35395	0.109219	CDKN2A
protein processing (GO:0016485)	1/102	0.720835	0.769407	0.693349	0.739539	-0.32886	0.107651	GZMB
plasma membrane bounded cell projection assembly (GO:0120031)	3/242	0.579745	0.676932	0.52981	0.625109	-0.192447	0.104916	CARMIL1;ABLIM3;EMP2
cellular response to hormone stimulus (GO:0032870)	1/81	0.63677	0.709163	0.609513	0.677793	-0.231669	0.104563	MGARP
purine ribonucleotide metabolic process (GO:0009150)	1/67	0.567159	0.668646	0.541334	0.634183	-0.183927	0.104308	HSPA1A
O-glycan processing (GO:0016266)	1/66	0.561706	0.664321	0.536034	0.630454	-0.18057	0.104149	MUC20
positive regulation of cell differentiation (GO:0045597)	2/195	0.698852	0.756793	0.658768	0.712082	-0.2852	0.102192	TGFB3;NPNT
regulation of cell communication (GO:0010646)	1/72	0.593426	0.682853	0.566945	0.650872	-0.194425	0.101459	BIRC5
negative regulation of cytokine production (GO:0001818)	1/111	0.750639	0.793624	0.723551	0.763549	-0.346253	0.099316	HAVCR2
tumor necrosis factor-mediated signaling pathway (GO:0033209)	1/124	0.78818	0.823002	0.762031	0.795139	-0.41352	0.0984295	CD70
positive regulation of cellular component organization (GO:0051130)	1/107	0.737805	0.782473	0.710511	0.752455	-0.315485	0.0959311	TGFB3
protein dephosphorylation (GO:0006470)	1/126	0.793433	0.826169	0.767458	0.798006	-0.411712	0.0952642	DUSP9
positive regulation of T cell activation (GO:0050870)	1/69	0.577863	0.675383	0.551754	0.641344	-0.16776	0.0920024	CCR2
regulation of acute inflammatory response (GO:0002673)	1/122	0.782794	0.818526	0.756477	0.791008	-0.3603	0.0882323	ADAM8
regulation of macromolecule metabolic process (GO:0060255)	1/130	0.803553	0.833792	0.777946	0.806659	-0.389901	0.0852759	PROX1
regulation of organelle organization (GO:0033043)	1/114	0.759851	0.800867	0.732947	0.772369	-0.310354	0.0852334	MGARP
toll-like receptor signaling pathway (GO:0002224)	1/87	0.663077	0.727041	0.635554	0.69635	-0.202405	0.0831609	ITGAM
regulation of insulin secretion (GO:0050796)	1/99	0.710132	0.761258	0.682569	0.730658	-0.241748	0.0827515	BLK
positive regulation of plasma membrane bounded cell projection assembly (GO:0120034)	1/70	0.583116	0.677798	0.556876	0.64478	-0.153166	0.0826133	TGFB3
steroid metabolic process (GO:0008202)	1/100	0.713744	0.764579	0.686204	0.734021	-0.24339	0.0820786	CUBN
positive regulation of protein ubiquitination involved in ubiquitin-dependent protein catabolic process (GO:2000060)	1/88	0.667273	0.730029	0.639723	0.698861	-0.201314	0.0814429	UBE2C
T cell activation (GO:0042110)	1/89	0.671417	0.73241	0.643845	0.701306	-0.20291	0.0808325	BLK
phosphate-containing compound metabolic process (GO:0006796)	2/184	0.668116	0.730415	0.627653	0.688707	-0.196679	0.0793193	PRKCG;PLCD1
positive regulation of ubiquitin protein ligase activity (GO:1904668)	1/83	0.645759	0.712248	0.618392	0.681559	-0.178945	0.0782577	UBE2C
negative regulation of Wnt signaling pathway (GO:0030178)	2/175	0.641132	0.711008	0.600604	0.673194	-0.172371	0.076622	SNAI2;DKK3
dephosphorylation (GO:0016311)	1/125	0.790823	0.824028	0.76476	0.796313	-0.31764	0.074544	DUSP9
mRNA metabolic process (GO:0016071)	1/98	0.706475	0.760544	0.678893	0.729871	-0.210966	0.0733039	HSPA1A
positive regulation of cellular biosynthetic process (GO:0031328)	2/160	0.592392	0.682853	0.552323	0.641504	-0.138966	0.0727607	TGFB3;ERBB2
regulation of protein catabolic process (GO:0042176)	1/92	0.683543	0.742375	0.655931	0.710313	-0.189624	0.0721454	PRKCG
ion transport (GO:0006811)	3/290	0.70037	0.757886	0.651058	0.70761	-0.202164	0.072	TMEM63C;AQP4;UNC79
positive regulation of proteasomal protein catabolic process (GO:1901800)	1/74	0.603483	0.686468	0.576786	0.655099	-0.136618	0.0689972	HSPA1A
plasma membrane bounded cell projection organization (GO:0120036)	1/119	0.774458	0.81209	0.747905	0.783695	-0.260878	0.0666781	CARMIL1
positive regulation of protein complex assembly (GO:0031334)	1/89	0.671417	0.73241	0.643845	0.701306	-0.167035	0.066541	TPPP3
protein lipidation (GO:0006497)	1/128	0.798557	0.830343	0.772762	0.802401	-0.284485	0.0639948	LYPD3
modification-dependent protein catabolic process (GO:0019941)	1/142	0.831045	0.85635	0.806672	0.83066	-0.344607	0.0637768	UBE2C
platelet degranulation (GO:0002576)	1/125	0.790823	0.824028	0.76476	0.796313	-0.265518	0.0623119	TGFB3
positive regulation of sequence-specific DNA binding transcription factor activity (GO:0051091)	2/216	0.750985	0.793624	0.712382	0.753899	-0.213986	0.0612792	ADAM8;HSPA1A
cAMP-mediated signaling (GO:0019933)	1/76	0.613292	0.694442	0.586405	0.66299	-0.124463	0.0608515	ADCY4
protein O-linked glycosylation (GO:0006493)	1/116	0.765804	0.805853	0.739033	0.777682	-0.227461	0.0606934	MUC20
macroautophagy (GO:0016236)	1/111	0.750639	0.793624	0.723551	0.763549	-0.207972	0.0596528	CHMP4C
BMP signaling pathway (GO:0030509)	1/82	0.641292	0.711008	0.613978	0.680218	-0.132908	0.0590471	TGFB3
regulation of cellular response to stress (GO:0080135)	1/105	0.731144	0.777069	0.703764	0.747969	-0.185647	0.0581345	HSPA1A
regulation of vesicle-mediated transport (GO:0060627)	1/139	0.824554	0.851429	0.799857	0.825927	-0.288393	0.0556345	RAB26
glycoprotein biosynthetic process (GO:0009101)	1/73	0.598486	0.68287	0.571893	0.65153	-0.108091	0.0554888	FUT7
response to molecule of bacterial origin (GO:0002237)	1/99	0.710132	0.761258	0.682569	0.730658	-0.160607	0.0549765	INAVA
neuron differentiation (GO:0030182)	2/140	0.520039	0.630569	0.481865	0.58763	-0.0776156	0.0507491	WNT10B;PROX1
sensory perception of light stimulus (GO:0050953)	1/82	0.641292	0.711008	0.613978	0.680218	-0.112149	0.0498246	COL18A1
regulation of signal transduction by p53 class mediator (GO:1901796)	1/139	0.824554	0.851429	0.799857	0.825927	-0.25727	0.0496305	AURKB
cellular response to organic substance (GO:0071310)	1/134	0.81318	0.84202	0.787964	0.81591	-0.235577	0.0487181	ERBB2
cellular response to BMP stimulus (GO:0071773)	1/88	0.667273	0.730029	0.639723	0.698861	-0.113353	0.0458577	TGFB3
mitochondrion organization (GO:0007005)	1/168	0.878164	0.896836	0.856858	0.873878	-0.345329	0.0448657	MGARP
positive regulation of cell cycle arrest (GO:0071158)	1/83	0.645759	0.712248	0.618392	0.681559	-0.101993	0.0446047	CDC25C
cellular response to tumor necrosis factor (GO:0071356)	2/195	0.698852	0.756793	0.658768	0.712082	-0.123067	0.0440971	CD70;NPNT
regulation of primary metabolic process (GO:0080090)	1/140	0.826745	0.8531	0.802155	0.827726	-0.223018	0.0424312	NQO1
antigen processing and presentation of peptide antigen via MHC class II (GO:0002495)	1/99	0.710132	0.761258	0.682569	0.730658	-0.109489	0.0374785	KIF2C
negative regulation of cell cycle (GO:0045786)	1/73	0.598486	0.68287	0.571893	0.65153	-0.072251	0.0370902	CDKN2A
sulfur compound biosynthetic process (GO:0044272)	1/123	0.785504	0.820783	0.75927	0.793371	-0.14375	0.0347055	CHAC1
negative regulation of binding (GO:0051100)	1/83	0.645759	0.712248	0.618392	0.681559	-0.074526	0.0325924	AURKB
cellular response to molecule of bacterial origin (GO:0071219)	1/85	0.654526	0.718723	0.627071	0.688576	-0.074176	0.0314391	CCR5
regulation of protein phosphorylation (GO:0001932)	2/262	0.838679	0.863022	0.805538	0.830067	-0.178666	0.0314322	TGFB3;ERBB2
anterograde trans-synaptic signaling (GO:0098916)	2/241	0.802779	0.833569	0.766879	0.797961	-0.13078	0.0287292	GAD1;AMPH
skeletal system development (GO:0001501)	1/147	0.841336	0.864561	0.817522	0.84009	-0.163815	0.0283014	SH3PXD2B
retrograde vesicle-mediated transport, Golgi to ER (GO:0006890)	1/81	0.63677	0.709163	0.609513	0.677793	-0.0595067	0.0268582	KIF2C
stimulatory C-type lectin receptor signaling pathway (GO:0002223)	1/122	0.782794	0.818526	0.756477	0.791008	-0.107376	0.0262947	MUC20
innate immune response activating cell surface receptor signaling pathway (GO:0002220)	1/125	0.790823	0.824028	0.76476	0.796313	-0.0974145	0.0228613	MUC20
regulation of canonical Wnt signaling pathway (GO:0060828)	2/214	0.746375	0.790435	0.707594	0.750433	-0.077535	0.0226811	SNAI2;DKK3
regulation of small GTPase mediated signal transduction (GO:0051056)	1/141	0.828908	0.85474	0.804427	0.829495	-0.119917	0.0225019	RHOV
cellular response to oxidative stress (GO:0034599)	1/116	0.765804	0.805853	0.739033	0.777682	-0.0760489	0.0202921	HSPA1A
positive regulation of GTPase activity (GO:0043547)	1/193	0.911067	0.9241	0.892839	0.904995	-0.203894	0.0189905	ERBB2
protein maturation (GO:0051604)	1/84	0.650169	0.716052	0.622757	0.685355	-0.0439467	0.01892	GZMB
endosomal transport (GO:0016197)	2/230	0.781282	0.818093	0.744093	0.780799	-0.0693491	0.0171167	CHMP4C;EMP2
positive regulation of protein kinase activity (GO:0045860)	1/173	0.885594	0.902567	0.864905	0.880276	-0.133028	0.0161624	EMP2
DNA-templated transcription, initiation (GO:0006352)	1/187	0.904084	0.918895	0.885123	0.899624	-0.15444	0.0155726	TEAD3
positive regulation of protein modification process (GO:0031401)	1/164	0.871875	0.891636	0.850079	0.868749	-0.103613	0.0142062	ERBB2
antigen processing and presentation of exogenous peptide antigen via MHC class II (GO:0019886)	1/98	0.706475	0.760544	0.678893	0.729871	-0.0382835	0.0133023	KIF2C
DNA metabolic process (GO:0006259)	3/315	0.751933	0.794063	0.704793	0.748529	-0.0435564	0.0124183	TOP2A;TK1;CDC25C
regulation of proteasomal ubiquitin-dependent protein catabolic process (GO:0032434)	1/89	0.671417	0.73241	0.643845	0.701306	-0.0283689	0.0113012	HSPA1A
regulation of mRNA stability (GO:0043488)	1/129	0.801071	0.832376	0.775369	0.804547	-0.0493424	0.0109444	HSPA1A
mitochondrial transport (GO:0006839)	1/136	0.817815	0.845643	0.792804	0.819781	-0.0449485	0.00904	MGARP
negative regulation of intracellular signal transduction (GO:1902532)	1/162	0.868611	0.888908	0.84657	0.865758	-0.0596465	0.00840183	SH3BP4
regulation of JNK cascade (GO:0046328)	1/91	0.679551	0.740199	0.651948	0.70806	-0.0215409	0.00832175	MAPK8IP1
intrinsic apoptotic signaling pathway (GO:0097193)	1/102	0.720835	0.769407	0.693349	0.739539	-0.0228256	0.00747185	CHAC1
cellular response to DNA damage stimulus (GO:0006974)	2/330	0.917979	0.930477	0.894575	0.906137	-0.0757671	0.00648421	TOP2A;MAP3K20
regulation of inflammatory response (GO:0050727)	1/167	0.876621	0.895874	0.855192	0.872777	-0.0475075	0.00625579	CCR2
cellular protein metabolic process (GO:0044267)	5/485	0.721774	0.769857	0.658998	0.712082	-0.0188102	0.00613295	LGALS1;TMEM132A;MSRB3;IGFBP7;FBXL2
protein modification by small protein removal (GO:0070646)	1/262	0.962775	0.96994	0.951929	0.959014	-0.135919	0.00515622	CCNA2
regulation of epithelial cell proliferation (GO:0050678)	1/73	0.598486	0.68287	0.571893	0.65153	-0.00953634	0.0048955	ERBB2
cellular response to transforming growth factor beta stimulus (GO:0071560)	1/101	0.717312	0.767848	0.689797	0.737335	-0.0126209	0.00419324	TGFB3
antigen receptor-mediated signaling pathway (GO:0050851)	1/258	0.960844	0.96865	0.949637	0.957353	-0.0922429	0.0036845	BLK
antigen processing and presentation of exogenous peptide antigen (GO:0002478)	1/98	0.706475	0.760544	0.678893	0.729871	-0.00985893	0.00342567	KIF2C
ubiquitin-dependent protein catabolic process (GO:0006511)	1/342	0.98649	0.989814	0.981116	0.983758	-0.0844532	0.00114872	UBE2C
cilium organization (GO:0044782)	1/193	0.911067	0.9241	0.892839	0.904995	-0.00271664	0.000253026	ABLIM3
transmembrane transport (GO:0055085)	2/379	0.950602	0.960275	0.933479	0.942978	0.00597023	-0.000302453	AQP4;UNC79
transcription from RNA polymerase II promoter (GO:0006366)	2/486	0.984353	0.989003	0.976675	0.981288	0.0282577	-0.00044563	ZBTB32;TEAD3
proteasome-mediated ubiquitin-dependent protein catabolic process (GO:0043161)	3/292	0.704776	0.760544	0.655599	0.710313	0.00273593	-0.000957235	UBE2C;FBXL2;AURKB
regulation of immune response (GO:0050776)	1/252	0.957759	0.966849	0.945994	0.954973	0.049764	-0.00214778	MADCAM1
cellular macromolecule biosynthetic process (GO:0034645)	1/368	0.990291	0.990956	0.986077	0.98674	0.272562	-0.00265938	CDC25C
regulation of protein binding (GO:0043393)	1/112	0.753748	0.795415	0.726719	0.766349	0.0103514	-0.00292631	AURKB
DNA replication (GO:0006260)	1/121	0.78005	0.817379	0.753653	0.789162	0.0118002	-0.00293114	CDC25C
regulation of nucleic acid-templated transcription (GO:1903506)	2/608	0.995999	0.995999	0.99331	0.99331	0.800756	-0.00321011	AIRE;KLRG1
intracellular protein transport (GO:0006886)	1/348	0.987481	0.990141	0.982397	0.984381	0.274369	-0.00345643	RAB26
regulation of transcription from RNA polymerase II promoter (GO:0006357)	10/1479	0.9899	0.990956	0.978975	0.982273	0.426467	-0.00432916	AIRE;TGFB3;TSHZ2;ERBB2;ZBTB32;SNAI2;PROX1;AURKB;GLIS2;TEAD3
viral process (GO:0016032)	1/221	0.93752	0.948323	0.922561	0.932582	0.0680611	-0.00439112	CHMP4C
regulation of cellular macromolecule biosynthetic process (GO:2000112)	3/632	0.985903	0.989814	0.977591	0.981546	0.350518	-0.00497653	AIRE;ESCO2;KLRG1
negative regulation of transcription from RNA polymerase II promoter (GO:0000122)	6/566	0.706912	0.760544	0.637156	0.697592	0.0168069	-0.00582945	ZBTB32;SNAI2;PROX1;AURKB;GLIS2;HSPA1A
transcription, DNA-templated (GO:0006351)	1/357	0.988834	0.99083	0.98416	0.985483	0.533427	-0.00598993	ZBTB32
DNA repair (GO:0006281)	1/289	0.973547	0.980129	0.96491	0.970778	0.226279	-0.00606636	NEIL3
chromatin remodeling (GO:0006338)	1/117	0.768725	0.807215	0.742024	0.779178	0.0274124	-0.00721006	PADI2
axon guidance (GO:0007411)	1/159	0.863558	0.884954	0.841154	0.861402	0.0533639	-0.00782819	FAM129B
peptidyl-serine phosphorylation (GO:0018105)	1/146	0.839329	0.863094	0.815401	0.838489	0.0570582	-0.0099939	PRKCG
protein deubiquitination (GO:0016579)	1/258	0.960844	0.96865	0.949637	0.957353	0.251033	-0.0100271	CCNA2
positive regulation of transcription from RNA polymerase II promoter (GO:0045944)	5/849	0.981681	0.986984	0.969169	0.974404	0.551777	-0.0102019	AIRE;TGFB3;PROX1;GLIS2;TEAD3
apoptotic process (GO:0006915)	3/232	0.551108	0.655431	0.501796	0.604411	0.0185878	-0.0110751	PRUNE2;GZMB;RNF152
cilium assembly (GO:0060271)	3/289	0.698149	0.756793	0.648772	0.70564	0.0372299	-0.0133776	ABLIM3;NEK2;NINL
regulation of gene expression (GO:0010468)	7/1038	0.975597	0.98153	0.957602	0.964077	0.588704	-0.0145441	CCR1;AIRE;PROX1;ANK3;KLRG1;HAVCR2;HSPA1A
protein oligomerization (GO:0051259)	1/218	0.93511	0.946552	0.919816	0.930439	0.261829	-0.0175665	MUC20
proteasomal protein catabolic process (GO:0010498)	2/238	0.797109	0.829417	0.760844	0.794458	0.0798961	-0.0181175	UBE2C;FBXO44
regulation of translation (GO:0006417)	1/214	0.931752	0.943795	0.916005	0.927214	0.270711	-0.0191363	ERBB2
cellular response to lipopolysaccharide (GO:0071222)	1/92	0.683543	0.742375	0.655931	0.710313	0.0503265	-0.0191475	CCR5
ion transmembrane transport (GO:0034220)	2/220	0.75999	0.800867	0.721761	0.762741	0.0732915	-0.0201149	AQP4;UNC79
peptidyl-serine modification (GO:0018209)	1/171	0.882678	0.900828	0.861742	0.878257	0.177156	-0.0221081	PRKCG
response to lipopolysaccharide (GO:0032496)	1/156	0.858311	0.88079	0.835548	0.856839	0.174523	-0.0266651	CCR5
positive regulation of hydrolase activity (GO:0051345)	1/173	0.885594	0.902567	0.864905	0.880276	0.220831	-0.0268301	ERBB2
B cell receptor signaling pathway (GO:0050853)	1/105	0.731144	0.777069	0.703764	0.747969	0.0952675	-0.0298325	BLK
ER to Golgi vesicle-mediated transport (GO:0006888)	1/181	0.896556	0.911866	0.876856	0.891829	0.313004	-0.0341785	ANK3
chloride transport (GO:0006821)	1/74	0.603483	0.686468	0.576786	0.655099	0.0683214	-0.0345049	NMUR1
defense response to bacterium (GO:0042742)	2/242	0.804638	0.834335	0.768861	0.798907	0.175345	-0.0381135	STAB1;OPTN
proteolysis (GO:0006508)	4/292	0.490969	0.605677	0.435388	0.548817	0.0571639	-0.040665	BACE2;MMP25;GZMB;FBXL2
heart development (GO:0007507)	2/150	0.55726	0.660779	0.517941	0.61796	0.072635	-0.0424714	POPDC2;SH3PXD2B
positive regulation of lymphocyte activation (GO:0051251)	1/105	0.731144	0.777069	0.703764	0.747969	0.151916	-0.0475718	CCR2
vesicle-mediated transport (GO:0016192)	3/411	0.88729	0.903676	0.853846	0.872001	0.411259	-0.0491799	AMPH;RHOV;MAPK8IP1
transcription initiation from RNA polymerase II promoter (GO:0006367)	1/161	0.866947	0.887816	0.844786	0.864526	0.355174	-0.0507107	TEAD3
neuron projection development (GO:0031175)	2/168	0.618977	0.698225	0.578569	0.656623	0.106296	-0.0509886	CNTNAP1;NBL1
regulation of transcription, DNA-templated (GO:0006355)	14/1599	0.938133	0.948323	0.889427	0.902766	0.800218	-0.0511051	CDKN2A;AIRE;TGFB3;TSHZ2;PROX1;GLIS2;FAM129B;DKK3;CENPF;PSRC1;ERBB2;BIRC5;KLRG1;TEAD3
protein complex assembly (GO:0006461)	1/190	0.907641	0.921881	0.889048	0.902766	0.569028	-0.0551424	SH3PXD2B
Golgi vesicle transport (GO:0048193)	2/272	0.853612	0.876571	0.821875	0.843981	0.390335	-0.0617819	KIF2C;ANK3
positive regulation of macromolecule metabolic process (GO:0010604)	2/277	0.860597	0.882527	0.829577	0.851302	0.426528	-0.064034	ANK3;HSPA1A
phagocytosis (GO:0006909)	1/136	0.817815	0.845643	0.792804	0.819781	0.343824	-0.0691496	ITGAM
phagocytosis, engulfment (GO:0006911)	1/105	0.731144	0.777069	0.703764	0.747969	0.232879	-0.0729247	ITGAM
protein glycosylation (GO:0006486)	1/131	0.806005	0.835172	0.780494	0.808737	0.340084	-0.0733442	FUT7
positive regulation of transcription, DNA-templated (GO:0045893)	10/1121	0.894098	0.909988	0.836889	0.857624	0.655672	-0.0733957	PSRC1;AIRE;TGFB3;RASL11A;ERBB2;PADI2;PROX1;GLIS2;FAM129B;TEAD3
transmembrane receptor protein serine/threonine kinase signaling pathway (GO:0007178)	1/145	0.837297	0.862196	0.813257	0.836862	0.428723	-0.0761313	TGFB3
positive regulation of multicellular organismal process (GO:0051240)	2/203	0.719699	0.769407	0.680074	0.730613	0.256012	-0.0842081	TGFB3;FAM129B
positive regulation of gene expression (GO:0010628)	9/772	0.622058	0.701011	0.532385	0.627153	0.206175	-0.0978757	PSRC1;AIRE;TGFB3;ERBB2;PROX1;ANK3;GLIS2;FAM129B;HSPA1A
regulation of intracellular signal transduction (GO:1902531)	5/423	0.604928	0.687586	0.539	0.633442	0.196482	-0.0987609	TGFB3;RHOV;FBXL2;OPTN;AURKB
cellular response to interferon-gamma (GO:0071346)	1/117	0.768725	0.807215	0.742024	0.779178	0.395034	-0.103903	AQP4
positive regulation of protein phosphorylation (GO:0001934)	5/413	0.5837	0.677948	0.517918	0.61796	0.287715	-0.154896	LTK;TGFB3;ERBB2;EPHA3;JCAD
negative regulation of transcription, DNA-templated (GO:0045892)	10/814	0.55738	0.660779	0.462772	0.57042	0.334973	-0.195795	CENPF;CDKN2A;ZBTB32;BIRC5;SNAI2;PROX1;AURKB;GLIS2;FAM129B;DKK3
positive regulation of nucleic acid-templated transcription (GO:1903508)	6/503	0.595235	0.68287	0.522688	0.620145	0.431468	-0.223845	PSRC1;AIRE;TGFB3;PROX1;GLIS2;FAM129B

## Sheet: Upreg TL1A_IL2vIso-Molec
Supplemental Table 4. GO Molecular Function Analysis of upregulated genes in TL1A-Ig/IL-2 versus Isotype Control treated Treg. 285 upregulated genes (adjusted p<0.05 and fold increase >1.5) were analyzed using the Enrichr analysis tool [27,28].
Term	Overlap	P-value	Adjusted P-value	Old P-value	Old Adjusted P-value	Z-score	Combined Score	Genes
C-C chemokine binding (GO:0019957)	3/9	0.000223381	0.00753617	0.000402769	0.0127544	-3.38489	28.4555	CCR1;CCR5;CCR3
G-protein coupled chemoattractant receptor activity (GO:0001637)	4/16	6.33246e-05	0.0036095	0.000102214	0.00582623	-2.55073	24.6585	CCR1;CCR5;CCR3;CCR2
cyclin-dependent protein serine/threonine kinase inhibitor activity (GO:0004861)	3/11	0.000429625	0.0122443	0.000654118	0.0155353	-2.65874	20.6122	CDKN1A;CDKN2B;CDKN2A
microtubule motor activity (GO:0003777)	7/61	2.44925e-05	0.00232679	2.3033e-05	0.00218813	-1.84212	19.558	CENPE;KIF18B;KIF14;KIF2C;KIF23;KIF11;KIF15
chemokine receptor activity (GO:0004950)	4/22	0.000237984	0.00753617	0.000297309	0.0105916	-2.15424	17.9735	CCR1;CCR5;CCR3;CCR2
cyclin-dependent protein serine/threonine kinase regulator activity (GO:0016538)	5/28	4.19091e-05	0.00298602	5.42964e-05	0.00386862	-1.72589	17.397	CDKN1A;CDKN2B;CCNB1;CDKN2A;CKS1B
microtubule binding (GO:0008017)	15/196	1.42704e-07	4.06708e-05	6.795e-08	1.93658e-05	-1.07797	16.9916	GAS2L3;SPAG5;KIF14;KIF23;KIF11;MID2;SKA1;KIF15;CENPE;PSRC1;KIF18B;MAP1A;NUSAP1;BIRC5;KIF2C
cyclin-dependent protein kinase activity (GO:0097472)	5/35	0.000127632	0.00606254	0.000140183	0.00665868	-1.835	16.4533	CCNA2;CCNB2;CDKN1A;CCNB1;CDK1
actin binding (GO:0003779)	11/255	0.00110006	0.0261263	0.000562729	0.0145798	-2.33303	15.8935	MYL4;ANLN;GAS2L3;SCIN;ABLIM3;MAP1A;FSCN1;COBL;CCR5;OBSL1;SHROOM4
tubulin binding (GO:0015631)	16/256	8.5543e-07	0.000121899	3.31868e-07	4.72911e-05	-1.07169	14.9733	GAS2L3;SPAG5;KIF14;KIF23;KIF11;MID2;SKA1;KIF15;CENPE;PSRC1;KIF18B;MAP1A;STMN1;NUSAP1;BIRC5;KIF2C
histone kinase activity (GO:0035173)	2/10	0.00838678	0.103923	0.00967651	0.0908309	-3.00977	14.39	CDK1;AURKB
chemokine binding (GO:0019956)	3/18	0.00197391	0.0401832	0.00223977	0.0425557	-2.14485	13.3576	CCR1;CCR5;CCR3
cytokine receptor activity (GO:0004896)	6/74	0.000641653	0.0166247	0.000518417	0.0145798	-1.78576	13.128	CCR1;IL1RL1;IL1R2;CCR5;CCR3;CCR2
motor activity (GO:0003774)	7/86	0.000223122	0.00753617	0.000172971	0.00704237	-1.56093	13.124	CENPE;KIF18B;KIF14;KIF2C;KIF23;KIF11;KIF15
L-proline transmembrane transporter activity (GO:0015193)	2/8	0.0053172	0.0757701	0.00670798	0.0843552	-2.44687	12.8138	SLC36A3;SLC1A4
alanine transmembrane transporter activity (GO:0022858)	2/8	0.0053172	0.0757701	0.00670798	0.0843552	-2.43928	12.774	SLC36A3;SLC1A4
L-alanine transmembrane transporter activity (GO:0015180)	2/8	0.0053172	0.0757701	0.00670798	0.0843552	-2.43203	12.7361	SLC36A3;SLC1A4
protein serine/threonine kinase inhibitor activity (GO:0030291)	3/31	0.00949336	0.108224	0.0089388	0.0908309	-2.61202	12.1646	CDKN1A;CDKN2B;CDKN2A
BMP binding (GO:0036122)	2/10	0.00838678	0.103923	0.00967651	0.0908309	-2.51006	12.0009	SOSTDC1;NBL1
cyclin-dependent protein serine/threonine kinase activity (GO:0004693)	4/34	0.00131988	0.0289358	0.0013049	0.0286075	-1.76546	11.7054	CCNB2;CDKN1A;CCNB1;CDK1
voltage-gated ion channel activity involved in regulation of postsynaptic membrane potential (GO:1905030)	3/24	0.00459805	0.0757701	0.00466012	0.0737853	-2.08681	11.2315	CACNA1I;SCN4B;CACNA1G
voltage-gated sodium channel activity (GO:0005248)	3/24	0.00459805	0.0757701	0.00466012	0.0737853	-2.0651	11.1146	CACNA1I;SCN4B;CACNA1G
cytochrome-b5 reductase activity, acting on NAD(P)H (GO:0004128)	1/7	0.0952781	0.40022	0.096975	0.391137	-4.32486	10.1676	NQO1
ATPase activity (GO:0016887)	8/204	0.00890792	0.105782	0.00554288	0.0831432	-2.1503	10.1512	CENPE;KIF18B;KIF14;KIF2C;KIF23;KIF11;KIF15;HSPA1A
C3HC4-type RING finger domain binding (GO:0055131)	1/7	0.0952781	0.40022	0.096975	0.391137	-3.75539	8.82876	HSPA1A
leukotriene receptor activity (GO:0004974)	1/7	0.0952781	0.40022	0.096975	0.391137	-3.5912	8.44276	CYSLTR1
cysteinyl leukotriene receptor activity (GO:0001631)	1/7	0.0952781	0.40022	0.096975	0.391137	-3.59031	8.44067	CYSLTR1
ATP-dependent microtubule motor activity, plus-end-directed (GO:0008574)	3/32	0.0103672	0.109431	0.00968745	0.0908309	-1.73875	7.94452	KIF18B;KIF14;KIF11
BMP receptor activity (GO:0098821)	1/7	0.0952781	0.40022	0.096975	0.391137	-3.36744	7.91671	SOSTDC1
GTP-Rho binding (GO:0017049)	2/18	0.0264666	0.221852	0.026077	0.206443	-2.17461	7.8979	ANLN;RTKN2
patched binding (GO:0005113)	1/7	0.0952781	0.40022	0.096975	0.391137	-3.35385	7.88474	CCNB1
solute:proton symporter activity (GO:0015295)	2/22	0.0385077	0.296613	0.0366579	0.250386	-2.383	7.76117	SLC36A3;SLC2A6
cadherin binding (GO:0045296)	10/314	0.0146792	0.144261	0.00816045	0.0908309	-1.81462	7.66012	ANLN;CCNB2;KRT18;DIAPH3;ARHGEF16;FSCN1;H1FX;CIP2A;FAM129B;HSPA1A
5'-3' DNA helicase activity (GO:0043139)	1/7	0.0952781	0.40022	0.096975	0.391137	-3.23434	7.60378	PIF1
actin filament binding (GO:0051015)	6/128	0.00997824	0.109377	0.0071036	0.0843552	-1.6405	7.55837	MYL4;SCIN;ABLIM3;FSCN1;OBSL1;SHROOM4
kinase binding (GO:0019900)	13/419	0.00717937	0.0974343	0.00331003	0.0589599	-1.47805	7.29644	CDKN1A;CDKN2B;CDKN2A;KIF14;KIF11;RHOC;CDC25C;AURKB;CKS1B;CCNA2;TPX2;CCNB1;RHOV
primary amine oxidase activity (GO:0008131)	1/7	0.0952781	0.40022	0.096975	0.391137	-3.09006	7.26459	AOC1
voltage-gated calcium channel activity (GO:0005245)	3/38	0.0165698	0.15009	0.0149342	0.133008	-1.76976	7.25634	CACNA1I;CACNB4;CACNA1G
aryl hydrocarbon receptor binding (GO:0017162)	1/9	0.120799	0.419851	0.119722	0.399885	-3.34921	7.07898	ARNT2
sodium channel activity (GO:0005272)	3/41	0.0202995	0.175314	0.0180526	0.155909	-1.71121	6.66886	CACNA1I;SCN4B;CACNA1G
histone serine kinase activity (GO:0035174)	1/8	0.10813	0.40022	0.10842	0.391137	-2.95224	6.56704	AURKB
LBD domain binding (GO:0050693)	1/7	0.0952781	0.40022	0.096975	0.391137	-2.77456	6.52287	PROX1
neutral amino acid transmembrane transporter activity (GO:0015175)	2/25	0.0486469	0.330104	0.0454904	0.288106	-2.10094	6.3515	SLC36A3;SLC1A4
protein binding involved in cell-matrix adhesion (GO:0098634)	1/8	0.10813	0.40022	0.10842	0.391137	-2.80683	6.24359	MADCAM1
MAP kinase tyrosine/serine/threonine phosphatase activity (GO:0017017)	1/8	0.10813	0.40022	0.10842	0.391137	-2.77002	6.16169	DUSP9
aldehyde dehydrogenase [NAD(P)+] activity (GO:0004030)	1/7	0.0952781	0.40022	0.096975	0.391137	-2.61776	6.15424	ALDH1A3
cation:sugar symporter activity (GO:0005402)	1/8	0.10813	0.40022	0.10842	0.391137	-2.7567	6.13207	SLC2A6
alpha-(1->3)-fucosyltransferase activity (GO:0046920)	1/9	0.120799	0.419851	0.119722	0.399885	-2.88897	6.10619	FUT7
cation:amino acid symporter activity (GO:0005416)	1/7	0.0952781	0.40022	0.096975	0.391137	-2.46973	5.80624	SLC36A3
glycine transmembrane transporter activity (GO:0015187)	1/8	0.10813	0.40022	0.10842	0.391137	-2.56419	5.70384	SLC36A3
myosin heavy chain binding (GO:0032036)	1/8	0.10813	0.40022	0.10842	0.391137	-2.54406	5.65907	MYL4
protein kinase binding (GO:0019901)	15/496	0.00507338	0.0757701	0.002063	0.0419968	-1.05709	5.5854	TOP2A;CDKN1A;LTK;CDKN2B;CDKN2A;KIF14;ADCY4;KIF11;RHOC;CDC25C;CKS1B;CCNA2;TPX2;CCNB1;RHOV
phosphatidylinositol phospholipase C activity (GO:0004435)	2/25	0.0486469	0.330104	0.0454904	0.288106	-1.8155	5.48855	CCR1;CCR5
retinal dehydrogenase activity (GO:0001758)	1/8	0.10813	0.40022	0.10842	0.391137	-2.46087	5.47403	ALDH1A3
ATP-dependent microtubule motor activity (GO:1990939)	3/49	0.0323137	0.263126	0.0280079	0.215736	-1.56982	5.38803	KIF18B;KIF14;KIF11
RAGE receptor binding (GO:0050786)	1/10	0.133289	0.435319	0.130881	0.399885	-2.66724	5.37511	S100A4
transcriptional repressor activity, RNA polymerase II core promoter proximal region sequence-specific binding (GO:0001078)	5/98	0.012967	0.131985	0.00987985	0.0908309	-1.22946	5.34243	BCL11A;TSHZ2;SNAI2;PROX1;E2F8
protein homodimerization activity (GO:0042803)	15/665	0.0532264	0.337101	0.0253603	0.206443	-1.81537	5.32486	TOP2A;CUBN;AOC1;ACTN3;GZMA;CIP2A;MID2;ALDH1A3;CENPF;KYNU;S100A6;NBL1;DSCAML1;KLRG1;CCR2
sodium-dependent phosphate transmembrane transporter activity (GO:0015321)	1/8	0.10813	0.40022	0.10842	0.391137	-2.3321	5.18758	SLC17A7
cytoskeletal adaptor activity (GO:0008093)	1/10	0.133289	0.435319	0.130881	0.399885	-2.56467	5.16841	OBSL1
ATP-dependent DNA helicase activity (GO:0004003)	2/29	0.0634639	0.361744	0.0583344	0.321106	-1.8439	5.08417	PIF1;BRIP1
L-amino acid transmembrane transporter activity (GO:0015179)	3/50	0.0340258	0.269371	0.02942	0.21993	-1.42934	4.83206	SLC36A3;SLC17A7;SLC1A4
superoxide-generating NADPH oxidase activator activity (GO:0016176)	1/10	0.133289	0.435319	0.130881	0.399885	-2.37749	4.7912	SH3PXD2B
D-glucose transmembrane transporter activity (GO:0055056)	1/10	0.133289	0.435319	0.130881	0.399885	-2.35193	4.73969	SLC2A6
hydrolase activity, acting on carbon-nitrogen (but not peptide) bonds, in linear amidines (GO:0016813)	1/11	0.145603	0.435319	0.1419	0.399885	-2.43704	4.69587	PADI2
protein serine/threonine kinase activity (GO:0004674)	11/369	0.0168522	0.15009	0.00891902	0.0908309	-1.14972	4.69462	CCNB2;CDKN1A;DYRK3;CCNB1;CDK1;PBK;MAP3K20;NEK2;MASTL;AURKB;CIT
3-chloroallyl aldehyde dehydrogenase activity (GO:0004028)	1/9	0.120799	0.419851	0.119722	0.399885	-2.19708	4.64381	ALDH1A3
bubble DNA binding (GO:0000405)	1/8	0.10813	0.40022	0.10842	0.391137	-2.06339	4.58986	NEIL3
kinesin binding (GO:0019894)	2/29	0.0634639	0.361744	0.0583344	0.321106	-1.66435	4.58907	KIF18B;MAPK8IP1
actin monomer binding (GO:0003785)	2/26	0.0522188	0.337101	0.0485919	0.301058	-1.50247	4.43576	MYL4;COBL
hydrogen:amino acid symporter activity (GO:0005280)	1/7	0.0952781	0.40022	0.096975	0.391137	-1.85661	4.36481	SLC36A3
MAP kinase phosphatase activity (GO:0033549)	1/10	0.133289	0.435319	0.130881	0.399885	-2.1393	4.31118	DUSP9
Rho GTPase binding (GO:0017048)	3/73	0.0854953	0.40022	0.0717705	0.378789	-1.74374	4.28838	ANLN;ARHGEF16;RTKN2
protein serine/threonine kinase activator activity (GO:0043539)	2/32	0.0754371	0.40022	0.0686861	0.36935	-1.65851	4.28634	CCNB1;CKS1B
purine ribonucleoside triphosphate binding (GO:0035639)	10/397	0.0579794	0.358539	0.0340741	0.242778	-1.49552	4.25874	TPX2;PIF1;DYRK3;MLKL;RAB26;KIF14;MAP3K20;RHOV;RHOC;HSPA1A
phospholipase C activity (GO:0004629)	2/28	0.0596305	0.358539	0.0550162	0.319992	-1.49458	4.2141	CCR1;CCR5
protein kinase activity (GO:0004672)	14/514	0.0156116	0.14831	0.00707548	0.0843552	-1.00116	4.16459	CDKN1A;DYRK3;LTK;BUB1B;MASTL;AURKB;CIT;CCNA2;FGF16;CDK1;PBK;MAP3K20;NEK2;BUB1
protein tyrosine/serine/threonine phosphatase activity (GO:0008138)	2/35	0.0880578	0.40022	0.0795882	0.391137	-1.70747	4.14876	DUSP9;CDKN3
high voltage-gated calcium channel activity (GO:0008331)	1/13	0.169709	0.435319	0.163522	0.399885	-2.32891	4.13072	CACNB4
galanin receptor activity (GO:0004966)	1/12	0.157742	0.435319	0.152779	0.399885	-2.23603	4.12949	CYSLTR1
sodium:phosphate symporter activity (GO:0005436)	1/11	0.145603	0.435319	0.1419	0.399885	-2.12708	4.09862	SLC17A7
phosphatidylinositol-5-phosphate binding (GO:0010314)	1/11	0.145603	0.435319	0.1419	0.399885	-2.09542	4.0376	SH3PXD2B
integrin binding (GO:0005178)	4/95	0.0464729	0.330104	0.036899	0.250386	-1.31002	4.0203	ESM1;ACTN3;MADCAM1;WISP1
hexose transmembrane transporter activity (GO:0015149)	1/14	0.181507	0.435319	0.17413	0.399885	-2.33698	3.98797	SLC2A6
sodium:amino acid symporter activity (GO:0005283)	1/13	0.169709	0.435319	0.163522	0.399885	-2.16599	3.84174	SLC6A13
microtubule plus-end binding (GO:0051010)	1/13	0.169709	0.435319	0.163522	0.399885	-2.14426	3.80321	KIF2C
adenyl ribonucleotide binding (GO:0032559)	8/280	0.0472257	0.330104	0.0300957	0.21993	-1.2363	3.77418	POPDC2;TPX2;PIF1;DYRK3;MLKL;KIF14;MAP3K20;HSPA1A
transcriptional repressor activity, RNA polymerase II transcription regulatory region sequence-specific binding (GO:0001227)	5/160	0.0782983	0.40022	0.0585878	0.321106	-1.4633	3.72737	BCL11A;TSHZ2;SNAI2;PROX1;E2F8
oxidoreductase activity, acting on the CH-NH2 group of donors, oxygen as acceptor (GO:0016641)	1/16	0.204604	0.441758	0.194946	0.405544	-2.30729	3.66092	AOC1
fucosyltransferase activity (GO:0008417)	1/14	0.181507	0.435319	0.17413	0.399885	-2.12851	3.63222	FUT7
DNA N-glycosylase activity (GO:0019104)	1/11	0.145603	0.435319	0.1419	0.399885	-1.8779	3.61847	NEIL3
ATP binding (GO:0005524)	7/256	0.0735003	0.40022	0.0498454	0.302254	-1.38447	3.61412	TPX2;PIF1;DYRK3;MLKL;KIF14;MAP3K20;HSPA1A
oxidoreductase activity, acting on NAD(P)H, heme protein as acceptor (GO:0016653)	1/14	0.181507	0.435319	0.17413	0.399885	-2.09716	3.57872	NQO1
single-stranded DNA-dependent ATPase activity (GO:0043142)	1/13	0.169709	0.435319	0.163522	0.399885	-1.97364	3.50058	PIF1
aldehyde dehydrogenase (NAD) activity (GO:0004029)	1/15	0.193138	0.435319	0.184604	0.399885	-2.11855	3.48364	ALDH1A3
phosphate ion transmembrane transporter activity (GO:0015114)	1/14	0.181507	0.435319	0.17413	0.399885	-2.04037	3.48181	SLC17A7
DNA replication origin binding (GO:0003688)	1/13	0.169709	0.435319	0.163522	0.399885	-1.93415	3.43055	MCM10
PDZ domain binding (GO:0030165)	3/63	0.0603855	0.358539	0.0510993	0.303402	-1.21595	3.41319	ARHGEF16;KIF14;CIT
water transmembrane transporter activity (GO:0005372)	1/14	0.181507	0.435319	0.17413	0.399885	-1.9952	3.40473	AQP4
sugar:proton symporter activity (GO:0005351)	1/11	0.145603	0.435319	0.1419	0.399885	-1.76563	3.40215	SLC2A6
transmembrane receptor protein serine/threonine kinase activity (GO:0004675)	1/15	0.193138	0.435319	0.184604	0.399885	-2.06548	3.39637	SOSTDC1
nucleoside-triphosphatase activity (GO:0017111)	11/425	0.0411242	0.308431	0.0226794	0.190107	-1.05297	3.36018	CENPE;KIF18B;RAB26;KIF14;KIF2C;KIF23;RHOV;KIF11;RHOC;KIF15;HSPA1A
protein serine/threonine/tyrosine kinase activity (GO:0004712)	1/15	0.193138	0.435319	0.184604	0.399885	-2.03581	3.34758	AURKB
cation transmembrane transporter activity (GO:0008324)	4/98	0.0510572	0.337101	0.0404807	0.268302	-1.10616	3.2906	CACNA1I;SLC36A3;SLC1A4;CACNA1G
water channel activity (GO:0015250)	1/14	0.181507	0.435319	0.17413	0.399885	-1.92486	3.28469	AQP4
cysteine-type endopeptidase inhibitor activity (GO:0004869)	2/52	0.168459	0.435319	0.149277	0.399885	-1.83822	3.27398	BIRC5;CST6
protein kinase C binding (GO:0005080)	2/41	0.114947	0.414681	0.102826	0.391137	-1.50539	3.2566	TOP2A;ADCY4
acidic amino acid transmembrane transporter activity (GO:0015172)	1/14	0.181507	0.435319	0.17413	0.399885	-1.89157	3.22789	SLC17A7
1-phosphatidylinositol binding (GO:0005545)	1/15	0.193138	0.435319	0.184604	0.399885	-1.9316	3.17623	SCIN
cAMP binding (GO:0030552)	1/13	0.169709	0.435319	0.163522	0.399885	-1.77999	3.15711	POPDC2
transferase activity, transferring amino-acyl groups (GO:0016755)	1/17	0.215908	0.443216	0.205157	0.414483	-2.05886	3.15603	CHAC1
L-glutamate transmembrane transporter activity (GO:0005313)	1/15	0.193138	0.435319	0.184604	0.399885	-1.90318	3.1295	SLC17A7
oxidoreductase activity, acting on NAD(P)H, quinone or similar compound as acceptor (GO:0016655)	1/16	0.204604	0.441758	0.194946	0.405544	-1.94732	3.08978	NQO1
muscle alpha-actinin binding (GO:0051371)	1/17	0.215908	0.443216	0.205157	0.414483	-1.97289	3.02425	OBSL1
kinase activity (GO:0016301)	7/281	0.10668	0.40022	0.0734889	0.380806	-1.32344	2.96175	DYRK3;LTK;CDK1;BUB1B;NEK2;MASTL;BUB1
lipoprotein particle receptor activity (GO:0030228)	1/16	0.204604	0.441758	0.194946	0.405544	-1.8248	2.89538	STAB1
tropomyosin binding (GO:0005523)	1/15	0.193138	0.435319	0.184604	0.399885	-1.73494	2.85285	S100A6
magnesium ion binding (GO:0000287)	4/128	0.109548	0.400271	0.0866681	0.391137	-1.28745	2.84705	TOP2A;PIF1;DYRK3;MAP3K20
hydrolase activity, hydrolyzing N-glycosyl compounds (GO:0016799)	1/15	0.193138	0.435319	0.184604	0.399885	-1.71346	2.81753	NEIL3
growth factor receptor binding (GO:0070851)	3/93	0.14614	0.435319	0.122154	0.399885	-1.45304	2.79448	IL10;ESM1;AREG
ligand-dependent nuclear receptor binding (GO:0016922)	1/18	0.227051	0.443216	0.21524	0.414483	-1.87576	2.78097	PROX1
monovalent inorganic cation transmembrane transporter activity (GO:0015077)	1/18	0.227051	0.443216	0.21524	0.414483	-1.85906	2.75621	SLC36A3
aspartic-type peptidase activity (GO:0070001)	1/18	0.227051	0.443216	0.21524	0.414483	-1.85354	2.74802	BACE2
protein disulfide oxidoreductase activity (GO:0015035)	1/16	0.204604	0.441758	0.194946	0.405544	-1.70192	2.70041	STAB1
Notch binding (GO:0005112)	1/18	0.227051	0.443216	0.21524	0.414483	-1.79607	2.66281	CHAC1
low-density lipoprotein particle binding (GO:0030169)	1/18	0.227051	0.443216	0.21524	0.414483	-1.74759	2.59094	STAB1
calcium channel activity (GO:0005262)	3/94	0.149474	0.435319	0.124948	0.399885	-1.35594	2.57714	CACNA1I;CACNB4;CACNA1G
FAD binding (GO:0071949)	1/20	0.248867	0.463576	0.235027	0.432146	-1.84601	2.56749	AOC1
low-density lipoprotein receptor activity (GO:0005041)	1/14	0.181507	0.435319	0.17413	0.399885	-1.49403	2.5495	STAB1
DNA-(apurinic or apyrimidinic site) lyase activity (GO:0003906)	1/13	0.169709	0.435319	0.163522	0.399885	-1.43143	2.53887	NEIL3
glucose transmembrane transporter activity (GO:0005355)	1/21	0.259544	0.466483	0.244733	0.43663	-1.8317	2.47066	SLC2A6
DNA binding, bending (GO:0008301)	1/18	0.227051	0.443216	0.21524	0.414483	-1.62169	2.40429	TOP2A
cadherin binding involved in cell-cell adhesion (GO:0098641)	1/20	0.248867	0.463576	0.235027	0.432146	-1.72041	2.39281	KRT18
K63-linked polyubiquitin modification-dependent protein binding (GO:0070530)	1/21	0.259544	0.466483	0.244733	0.43663	-1.76897	2.38603	OPTN
immunoglobulin binding (GO:0019865)	1/12	0.157742	0.435319	0.152779	0.399885	-1.28761	2.37795	LGALS3
hyaluronic acid binding (GO:0005540)	1/19	0.238037	0.455305	0.225196	0.425039	-1.62876	2.3378	HMMR
Ran GTPase binding (GO:0008536)	1/19	0.238037	0.455305	0.225196	0.425039	-1.52647	2.19099	BIRC5
amino acid transmembrane transporter activity (GO:0015171)	2/57	0.193984	0.435319	0.171578	0.399885	-1.33591	2.19087	SLC36A3;SLC1A4
protein binding involved in cell-cell adhesion (GO:0098632)	1/22	0.270069	0.466483	0.254318	0.43663	-1.64401	2.15213	KRT18
ubiquitin conjugating enzyme activity (GO:0061631)	1/21	0.259544	0.466483	0.244733	0.43663	-1.5848	2.13762	UBE2C
aspartic-type endopeptidase activity (GO:0004190)	1/22	0.270069	0.466483	0.254318	0.43663	-1.62239	2.12383	BACE2
dynein complex binding (GO:0070840)	1/20	0.248867	0.463576	0.235027	0.432146	-1.50838	2.09791	CENPF
disordered domain specific binding (GO:0097718)	1/24	0.290675	0.484459	0.273125	0.445989	-1.64635	2.03414	HSPA1A
phosphatidylinositol-3,5-bisphosphate binding (GO:0080025)	1/22	0.270069	0.466483	0.254318	0.43663	-1.54828	2.02682	SH3PXD2B
protein phosphatase 2A binding (GO:0051721)	1/21	0.259544	0.466483	0.244733	0.43663	-1.493	2.01381	MASTL
cyclic nucleotide binding (GO:0030551)	1/22	0.270069	0.466483	0.254318	0.43663	-1.50106	1.965	POPDC2
voltage-gated cation channel activity (GO:0022843)	3/101	0.173464	0.435319	0.145128	0.399885	-1.12005	1.96208	CACNA1I;CACNB4;CACNA1G
serine-type endopeptidase activity (GO:0004252)	5/197	0.149634	0.435319	0.113732	0.399885	-1.0193	1.93622	PCSK1;IGKC;GZMA;GZMB;ADAM8
lipoprotein particle binding (GO:0071813)	1/24	0.290675	0.484459	0.273125	0.445989	-1.55014	1.91527	STAB1
scavenger receptor activity (GO:0005044)	1/22	0.270069	0.466483	0.254318	0.43663	-1.432	1.8746	STAB1
ubiquitin-like protein conjugating enzyme activity (GO:0061650)	1/22	0.270069	0.466483	0.254318	0.43663	-1.41603	1.85369	UBE2C
core promoter binding (GO:0001047)	3/98	0.163049	0.435319	0.13635	0.399885	-1.00752	1.82734	PROX1;E2F7;E2F8
ATPase activator activity (GO:0001671)	1/24	0.290675	0.484459	0.273125	0.445989	-1.45133	1.79319	NCAPH
RNA polymerase II carboxy-terminal domain kinase activity (GO:0008353)	1/16	0.204604	0.441758	0.194946	0.405544	-1.11352	1.7668	CDK1
N-acetyltransferase activity (GO:0008080)	1/23	0.280446	0.475756	0.263781	0.442221	-1.37027	1.74212	ESCO2
phosphotransferase activity, alcohol group as acceptor (GO:0016773)	6/255	0.156163	0.435319	0.114167	0.399885	-0.927219	1.72171	DYRK3;LTK;CDK1;BUB1B;NEK2;BUB1
oxidoreductase activity, acting on the aldehyde or oxo group of donors, NAD or NADP as acceptor (GO:0016620)	1/26	0.310701	0.491944	0.291462	0.45641	-1.46758	1.71549	ALDH1A3
acetyltransferase activity (GO:0016407)	1/25	0.30076	0.489809	0.282352	0.449554	-1.39818	1.67983	ESCO2
GTP binding (GO:0005525)	4/148	0.159793	0.435319	0.127198	0.399885	-0.900534	1.65147	TPX2;RAB26;RHOV;RHOC
SH2 domain binding (GO:0042169)	1/27	0.320502	0.499143	0.300457	0.460377	-1.42727	1.62404	SH3PXD2B
phosphatidylinositol-4-phosphate binding (GO:0070273)	1/23	0.280446	0.475756	0.263781	0.442221	-1.27554	1.62169	SH3PXD2B
kinase inhibitor activity (GO:0019210)	2/60	0.209526	0.443216	0.18521	0.399885	-1.00865	1.57642	CDKN1A;MAPK8IP1
substrate-specific channel activity (GO:0022838)	1/28	0.330164	0.505897	0.309339	0.466463	-1.39623	1.54725	AQP4
serine-type peptidase activity (GO:0008236)	5/221	0.206522	0.442546	0.159198	0.399885	-0.970159	1.53028	PCSK1;IGKC;GZMA;GZMB;ADAM8
protein tyrosine phosphatase activity (GO:0004725)	2/63	0.225189	0.443216	0.198991	0.408003	-1.01672	1.51574	CDC25C;CDKN3
carboxy-lyase activity (GO:0016831)	1/27	0.320502	0.499143	0.300457	0.460377	-1.31619	1.49764	GAD1
guanyl ribonucleotide binding (GO:0032561)	4/171	0.225789	0.443216	0.181705	0.399885	-1.00068	1.48916	TPX2;RAB26;RHOV;RHOC
alpha-actinin binding (GO:0051393)	1/30	0.349079	0.520877	0.326767	0.480045	-1.41152	1.48556	OBSL1
DNA secondary structure binding (GO:0000217)	1/25	0.30076	0.489809	0.282352	0.449554	-1.22891	1.47647	NEIL3
carboxylic acid transmembrane transporter activity (GO:0046943)	2/65	0.235679	0.455305	0.208246	0.414483	-1.01982	1.47392	SLC36A3;SLC1A4
NF-kappaB binding (GO:0051059)	1/25	0.30076	0.489809	0.282352	0.449554	-1.21373	1.45823	CDKN2A
ubiquitin binding (GO:0043130)	2/63	0.225189	0.443216	0.198991	0.408003	-0.964818	1.43837	TOP2A;CKS1B
N-acyltransferase activity (GO:0016410)	1/26	0.310701	0.491944	0.291462	0.45641	-1.22409	1.43087	ESCO2
disulfide oxidoreductase activity (GO:0015036)	1/25	0.30076	0.489809	0.282352	0.449554	-1.16063	1.39443	STAB1
epidermal growth factor receptor binding (GO:0005154)	1/26	0.310701	0.491944	0.291462	0.45641	-1.17708	1.37591	AREG
purine ribonucleoside binding (GO:0032550)	4/160	0.193323	0.435319	0.154708	0.399885	-0.832313	1.36782	TPX2;RAB26;RHOV;RHOC
transcription factor activity, RNA polymerase II core promoter proximal region sequence-specific binding (GO:0000982)	6/281	0.211067	0.443216	0.157101	0.399885	-0.860392	1.33841	BCL11A;TSHZ2;SNAI2;PROX1;GLIS2;E2F8
metal ion binding (GO:0046872)	9/443	0.180595	0.435319	0.120085	0.399885	-0.769432	1.31688	TOP2A;PIF1;DYRK3;AOC1;SCIN;S100A6;MAP3K20;ADAM8;EFCAB11
DNA-dependent ATPase activity (GO:0008094)	2/73	0.277808	0.475756	0.245633	0.43663	-0.996359	1.27616	TOP2A;BRIP1
WW domain binding (GO:0050699)	1/30	0.349079	0.520877	0.326767	0.480045	-1.18892	1.25129	CDC25C
growth factor activity (GO:0008083)	2/70	0.261998	0.466483	0.231562	0.432146	-0.900083	1.20559	IL10;AREG
protein kinase inhibitor activity (GO:0004860)	2/68	0.25146	0.465365	0.22221	0.425033	-0.867431	1.19746	CDKN1A;MAPK8IP1
phosphatidylinositol-3-phosphate binding (GO:0032266)	1/32	0.367462	0.539828	0.343759	0.495035	-1.17403	1.17536	SH3PXD2B
dicarboxylic acid transmembrane transporter activity (GO:0005310)	1/29	0.339689	0.517708	0.318108	0.472192	-1.02187	1.10334	SLC17A7
estrogen receptor binding (GO:0030331)	1/33	0.376458	0.547401	0.352095	0.499239	-1.12282	1.09694	PADI2
telomeric DNA binding (GO:0042162)	1/33	0.376458	0.547401	0.352095	0.499239	-1.10188	1.07648	PIF1
carboxylic acid binding (GO:0031406)	1/35	0.39407	0.558757	0.368452	0.519845	-1.10076	1.02506	HMMR
RNA polymerase II transcription corepressor activity (GO:0001106)	1/27	0.320502	0.499143	0.300457	0.460377	-0.895685	1.01917	HSPA1A
endopeptidase activity (GO:0004175)	7/355	0.241519	0.458886	0.175793	0.399885	-0.705928	1.00299	PCSK1;BACE2;ESPL1;IGKC;GZMA;GZMB;ADAM8
MAP kinase kinase kinase activity (GO:0004709)	2/79	0.309336	0.491944	0.273853	0.445989	-0.848215	0.995232	LTK;MAP3K20
neuropeptide receptor activity (GO:0008188)	1/36	0.40269	0.568151	0.376476	0.523393	-1.08951	0.991007	CYSLTR1
single-stranded DNA binding (GO:0003697)	2/88	0.356045	0.525765	0.316063	0.471613	-0.958247	0.989581	NEIL3;MCM10
frizzled binding (GO:0005109)	1/38	0.419563	0.582925	0.392221	0.54242	-1.11795	0.970981	WNT10B
copper ion binding (GO:0005507)	1/42	0.451899	0.610385	0.422537	0.563716	-1.16376	0.924371	AOC1
phosphatidylinositol bisphosphate binding (GO:1902936)	2/88	0.356045	0.525765	0.316063	0.471613	-0.844288	0.871895	SCIN;SH3PXD2B
receptor tyrosine kinase binding (GO:0030971)	1/40	0.435962	0.597352	0.407572	0.553133	-1.02635	0.852073	ARHGEF16
histone deacetylase binding (GO:0042826)	2/86	0.345749	0.520877	0.306716	0.464969	-0.791468	0.840571	TOP2A;HSPA1A
phosphoprotein phosphatase activity (GO:0004721)	3/137	0.308372	0.491944	0.261433	0.442221	-0.711808	0.837405	CDC25C;DUSP9;CDKN3
NADH dehydrogenase (quinone) activity (GO:0050136)	1/44	0.467387	0.61385	0.437127	0.563716	-1.05532	0.802669	WDR93
NADH dehydrogenase (ubiquinone) activity (GO:0008137)	1/44	0.467387	0.61385	0.437127	0.563716	-1.0335	0.786076	WDR93
DNA helicase activity (GO:0003678)	1/41	0.443988	0.602555	0.415102	0.560683	-0.936689	0.760553	BRIP1
ATPase activity, coupled (GO:0042623)	2/95	0.391588	0.558013	0.348529	0.499149	-0.802154	0.752055	TOP2A;HSPA1A
protein phosphatase binding (GO:0019903)	2/93	0.381517	0.549154	0.339299	0.493368	-0.770834	0.742775	NEK2;MASTL
anion:cation symporter activity (GO:0015296)	1/44	0.467387	0.61385	0.437127	0.563716	-0.975986	0.742332	SLC6A13
double-stranded DNA binding (GO:0003690)	2/100	0.416434	0.582501	0.371409	0.521436	-0.807435	0.707336	NEIL3;MCM10
hydrogen ion transmembrane transporter activity (GO:0015078)	1/52	0.525099	0.653508	0.491915	0.609546	-1.05637	0.680479	SLC36A3
CCR chemokine receptor binding (GO:0048020)	1/39	0.427821	0.589029	0.399945	0.548002	-0.8005	0.679664	CCR2
cation channel activity (GO:0005261)	3/147	0.347203	0.520877	0.295867	0.460377	-0.631033	0.667536	CACNA1I;CACNB4;CACNA1G
1-phosphatidylinositol-3-kinase activity (GO:0016303)	1/44	0.467387	0.61385	0.437127	0.563716	-0.868268	0.660402	FGF16
transcriptional repressor activity, RNA polymerase II transcription factor binding (GO:0001191)	1/48	0.497068	0.635266	0.465217	0.589275	-0.925612	0.64703	HSPA1A
transcription corepressor activity (GO:0003714)	4/204	0.329353	0.505897	0.270248	0.445989	-0.566015	0.62863	PROX1;E2F7;E2F8;HSPA1A
protein phosphatase regulator activity (GO:0019888)	1/48	0.497068	0.635266	0.465217	0.589275	-0.880073	0.615197	PPP4R4
flavin adenine dinucleotide binding (GO:0050660)	1/49	0.504226	0.637785	0.472019	0.592624	-0.894935	0.612789	AOC1
phosphatidylinositol binding (GO:0035091)	2/101	0.421342	0.582925	0.375948	0.523393	-0.708788	0.612613	SCIN;SH3PXD2B
amyloid-beta binding (GO:0001540)	1/50	0.511284	0.64192	0.478736	0.59842	-0.906387	0.608032	BACE2
protein kinase regulator activity (GO:0019887)	2/108	0.455088	0.611793	0.40733	0.553133	-0.713582	0.561778	CDKN1A;MAPK8IP1
ion channel activity (GO:0005216)	2/94	0.386562	0.553619	0.343919	0.495035	-0.582153	0.553315	CACNA1I;CACNA1G
protein kinase activator activity (GO:0030295)	1/56	0.551574	0.674672	0.517288	0.627349	-0.847277	0.504112	CDKN1A
protein tyrosine kinase binding (GO:1990782)	1/49	0.504226	0.637785	0.472019	0.592624	-0.724466	0.496064	ARHGEF16
methylation-dependent protein binding (GO:0140034)	1/53	0.53186	0.659044	0.49838	0.614435	-0.772893	0.487985	NCAPG2
protein heterodimerization activity (GO:0046982)	5/266	0.3271	0.505897	0.25988	0.442221	-0.432296	0.483086	TOP2A;ARNT2;ITGAM;MID2;KLRG1
polyubiquitin modification-dependent protein binding (GO:0031593)	1/44	0.467387	0.61385	0.437127	0.563716	-0.616743	0.469093	OPTN
phosphatase activity (GO:0016791)	2/105	0.44076	0.601037	0.393968	0.54242	-0.555013	0.454696	CDC25C;DUSP9
sequence-specific double-stranded DNA binding (GO:1990837)	2/113	0.478492	0.622694	0.429279	0.563716	-0.576401	0.424875	MCM10;KIF2C
endopeptidase inhibitor activity (GO:0004866)	2/112	0.47386	0.619495	0.424922	0.563716	-0.558242	0.41692	BIRC5;CST6
calcium ion binding (GO:0005509)	5/285	0.38045	0.549154	0.306339	0.464969	-0.423401	0.409175	AOC1;SCIN;S100A6;ADAM8;EFCAB11
ubiquitin-like protein ligase binding (GO:0044389)	5/298	0.416948	0.582501	0.338829	0.493368	-0.436738	0.382055	CDKN1A;CCNB1;UBE2C;AICDA;HSPA1A
Rho guanyl-nucleotide exchange factor activity (GO:0005089)	1/60	0.576577	0.69572	0.541402	0.647742	-0.650015	0.357928	ARHGEF16
chloride transmembrane transporter activity (GO:0015108)	1/57	0.557959	0.679566	0.523432	0.632111	-0.607042	0.354191	SLC1A4
anion channel activity (GO:0005253)	1/67	0.617036	0.707529	0.580758	0.659427	-0.732016	0.353437	SLC1A4
transmembrane receptor protein kinase activity (GO:0019199)	1/63	0.594414	0.700033	0.558699	0.649916	-0.664845	0.345839	LTK
protease binding (GO:0002020)	2/119	0.505752	0.637785	0.455047	0.581562	-0.504507	0.343926	CD70;CST6
phosphatidylinositol kinase activity (GO:0052742)	1/52	0.525099	0.653508	0.491915	0.609546	-0.494362	0.318452	FGF16
steroid hormone receptor binding (GO:0035258)	1/77	0.668242	0.743942	0.63123	0.702736	-0.786884	0.317196	PADI2
chloride channel activity (GO:0005254)	1/62	0.588553	0.696007	0.553007	0.647742	-0.58025	0.307584	SLC1A4
mitogen-activated protein kinase kinase binding (GO:0031434)	1/66	0.611502	0.707529	0.575348	0.655897	-0.605435	0.297776	LTK
core promoter sequence-specific DNA binding (GO:0001046)	1/74	0.653642	0.733417	0.616758	0.692031	-0.700317	0.297772	PROX1
protein serine/threonine phosphatase activity (GO:0004722)	1/62	0.588553	0.696007	0.553007	0.647742	-0.561212	0.297492	CDKN3
cysteine-type peptidase activity (GO:0008234)	1/66	0.611502	0.707529	0.575348	0.655897	-0.588672	0.289531	ESPL1
G-protein coupled peptide receptor activity (GO:0008528)	1/65	0.605887	0.707529	0.569869	0.65489	-0.574087	0.287653	CYSLTR1
phosphatidylinositol bisphosphate kinase activity (GO:0052813)	1/72	0.643554	0.724953	0.606797	0.683547	-0.642615	0.283232	FGF16
transcription factor activity, RNA polymerase II distal enhancer sequence-specific binding (GO:0003705)	1/65	0.605887	0.707529	0.569869	0.65489	-0.556802	0.278992	PROX1
G-protein coupled receptor binding (GO:0001664)	2/134	0.569733	0.690952	0.516441	0.627349	-0.453875	0.255345	WNT10B;HSPA1A
methylated histone binding (GO:0035064)	1/56	0.551574	0.674672	0.517288	0.627349	-0.426762	0.253915	NCAPG2
calcium ion transmembrane transporter activity (GO:0015085)	1/78	0.672971	0.746291	0.635932	0.705217	-0.637854	0.252623	CACNB4
protein tyrosine kinase activity (GO:0004713)	2/148	0.623865	0.708372	0.569498	0.65489	-0.535126	0.252484	FGF16;LTK
Ras GTPase binding (GO:0017016)	3/185	0.490161	0.634982	0.426795	0.563716	-0.347081	0.247475	ARHGEF16;BIRC5;OPTN
peptidase activity, acting on L-amino acid peptides (GO:0070011)	3/186	0.493737	0.635266	0.430161	0.563716	-0.335788	0.236983	ESPL1;GZMB;ADAM8
immunoglobulin receptor binding (GO:0034987)	1/82	0.691226	0.75769	0.654154	0.717053	-0.597473	0.22064	IGKC
ATP-dependent helicase activity (GO:0008026)	1/86	0.708464	0.770658	0.671469	0.730415	-0.631182	0.21754	BRIP1
phosphatidylinositol 3-kinase activity (GO:0035004)	1/77	0.668242	0.743942	0.63123	0.702736	-0.536033	0.216077	FGF16
RNA polymerase II transcription cofactor activity (GO:0001104)	1/85	0.704247	0.769005	0.667223	0.728576	-0.614438	0.215438	HSPA1A
phosphatidylinositol-4,5-bisphosphate binding (GO:0005546)	1/61	0.582608	0.696007	0.547242	0.647742	-0.395818	0.213837	SCIN
ubiquitin-protein transferase activity (GO:0004842)	6/418	0.546601	0.674378	0.450294	0.57808	-0.325268	0.196474	KBTBD6;UBE2C;BIRC5;LMO7;DTL;FBXO44
transmembrane receptor protein tyrosine kinase activity (GO:0004714)	1/62	0.588553	0.696007	0.553007	0.647742	-0.358008	0.189776	LTK
GTPase activity (GO:0003924)	3/223	0.61622	0.707529	0.548563	0.647742	-0.380679	0.184306	RAB26;RHOV;RHOC
regulatory region DNA binding (GO:0000975)	3/225	0.622245	0.708372	0.554558	0.647742	-0.384351	0.182344	BCL11A;PROX1;GLIS2
ubiquitin protein ligase binding (GO:0031625)	4/285	0.578546	0.69572	0.500172	0.614435	-0.310489	0.169911	CDKN1A;UBE2C;AICDA;HSPA1A
phosphatidylinositol-4,5-bisphosphate 3-kinase activity (GO:0046934)	1/69	0.627872	0.710093	0.591373	0.668815	-0.356099	0.165735	FGF16
metallopeptidase activity (GO:0008237)	1/103	0.771651	0.829889	0.73595	0.791494	-0.606573	0.157238	ADAM8
transcription regulatory region DNA binding (GO:0044212)	5/375	0.618157	0.707529	0.52949	0.636729	-0.294076	0.141454	BCL11A;PROX1;E2F7;GLIS2;E2F8
cysteine-type endopeptidase activity (GO:0004197)	1/82	0.691226	0.75769	0.654154	0.717053	-0.381648	0.140938	ESPL1
transferase activity, transferring hexosyl groups (GO:0016758)	1/101	0.764991	0.828982	0.72907	0.790057	-0.50019	0.133997	FUT7
phosphatase binding (GO:0019902)	1/103	0.771651	0.829889	0.73595	0.791494	-0.472447	0.122469	NEK2
phosphatidylinositol phosphate binding (GO:1901981)	1/82	0.691226	0.75769	0.654154	0.717053	-0.299666	0.110663	SH3PXD2B
Rab GTPase binding (GO:0017137)	1/131	0.847363	0.904489	0.815886	0.868904	-0.389459	0.0645046	OPTN
cytokine activity (GO:0005125)	1/156	0.893524	0.936229	0.866666	0.904762	-0.518291	0.0583506	IL10
zinc ion binding (GO:0008270)	3/303	0.807218	0.864876	0.748866	0.802356	-0.257856	0.0552227	AOC1;GDA;ADAM8
RNA polymerase II core promoter proximal region sequence-specific DNA binding (GO:0000978)	2/263	0.890257	0.936229	0.853042	0.89711	-0.258504	0.0300499	BCL11A;E2F8
cytokine receptor binding (GO:0005126)	1/138	0.861998	0.916677	0.831781	0.87894	-0.187425	0.0278331	IL10
DNA binding (GO:0003677)	9/894	0.892577	0.936229	0.817075	0.868904	-0.156157	0.0177461	TOP2A;NEIL3;BRIP1;BCL11A;SNAI2;MCM10;PROX1;KLRG1;KIF15
transition metal ion binding (GO:0046914)	3/400	0.925584	0.952316	0.889691	0.915386	-0.136636	0.0105661	AOC1;GDA;ADAM8
sequence-specific DNA binding (GO:0043565)	3/395	0.921651	0.951705	0.884639	0.913486	-0.108279	0.00883429	PIF1;BCL11A;SNAI2
ubiquitin protein ligase activity (GO:0061630)	1/193	0.937568	0.95431	0.917404	0.933787	-0.133673	0.00861741	UBE2C
core promoter proximal region sequence-specific DNA binding (GO:0000987)	2/279	0.908718	0.945199	0.875011	0.90683	-0.0636304	0.00609073	BCL11A;E2F8
G-protein coupled receptor activity (GO:0004930)	1/268	0.978908	0.988793	0.968863	0.980981	-0.271302	0.00578341	CYSLTR1
transcription regulatory region sequence-specific DNA binding (GO:0000976)	1/293	0.985324	0.988793	0.977539	0.980981	-0.264206	0.00390623	PROX1
transcriptional activator activity, RNA polymerase II transcription regulatory region sequence-specific binding (GO:0001228)	1/285	0.983517	0.988793	0.975062	0.980981	-0.11375	0.00189055	GLIS2
transcription coactivator activity (GO:0003713)	1/292	0.985109	0.988793	0.977243	0.980981	-0.0314365	0.000471629	FAM129B
RNA polymerase II regulatory region sequence-specific DNA binding (GO:0000977)	2/461	0.990114	0.990114	0.982589	0.982589	0.206276	-0.00204931	BCL11A;E2F8
ubiquitin-like protein ligase activity (GO:0061659)	1/187	0.931918	0.954079	0.910725	0.93031	0.0524259	-0.00369659	UBE2C
transcriptional activator activity, RNA polymerase II core promoter proximal region sequence-specific binding (GO:0001077)	1/176	0.920203	0.951705	0.897056	0.919644	0.0527716	-0.00438853	GLIS2
RNA binding (GO:0003723)	14/1388	0.933994	0.954079	0.862625	0.903854	0.0669776	-0.00457361	TOP2A;NQO1;CDKN2A;MKI67;AICDA;LGALS3;LGALS1;KRT18;NUSAP1;FSCN1;MAP3K20;S100A4;H1FX;HSPA1A
GTPase regulator activity (GO:0030695)	2/276	0.905493	0.945199	0.871135	0.906108	0.192971	-0.0191573	ARHGAP11A;DEPDC1B
GTPase activator activity (GO:0005096)	2/250	0.872774	0.924686	0.83268	0.87894	0.234145	-0.0318622	ARHGAP11A;DEPDC1B

## Sheet: Upreg TL1A_IL2vIso-Biol
Supplemental Table 5. GO Biological Process Analysis of upregulated genes in TL1A-Ig/IL-2 versus Isotype Control treated Treg. 285 upregulated genes (adjusted p<0.05 and fold increase >1.5) were analyzed using the Enrichr analysis tool [27,28].
Term	Overlap	P-value	Adjusted P-value	Old P-value	Old Adjusted P-value	Z-score	Combined Score	Genes
microtubule cytoskeleton organization involved in mitosis (GO:1902850)	11/45	2.5811e-11	1.9655e-08	1.00748e-10	7.67193e-08	-1.64655	40.1432	CENPE;STIL;CCNB1;ESPL1;NUF2;STMN1;NUSAP1;TTK;KIF11;AURKB;SPC25
mitotic sister chromatid segregation (GO:0000070)	15/83	6.81414e-13	1.03779e-09	1.6496e-12	2.51234e-09	-1.37085	38.4037	SPAG5;CDCA5;KIF14;CDCA8;NCAPG;KIF23;KNSTRN;NCAPH;CENPE;CCNB1;PSRC1;KIF18B;ESPL1;NUSAP1;KIF2C
mitotic nuclear division (GO:0140014)	10/75	1.04603e-07	2.65518e-05	1.25637e-07	3.18908e-05	-2.22487	35.7606	TPX2;KIF18B;SPAG5;ESPL1;UBE2C;NUSAP1;CDCA8;BIRC5;KIF11;KNSTRN
regulation of attachment of spindle microtubules to kinetochore (GO:0051988)	4/11	1.21446e-05	0.00123308	3.16856e-05	0.00219351	-3.11911	35.3041	CCNB1;SPAG5;NEK2;KNSTRN
sister chromatid segregation (GO:0000819)	7/33	3.36737e-07	5.12851e-05	6.53205e-07	9.94831e-05	-2.03656	30.3529	TOP2A;KIF18B;SPAG5;ESPL1;NUSAP1;CDCA8;KNSTRN
mitotic spindle organization (GO:0007052)	12/75	6.28198e-10	3.18915e-07	1.03496e-09	5.25414e-07	-1.3901	29.4537	TPX2;CENPE;STIL;CCNB1;NUF2;STMN1;BIRC5;TTK;KIF23;KIF11;AURKB;SPC25
mitotic metaphase plate congression (GO:0007080)	8/44	1.70451e-07	3.24496e-05	2.86907e-07	6.24228e-05	-1.8349	28.5965	CENPE;CCNB1;PSRC1;CDCA5;NUF2;KIF14;CDCA8;KIF2C
protein localization to kinetochore (GO:0034501)	4/13	2.57289e-05	0.00173984	5.41502e-05	0.00329883	-2.66533	28.1669	CDK1;BUB1B;KNL1;AURKB
regulation of chromosome segregation (GO:0051983)	7/30	1.66426e-07	3.24496e-05	3.72592e-07	6.30509e-05	-1.71392	26.7522	SPAG5;NEK2;KIF2C;MKI67;BUB1;KNSTRN;AURKB
mitotic cytokinesis (GO:0000281)	10/60	1.14747e-08	3.4952e-06	1.87986e-08	5.72606e-06	-1.40219	25.6365	ANLN;ESPL1;STMN1;RTKN2;NUSAP1;CKAP2;KIF23;RHOC;CEP55;CIT
protein localization to chromosome, centromeric region (GO:0071459)	4/16	6.33246e-05	0.00350484	0.000106972	0.0054306	-2.62353	25.3623	CDK1;BUB1B;KNL1;AURKB
negative regulation of cytokinesis (GO:0032466)	3/7	9.50627e-05	0.00453026	0.000231296	0.00978509	-2.6233	24.2943	E2F7;AURKB;E2F8
centromere complex assembly (GO:0034508)	7/37	7.73045e-07	0.000107032	1.28589e-06	0.000178038	-1.69913	23.9117	CENPE;CENPF;CENPI;MIS18BP1;CENPK;CENPM;KNL1
cytoskeleton-dependent cytokinesis (GO:0061640)	11/71	4.69567e-09	1.78788e-06	7.10045e-09	2.7035e-06	-1.24326	23.8416	ANLN;ESPL1;STMN1;RTKN2;NUSAP1;CKAP2;KIF23;RHOC;AURKB;CEP55;CIT
metaphase plate congression (GO:0051310)	8/45	2.04772e-07	3.46519e-05	3.34247e-07	6.30509e-05	-1.41631	21.813	CENPE;CENPF;CCNB1;PSRC1;CDCA5;KIF14;CDCA8;KIF2C
regulation of mitotic cell cycle phase transition (GO:1901990)	12/185	1.40408e-05	0.00125143	8.71846e-06	0.000885214	-1.89716	21.198	TPX2;CENPE;ANLN;CENPF;CCNB1;UBE2C;KIF14;CDK1;BUB1B;NEK2;KNTC1;HMMR
chromatin remodeling at centromere (GO:0031055)	5/33	9.55e-05	0.00453026	0.000115639	0.00568121	-2.25997	20.9192	CENPI;MIS18BP1;CENPK;CENPM;KNL1
centromeric sister chromatid cohesion (GO:0070601)	2/7	0.00402553	0.0848196	0.00552221	0.10646	-3.76426	20.7603	BUB1B;BUB1
cell cycle G2/M phase transition (GO:0044839)	10/128	1.47904e-05	0.00125143	1.10621e-05	0.000991035	-1.79929	20.0109	CCNA2;CCNB2;CDKN1A;CDKN2B;CCNB1;CDK1;NEK2;MASTL;CDC25C;OPTN
regulation of exit from mitosis (GO:0007096)	4/16	6.33246e-05	0.00350484	0.000106972	0.0054306	-2.06694	19.9816	ANLN;UBE2C;CDCA5;KNTC1
CENP-A containing nucleosome assembly (GO:0034080)	5/31	6.99742e-05	0.00355236	8.86686e-05	0.00500156	-2.08832	19.9798	CENPI;MIS18BP1;CENPK;CENPM;KNL1
attachment of mitotic spindle microtubules to kinetochore (GO:0051315)	3/12	0.000566829	0.019184	0.000836582	0.0271088	-2.6656	19.9266	CENPE;NUF2;KIF2C
CENP-A containing chromatin organization (GO:0061641)	5/31	6.99742e-05	0.00355236	8.86686e-05	0.00500156	-2.06421	19.7491	CENPI;MIS18BP1;CENPK;CENPM;KNL1
chromosome condensation (GO:0030261)	5/24	1.89874e-05	0.00152199	3.00322e-05	0.00217805	-1.80108	19.5809	TOP2A;CDCA5;NUSAP1;NCAPG;NCAPH
positive regulation of mitotic cell cycle phase transition (GO:1901992)	6/41	2.30281e-05	0.00171924	2.80637e-05	0.00213705	-1.79274	19.1444	CCNB1;ESPL1;UBE2C;CDCA5;CDK1;DTL
mitotic spindle checkpoint (GO:0071174)	4/18	0.00010411	0.00453026	0.000158307	0.00709122	-2.0086	18.419	CENPF;BUB1B;TTK;BUB1
kinetochore organization (GO:0051383)	3/13	0.000729159	0.0236278	0.00101999	0.0298739	-2.53882	18.3394	CENPE;CENPF;NUF2
mitotic spindle assembly checkpoint (GO:0007094)	4/18	0.00010411	0.00453026	0.000158307	0.00709122	-1.99969	18.3373	CENPF;BUB1B;TTK;BUB1
regulation of sister chromatid cohesion (GO:0007063)	3/13	0.000729159	0.0236278	0.00101999	0.0298739	-2.53816	18.3347	ESPL1;CDCA5;BUB1
mitotic chromosome condensation (GO:0007076)	4/16	6.33246e-05	0.00350484	0.000106972	0.0054306	-1.87038	18.0814	CDCA5;NUSAP1;NCAPG;NCAPH
spindle assembly checkpoint (GO:0071173)	4/18	0.00010411	0.00453026	0.000158307	0.00709122	-1.96805	18.0471	CENPF;BUB1B;TTK;BUB1
positive regulation of cell cycle G2/M phase transition (GO:1902751)	3/18	0.00197391	0.0477186	0.00231123	0.054154	-2.89571	18.0337	CCNB1;CDK1;DTL
establishment of spindle localization (GO:0051293)	3/11	0.000429625	0.015579	0.000675603	0.0239289	-2.32018	17.9874	SPAG5;ESPL1;NUSAP1
positive regulation of cellular extravasation (GO:0002693)	2/7	0.00402553	0.0848196	0.00552221	0.10646	-3.25937	17.9758	ADAM8;CCR2
negative regulation of cell division (GO:0051782)	3/12	0.000566829	0.019184	0.000836582	0.0271088	-2.38636	17.8391	E2F7;AURKB;E2F8
regulation of mitotic nuclear division (GO:0007088)	9/85	3.31558e-06	0.000420802	3.15503e-06	0.000369623	-1.38037	17.416	ANLN;NUSAP1;NEK2;KNTC1;KIF11;MKI67;CDC25C;OBSL1;HSPA1A
positive regulation of G2/M transition of mitotic cell cycle (GO:0010971)	3/17	0.00166228	0.0421942	0.00199975	0.0475877	-2.72115	17.4142	CCNB1;CDK1;DTL
histone exchange (GO:0043486)	5/37	0.000167452	0.00708415	0.000188038	0.00818236	-1.93374	16.8135	CENPI;MIS18BP1;CENPK;CENPM;KNL1
liver development (GO:0001889)	4/32	0.00104645	0.031875	0.00110866	0.0312683	-2.43419	16.7043	COBL;PROX1;E2F7;E2F8
regulation of cyclin-dependent protein serine/threonine kinase activity (GO:0000079)	8/68	5.2948e-06	0.000575999	5.53447e-06	0.000602071	-1.32619	16.1116	CDKN1A;CDKN2B;PSRC1;CDKN2A;PROX1;CDC25C;CKS1B;CDKN3
regulation of nuclear division (GO:0051783)	4/22	0.000237984	0.00978522	0.000310862	0.0115474	-1.93045	16.1063	NEK2;MKI67;CDC25C;OBSL1
establishment of chromosome localization (GO:0051303)	3/14	0.000918306	0.0285424	0.00122695	0.0333687	-2.28465	15.9765	CENPE;CENPF;KIF2C
regulation of cytokinesis (GO:0032465)	6/78	0.000848652	0.026927	0.000718799	0.0248802	-2.16272	15.2945	KIF14;KIF23;E2F7;AURKB;CIT;E2F8
regulation of mitotic metaphase/anaphase transition (GO:0030071)	3/16	0.00138339	0.037706	0.00171583	0.0428395	-2.31762	15.2574	CENPE;ESPL1;UBE2C
regulation of metaphase/anaphase transition of cell cycle (GO:1902099)	2/9	0.00677258	0.117212	0.00829602	0.143412	-2.99256	14.9475	CENPE;UBE2C
G2/M transition of mitotic cell cycle (GO:0000086)	10/127	1.38054e-05	0.00125143	1.03742e-05	0.000987491	-1.31713	14.7393	CCNA2;CCNB2;CDKN1A;CDKN2B;CCNB1;CDK1;NEK2;MASTL;CDC25C;OPTN
regulation of microtubule polymerization or depolymerization (GO:0031110)	3/19	0.00231957	0.0535259	0.00265117	0.0593784	-2.42703	14.7232	MAP1A;STMN1;SKA1
dendritic cell chemotaxis (GO:0002407)	3/17	0.00166228	0.0421942	0.00199975	0.0475877	-2.29732	14.7019	CCR1;CCR5;CCR2
actin filament network formation (GO:0051639)	2/9	0.00677258	0.117212	0.00829602	0.143412	-2.93026	14.6363	CARMIL1;COBL
mitotic cell cycle phase transition (GO:0044772)	14/222	3.75997e-06	0.000440495	2.08664e-06	0.000264829	-1.16219	14.517	CDKN1A;CDKN2B;UBE2C;CDKN2A;MCM10;MASTL;CDC25C;CCNA2;CCNB2;CCNB1;CDK1;NEK2;OPTN;CDKN3
microtubule depolymerization (GO:0007019)	3/16	0.00138339	0.037706	0.00171583	0.0428395	-2.17376	14.3103	KIF18B;STMN1;KIF2C
negative regulation of leukocyte chemotaxis (GO:0002689)	2/10	0.00838678	0.138838	0.00987201	0.15796	-2.99182	14.3042	PADI2;NBL1
kinetochore assembly (GO:0051382)	2/9	0.00677258	0.117212	0.00829602	0.143412	-2.74161	13.694	CENPE;CENPF
establishment of mitotic spindle localization (GO:0040001)	3/19	0.00231957	0.0535259	0.00265117	0.0593784	-2.22666	13.5077	ESPL1;SAPCD2;NUSAP1
positive regulation of cell cycle process (GO:0090068)	9/108	2.37058e-05	0.00171924	1.90387e-05	0.0015261	-1.24272	13.2348	CCNB1;SPAG5;KIF14;NUSAP1;KIF23;E2F7;AURKB;CIT;E2F8
regulation of mitotic cell cycle (GO:0007346)	11/166	2.62747e-05	0.00173984	1.7261e-05	0.00146048	-1.24756	13.1578	IL10;TPX2;CCNB1;PSRC1;CDK1;BIRC5;NEK2;MKI67;CDC25C;OBSL1;CKS1B
L-alanine transport (GO:0015808)	2/8	0.0053172	0.101226	0.00684494	0.122645	-2.49806	13.0819	SLC36A3;SLC1A4
negative regulation of cyclin-dependent protein serine/threonine kinase activity involved in G1/S transition of mitotic cell cycle (GO:0031658)	2/8	0.0053172	0.101226	0.00684494	0.122645	-2.48715	13.0247	CDKN2B;CDKN2A
AV node cell action potential (GO:0086016)	2/8	0.0053172	0.101226	0.00684494	0.122645	-2.4627	12.8967	SCN4B;CACNA1G
positive regulation of bone resorption (GO:0045780)	2/11	0.010155	0.15313	0.0115695	0.165128	-2.77669	12.7444	SPP1;ADAM8
regulation of cell cycle (GO:0051726)	12/216	6.44357e-05	0.00350484	3.7441e-05	0.00247925	-1.29208	12.4683	CCNB2;CENPF;CCNB1;CDK1;PCLAF;BIRC5;PROX1;MASTL;CDC25C;DTL;PRR11;CKS1B
response to vitamin (GO:0033273)	2/10	0.00838678	0.138838	0.00987201	0.15796	-2.58663	12.3669	KYNU;SPP1
regulation of cell cycle process (GO:0010564)	7/91	0.000316485	0.0117563	0.000259793	0.0102246	-1.51995	12.2482	SPAG5;NEK2;MKI67;CDC25C;OBSL1;KNSTRN;AURKB
negative regulation of phosphate metabolic process (GO:0045936)	3/20	0.00270046	0.0604824	0.00302038	0.0647894	-2.06179	12.1941	CDKN1A;CDKN2B;CDKN2A
DNA replication-independent nucleosome assembly (GO:0006336)	5/40	0.000244149	0.00978522	0.000261826	0.0102246	-1.43935	11.9722	CENPI;MIS18BP1;CENPK;CENPM;KNL1
regulation of single stranded viral RNA replication via double stranded DNA intermediate (GO:0045091)	2/11	0.010155	0.15313	0.0115695	0.165128	-2.60594	11.9607	TOP2A;AICDA
ectoderm development (GO:0007398)	2/11	0.010155	0.15313	0.0115695	0.165128	-2.58901	11.883	ITGAM;VAX2
positive regulation of cell division (GO:0051781)	4/42	0.00291502	0.0643418	0.00278113	0.0613864	-2.00236	11.6895	KIF14;KIF23;AURKB;CIT
proline transport (GO:0015824)	2/10	0.00838678	0.138838	0.00987201	0.15796	-2.41217	11.5328	SLC36A3;SLC1A4
positive regulation of bone remodeling (GO:0046852)	2/11	0.010155	0.15313	0.0115695	0.165128	-2.50808	11.5116	SPP1;ADAM8
Golgi to plasma membrane protein transport (GO:0043001)	3/25	0.00517078	0.101226	0.00533164	0.105456	-2.18579	11.5076	KRT18;RAB26;OPTN
positive regulation of skeletal muscle tissue development (GO:0048643)	2/13	0.0141351	0.190512	0.0153157	0.197676	-2.69896	11.4951	ACTN3;FAM129B
hepatocyte growth factor receptor signaling pathway (GO:0048012)	2/12	0.0120727	0.175111	0.0133851	0.179357	-2.57851	11.3888	STMN1;MUC20
actin filament organization (GO:0007015)	9/121	5.83256e-05	0.00350484	4.40221e-05	0.00279357	-1.15917	11.3013	CARMIL1;SCIN;COBL;PROX1;RHOV;RHOC;OBSL1;ERMN;SHROOM4
regulation of B cell apoptotic process (GO:0002902)	2/11	0.010155	0.15313	0.0115695	0.165128	-2.45672	11.2758	IL10;AURKB
regulation of DNA endoreduplication (GO:0032875)	2/8	0.0053172	0.101226	0.00684494	0.122645	-2.14863	11.252	E2F7;E2F8
regulation of monocyte chemotaxis (GO:0090025)	3/23	0.00406555	0.0848196	0.00431135	0.0899478	-2.04324	11.2485	CCR1;NBL1;CCR2
regulation of G2/M transition of mitotic cell cycle (GO:0010389)	8/150	0.00138643	0.037706	0.000970986	0.0296976	-1.69819	11.1758	TPX2;CENPF;CCNB1;KIF14;CDK1;NEK2;HMMR;DTL
positive regulation of cell cycle arrest (GO:0071158)	6/83	0.00117576	0.0344361	0.000974971	0.0296976	-1.65079	11.136	CDKN1A;CCNB1;CDK1;CDC25C;E2F7;E2F8
positive regulation of DNA-dependent DNA replication (GO:2000105)	2/13	0.0141351	0.190512	0.0153157	0.197676	-2.60128	11.0791	E2F7;E2F8
mitotic spindle assembly (GO:0090307)	5/47	0.000524923	0.018592	0.000518162	0.0187895	-1.46224	11.0432	TPX2;BIRC5;KIF23;KIF11;AURKB
positive regulation of mononuclear cell migration (GO:0071677)	3/20	0.00270046	0.0604824	0.00302038	0.0647894	-1.85521	10.9723	CCR1;LGALS3;CCR2
alanine transport (GO:0032328)	2/10	0.00838678	0.138838	0.00987201	0.15796	-2.26644	10.8361	SLC36A3;SLC1A4
regulation of cyclin-dependent protein kinase activity (GO:1904029)	4/36	0.00163962	0.0421942	0.00165303	0.0426707	-1.67963	10.772	CDKN1A;CDKN2B;CDC25C;CDKN3
microtubule polymerization or depolymerization (GO:0031109)	3/24	0.00459805	0.093371	0.00480511	0.0975757	-1.96122	10.5555	KIF18B;STMN1;KIF2C
positive regulation of cytokinesis (GO:0032467)	4/35	0.00147372	0.0393767	0.00150258	0.0394556	-1.58025	10.3032	KIF14;KIF23;AURKB;CIT
mitotic spindle elongation (GO:0000022)	2/12	0.0120727	0.175111	0.0133851	0.179357	-2.33166	10.2985	KIF23;AURKB
DNA damage response, signal transduction by p53 class mediator resulting in cell cycle arrest (GO:0006977)	6/63	0.000268019	0.0104665	0.000248279	0.0102197	-1.25091	10.2881	CDKN1A;CCNB1;CDK1;CDC25C;E2F7;E2F8
signal transduction involved in mitotic G1 DNA damage checkpoint (GO:0072431)	6/64	0.000292266	0.011128	0.000268705	0.0102309	-1.25476	10.211	CDKN1A;CCNB1;CDK1;CDC25C;E2F7;E2F8
regulation of mitotic centrosome separation (GO:0046602)	2/12	0.0120727	0.175111	0.0133851	0.179357	-2.30788	10.1934	NEK2;KIF11
regulation of response to stress (GO:0080134)	2/11	0.010155	0.15313	0.0115695	0.165128	-2.1799	10.0053	IL10;DYRK3
positive regulation of cyclin-dependent protein kinase activity (GO:1904031)	3/27	0.00644014	0.115392	0.0064853	0.12194	-1.90306	9.60133	PSRC1;PROX1;CKS1B
DNA replication (GO:0006260)	7/121	0.00172318	0.043023	0.00128833	0.0344232	-1.49085	9.48716	PIF1;BRIP1;CDK1;PCLAF;MCM10;CLSPN;CDC25C
protein sumoylation (GO:0016925)	5/69	0.00298618	0.0649707	0.00256194	0.0591188	-1.61722	9.40215	TOP2A;BCL11A;CDCA8;BIRC5;AURKB
positive regulation of cyclin-dependent protein serine/threonine kinase activity (GO:0045737)	3/31	0.00949336	0.15313	0.00920875	0.15412	-2.01274	9.37365	PSRC1;PROX1;CKS1B
DNA damage response, signal transduction by p53 class mediator (GO:0030330)	6/83	0.00117576	0.0344361	0.000974971	0.0296976	-1.38316	9.33057	CDKN1A;CCNB1;CDK1;CDC25C;E2F7;E2F8
regulation of mitotic sister chromatid separation (GO:0010965)	2/16	0.0211472	0.247748	0.021765	0.236852	-2.36216	9.10906	CENPE;UBE2C
embryonic axis specification (GO:0000578)	2/16	0.0211472	0.247748	0.021765	0.236852	-2.32878	8.98035	STIL;COBL
regulation of glial cell differentiation (GO:0045685)	1/7	0.0952781	0.436606	0.0978825	0.418203	-3.78039	8.88753	CDK1
negative regulation of cell proliferation (GO:0008285)	12/364	0.00608017	0.110239	0.00332068	0.0702416	-1.73744	8.86568	IL10;COL18A1;CDKN1A;CDKN2B;SCIN;CDKN2A;IGFBP7;PROX1;E2F7;FAM129B;CDKN3;HSPA1A
retrograde transport, vesicle recycling within Golgi (GO:0000301)	1/7	0.0952781	0.436606	0.0978825	0.418203	-3.74412	8.80227	OPTN
mitotic spindle midzone assembly (GO:0051256)	2/11	0.010155	0.15313	0.0115695	0.165128	-1.91721	8.79959	KIF23;AURKB
positive regulation of calcium ion-dependent exocytosis (GO:0045956)	2/15	0.0186767	0.229392	0.0195087	0.227954	-2.2102	8.79764	CACNA1I;CACNA1G
regulation of neural precursor cell proliferation (GO:2000177)	2/15	0.0186767	0.229392	0.0195087	0.227954	-2.20809	8.78924	PROX1;SHCBP1
retrograde vesicle-mediated transport, Golgi to ER (GO:0006890)	5/81	0.00593527	0.108909	0.0048994	0.0981815	-1.70315	8.73179	CENPE;KIF2C;KIF23;KIF11;KIF15
positive regulation of microglial cell activation (GO:1903980)	1/7	0.0952781	0.436606	0.0978825	0.418203	-3.68545	8.66434	ITGAM
positive regulation of telomere capping (GO:1904355)	2/18	0.0264666	0.258389	0.0265819	0.240978	-2.32982	8.46159	NEK2;AURKB
regulation of cell cycle G2/M phase transition (GO:1902749)	6/85	0.00133066	0.037706	0.0010951	0.0312683	-1.27467	8.44097	TPX2;CENPF;KIF14;CDK1;NEK2;HMMR
neural tube development (GO:0021915)	2/17	0.0237452	0.258389	0.0241237	0.237035	-2.24745	8.4063	STIL;PROX1
protein localization to microtubule organizing center (GO:1905508)	2/17	0.0237452	0.258389	0.0241237	0.237035	-2.23537	8.36112	STIL;SPAG5
positive regulation of axon guidance (GO:1902669)	1/7	0.0952781	0.436606	0.0978825	0.418203	-3.55605	8.36011	DSCAM
placenta development (GO:0001890)	2/14	0.0163379	0.212673	0.0173579	0.213195	-2.00153	8.23481	E2F7;E2F8
cortical cytoskeleton organization (GO:0030865)	3/30	0.00866425	0.141889	0.00847478	0.143412	-1.72298	8.18165	ANLN;RTKN2;RHOV
mitotic DNA integrity checkpoint (GO:0044774)	2/14	0.0163379	0.212673	0.0173579	0.213195	-1.94207	7.9902	TOP2A;CLSPN
antigen processing and presentation of exogenous peptide antigen via MHC class II (GO:0019886)	5/98	0.012967	0.182858	0.0103591	0.160989	-1.83232	7.96205	CENPE;KIF2C;KIF23;KIF11;KIF15
negative regulation of T cell activation (GO:0050868)	3/35	0.0132609	0.183604	0.0125081	0.173181	-1.84069	7.95719	IL10;LGALS3;HAVCR2
septin ring organization (GO:0031106)	2/18	0.0264666	0.258389	0.0265819	0.240978	-2.17062	7.88341	ANLN;RTKN2
negative regulation of steroid biosynthetic process (GO:0010894)	2/17	0.0237452	0.258389	0.0241237	0.237035	-2.10691	7.88063	SNAI2;PROX1
regulation of mitotic spindle checkpoint (GO:1903504)	1/7	0.0952781	0.436606	0.0978825	0.418203	-3.30776	7.77639	CCNB1
protein depolymerization (GO:0051261)	3/26	0.00578456	0.107438	0.00589153	0.11216	-1.50563	7.75785	KIF18B;STMN1;KIF2C
negative regulation of leukocyte degranulation (GO:0043301)	1/7	0.0952781	0.436606	0.0978825	0.418203	-3.29874	7.7552	CCR2
positive regulation of secretion (GO:0051047)	2/17	0.0237452	0.258389	0.0241237	0.237035	-2.07211	7.75048	SCIN;SPP1
antigen processing and presentation of exogenous peptide antigen (GO:0002478)	5/98	0.012967	0.182858	0.0103591	0.160989	-1.76639	7.67559	CENPE;KIF2C;KIF23;KIF11;KIF15
cardiac muscle cell contraction (GO:0086003)	2/18	0.0264666	0.258389	0.0265819	0.240978	-2.11052	7.66512	SCN4B;CACNA1G
activation of protein kinase activity (GO:0032147)	10/234	0.00196187	0.0477186	0.00119504	0.0330918	-1.215	7.57412	TPX2;TNFSF15;KIF14;CDK1;ADCY4;MAP3K20;CLSPN;MUC20;DUSP9;INAVA
regulation of interleukin-18 production (GO:0032661)	1/8	0.10813	0.436606	0.109427	0.418203	-3.39422	7.55019	IL10
response to heparin (GO:0071503)	1/7	0.0952781	0.436606	0.0978825	0.418203	-3.20299	7.53009	AOC1
regulation of cyclin-dependent protein serine/threonine kinase activity involved in G1/S transition of mitotic cell cycle (GO:0031657)	2/15	0.0186767	0.229392	0.0195087	0.227954	-1.87191	7.45111	CDKN2B;CDKN2A
granzyme-mediated apoptotic signaling pathway (GO:0008626)	1/7	0.0952781	0.436606	0.0978825	0.418203	-3.16517	7.44117	GZMB
antigen processing and presentation of peptide antigen via MHC class II (GO:0002495)	5/99	0.0135029	0.185269	0.0107724	0.165128	-1.72245	7.41489	CENPE;KIF2C;KIF23;KIF11;KIF15
chromatin-mediated maintenance of transcription (GO:0048096)	1/8	0.10813	0.436606	0.109427	0.418203	-3.29704	7.33401	PADI2
anaphase-promoting complex-dependent catabolic process (GO:0031145)	5/80	0.00563279	0.10591	0.00466189	0.0959466	-1.41483	7.3276	CCNB1;UBE2C;CDK1;BUB1B;AURKB
glutamine family amino acid catabolic process (GO:0009065)	2/17	0.0237452	0.258389	0.0241237	0.237035	-1.95065	7.29617	AOC1;GAD1
regulation of chemokine-mediated signaling pathway (GO:0070099)	1/7	0.0952781	0.436606	0.0978825	0.418203	-3.09937	7.28647	PADI2
regulation of bone resorption (GO:0045124)	2/23	0.0417879	0.334345	0.0402659	0.308165	-2.27187	7.21353	SPP1;ADAM8
establishment of spindle orientation (GO:0051294)	2/22	0.0385077	0.318735	0.0373526	0.300994	-2.20505	7.18161	SPAG5;SAPCD2
negative regulation of immune response (GO:0050777)	3/45	0.025931	0.258389	0.0233777	0.237035	-1.96232	7.16702	LGALS3;CCR2;HAVCR2
negative regulation of cellular process (GO:0048523)	16/535	0.00429087	0.0883108	0.00192606	0.0473128	-1.31432	7.16472	IL10;COL18A1;CDKN1A;CDKN2B;DSCAM;CDKN2A;PROX1;AICDA;WISP1;FAM129B;PSRC1;SCIN;IGFBP7;E2F7;CDKN3;HSPA1A
positive regulation of T cell differentiation in thymus (GO:0033089)	1/7	0.0952781	0.436606	0.0978825	0.418203	-3.03875	7.14397	ADAM8
membrane depolarization during cardiac muscle cell action potential (GO:0086012)	2/18	0.0264666	0.258389	0.0265819	0.240978	-1.96307	7.12963	SCN4B;CACNA1G
Golgi disassembly (GO:0090166)	1/7	0.0952781	0.436606	0.0978825	0.418203	-3.01564	7.08964	CDK1
regulation of isotype switching (GO:0045191)	1/8	0.10813	0.436606	0.109427	0.418203	-3.18146	7.07692	IL10
positive regulation of monocyte chemotaxis (GO:0090026)	2/18	0.0264666	0.258389	0.0265819	0.240978	-1.94429	7.0614	CCR1;CCR2
negative regulation of lymphocyte migration (GO:2000402)	1/7	0.0952781	0.436606	0.0978825	0.418203	-2.98565	7.01912	PADI2
ventricular cardiac muscle cell development (GO:0055015)	1/7	0.0952781	0.436606	0.0978825	0.418203	-2.98031	7.00657	PROX1
regulation of thymocyte apoptotic process (GO:0070243)	1/7	0.0952781	0.436606	0.0978825	0.418203	-2.97291	6.98919	ADAM8
regulation of response to wounding (GO:1903034)	1/7	0.0952781	0.436606	0.0978825	0.418203	-2.95455	6.94602	IL10
embryonic camera-type eye development (GO:0031076)	1/7	0.0952781	0.436606	0.0978825	0.418203	-2.95417	6.94512	ALDH1A3
regulation of protein depolymerization (GO:1901879)	1/7	0.0952781	0.436606	0.0978825	0.418203	-2.94522	6.92408	MAP1A
regulation of endothelial cell chemotaxis to fibroblast growth factor (GO:2000544)	1/8	0.10813	0.436606	0.109427	0.418203	-3.11227	6.923	FGF16
positive regulation of tumor necrosis factor-mediated signaling pathway (GO:1903265)	1/8	0.10813	0.436606	0.109427	0.418203	-3.10564	6.90827	HSPA1A
negative regulation of immune effector process (GO:0002698)	2/17	0.0237452	0.258389	0.0241237	0.237035	-1.83967	6.88106	LGALS3;HAVCR2
kynurenine metabolic process (GO:0070189)	1/9	0.120799	0.436606	0.120826	0.418203	-3.24788	6.86479	KYNU
nucleotide-binding oligomerization domain containing 2 signaling pathway (GO:0070431)	1/7	0.0952781	0.436606	0.0978825	0.418203	-2.91056	6.8426	INAVA
regulation of dopamine metabolic process (GO:0042053)	1/7	0.0952781	0.436606	0.0978825	0.418203	-2.90529	6.8302	ITGAM
positive regulation of regulated secretory pathway (GO:1903307)	2/17	0.0237452	0.258389	0.0241237	0.237035	-1.8253	6.82732	CACNA1I;CACNA1G
positive regulation of leukocyte migration (GO:0002687)	3/35	0.0132609	0.183604	0.0125081	0.173181	-1.57555	6.811	LGALS3;ADAM8;MADCAM1
hepaticobiliary system development (GO:0061008)	2/22	0.0385077	0.318735	0.0373526	0.300994	-2.08804	6.80054	COBL;PROX1
regulation of ubiquitin protein ligase activity (GO:1904666)	3/37	0.0154203	0.204219	0.0143798	0.188796	-1.62515	6.78025	CCNB1;UBE2C;CDK1
nuclear envelope disassembly (GO:0051081)	3/47	0.0290289	0.267966	0.0260079	0.240978	-1.91083	6.76332	CCNB2;CCNB1;CDK1
cardiac myofibril assembly (GO:0055003)	2/18	0.0264666	0.258389	0.0265819	0.240978	-1.84646	6.70611	PROX1;OBSL1
fucose catabolic process (GO:0019317)	1/10	0.133289	0.436606	0.132078	0.418203	-3.32522	6.70109	FUT7
lens fiber cell development (GO:0070307)	1/7	0.0952781	0.436606	0.0978825	0.418203	-2.84618	6.69124	PROX1
epithelial to mesenchymal transition involved in endocardial cushion formation (GO:0003198)	1/7	0.0952781	0.436606	0.0978825	0.418203	-2.8389	6.67413	SNAI2
positive regulation of mitophagy in response to mitochondrial depolarization (GO:0098779)	1/7	0.0952781	0.436606	0.0978825	0.418203	-2.82856	6.64982	OPTN
negative regulation of keratinocyte proliferation (GO:0010839)	1/8	0.10813	0.436606	0.109427	0.418203	-2.98889	6.64855	SNAI2
regulation of mitotic spindle organization (GO:0060236)	3/36	0.0143174	0.191276	0.0134253	0.179357	-1.56388	6.64068	TPX2;PSRC1;HSPA1A
regulation of cell proliferation (GO:0042127)	21/741	0.00217091	0.0516609	0.000755115	0.0255565	-1.08086	6.62849	IL10;COL18A1;CDKN1A;CDKN2B;CDKN2A;RTKN2;KIF14;LAMC2;TTK;PROX1;AREG;SHCBP1;FAM129B;ESM1;SCIN;SAPCD2;BIRC5;IGFBP7;E2F7;CDKN3;HSPA1A
epithelium development (GO:0060429)	5/116	0.0249928	0.258389	0.0196073	0.227954	-1.79528	6.62308	LGALS3;STIL;CDK1;SNAI2;PROX1
regulation of macrophage apoptotic process (GO:2000109)	1/7	0.0952781	0.436606	0.0978825	0.418203	-2.78205	6.54048	CDKN2A
negative regulation of coenzyme metabolic process (GO:0051198)	1/7	0.0952781	0.436606	0.0978825	0.418203	-2.77534	6.52471	ACTN3
regulation of telomerase activity (GO:0051972)	3/43	0.0230211	0.258389	0.0209	0.234341	-1.72441	6.50336	PIF1;NEK2;AURKB
negative regulation of protein dephosphorylation (GO:0035308)	2/19	0.0293074	0.267966	0.0291367	0.257996	-1.83888	6.4911	PPP4R4;MASTL
negative regulation of phosphoprotein phosphatase activity (GO:0032515)	2/18	0.0264666	0.258389	0.0265819	0.240978	-1.78493	6.48262	PPP4R4;MASTL
regulation of G1/S transition of mitotic cell cycle (GO:2000045)	3/47	0.0290289	0.267966	0.0260079	0.240978	-1.83063	6.47946	CDKN1A;KIF14;E2F7
neurotransmitter loading into synaptic vesicle (GO:0098700)	1/7	0.0952781	0.436606	0.0978825	0.418203	-2.74085	6.44363	SLC17A7
positive regulation of mitotic sister chromatid separation (GO:1901970)	1/8	0.10813	0.436606	0.109427	0.418203	-2.88994	6.42845	ESPL1
protein localization to centrosome (GO:0071539)	2/19	0.0293074	0.267966	0.0291367	0.257996	-1.79976	6.35299	STIL;SPAG5
positive regulation of lamellipodium organization (GO:1902745)	2/22	0.0385077	0.318735	0.0373526	0.300994	-1.94859	6.34637	CARMIL1;FSCN1
spindle assembly (GO:0051225)	4/81	0.0282545	0.267966	0.0235271	0.237035	-1.77756	6.33968	TPX2;BIRC5;NEK2;KIF11
histone-serine phosphorylation (GO:0035404)	1/7	0.0952781	0.436606	0.0978825	0.418203	-2.68985	6.32372	AURKB
striated muscle cell differentiation (GO:0051146)	2/20	0.0322638	0.287355	0.0317853	0.273497	-1.83763	6.31008	POPDC2;PROX1
positive regulation of ubiquitin protein ligase activity (GO:1904668)	4/83	0.0305378	0.27457	0.0253654	0.240978	-1.80766	6.30653	CCNB1;UBE2C;CDK1;BUB1B
regulation of cardiac muscle cell apoptotic process (GO:0010665)	1/7	0.0952781	0.436606	0.0978825	0.418203	-2.67873	6.29759	LTK
positive regulation of protein serine/threonine kinase activity (GO:0071902)	5/119	0.0275158	0.265231	0.0215454	0.236852	-1.74008	6.25212	PSRC1;TNFSF15;ADAM8;PROX1;CKS1B
regulation of microglial cell activation (GO:1903978)	1/8	0.10813	0.436606	0.109427	0.418203	-2.80218	6.23324	ITGAM
positive regulation of IRE1-mediated unfolded protein response (GO:1903896)	1/9	0.120799	0.436606	0.120826	0.418203	-2.93997	6.21399	HSPA1A
negative regulation of chromosome organization (GO:2001251)	1/7	0.0952781	0.436606	0.0978825	0.418203	-2.63966	6.20572	TOP2A
dorsal/ventral pattern formation (GO:0009953)	2/21	0.0353318	0.309255	0.0345248	0.290504	-1.8541	6.1982	NBL1;DSCAML1
positive regulation of mitotic nuclear division (GO:0045840)	3/41	0.0202995	0.241532	0.0185748	0.226315	-1.5886	6.19102	UBE2C;CDCA5;NUSAP1
lymphatic endothelial cell differentiation (GO:0060836)	1/8	0.10813	0.436606	0.109427	0.418203	-2.77129	6.16452	PROX1
cellular response to unfolded protein (GO:0034620)	2/23	0.0417879	0.334345	0.0402659	0.308165	-1.9412	6.16359	OPTN;HSPA1A
regulation of chondrocyte differentiation (GO:0032330)	2/24	0.0451688	0.341246	0.0432621	0.313753	-1.98673	6.15358	SCIN;SNAI2
cleavage furrow formation (GO:0036089)	1/8	0.10813	0.436606	0.109427	0.418203	-2.76115	6.14196	AURKB
regulation of spindle organization (GO:0090224)	2/19	0.0293074	0.267966	0.0291367	0.257996	-1.73468	6.12326	TPX2;PSRC1
sprouting angiogenesis (GO:0002040)	3/45	0.025931	0.258389	0.0233777	0.237035	-1.67548	6.11938	ESM1;E2F7;E2F8
organelle disassembly (GO:1903008)	2/21	0.0353318	0.309255	0.0345248	0.290504	-1.82968	6.11658	DYRK3;CDK1
DNA damage checkpoint (GO:0000077)	3/39	0.0177661	0.223618	0.0164016	0.206443	-1.51276	6.09713	BRIP1;MAP3K20;CLSPN
positive regulation of myeloid leukocyte mediated immunity (GO:0002888)	1/10	0.133289	0.436606	0.132078	0.418203	-3.00151	6.04874	ITGAM
release of sequestered calcium ion into cytosol by sarcoplasmic reticulum (GO:0014808)	1/7	0.0952781	0.436606	0.0978825	0.418203	-2.57013	6.04227	CCR5
extracellular matrix organization (GO:0030198)	8/230	0.0173175	0.223513	0.0116013	0.165128	-1.48866	6.03805	COL18A1;ITGAM;COL6A2;SH3PXD2B;SPP1;LAMC2;ADAM8;MADCAM1
response to muramyl dipeptide (GO:0032495)	1/10	0.133289	0.436606	0.132078	0.418203	-2.99072	6.02699	INAVA
positive regulation of skeletal muscle fiber development (GO:0048743)	1/7	0.0952781	0.436606	0.0978825	0.418203	-2.55056	5.99626	FAM129B
benzene-containing compound metabolic process (GO:0042537)	1/9	0.120799	0.436606	0.120826	0.418203	-2.82701	5.97525	KYNU
positive regulation of cellular senescence (GO:2000774)	1/8	0.10813	0.436606	0.109427	0.418203	-2.67519	5.95075	CDKN2A
neuronal action potential (GO:0019228)	2/24	0.0451688	0.341246	0.0432621	0.313753	-1.92063	5.94885	CACNA1I;CACNA1G
regulation of skeletal muscle fiber development (GO:0048742)	1/8	0.10813	0.436606	0.109427	0.418203	-2.67172	5.94304	FAM129B
calcium ion import (GO:0070509)	2/29	0.0634639	0.416619	0.0593986	0.380101	-2.14798	5.92259	CACNA1I;CACNA1G
positive regulation of cell aging (GO:0090343)	1/9	0.120799	0.436606	0.120826	0.418203	-2.79988	5.9179	CDKN2A
regulation of chromatin assembly or disassembly (GO:0001672)	1/8	0.10813	0.436606	0.109427	0.418203	-2.66019	5.91739	PADI2
positive regulation of metaphase/anaphase transition of cell cycle (GO:1902101)	1/8	0.10813	0.436606	0.109427	0.418203	-2.65991	5.91678	ESPL1
negative regulation of mitochondrial outer membrane permeabilization involved in apoptotic signaling pathway (GO:1901029)	1/8	0.10813	0.436606	0.109427	0.418203	-2.65826	5.9131	HSPA1A
positive regulation of tumor necrosis factor biosynthetic process (GO:0042535)	1/9	0.120799	0.436606	0.120826	0.418203	-2.79569	5.90905	CCR2
cellular response to histamine (GO:0071420)	1/8	0.10813	0.436606	0.109427	0.418203	-2.65595	5.90796	AOC1
fusion of virus membrane with host plasma membrane (GO:0019064)	1/8	0.10813	0.436606	0.109427	0.418203	-2.65405	5.90374	CCR5
negative regulation of type 2 immune response (GO:0002829)	1/8	0.10813	0.436606	0.109427	0.418203	-2.64737	5.88888	CCR2
negative regulation of glycolytic process (GO:0045820)	1/7	0.0952781	0.436606	0.0978825	0.418203	-2.50449	5.88795	ACTN3
membrane depolarization during action potential (GO:0086010)	3/39	0.0177661	0.223618	0.0164016	0.206443	-1.46064	5.88705	CACNA1I;SCN4B;CACNA1G
synaptic transmission, glutamatergic (GO:0035249)	2/22	0.0385077	0.318735	0.0373526	0.300994	-1.80607	5.88217	SLC17A7;SLC1A4
L-fucose metabolic process (GO:0042354)	1/10	0.133289	0.436606	0.132078	0.418203	-2.88792	5.81982	FUT7
regulation of interleukin-2 production (GO:0032663)	2/22	0.0385077	0.318735	0.0373526	0.300994	-1.78632	5.81785	CCR2;HAVCR2
regulation of vitamin D biosynthetic process (GO:0060556)	1/8	0.10813	0.436606	0.109427	0.418203	-2.60952	5.80469	SNAI2
neutral amino acid transport (GO:0015804)	2/26	0.0522188	0.364813	0.049493	0.341076	-1.96239	5.7936	SLC36A3;SLC1A4
smooth muscle tissue development (GO:0048745)	1/7	0.0952781	0.436606	0.0978825	0.418203	-2.45277	5.76635	PROX1
regulation of centrosome cycle (GO:0046605)	2/27	0.055881	0.381645	0.0527227	0.35373	-1.99782	5.76277	NEK2;KIF11
positive regulation of extracellular matrix disassembly (GO:0090091)	1/8	0.10813	0.436606	0.109427	0.418203	-2.58764	5.75601	FSCN1
regulation of protein localization to cell cortex (GO:1904776)	1/7	0.0952781	0.436606	0.0978825	0.418203	-2.4418	5.74057	SAPCD2
venous blood vessel development (GO:0060841)	1/8	0.10813	0.436606	0.109427	0.418203	-2.57615	5.73045	PROX1
negative regulation of cyclin-dependent protein serine/threonine kinase activity (GO:0045736)	2/25	0.0486469	0.349477	0.0463386	0.32825	-1.89395	5.72572	CDKN2B;CDKN2A
negative regulation of B cell apoptotic process (GO:0002903)	1/8	0.10813	0.436606	0.109427	0.418203	-2.57216	5.72158	AURKB
regulation of lymphocyte apoptotic process (GO:0070228)	1/7	0.0952781	0.436606	0.0978825	0.418203	-2.41966	5.68851	LGALS3
regulation of microtubule cytoskeleton organization (GO:0070507)	2/24	0.0451688	0.341246	0.0432621	0.313753	-1.83259	5.67616	STMN1;SKA1
negative regulation of ubiquitin-protein ligase activity involved in mitotic cell cycle (GO:0051436)	4/72	0.0192683	0.234765	0.0162757	0.206443	-1.42957	5.64578	CCNB1;UBE2C;CDK1;BUB1B
sequestering of extracellular ligand from receptor (GO:0035581)	1/8	0.10813	0.436606	0.109427	0.418203	-2.52832	5.62406	NBL1
negative regulation of cyclin-dependent protein kinase activity (GO:1904030)	2/22	0.0385077	0.318735	0.0373526	0.300994	-1.7267	5.62368	CDKN1A;CDKN2A
negative regulation of mononuclear cell migration (GO:0071676)	1/7	0.0952781	0.436606	0.0978825	0.418203	-2.39097	5.62106	NBL1
negative regulation of cell cycle G1/S phase transition (GO:1902807)	2/23	0.0417879	0.334345	0.0402659	0.308165	-1.76885	5.61635	CDKN1A;E2F7
L-amino acid transport (GO:0015807)	2/26	0.0522188	0.364813	0.049493	0.341076	-1.90085	5.6119	SLC36A3;SLC1A4
positive regulation of protein ubiquitination involved in ubiquitin-dependent protein catabolic process (GO:2000060)	4/88	0.0367103	0.317669	0.0303314	0.267021	-1.68387	5.56466	CCNB1;UBE2C;CDK1;BUB1B
regulation of microtubule nucleation (GO:0010968)	1/7	0.0952781	0.436606	0.0978825	0.418203	-2.36693	5.56454	HSPA1A
L-fucose catabolic process (GO:0042355)	1/10	0.133289	0.436606	0.132078	0.418203	-2.76096	5.56397	FUT7
negative regulation of single stranded viral RNA replication via double stranded DNA intermediate (GO:0045869)	1/9	0.120799	0.436606	0.120826	0.418203	-2.62464	5.54751	AICDA
heterocycle catabolic process (GO:0046700)	1/7	0.0952781	0.436606	0.0978825	0.418203	-2.35569	5.53813	AOC1
epithelial cell differentiation (GO:0030855)	5/97	0.0124456	0.178818	0.00995677	0.15796	-1.25837	5.5197	LGALS3;CDK1;PROX1;E2F7;E2F8
macropinocytosis (GO:0044351)	1/7	0.0952781	0.436606	0.0978825	0.418203	-2.34679	5.5172	CARMIL1
cytoplasmic sequestering of NF-kappaB (GO:0007253)	1/8	0.10813	0.436606	0.109427	0.418203	-2.46576	5.48491	IL10
negative regulation of cell adhesion mediated by integrin (GO:0033629)	1/8	0.10813	0.436606	0.109427	0.418203	-2.46565	5.48466	SNAI2
regulation of smooth muscle cell apoptotic process (GO:0034391)	1/9	0.120799	0.436606	0.120826	0.418203	-2.59229	5.47913	CDKN2A
tube closure (GO:0060606)	2/30	0.0673782	0.430149	0.0628401	0.39385	-2.02457	5.46113	STIL;COBL
positive regulation of microtubule polymerization (GO:0031116)	2/25	0.0486469	0.349477	0.0463386	0.32825	-1.80526	5.45761	PSRC1;HSPA1A
negative regulation of extrinsic apoptotic signaling pathway in absence of ligand (GO:2001240)	2/24	0.0451688	0.341246	0.0432621	0.313753	-1.75667	5.44103	SNAI2;HSPA1A
mitotic nuclear envelope disassembly (GO:0007077)	3/45	0.025931	0.258389	0.0233777	0.237035	-1.48915	5.43883	CCNB2;CCNB1;CDK1
regulation of membrane protein ectodomain proteolysis (GO:0051043)	2/23	0.0417879	0.334345	0.0402659	0.308165	-1.70741	5.42127	IL10;ADAM8
negative regulation of signal transduction in absence of ligand (GO:1901099)	2/24	0.0451688	0.341246	0.0432621	0.313753	-1.74814	5.41459	SNAI2;HSPA1A
negative regulation of membrane protein ectodomain proteolysis (GO:0051045)	1/8	0.10813	0.436606	0.109427	0.418203	-2.42563	5.39564	IL10
heterochromatin assembly (GO:0031507)	1/9	0.120799	0.436606	0.120826	0.418203	-2.53459	5.35717	CDKN2A
regulation of immunoglobulin mediated immune response (GO:0002889)	1/7	0.0952781	0.436606	0.0978825	0.418203	-2.27247	5.34248	IL10
regulation of sarcomere organization (GO:0060297)	1/7	0.0952781	0.436606	0.0978825	0.418203	-2.27157	5.34036	PROX1
membrane fusion involved in viral entry into host cell (GO:0039663)	1/8	0.10813	0.436606	0.109427	0.418203	-2.39695	5.33184	CCR5
positive regulation of podosome assembly (GO:0071803)	1/7	0.0952781	0.436606	0.0978825	0.418203	-2.26682	5.32919	FSCN1
membrane depolarization (GO:0051899)	3/44	0.0244526	0.258389	0.0221198	0.237035	-1.42665	5.29434	CACNA1I;CACNB4;CACNA1G
regulation of telomere capping (GO:1904353)	2/24	0.0451688	0.341246	0.0432621	0.313753	-1.70695	5.28701	NEK2;AURKB
nose development (GO:0043584)	1/9	0.120799	0.436606	0.120826	0.418203	-2.47593	5.23319	PROX1
cell cycle G1/S phase transition (GO:0044843)	5/93	0.0105025	0.156817	0.00845477	0.143412	-1.14508	5.21715	CCNA2;CDKN1A;CDKN2A;MCM10;CDKN3
regulation of MHC class II biosynthetic process (GO:0045346)	1/9	0.120799	0.436606	0.120826	0.418203	-2.46059	5.20077	IL10
lamellipodium assembly (GO:0030032)	2/24	0.0451688	0.341246	0.0432621	0.313753	-1.67517	5.18859	CARMIL1;ABLIM3
microglial cell activation (GO:0001774)	1/8	0.10813	0.436606	0.109427	0.418203	-2.33211	5.1876	ITGAM
cellular response to topologically incorrect protein (GO:0035967)	2/28	0.0596305	0.401846	0.0560254	0.368008	-1.83335	5.1693	OPTN;HSPA1A
positive regulation of transport (GO:0051050)	3/45	0.025931	0.258389	0.0233777	0.237035	-1.4141	5.16473	SCIN;SPAG5;SYNGR3
regulation of transcription involved in G1/S transition of mitotic cell cycle (GO:0000083)	2/27	0.055881	0.381645	0.0527227	0.35373	-1.78769	5.15665	RRM2;E2F7
regulation of methylation-dependent chromatin silencing (GO:0090308)	1/10	0.133289	0.436606	0.132078	0.418203	-2.55529	5.14951	AICDA
desmosome organization (GO:0002934)	1/9	0.120799	0.436606	0.120826	0.418203	-2.43403	5.14462	SNAI2
cellular defense response (GO:0006968)	3/57	0.0472906	0.349477	0.041424	0.31232	-1.67986	5.12599	CCR5;CCR3;KLRG1
positive regulation of lymphocyte apoptotic process (GO:0070230)	1/8	0.10813	0.436606	0.109427	0.418203	-2.28939	5.09258	IL10
regulation of viral entry into host cell (GO:0046596)	2/27	0.055881	0.381645	0.0527227	0.35373	-1.76051	5.07823	LGALS1;MID2
positive regulation of ubiquitin-protein ligase activity involved in regulation of mitotic cell cycle transition (GO:0051437)	4/77	0.0240026	0.258389	0.0201003	0.230629	-1.35976	5.07134	CCNB1;UBE2C;CDK1;BUB1B
cardiac muscle cell action potential (GO:0086001)	2/30	0.0673782	0.430149	0.0628401	0.39385	-1.87979	5.0706	SCN4B;CACNA1G
negative regulation of phosphorylation (GO:0042326)	4/76	0.0230045	0.258389	0.019295	0.227954	-1.33747	5.045	CDKN1A;CDKN2B;ACTN3;CDKN2A
glutamate catabolic process (GO:0006538)	1/7	0.0952781	0.436606	0.0978825	0.418203	-2.13498	5.01925	GAD1
venous blood vessel morphogenesis (GO:0048845)	1/7	0.0952781	0.436606	0.0978825	0.418203	-2.13376	5.01639	PROX1
in utero embryonic development (GO:0001701)	2/26	0.0522188	0.364813	0.049493	0.341076	-1.69835	5.01407	ARNT2;STIL
regulation of cell projection organization (GO:0031344)	1/8	0.10813	0.436606	0.109427	0.418203	-2.24918	5.00313	ERMN
positive regulation of lipid transport (GO:0032370)	1/8	0.10813	0.436606	0.109427	0.418203	-2.24697	4.99821	SPP1
negative regulation of protein maturation (GO:1903318)	1/11	0.145603	0.443507	0.143188	0.42181	-2.59298	4.99634	CHAC1
megakaryocyte differentiation (GO:0030219)	1/10	0.133289	0.436606	0.132078	0.418203	-2.47126	4.98016	CDKN2B
exocrine system development (GO:0035272)	1/9	0.120799	0.436606	0.120826	0.418203	-2.35572	4.97912	RAB26
cellular senescence (GO:0090398)	2/25	0.0486469	0.349477	0.0463386	0.32825	-1.64456	4.97179	CDKN1A;CDKN2A
negative regulation of G1/S transition of mitotic cell cycle (GO:2000134)	2/25	0.0486469	0.349477	0.0463386	0.32825	-1.64438	4.97122	CDKN1A;E2F7
positive regulation of T cell chemotaxis (GO:0010820)	1/10	0.133289	0.436606	0.132078	0.418203	-2.46337	4.96426	CCR2
regulation of microvillus organization (GO:0032530)	1/9	0.120799	0.436606	0.120826	0.418203	-2.34579	4.95812	FSCN1
negative regulation of glycoprotein biosynthetic process (GO:0010561)	1/8	0.10813	0.436606	0.109427	0.418203	-2.22808	4.95619	BACE2
nicotinamide nucleotide biosynthetic process (GO:0019359)	1/10	0.133289	0.436606	0.132078	0.418203	-2.44278	4.92277	KYNU
primary neural tube formation (GO:0014020)	2/29	0.0634639	0.416619	0.0593986	0.380101	-1.78195	4.91333	STIL;COBL
release of sequestered calcium ion into cytosol by endoplasmic reticulum (GO:1903514)	1/8	0.10813	0.436606	0.109427	0.418203	-2.20821	4.912	CCR5
regulation of ubiquitin-protein ligase activity involved in mitotic cell cycle (GO:0051439)	4/73	0.0201643	0.241532	0.0170005	0.212228	-1.25794	4.9108	CCNB1;UBE2C;CDK1;BUB1B
regulation of chromosome organization (GO:0033044)	2/25	0.0486469	0.349477	0.0463386	0.32825	-1.62386	4.90919	PIF1;MKI67
lamellipodium organization (GO:0097581)	2/26	0.0522188	0.364813	0.049493	0.341076	-1.66136	4.90485	CARMIL1;ABLIM3
regulation of endodeoxyribonuclease activity (GO:0032071)	1/9	0.120799	0.436606	0.120826	0.418203	-2.31542	4.89394	GZMA
nucleotide biosynthetic process (GO:0009165)	2/27	0.055881	0.381645	0.0527227	0.35373	-1.69604	4.89229	RRM2;ADCY4
positive regulation of fibroblast proliferation (GO:0048146)	2/29	0.0634639	0.416619	0.0593986	0.380101	-1.77187	4.88555	CDKN1A;S100A6
negative regulation of interleukin-1 production (GO:0032692)	1/9	0.120799	0.436606	0.120826	0.418203	-2.31039	4.8833	IL10
cell junction maintenance (GO:0034331)	1/9	0.120799	0.436606	0.120826	0.418203	-2.30624	4.87452	INAVA
actin filament capping (GO:0051693)	1/11	0.145603	0.443507	0.143188	0.42181	-2.52738	4.86994	SCIN
positive regulation of organelle assembly (GO:1902117)	3/48	0.030648	0.27457	0.02738	0.246744	-1.39323	4.85566	SPAG5;FSCN1;PROX1
cellular response to DNA damage stimulus (GO:0006974)	10/330	0.0200094	0.241532	0.012231	0.172479	-1.24088	4.85377	TOP2A;CDKN1A;BRIP1;CDK1;MAP3K20;PCLAF;MCM10;CLSPN;MASTL;DTL
regulation of extrinsic apoptotic signaling pathway in absence of ligand (GO:2001239)	2/28	0.0596305	0.401846	0.0560254	0.368008	-1.72055	4.85123	SNAI2;HSPA1A
cellular response to UV-B (GO:0071493)	1/9	0.120799	0.436606	0.120826	0.418203	-2.28428	4.82812	CDKN1A
regulation of transcription involved in cell fate commitment (GO:0060850)	1/8	0.10813	0.436606	0.109427	0.418203	-2.15351	4.79031	PROX1
protein-cofactor linkage (GO:0018065)	1/11	0.145603	0.443507	0.143188	0.42181	-2.47987	4.77838	GAD1
positive regulation of chromosome segregation (GO:0051984)	1/12	0.157742	0.445716	0.154156	0.423791	-2.57368	4.75306	CCNB1
negative regulation of ubiquitin protein ligase activity (GO:1904667)	4/78	0.0250264	0.258389	0.020926	0.234341	-1.28737	4.74758	CCNB1;UBE2C;CDK1;BUB1B
peptidyl-lysine modification (GO:0018205)	5/116	0.0249928	0.258389	0.0196073	0.227954	-1.2816	4.72804	TOP2A;BCL11A;CDCA8;BIRC5;AURKB
neurogenesis (GO:0022008)	3/51	0.0357842	0.311425	0.0317239	0.273497	-1.41117	4.69954	BCL11A;CHAC1;CIT
positive regulation of smooth muscle cell apoptotic process (GO:0034393)	1/9	0.120799	0.436606	0.120826	0.418203	-2.22182	4.69609	CDKN2A
Cdc42 protein signal transduction (GO:0032488)	1/10	0.133289	0.436606	0.132078	0.418203	-2.32911	4.6937	RHOV
positive regulation of telomerase activity (GO:0051973)	2/36	0.0923955	0.436606	0.0847978	0.418203	-1.96417	4.67801	NEK2;AURKB
positive regulation of myeloid cell apoptotic process (GO:0033034)	1/8	0.10813	0.436606	0.109427	0.418203	-2.09916	4.66943	CDKN2A
negative regulation of Notch signaling pathway (GO:0045746)	2/30	0.0673782	0.430149	0.0628401	0.39385	-1.73064	4.66829	CHAC1;FAM129B
protein localization to microtubule cytoskeleton (GO:0072698)	1/9	0.120799	0.436606	0.120826	0.418203	-2.1992	4.64828	MID2
regulation of bile acid biosynthetic process (GO:0070857)	1/10	0.133289	0.436606	0.132078	0.418203	-2.30597	4.64706	PROX1
mitotic DNA replication checkpoint (GO:0033314)	1/10	0.133289	0.436606	0.132078	0.418203	-2.29908	4.63318	CLSPN
protein localization to Golgi apparatus (GO:0034067)	2/24	0.0451688	0.341246	0.0432621	0.313753	-1.49266	4.62328	OBSL1;OPTN
glycine transport (GO:0015816)	1/10	0.133289	0.436606	0.132078	0.418203	-2.28975	4.61438	SLC36A3
stress-induced premature senescence (GO:0090400)	1/9	0.120799	0.436606	0.120826	0.418203	-2.17928	4.60618	CDKN1A
positive regulation of protein homooligomerization (GO:0032464)	1/10	0.133289	0.436606	0.132078	0.418203	-2.28092	4.59659	RHOC
cell migration involved in heart development (GO:0060973)	1/9	0.120799	0.436606	0.120826	0.418203	-2.17025	4.58711	SNAI2
embryonic organ development (GO:0048568)	3/54	0.0413342	0.334345	0.0364066	0.300994	-1.43599	4.57515	ALDH1A3;STIL;COBL
positive regulation of cell cycle (GO:0045787)	4/83	0.0305378	0.27457	0.0253654	0.240978	-1.31054	4.57221	CCNB1;PSRC1;PROX1;CKS1B
negative regulation of double-strand break repair via homologous recombination (GO:2000042)	1/9	0.120799	0.436606	0.120826	0.418203	-2.1587	4.56269	PARPBP
negative regulation of transcription from RNA polymerase II promoter in response to stress (GO:0097201)	1/11	0.145603	0.443507	0.143188	0.42181	-2.36675	4.56043	HSPA1A
negative regulation of vascular endothelial growth factor receptor signaling pathway (GO:0030948)	1/10	0.133289	0.436606	0.132078	0.418203	-2.2578	4.54999	FAM129B
cardiac muscle cell action potential involved in contraction (GO:0086002)	2/29	0.0634639	0.416619	0.0593986	0.380101	-1.64991	4.54927	SCN4B;CACNA1G
glucose import (GO:0046323)	1/10	0.133289	0.436606	0.132078	0.418203	-2.25169	4.53768	SLC2A6
G1/S transition of mitotic cell cycle (GO:0000082)	5/106	0.0176758	0.223618	0.0139851	0.185212	-1.12376	4.53502	CDKN1A;RRM2;CDKN2A;MCM10;CDKN3
protein localization to microtubule (GO:0035372)	1/9	0.120799	0.436606	0.120826	0.418203	-2.14465	4.53299	MID2
regulation of telomere maintenance via telomerase (GO:0032210)	3/52	0.0375885	0.318735	0.0332474	0.282881	-1.37957	4.52645	PIF1;NEK2;AURKB
positive regulation of mitotic metaphase/anaphase transition (GO:0045842)	1/9	0.120799	0.436606	0.120826	0.418203	-2.13353	4.50947	ESPL1
negative regulation of tumor necrosis factor production (GO:0032720)	2/36	0.0923955	0.436606	0.0847978	0.418203	-1.89195	4.50601	IL10;HAVCR2
negative regulation of cell cycle process (GO:0010948)	4/82	0.029383	0.267966	0.0244357	0.238562	-1.27445	4.49541	RRM2;E2F7;AURKB;E2F8
indolalkylamine catabolic process (GO:0046218)	1/10	0.133289	0.436606	0.132078	0.418203	-2.21955	4.47291	KYNU
regulation of cytokine secretion involved in immune response (GO:0002739)	1/10	0.133289	0.436606	0.132078	0.418203	-2.21535	4.46444	IL10
regulation of organ morphogenesis (GO:2000027)	1/10	0.133289	0.436606	0.132078	0.418203	-2.21424	4.46221	SAPCD2
regulation of phosphoprotein phosphatase activity (GO:0043666)	2/36	0.0923955	0.436606	0.0847978	0.418203	-1.87208	4.45868	PPP4R4;MASTL
positive regulation of dendrite development (GO:1900006)	2/33	0.0795759	0.436606	0.0735515	0.418203	-1.75528	4.44268	COBL;OBSL1
regulation of embryonic development (GO:0045995)	2/30	0.0673782	0.430149	0.0628401	0.39385	-1.64398	4.43453	CDK1;FAM129B
podosome assembly (GO:0071800)	1/10	0.133289	0.436606	0.132078	0.418203	-2.20019	4.4339	SH3PXD2B
Golgi inheritance (GO:0048313)	1/10	0.133289	0.436606	0.132078	0.418203	-2.19579	4.42503	CDK1
pinocytosis (GO:0006907)	1/10	0.133289	0.436606	0.132078	0.418203	-2.19014	4.41365	CARMIL1
adipose tissue development (GO:0060612)	1/10	0.133289	0.436606	0.132078	0.418203	-2.189	4.41135	SH3PXD2B
negative regulation of lymphocyte apoptotic process (GO:0070229)	1/10	0.133289	0.436606	0.132078	0.418203	-2.18824	4.40981	AURKB
calcium ion regulated exocytosis (GO:0017156)	1/12	0.157742	0.445716	0.154156	0.423791	-2.38118	4.39755	SCIN
negative regulation of telomerase activity (GO:0051974)	1/9	0.120799	0.436606	0.120826	0.418203	-2.078	4.39212	PIF1
regulation of striated muscle tissue development (GO:0016202)	1/10	0.133289	0.436606	0.132078	0.418203	-2.17502	4.38316	CENPF
chromosome organization (GO:0051276)	3/57	0.0472906	0.349477	0.041424	0.31232	-1.43602	4.38193	TOP2A;NUF2;CDCA8
regulation of integrin activation (GO:0033623)	1/10	0.133289	0.436606	0.132078	0.418203	-2.16461	4.36218	KIF14
DNA cytosine deamination (GO:0070383)	1/9	0.120799	0.436606	0.120826	0.418203	-2.06243	4.3592	AICDA
positive regulation of calcium ion import (GO:0090280)	1/11	0.145603	0.443507	0.143188	0.42181	-2.26075	4.35618	LGALS3
negative regulation of cellular component organization (GO:0051129)	3/55	0.0432749	0.341246	0.0380421	0.304938	-1.38388	4.34564	LGALS3;CARMIL1;HSPA1A
extracellular matrix disassembly (GO:0022617)	4/79	0.0260763	0.258389	0.0217723	0.236852	-1.19158	4.34536	SH3PXD2B;SPP1;LAMC2;ADAM8
cytidine to uridine editing (GO:0016554)	1/12	0.157742	0.445716	0.154156	0.423791	-2.35075	4.34134	AICDA
negative regulation of heterotypic cell-cell adhesion (GO:0034115)	1/10	0.133289	0.436606	0.132078	0.418203	-2.14835	4.32943	IL10
positive regulation of leukocyte degranulation (GO:0043302)	1/12	0.157742	0.445716	0.154156	0.423791	-2.34273	4.32655	ITGAM
regulation of cytoskeleton organization (GO:0051493)	4/96	0.0479744	0.349477	0.0393928	0.308165	-1.42112	4.31607	STMN1;FSCN1;RHOV;RHOC
regulation of cellular respiration (GO:0043457)	1/11	0.145603	0.443507	0.143188	0.42181	-2.23966	4.31554	ACTN3
positive regulation of myeloid cell differentiation (GO:0045639)	2/30	0.0673782	0.430149	0.0628401	0.39385	-1.5989	4.31292	SCIN;HSPA1A
regulation of cell-cell adhesion involved in gastrulation (GO:0070587)	1/10	0.133289	0.436606	0.132078	0.418203	-2.1386	4.30977	IL10
renal water homeostasis (GO:0003091)	2/32	0.0754371	0.436606	0.0699187	0.418203	-1.66662	4.3073	ADCY4;AQP4
negative regulation of BMP signaling pathway (GO:0030514)	2/33	0.0795759	0.436606	0.0735515	0.418203	-1.69879	4.29972	SOSTDC1;NBL1
negative regulation of inclusion body assembly (GO:0090084)	1/11	0.145603	0.443507	0.143188	0.42181	-2.2303	4.2975	HSPA1A
dicarboxylic acid biosynthetic process (GO:0043650)	1/11	0.145603	0.443507	0.143188	0.42181	-2.22664	4.29046	KYNU
negative regulation of DNA biosynthetic process (GO:2000279)	2/31	0.0713702	0.436606	0.0663476	0.410762	-1.6203	4.27738	PIF1;FAM129B
negative regulation of cell-cell adhesion (GO:0022408)	2/32	0.0754371	0.436606	0.0699187	0.418203	-1.65425	4.27533	IL10;SNAI2
positive regulation of calcium ion transport (GO:0051928)	2/34	0.0837837	0.436606	0.0772436	0.418203	-1.71784	4.25941	CCR1;LGALS3
divalent metal ion transport (GO:0070838)	4/89	0.0380248	0.318735	0.0313886	0.273171	-1.30074	4.2528	CCR1;CACNA1I;CCR5;CACNA1G
positive regulation of cell proliferation (GO:0008284)	11/425	0.0411242	0.334345	0.0246886	0.239495	-1.32656	4.23326	ESM1;CDKN1A;SAPCD2;RTKN2;S100A6;KIF14;BIRC5;LAMC2;TTK;PROX1;AREG
macrophage migration (GO:1905517)	1/11	0.145603	0.443507	0.143188	0.42181	-2.1817	4.20386	LGALS3
positive regulation of T cell apoptotic process (GO:0070234)	1/11	0.145603	0.443507	0.143188	0.42181	-2.17992	4.20043	ADAM8
negative regulation of cellular response to growth factor stimulus (GO:0090288)	3/56	0.0452605	0.341246	0.0397147	0.308165	-1.35558	4.19597	SOSTDC1;NBL1;FAM129B
maintenance of protein location in extracellular region (GO:0071694)	1/7	0.0952781	0.436606	0.0978825	0.418203	-1.77593	4.17514	NBL1
somatic hypermutation of immunoglobulin genes (GO:0016446)	1/13	0.169709	0.450986	0.164985	0.427766	-2.3526	4.17273	AICDA
positive regulation of protein maturation (GO:1903319)	1/10	0.133289	0.436606	0.132078	0.418203	-2.06965	4.17082	ADAM8
neural tube closure (GO:0001843)	2/34	0.0837837	0.436606	0.0772436	0.418203	-1.67014	4.14113	STIL;COBL
regulation of muscle organ development (GO:0048634)	1/9	0.120799	0.436606	0.120826	0.418203	-1.95841	4.13935	CENPF
regulation of spindle assembly (GO:0090169)	2/26	0.0522188	0.364813	0.049493	0.341076	-1.4017	4.13825	SPAG5;HSPA1A
serine family amino acid catabolic process (GO:0009071)	1/10	0.133289	0.436606	0.132078	0.418203	-2.05294	4.13715	AOC1
response to vitamin D (GO:0033280)	1/9	0.120799	0.436606	0.120826	0.418203	-1.95483	4.13179	SPP1
inhibition of cysteine-type endopeptidase activity involved in apoptotic process (GO:1990001)	1/12	0.157742	0.445716	0.154156	0.423791	-2.22429	4.1078	BIRC5
brain development (GO:0007420)	5/120	0.0283914	0.267966	0.0222182	0.237035	-1.15135	4.10074	ARNT2;CENPF;PROX1;DSCAML1;SHROOM4
positive regulation of MAP kinase activity (GO:0043406)	6/178	0.0419303	0.334345	0.0310321	0.27162	-1.2913	4.09567	CDK1;MAP3K20;ADAM8;MUC20;DUSP9;INAVA
negative regulation of B cell proliferation (GO:0030889)	1/11	0.145603	0.443507	0.143188	0.42181	-2.12418	4.09301	IL10
regulation of interleukin-8 production (GO:0032677)	2/35	0.0880578	0.436606	0.0809931	0.418203	-1.68242	4.08788	IL10;HSPA1A
positive regulation of lipase activity (GO:0060193)	1/11	0.145603	0.443507	0.143188	0.42181	-2.11972	4.08442	RHOC
regulation of protein serine/threonine kinase activity (GO:0071900)	4/81	0.0282545	0.267966	0.0235271	0.237035	-1.14249	4.07471	CDKN1A;CDKN2B;CDC25C;CDKN3
regulation of heart rate by cardiac conduction (GO:0086091)	2/36	0.0923955	0.436606	0.0847978	0.418203	-1.69523	4.03749	SCN4B;CACNA1G
regulation of immunoglobulin production (GO:0002637)	1/11	0.145603	0.443507	0.143188	0.42181	-2.09365	4.03419	IL10
positive regulation of actin filament depolymerization (GO:0030836)	1/12	0.157742	0.445716	0.154156	0.423791	-2.18003	4.02606	CARMIL1
regulation of morphogenesis of an epithelium (GO:1905330)	1/10	0.133289	0.436606	0.132078	0.418203	-1.99702	4.02446	SAPCD2
positive regulation of leukocyte apoptotic process (GO:2000108)	1/10	0.133289	0.436606	0.132078	0.418203	-1.9906	4.01153	CDKN2A
positive regulation of tumor necrosis factor secretion (GO:1904469)	1/12	0.157742	0.445716	0.154156	0.423791	-2.17089	4.00918	HAVCR2
chordate embryonic development (GO:0043009)	3/57	0.0472906	0.349477	0.041424	0.31232	-1.31107	4.00065	ARNT2;STIL;PROX1
positive regulation of telomere maintenance via telomerase (GO:0032212)	2/33	0.0795759	0.436606	0.0735515	0.418203	-1.57418	3.98432	NEK2;AURKB
regulation of hemopoiesis (GO:1903706)	1/12	0.157742	0.445716	0.154156	0.423791	-2.14441	3.96029	LGALS3
negative regulation of catenin import into nucleus (GO:0035414)	1/10	0.133289	0.436606	0.132078	0.418203	-1.95706	3.94393	SNAI2
DNA topological change (GO:0006265)	1/10	0.133289	0.436606	0.132078	0.418203	-1.95538	3.94054	TOP2A
positive regulation of lamellipodium assembly (GO:0010592)	1/14	0.181507	0.456045	0.175676	0.429395	-2.30642	3.93581	FSCN1
positive regulation of adaptive immune response based on somatic recombination of immune receptors built from immunoglobulin superfamily domains (GO:0002824)	1/11	0.145603	0.443507	0.143188	0.42181	-2.03952	3.92988	CCR2
protein trimerization (GO:0070206)	2/33	0.0795759	0.436606	0.0735515	0.418203	-1.54887	3.92026	MLKL;COL6A2
negative regulation of leukocyte activation (GO:0002695)	1/12	0.157742	0.445716	0.154156	0.423791	-2.12186	3.91864	HAVCR2
negative regulation of microtubule polymerization (GO:0031115)	1/10	0.133289	0.436606	0.132078	0.418203	-1.93796	3.90545	STMN1
positive regulation of megakaryocyte differentiation (GO:0045654)	1/7	0.0952781	0.436606	0.0978825	0.418203	-1.6541	3.88872	SCIN
G2 DNA damage checkpoint (GO:0031572)	2/33	0.0795759	0.436606	0.0735515	0.418203	-1.53524	3.88577	CLSPN;DTL
Golgi ribbon formation (GO:0090161)	1/12	0.157742	0.445716	0.154156	0.423791	-2.09704	3.87281	OPTN
regulation of tumor necrosis factor biosynthetic process (GO:0042534)	1/12	0.157742	0.445716	0.154156	0.423791	-2.09214	3.86374	CCR2
skeletal muscle thin filament assembly (GO:0030240)	1/11	0.145603	0.443507	0.143188	0.42181	-2.00441	3.86225	PROX1
organic cyclic compound catabolic process (GO:1901361)	1/12	0.157742	0.445716	0.154156	0.423791	-2.08669	3.85369	AOC1
embryonic eye morphogenesis (GO:0048048)	1/12	0.157742	0.445716	0.154156	0.423791	-2.08238	3.84572	ALDH1A3
regulation of podosome assembly (GO:0071801)	1/11	0.145603	0.443507	0.143188	0.42181	-1.98606	3.82688	FSCN1
negative regulation of tumor necrosis factor superfamily cytokine production (GO:1903556)	2/32	0.0754371	0.436606	0.0699187	0.418203	-1.47533	3.81292	IL10;HAVCR2
tryptophan metabolic process (GO:0006568)	1/11	0.145603	0.443507	0.143188	0.42181	-1.96718	3.79051	KYNU
retinal metabolic process (GO:0042574)	1/12	0.157742	0.445716	0.154156	0.423791	-2.03248	3.75357	ALDH1A3
negative regulation of growth (GO:0045926)	4/121	0.0939405	0.436606	0.0765764	0.418203	-1.58155	3.74052	CDKN1A;PSRC1;CDKN2A;HSPA1A
dicarboxylic acid catabolic process (GO:0043649)	1/14	0.181507	0.456045	0.175676	0.429395	-2.17742	3.71569	GAD1
negative regulation of ATP metabolic process (GO:1903579)	1/13	0.169709	0.450986	0.164985	0.427766	-2.09444	3.71484	ACTN3
regulation of T cell chemotaxis (GO:0010819)	1/11	0.145603	0.443507	0.143188	0.42181	-1.92711	3.71329	CCR2
regulation of T-helper 1 type immune response (GO:0002825)	1/10	0.133289	0.436606	0.132078	0.418203	-1.83512	3.6982	CCR2
positive regulation of interleukin-1 production (GO:0032732)	1/13	0.169709	0.450986	0.164985	0.427766	-2.07007	3.67162	INAVA
negative regulation of bone mineralization (GO:0030502)	1/12	0.157742	0.445716	0.154156	0.423791	-1.98721	3.66996	CCR1
regulation of inclusion body assembly (GO:0090083)	1/12	0.157742	0.445716	0.154156	0.423791	-1.98331	3.66277	HSPA1A
positive regulation of telomere maintenance via telomere lengthening (GO:1904358)	2/35	0.0880578	0.436606	0.0809931	0.418203	-1.5021	3.64976	NEK2;AURKB
activation of MAPK activity (GO:0000187)	5/118	0.0266575	0.258595	0.0208861	0.234341	-1.0061	3.64678	CDK1;MAP3K20;MUC20;DUSP9;INAVA
succinate metabolic process (GO:0006105)	1/9	0.120799	0.436606	0.120826	0.418203	-1.72403	3.64396	GAD1
response to sterol (GO:0036314)	1/12	0.157742	0.445716	0.154156	0.423791	-1.96906	3.63644	CCR5
regulation of apoptotic process (GO:0042981)	17/816	0.0746718	0.436606	0.0384486	0.304985	-1.40139	3.63613	IL10;TOP2A;WNT10B;LTK;STIL;ACTN3;GZMA;ARHGEF16;KIF14;FAM129B;SCIN;LGALS1;KRT18;CDK1;MAP3K20;BIRC5;HSPA1A
positive regulation of T-helper 1 type immune response (GO:0002827)	1/13	0.169709	0.450986	0.164985	0.427766	-2.04823	3.63288	CCR2
G-quadruplex DNA unwinding (GO:0044806)	1/8	0.10813	0.436606	0.109427	0.418203	-1.62942	3.62452	PIF1
positive regulation of cytosolic calcium ion concentration (GO:0007204)	5/134	0.042521	0.337289	0.033092	0.282881	-1.14746	3.6234	CCR1;CYSLTR1;CCR5;CCR3;CCR2
renal system development (GO:0072001)	3/60	0.0536445	0.373062	0.0467706	0.329776	-1.23827	3.6224	CENPF;PROX1;CEP55
exit from mitosis (GO:0010458)	1/13	0.169709	0.450986	0.164985	0.427766	-2.03949	3.61738	UBE2C
negative regulation of chondrocyte differentiation (GO:0032331)	1/13	0.169709	0.450986	0.164985	0.427766	-2.0369	3.61279	SNAI2
phosphate ion transport (GO:0006817)	1/14	0.181507	0.456045	0.175676	0.429395	-2.11414	3.60769	SLC17A7
tryptophan catabolic process (GO:0006569)	1/11	0.145603	0.443507	0.143188	0.42181	-1.86376	3.59124	KYNU
myosin filament assembly (GO:0031034)	1/12	0.157742	0.445716	0.154156	0.423791	-1.94337	3.589	OBSL1
cell-substrate junction assembly (GO:0007044)	1/12	0.157742	0.445716	0.154156	0.423791	-1.9398	3.58241	LAMC2
actin filament bundle organization (GO:0061572)	2/36	0.0923955	0.436606	0.0847978	0.418203	-1.49974	3.5719	FSCN1;RHOC
regulation of mononuclear cell migration (GO:0071675)	1/13	0.169709	0.450986	0.164985	0.427766	-2.01025	3.56551	LGALS3
DNA deamination (GO:0045006)	1/13	0.169709	0.450986	0.164985	0.427766	-2.0025	3.55177	AICDA
post-translational protein modification (GO:0043687)	10/358	0.0325458	0.288181	0.0201403	0.230629	-1.03359	3.54017	LGALS1;KBTBD6;LRR1;SPP1;IGFBP7;LMO7;ESCO2;OBSL1;DTL;FBXO44
positive regulation of cytoskeleton organization (GO:0051495)	3/78	0.099459	0.436606	0.0853464	0.418203	-1.53077	3.53303	CARMIL1;SPAG5;PROX1
embryonic organ morphogenesis (GO:0048562)	2/34	0.0837837	0.436606	0.0772436	0.418203	-1.41835	3.51682	ALDH1A3;DSCAML1
positive regulation of isomerase activity (GO:0010912)	1/8	0.10813	0.436606	0.109427	0.418203	-1.58079	3.51635	ITGAM
negative regulation of viral release from host cell (GO:1902187)	1/14	0.181507	0.456045	0.175676	0.429395	-2.05647	3.50928	MID2
cellular modified amino acid catabolic process (GO:0042219)	1/13	0.169709	0.450986	0.164985	0.427766	-1.97837	3.50896	CHAC1
purine nucleobase metabolic process (GO:0006144)	1/12	0.157742	0.445716	0.154156	0.423791	-1.89797	3.50516	GDA
muscle filament sliding (GO:0030049)	2/39	0.105764	0.436606	0.0965236	0.418203	-1.55807	3.50027	MYL4;ACTN3
negative regulation of muscle cell differentiation (GO:0051148)	1/16	0.204604	0.456909	0.19665	0.429395	-2.20263	3.49487	SOSTDC1
regulation of chromatin organization (GO:1902275)	1/11	0.145603	0.443507	0.143188	0.42181	-1.80219	3.4726	MKI67
sarcoplasmic reticulum calcium ion transport (GO:0070296)	1/10	0.133289	0.436606	0.132078	0.418203	-1.72113	3.46848	CCR5
histone phosphorylation (GO:0016572)	1/10	0.133289	0.436606	0.132078	0.418203	-1.71963	3.46545	CCNA2
replicative senescence (GO:0090399)	1/12	0.157742	0.445716	0.154156	0.423791	-1.87107	3.45549	CDKN2A
SA node cell action potential (GO:0086015)	1/8	0.10813	0.436606	0.109427	0.418203	-1.55315	3.45486	CACNA1G
sequestering of actin monomers (GO:0042989)	1/11	0.145603	0.443507	0.143188	0.42181	-1.77989	3.42962	SCIN
response to histamine (GO:0034776)	1/11	0.145603	0.443507	0.143188	0.42181	-1.77978	3.4294	AOC1
nitric oxide biosynthetic process (GO:0006809)	1/12	0.157742	0.445716	0.154156	0.423791	-1.85435	3.4246	NQO1
regulation of small GTPase mediated signal transduction (GO:0051056)	5/141	0.0509258	0.364132	0.0395835	0.308165	-1.14277	3.40246	ARHGAP11A;DEPDC1B;ARHGEF16;RHOV;RHOC
positive regulation of nuclease activity (GO:0032075)	1/11	0.145603	0.443507	0.143188	0.42181	-1.76429	3.39957	HSPA1A
positive regulation of superoxide anion generation (GO:0032930)	1/12	0.157742	0.445716	0.154156	0.423791	-1.83629	3.39125	ITGAM
response to UV-B (GO:0010224)	1/14	0.181507	0.456045	0.175676	0.429395	-1.98658	3.39002	CDKN1A
regulation of T cell differentiation in thymus (GO:0033081)	1/13	0.169709	0.450986	0.164985	0.427766	-1.90749	3.38325	ADAM8
positive regulation of endothelial cell chemotaxis (GO:2001028)	1/14	0.181507	0.456045	0.175676	0.429395	-1.97748	3.37449	FGF16
epithelial to mesenchymal transition (GO:0001837)	2/38	0.101251	0.436606	0.092565	0.418203	-1.47021	3.36701	SNAI2;S100A4
negative regulation of vascular smooth muscle cell proliferation (GO:1904706)	1/13	0.169709	0.450986	0.164985	0.427766	-1.89708	3.3648	IL10
positive regulation of heterotypic cell-cell adhesion (GO:0034116)	1/12	0.157742	0.445716	0.154156	0.423791	-1.82156	3.36405	IL10
cardiocyte differentiation (GO:0035051)	1/14	0.181507	0.456045	0.175676	0.429395	-1.96062	3.34572	PROX1
proline metabolic process (GO:0006560)	1/8	0.10813	0.436606	0.109427	0.418203	-1.50327	3.34391	AOC1
positive regulation of cell migration (GO:0030335)	6/222	0.0974381	0.436606	0.0728795	0.418203	-1.4353	3.34216	CCR1;CARMIL1;SNAI2;LAMC2;MADCAM1;CCR2
mitochondrial genome maintenance (GO:0000002)	1/14	0.181507	0.456045	0.175676	0.429395	-1.95032	3.32814	PIF1
actin-myosin filament sliding (GO:0033275)	2/39	0.105764	0.436606	0.0965236	0.418203	-1.48042	3.32583	MYL4;ACTN3
negative regulation of oxidative stress-induced neuron death (GO:1903204)	1/11	0.145603	0.443507	0.143188	0.42181	-1.72113	3.31639	IL10
necroptotic process (GO:0070266)	1/15	0.193138	0.456045	0.18623	0.429395	-2.0091	3.30367	MLKL
epithelial cell apoptotic process (GO:1904019)	1/10	0.133289	0.436606	0.132078	0.418203	-1.635	3.2949	IL10
amyloid-beta metabolic process (GO:0050435)	1/15	0.193138	0.456045	0.18623	0.429395	-2.00114	3.29058	BACE2
regulation of tumor necrosis factor secretion (GO:1904467)	1/16	0.204604	0.456909	0.19665	0.429395	-2.0719	3.28745	HAVCR2
cellular response to retinoic acid (GO:0071300)	2/43	0.124324	0.436606	0.112815	0.418203	-1.57194	3.27729	WNT10B;LTK
regulation of ventricular cardiac muscle cell membrane repolarization (GO:0060307)	1/15	0.193138	0.456045	0.18623	0.429395	-1.99135	3.27448	SCN4B
positive regulation of viral entry into host cell (GO:0046598)	1/9	0.120799	0.436606	0.120826	0.418203	-1.5406	3.25626	LGALS1
negative regulation of biomineral tissue development (GO:0070168)	1/15	0.193138	0.456045	0.18623	0.429395	-1.97311	3.24449	CCR1
monosaccharide transport (GO:0015749)	1/15	0.193138	0.456045	0.18623	0.429395	-1.97012	3.23957	SLC2A6
negative regulation of signal transduction by p53 class mediator (GO:1901797)	1/16	0.204604	0.456909	0.19665	0.429395	-2.04041	3.23748	SNAI2
signal transduction involved in G2 DNA damage checkpoint (GO:0072425)	1/13	0.169709	0.450986	0.164985	0.427766	-1.82055	3.22905	DTL
negative regulation of oxidoreductase activity (GO:0051354)	1/13	0.169709	0.450986	0.164985	0.427766	-1.81479	3.21883	GZMA
regulation of T cell apoptotic process (GO:0070232)	1/11	0.145603	0.443507	0.143188	0.42181	-1.6697	3.21729	LGALS3
myeloid cell differentiation (GO:0030099)	2/45	0.133877	0.436606	0.121209	0.418203	-1.59884	3.21501	DYRK3;CDKN2B
negative regulation of angiogenesis (GO:0016525)	3/70	0.0775531	0.436606	0.0668817	0.412392	-1.25618	3.21178	STAB1;FAM129B;CCR2
regulation of oxidoreductase activity (GO:0051341)	1/14	0.181507	0.456045	0.175676	0.429395	-1.8819	3.21138	GZMA
maintenance of gastrointestinal epithelium (GO:0030277)	1/14	0.181507	0.456045	0.175676	0.429395	-1.8813	3.21036	INAVA
cellular response to nitrogen compound (GO:1901699)	1/15	0.193138	0.456045	0.18623	0.429395	-1.9489	3.20468	AOC1
positive regulation of telomere maintenance (GO:0032206)	2/33	0.0795759	0.436606	0.0735515	0.418203	-1.26491	3.20155	NEK2;AURKB
negative regulation of endoplasmic reticulum stress-induced intrinsic apoptotic signaling pathway (GO:1902236)	1/15	0.193138	0.456045	0.18623	0.429395	-1.94482	3.19797	HSPA1A
eye photoreceptor cell differentiation (GO:0001754)	1/13	0.169709	0.450986	0.164985	0.427766	-1.80129	3.19489	DSCAM
regulation of amyloid precursor protein biosynthetic process (GO:0042984)	1/10	0.133289	0.436606	0.132078	0.418203	-1.58452	3.19318	BACE2
negative regulation of viral entry into host cell (GO:0046597)	1/16	0.204604	0.456909	0.19665	0.429395	-2.01241	3.19305	MID2
regulation of actin filament-based process (GO:0032970)	3/63	0.0603855	0.405142	0.0524401	0.35373	-1.1361	3.18905	FSCN1;RHOV;RHOC
negative regulation of cartilage development (GO:0061037)	1/14	0.181507	0.456045	0.175676	0.429395	-1.86728	3.18644	SNAI2
macrophage chemotaxis (GO:0048246)	1/11	0.145603	0.443507	0.143188	0.42181	-1.65294	3.18501	LGALS3
regulation of centriole replication (GO:0046599)	1/16	0.204604	0.456909	0.19665	0.429395	-2.0058	3.18256	STIL
regulation of interleukin-6 production (GO:0032675)	2/43	0.124324	0.436606	0.112815	0.418203	-1.52601	3.18152	IL10;INAVA
regulation of stress-activated MAPK cascade (GO:0032872)	2/42	0.119612	0.436606	0.108677	0.418203	-1.49776	3.1805	INAVA;MAPK8IP1
positive regulation of alpha-beta T cell proliferation (GO:0046641)	1/14	0.181507	0.456045	0.175676	0.429395	-1.85775	3.17017	CCR2
skeletal myofibril assembly (GO:0014866)	1/13	0.169709	0.450986	0.164985	0.427766	-1.78517	3.1663	PROX1
regulation of mitotic cell cycle spindle assembly checkpoint (GO:0090266)	1/15	0.193138	0.456045	0.18623	0.429395	-1.9196	3.15649	CCNB1
peptidyl-arginine modification (GO:0018195)	1/13	0.169709	0.450986	0.164985	0.427766	-1.76949	3.13849	PADI2
striated muscle contraction (GO:0006941)	3/62	0.0580962	0.395002	0.0505148	0.34655	-1.1014	3.13419	MYL4;OBSL1;SCN4B
DNA synthesis involved in DNA repair (GO:0000731)	3/66	0.0675021	0.430149	0.0584251	0.380101	-1.16124	3.13024	BRIP1;PCLAF;DTL
nonribosomal peptide biosynthetic process (GO:0019184)	1/13	0.169709	0.450986	0.164985	0.427766	-1.76478	3.13014	CHAC1
positive regulation of actin nucleation (GO:0051127)	1/14	0.181507	0.456045	0.175676	0.429395	-1.83314	3.12818	SCIN
regulation of water loss via skin (GO:0033561)	1/17	0.215908	0.460451	0.206938	0.429395	-2.0299	3.11164	STMN1
positive regulation of cell development (GO:0010720)	2/35	0.0880578	0.436606	0.0809931	0.418203	-1.27662	3.10187	PROX1;FAM129B
cell differentiation in hindbrain (GO:0021533)	1/13	0.169709	0.450986	0.164985	0.427766	-1.74841	3.1011	PROX1
negative regulation of hemopoiesis (GO:1903707)	1/15	0.193138	0.456045	0.18623	0.429395	-1.88546	3.10036	MEIS1
translesion synthesis (GO:0019985)	2/43	0.124324	0.436606	0.112815	0.418203	-1.48686	3.09989	PCLAF;DTL
regulation of cytosolic calcium ion concentration (GO:0051480)	5/138	0.047213	0.349477	0.0367134	0.300994	-1.01333	3.0938	CCR1;CYSLTR1;CCR5;CCR3;CCR2
negative regulation of phosphatase activity (GO:0010923)	3/69	0.0749816	0.436606	0.0647175	0.403954	-1.19356	3.09192	PPP4R4;KNL1;MASTL
positive regulation of homeostatic process (GO:0032846)	3/84	0.117327	0.436606	0.100458	0.418203	-1.44076	3.08725	SPP1;ADAM8;HSPA1A
negative regulation of receptor binding (GO:1900121)	1/12	0.157742	0.445716	0.154156	0.423791	-1.66755	3.07962	IL10
cognition (GO:0050890)	2/41	0.114947	0.436606	0.104581	0.418203	-1.41929	3.07034	SLC1A4;SHROOM4
catecholamine biosynthetic process (GO:0042423)	1/14	0.181507	0.456045	0.175676	0.429395	-1.79715	3.06676	AOC1
signal transduction involved in DNA damage checkpoint (GO:0072422)	1/14	0.181507	0.456045	0.175676	0.429395	-1.79472	3.06261	DTL
nitric oxide metabolic process (GO:0046209)	1/13	0.169709	0.450986	0.164985	0.427766	-1.72515	3.05984	NQO1
cAMP biosynthetic process (GO:0006171)	1/15	0.193138	0.456045	0.18623	0.429395	-1.86073	3.05969	ADCY4
negative regulation of myoblast differentiation (GO:0045662)	1/13	0.169709	0.450986	0.164985	0.427766	-1.72299	3.05602	SOSTDC1
positive regulation of viral life cycle (GO:1903902)	2/45	0.133877	0.436606	0.121209	0.418203	-1.51734	3.05111	TOP2A;LGALS1
establishment of skin barrier (GO:0061436)	1/17	0.215908	0.460451	0.206938	0.429395	-1.9896	3.04986	STMN1
regulation of leukocyte migration (GO:0002685)	1/14	0.181507	0.456045	0.175676	0.429395	-1.78679	3.04909	MADCAM1
glutathione biosynthetic process (GO:0006750)	1/12	0.157742	0.445716	0.154156	0.423791	-1.64856	3.04455	CHAC1
negative regulation of transmembrane receptor protein serine/threonine kinase signaling pathway (GO:0090101)	3/78	0.099459	0.436606	0.0853464	0.418203	-1.31368	3.03199	SOSTDC1;NBL1;HSPA1A
regulation of microtubule polymerization (GO:0031113)	2/36	0.0923955	0.436606	0.0847978	0.418203	-1.26936	3.02321	PSRC1;STMN1
modified amino acid transport (GO:0072337)	1/15	0.193138	0.456045	0.18623	0.429395	-1.83278	3.01373	SLC1A4
positive regulation of vascular smooth muscle cell proliferation (GO:1904707)	1/15	0.193138	0.456045	0.18623	0.429395	-1.83183	3.01218	IL10
regulation of multicellular organismal development (GO:2000026)	2/44	0.12908	0.436606	0.116993	0.418203	-1.46952	3.00858	IL10;CDK1
positive regulation of sodium ion transport (GO:0010765)	1/14	0.181507	0.456045	0.175676	0.429395	-1.76018	3.00368	SCN4B
negative regulation of proteolysis (GO:0045861)	2/42	0.119612	0.436606	0.108677	0.418203	-1.40921	2.99247	IL10;CHAC1
protein polymerization (GO:0051258)	2/46	0.138715	0.443507	0.125463	0.418203	-1.5105	2.98374	UBE2C;COBL
epiboly involved in wound healing (GO:0090505)	1/15	0.193138	0.456045	0.18623	0.429395	-1.80468	2.96752	RHOC
pancreas development (GO:0031016)	1/15	0.193138	0.456045	0.18623	0.429395	-1.80423	2.96678	PROX1
negative regulation of Rho protein signal transduction (GO:0035024)	1/15	0.193138	0.456045	0.18623	0.429395	-1.80298	2.96474	STMN1
negative regulation of interleukin-2 production (GO:0032703)	1/16	0.204604	0.456909	0.19665	0.429395	-1.85722	2.94681	HAVCR2
positive regulation of glucose metabolic process (GO:0010907)	1/12	0.157742	0.445716	0.154156	0.423791	-1.59492	2.94548	ACTN3
negative regulation of blood vessel morphogenesis (GO:2000181)	3/66	0.0675021	0.430149	0.0584251	0.380101	-1.08837	2.93379	STAB1;FAM129B;CCR2
urate metabolic process (GO:0046415)	1/12	0.157742	0.445716	0.154156	0.423791	-1.5876	2.93197	CARMIL1
regulation of receptor recycling (GO:0001919)	1/18	0.227051	0.460451	0.217094	0.429395	-1.97748	2.93177	OPTN
cardiac muscle contraction (GO:0060048)	2/37	0.0967941	0.436606	0.0886558	0.418203	-1.25438	2.9292	MYL4;SCN4B
regulation of calcineurin-NFAT signaling cascade (GO:0070884)	1/15	0.193138	0.456045	0.18623	0.429395	-1.78123	2.92896	ACTN3
regulation of superoxide anion generation (GO:0032928)	1/14	0.181507	0.456045	0.175676	0.429395	-1.71353	2.92407	ITGAM
positive regulation of macrophage activation (GO:0043032)	1/18	0.227051	0.460451	0.217094	0.429395	-1.97099	2.92215	ITGAM
synaptic vesicle cycle (GO:0099504)	1/14	0.181507	0.456045	0.175676	0.429395	-1.71102	2.91978	SLC17A7
regulation of protein modification by small protein conjugation or removal (GO:1903320)	1/15	0.193138	0.456045	0.18623	0.429395	-1.77545	2.91946	HSPA1A
regulation of oxidative phosphorylation (GO:0002082)	1/10	0.133289	0.436606	0.132078	0.418203	-1.44665	2.91534	ACTN3
negative regulation of hydrogen peroxide-induced cell death (GO:1903206)	1/15	0.193138	0.456045	0.18623	0.429395	-1.77083	2.91187	IL10
regulation of actin cytoskeleton organization (GO:0032956)	3/76	0.0937679	0.436606	0.0805436	0.418203	-1.22842	2.9076	FSCN1;RHOV;RHOC
G-protein coupled receptor signaling pathway, coupled to cyclic nucleotide second messenger (GO:0007187)	4/126	0.104975	0.436606	0.0855755	0.418203	-1.28571	2.89803	CCR1;CYSLTR1;ADCY4;CCR3
negative regulation of interleukin-12 production (GO:0032695)	1/13	0.169709	0.450986	0.164985	0.427766	-1.63375	2.89773	IL10
striated muscle myosin thick filament assembly (GO:0071688)	1/14	0.181507	0.456045	0.175676	0.429395	-1.69581	2.89383	OBSL1
regulation of interferon-gamma production (GO:0032649)	2/44	0.12908	0.436606	0.116993	0.418203	-1.41241	2.89167	CCR2;HAVCR2
regulation of interleukin-1 beta production (GO:0032651)	1/14	0.181507	0.456045	0.175676	0.429395	-1.69078	2.88525	INAVA
regulation of I-kappaB kinase/NF-kappaB signaling (GO:0043122)	6/205	0.0727764	0.436606	0.0541165	0.361489	-1.09629	2.87268	LGALS1;S100A4;RHOC;OPTN;MID2;INAVA
positive regulation of extracellular matrix organization (GO:1903055)	1/12	0.157742	0.445716	0.154156	0.423791	-1.55199	2.86621	FSCN1
positive regulation of myotube differentiation (GO:0010831)	1/17	0.215908	0.460451	0.206938	0.429395	-1.86156	2.85359	FAM129B
positive regulation of reactive oxygen species metabolic process (GO:2000379)	2/40	0.11033	0.436606	0.10053	0.418203	-1.29112	2.84599	CDKN1A;ITGAM
calcium ion transport (GO:0006816)	4/119	0.0896894	0.436606	0.0731179	0.418203	-1.17572	2.83514	CCR1;CACNA1I;CCR5;CACNA1G
endothelial cell differentiation (GO:0045446)	1/14	0.181507	0.456045	0.175676	0.429395	-1.65934	2.83159	PROX1
DNA metabolic process (GO:0006259)	8/315	0.0812872	0.436606	0.056059	0.368008	-1.12661	2.82753	TOP2A;PIF1;BRIP1;CDK1;PCLAF;MCM10;CLSPN;CDC25C
fluid transport (GO:0042044)	1/15	0.193138	0.456045	0.18623	0.429395	-1.70644	2.80598	AQP4
mesenchymal cell differentiation (GO:0048762)	2/42	0.119612	0.436606	0.108677	0.418203	-1.32095	2.80504	SNAI2;S100A4
positive regulation of I-kappaB kinase/NF-kappaB signaling (GO:0043123)	5/164	0.084899	0.436606	0.0660529	0.410606	-1.13527	2.7999	LGALS1;S100A4;RHOC;MID2;INAVA
response to corticosteroid (GO:0031960)	1/12	0.157742	0.445716	0.154156	0.423791	-1.51466	2.79727	IL10
mitotic sister chromatid cohesion (GO:0007064)	1/16	0.204604	0.456909	0.19665	0.429395	-1.76156	2.79503	CDCA5
negative regulation of chromatin silencing (GO:0031936)	1/10	0.133289	0.436606	0.132078	0.418203	-1.38603	2.79318	AICDA
cellular response to ionizing radiation (GO:0071479)	2/47	0.143589	0.443507	0.129752	0.418203	-1.43835	2.79154	CDKN1A;MAP3K20
negative regulation of cytokine production involved in immune response (GO:0002719)	1/16	0.204604	0.456909	0.19665	0.429395	-1.75383	2.78276	IL10
neuron apoptotic process (GO:0051402)	1/17	0.215908	0.460451	0.206938	0.429395	-1.81048	2.7753	CIT
regulation of extracellular matrix disassembly (GO:0010715)	1/15	0.193138	0.456045	0.18623	0.429395	-1.68525	2.77115	FSCN1
positive regulation of defense response (GO:0031349)	3/75	0.0909746	0.436606	0.0781879	0.418203	-1.15533	2.76953	ADAM8;OPTN;CCR2
establishment of mitotic spindle orientation (GO:0000132)	1/15	0.193138	0.456045	0.18623	0.429395	-1.67954	2.76176	SAPCD2
neural crest cell differentiation (GO:0014033)	1/16	0.204604	0.456909	0.19665	0.429395	-1.73913	2.75944	SNAI2
cardiac atrium morphogenesis (GO:0003209)	1/18	0.227051	0.460451	0.217094	0.429395	-1.86009	2.75773	PROX1
retinoic acid metabolic process (GO:0042573)	1/16	0.204604	0.456909	0.19665	0.429395	-1.738	2.75765	ALDH1A3
steroid catabolic process (GO:0006706)	1/14	0.181507	0.456045	0.175676	0.429395	-1.61056	2.74836	SPP1
positive regulation of membrane protein ectodomain proteolysis (GO:0051044)	1/16	0.204604	0.456909	0.19665	0.429395	-1.70571	2.70642	ADAM8
water transport (GO:0006833)	1/14	0.181507	0.456045	0.175676	0.429395	-1.58124	2.69833	AQP4
hexose transport (GO:0008645)	1/17	0.215908	0.460451	0.206938	0.429395	-1.75958	2.69726	SLC2A6
response to unfolded protein (GO:0006986)	2/44	0.12908	0.436606	0.116993	0.418203	-1.31658	2.69547	OPTN;HSPA1A
negative regulation of chemokine production (GO:0032682)	1/14	0.181507	0.456045	0.175676	0.429395	-1.57654	2.6903	IL10
regulation of secretion (GO:0051046)	1/15	0.193138	0.456045	0.18623	0.429395	-1.62981	2.67998	SCIN
mesenchymal cell development (GO:0014031)	1/16	0.204604	0.456909	0.19665	0.429395	-1.6833	2.67086	SNAI2
negative regulation of DNA recombination (GO:0045910)	1/17	0.215908	0.460451	0.206938	0.429395	-1.73622	2.66147	PARPBP
cellular response to cytokine stimulus (GO:0071345)	11/457	0.0626299	0.416619	0.0383824	0.304985	-0.956955	2.65126	IL10;CCR1;CDKN1A;ITGAM;IL1R2;FSCN1;BIRC5;AQP4;CCR5;CCR2;IL13RA1
regulation of keratinocyte proliferation (GO:0010837)	1/19	0.238037	0.468991	0.227121	0.438409	-1.84366	2.64626	SNAI2
cardiac muscle cell differentiation (GO:0055007)	1/16	0.204604	0.456909	0.19665	0.429395	-1.66747	2.64574	PROX1
regulation of DNA metabolic process (GO:0051052)	2/47	0.143589	0.443507	0.129752	0.418203	-1.3579	2.6354	PIF1;ESCO2
Golgi to plasma membrane transport (GO:0006893)	2/40	0.11033	0.436606	0.10053	0.418203	-1.19466	2.63337	RAB26;OPTN
negative regulation of stress fiber assembly (GO:0051497)	1/18	0.227051	0.460451	0.217094	0.429395	-1.76952	2.62346	STMN1
negative regulation of DNA metabolic process (GO:0051053)	2/44	0.12908	0.436606	0.116993	0.418203	-1.28032	2.62123	AICDA;FAM129B
nitric oxide mediated signal transduction (GO:0007263)	1/16	0.204604	0.456909	0.19665	0.429395	-1.64779	2.61451	KLRG1
stem cell development (GO:0048864)	1/15	0.193138	0.456045	0.18623	0.429395	-1.58913	2.61309	SNAI2
positive regulation of alpha-beta T cell activation (GO:0046635)	1/16	0.204604	0.456909	0.19665	0.429395	-1.6439	2.60834	CCR2
negative regulation of cell growth (GO:0030308)	4/116	0.0834921	0.436606	0.0680839	0.418112	-1.04879	2.60416	CDKN1A;PSRC1;CDKN2A;HSPA1A
hyaluronan catabolic process (GO:0030214)	1/17	0.215908	0.460451	0.206938	0.429395	-1.69534	2.5988	HMMR
positive regulation of tumor necrosis factor production (GO:0032760)	2/48	0.1485	0.445716	0.134074	0.420154	-1.36167	2.59695	CCR2;HAVCR2
regulation of transcription from RNA polymerase I promoter (GO:0006356)	1/18	0.227051	0.460451	0.217094	0.429395	-1.74976	2.59416	RASL11A
positive regulation of acute inflammatory response (GO:0002675)	1/16	0.204604	0.456909	0.19665	0.429395	-1.62902	2.58474	ADAM8
establishment or maintenance of actin cytoskeleton polarity (GO:0030950)	1/15	0.193138	0.456045	0.18623	0.429395	-1.5694	2.58064	RHOC
DNA replication checkpoint (GO:0000076)	1/18	0.227051	0.460451	0.217094	0.429395	-1.73685	2.57503	CLSPN
regulation of fibroblast proliferation (GO:0048145)	2/47	0.143589	0.443507	0.129752	0.418203	-1.31973	2.56133	CDKN1A;S100A6
regulation of bicellular tight junction assembly (GO:2000810)	1/17	0.215908	0.460451	0.206938	0.429395	-1.66994	2.55986	SNAI2
purine-containing compound catabolic process (GO:0072523)	1/15	0.193138	0.456045	0.18623	0.429395	-1.5535	2.5545	GDA
positive regulation of immune system process (GO:0002684)	1/17	0.215908	0.460451	0.206938	0.429395	-1.66284	2.54898	MADCAM1
positive regulation of interleukin-4 production (GO:0032753)	1/16	0.204604	0.456909	0.19665	0.429395	-1.60477	2.54625	HAVCR2
neuron cell-cell adhesion (GO:0007158)	1/15	0.193138	0.456045	0.18623	0.429395	-1.54743	2.54452	NINJ2
regulation of lipase activity (GO:0060191)	1/15	0.193138	0.456045	0.18623	0.429395	-1.54625	2.54258	RHOC
positive regulation of neural precursor cell proliferation (GO:2000179)	1/15	0.193138	0.456045	0.18623	0.429395	-1.54343	2.53795	PROX1
regulation of T cell activation (GO:0050863)	2/45	0.133877	0.436606	0.121209	0.418203	-1.26167	2.537	LGALS3;CCR2
regulation of cardiac muscle cell membrane repolarization (GO:0099623)	1/19	0.238037	0.468991	0.227121	0.438409	-1.76387	2.53174	SCN4B
regulation of phosphorylation (GO:0042325)	4/120	0.0918031	0.436606	0.0748369	0.418203	-1.0596	2.53044	CDKN1A;CDKN2B;DSCAM;CDKN2A
ribonucleoprotein complex disassembly (GO:0032988)	1/14	0.181507	0.456045	0.175676	0.429395	-1.47664	2.51983	DYRK3
response to cholesterol (GO:0070723)	1/16	0.204604	0.456909	0.19665	0.429395	-1.58715	2.5183	CCR5
macrophage activation (GO:0042116)	1/18	0.227051	0.460451	0.217094	0.429395	-1.69608	2.51458	ITGAM
actin filament bundle assembly (GO:0051017)	2/38	0.101251	0.436606	0.092565	0.418203	-1.09567	2.50925	FSCN1;RHOC
hemidesmosome assembly (GO:0031581)	1/12	0.157742	0.445716	0.154156	0.423791	-1.35747	2.50697	LAMC2
regulation of chemokine production (GO:0032642)	1/19	0.238037	0.468991	0.227121	0.438409	-1.74194	2.50026	SNAI2
positive regulation of osteoclast differentiation (GO:0045672)	1/15	0.193138	0.456045	0.18623	0.429395	-1.51534	2.49175	CCR1
positive regulation of protein kinase activity (GO:0045860)	5/173	0.100781	0.436606	0.0785635	0.418203	-1.08004	2.47848	TPX2;CENPE;CDKN1A;KIF14;CLSPN
establishment of apical/basal cell polarity (GO:0035089)	1/13	0.169709	0.450986	0.164985	0.427766	-1.39315	2.47099	FSCN1
selective autophagy (GO:0061912)	1/16	0.204604	0.456909	0.19665	0.429395	-1.5561	2.46903	STBD1
regulation of cell junction assembly (GO:1901888)	1/16	0.204604	0.456909	0.19665	0.429395	-1.55513	2.46749	SNAI2
regulation of mitochondrial outer membrane permeabilization involved in apoptotic signaling pathway (GO:1901028)	1/18	0.227051	0.460451	0.217094	0.429395	-1.66389	2.46685	HSPA1A
negative regulation of DNA damage response, signal transduction by p53 class mediator (GO:0043518)	1/13	0.169709	0.450986	0.164985	0.427766	-1.38845	2.46264	SNAI2
insulin secretion (GO:0030073)	1/19	0.238037	0.468991	0.227121	0.438409	-1.71438	2.4607	KLRG1
regulation of actin nucleation (GO:0051125)	1/17	0.215908	0.460451	0.206938	0.429395	-1.60001	2.45267	SCIN
Ras protein signal transduction (GO:0007265)	6/224	0.1006	0.436606	0.0753046	0.418203	-1.06444	2.44461	CCNA2;CDKN1A;CDKN2A;RAB26;RHOV;RHOC
positive regulation of stress-activated protein kinase signaling cascade (GO:0070304)	1/16	0.204604	0.456909	0.19665	0.429395	-1.53886	2.44168	INAVA
cardiac epithelial to mesenchymal transition (GO:0060317)	1/17	0.215908	0.460451	0.206938	0.429395	-1.59037	2.43789	SNAI2
negative regulation of interleukin-8 production (GO:0032717)	1/18	0.227051	0.460451	0.217094	0.429395	-1.62922	2.41545	IL10
negative regulation of NF-kappaB import into nucleus (GO:0042347)	1/17	0.215908	0.460451	0.206938	0.429395	-1.5677	2.40314	IL10
negative regulation of extrinsic apoptotic signaling pathway (GO:2001237)	3/77	0.0965962	0.436606	0.0829299	0.418203	-1.02286	2.39066	LGALS3;SNAI2;HSPA1A
leukocyte adhesion to vascular endothelial cell (GO:0061756)	1/17	0.215908	0.460451	0.206938	0.429395	-1.55321	2.38092	MADCAM1
cytoplasmic sequestering of transcription factor (GO:0042994)	1/17	0.215908	0.460451	0.206938	0.429395	-1.55035	2.37654	IL10
regulation of myelination (GO:0031641)	1/18	0.227051	0.460451	0.217094	0.429395	-1.58823	2.35467	KIF14
postreplication repair (GO:0006301)	2/48	0.1485	0.445716	0.134074	0.420154	-1.22971	2.34527	PCLAF;DTL
regulation of transposition (GO:0010528)	1/18	0.227051	0.460451	0.217094	0.429395	-1.58101	2.34397	AICDA
cellular response to gamma radiation (GO:0071480)	1/18	0.227051	0.460451	0.217094	0.429395	-1.57599	2.33653	MAP3K20
programmed necrotic cell death (GO:0097300)	1/17	0.215908	0.460451	0.206938	0.429395	-1.51694	2.32533	MLKL
regulation of intrinsic apoptotic signaling pathway in response to DNA damage (GO:1902229)	1/17	0.215908	0.460451	0.206938	0.429395	-1.51059	2.31559	SNAI2
septin ring assembly (GO:0000921)	1/16	0.204604	0.456909	0.19665	0.429395	-1.45853	2.31422	ANLN
substantia nigra development (GO:0021762)	2/44	0.12908	0.436606	0.116993	0.418203	-1.12984	2.31314	PADI2;SYNGR3
establishment or maintenance of apical/basal cell polarity (GO:0035088)	1/19	0.238037	0.468991	0.227121	0.438409	-1.61034	2.31137	FSCN1
negative regulation of metabolic process (GO:0009892)	1/13	0.169709	0.450986	0.164985	0.427766	-1.29952	2.30491	GZMA
negative regulation of telomere maintenance via telomerase (GO:0032211)	1/21	0.259544	0.479715	0.246793	0.4496	-1.70177	2.2954	PIF1
vitamin D metabolic process (GO:0042359)	1/16	0.204604	0.456909	0.19665	0.429395	-1.44428	2.29161	CUBN
negative regulation of sequence-specific DNA binding transcription factor activity (GO:0043433)	4/141	0.141329	0.443507	0.115453	0.418203	-1.16961	2.28854	CDKN2A;PROX1;GLIS2;HAVCR2
leukocyte tethering or rolling (GO:0050901)	1/17	0.215908	0.460451	0.206938	0.429395	-1.4913	2.28602	MADCAM1
positive regulation of protein processing (GO:0010954)	1/18	0.227051	0.460451	0.217094	0.429395	-1.5401	2.28332	ADAM8
negative regulation of intracellular transport (GO:0032387)	1/18	0.227051	0.460451	0.217094	0.429395	-1.53874	2.28131	HSPA1A
positive regulation of striated muscle cell differentiation (GO:0051155)	1/18	0.227051	0.460451	0.217094	0.429395	-1.53804	2.28026	PROX1
negative regulation of anoikis (GO:2000811)	1/16	0.204604	0.456909	0.19665	0.429395	-1.43421	2.27563	SNAI2
toll-like receptor 4 signaling pathway (GO:0034142)	1/16	0.204604	0.456909	0.19665	0.429395	-1.42884	2.2671	ITGAM
cytoskeleton organization (GO:0007010)	4/127	0.107251	0.436606	0.0874348	0.418203	-1.01509	2.26627	ANLN;RTKN2;RHOV;OBSL1
positive regulation of ion transport (GO:0043270)	2/47	0.143589	0.443507	0.129752	0.418203	-1.16072	2.25273	CCR1;SCN4B
purine-containing compound metabolic process (GO:0072521)	1/18	0.227051	0.460451	0.217094	0.429395	-1.51732	2.24955	CARMIL1
negative regulation of lymphocyte activation (GO:0051250)	1/20	0.248867	0.474968	0.23702	0.445164	-1.61567	2.24714	LGALS3
amino acid transport (GO:0006865)	2/49	0.153444	0.445716	0.138429	0.42181	-1.19416	2.23835	SLC36A3;SLC1A4
base conversion or substitution editing (GO:0016553)	1/16	0.204604	0.456909	0.19665	0.429395	-1.40904	2.23569	AICDA
negative regulation of T cell receptor signaling pathway (GO:0050860)	1/15	0.193138	0.456045	0.18623	0.429395	-1.35949	2.23547	LGALS3
activation of NF-kappaB-inducing kinase activity (GO:0007250)	1/17	0.215908	0.460451	0.206938	0.429395	-1.45397	2.22881	TNFSF15
inhibition of cysteine-type endopeptidase activity (GO:0097340)	1/16	0.204604	0.456909	0.19665	0.429395	-1.40368	2.2272	BIRC5
regulation of protein homooligomerization (GO:0032462)	1/16	0.204604	0.456909	0.19665	0.429395	-1.3988	2.21944	RHOC
macromolecule biosynthetic process (GO:0009059)	1/20	0.248867	0.474968	0.23702	0.445164	-1.59393	2.21689	IL10
neurotransmitter transport (GO:0006836)	1/17	0.215908	0.460451	0.206938	0.429395	-1.43887	2.20564	SLC17A7
positive regulation of transporter activity (GO:0032411)	1/15	0.193138	0.456045	0.18623	0.429395	-1.33658	2.19781	SYNGR3
regulation of interleukin-4 production (GO:0032673)	1/16	0.204604	0.456909	0.19665	0.429395	-1.3782	2.18676	HAVCR2
actin filament polymerization (GO:0030041)	1/19	0.238037	0.468991	0.227121	0.438409	-1.52002	2.18173	COBL
cyclic nucleotide biosynthetic process (GO:0009190)	1/20	0.248867	0.474968	0.23702	0.445164	-1.56695	2.17937	ADCY4
regulation of intracellular signal transduction (GO:1902531)	9/423	0.149734	0.445716	0.103258	0.418203	-1.14162	2.16782	ARHGAP11A;TPX2;BRIP1;DEPDC1B;ARHGEF16;RHOV;RHOC;OPTN;AURKB
negative regulation of B cell activation (GO:0050869)	1/18	0.227051	0.460451	0.217094	0.429395	-1.46174	2.16715	IL10
positive regulation of mRNA processing (GO:0050685)	1/17	0.215908	0.460451	0.206938	0.429395	-1.41312	2.16618	HSPA1A
negative regulation of protein localization to cell periphery (GO:1904376)	1/20	0.248867	0.474968	0.23702	0.445164	-1.55571	2.16373	SAPCD2
positive regulation of supramolecular fiber organization (GO:1902905)	3/85	0.120415	0.436606	0.103075	0.418203	-1.01999	2.15912	CARMIL1;PSRC1;PROX1
regulation of interferon-alpha production (GO:0032647)	1/17	0.215908	0.460451	0.206938	0.429395	-1.39552	2.1392	HAVCR2
ruffle organization (GO:0031529)	1/17	0.215908	0.460451	0.206938	0.429395	-1.39549	2.13915	CARMIL1
negative regulation of viral genome replication (GO:0045071)	2/51	0.163425	0.450986	0.147229	0.423791	-1.18072	2.13876	PROX1;AICDA
cytokine-mediated signaling pathway (GO:0019221)	13/634	0.119333	0.436606	0.0720817	0.418203	-0.999058	2.12383	IL10;CCR1;CDKN1A;ITGAM;TNFSF15;CD70;IL1R2;IL1RL1;FSCN1;BIRC5;CCR5;CCR2;IL13RA1
cellular response to inorganic substance (GO:0071241)	1/18	0.227051	0.460451	0.217094	0.429395	-1.4317	2.12261	AOC1
negative regulation of G-protein coupled receptor protein signaling pathway (GO:0045744)	1/22	0.270069	0.487341	0.256442	0.454669	-1.61847	2.1187	STMN1
negative regulation of apoptotic process (GO:0043066)	11/486	0.087563	0.436606	0.054759	0.364183	-0.869739	2.11816	IL10;LTK;STIL;KRT18;KIF14;CDK1;BIRC5;SNAI2;ADAM8;FAM129B;HSPA1A
response to organonitrogen compound (GO:0010243)	2/52	0.168459	0.450986	0.151672	0.423791	-1.18685	2.11386	KYNU;INAVA
regulation of cartilage development (GO:0061035)	1/16	0.204604	0.456909	0.19665	0.429395	-1.33012	2.11048	SCIN
negative regulation of smoothened signaling pathway (GO:0045879)	1/20	0.248867	0.474968	0.23702	0.445164	-1.51518	2.10737	GLIS2
regulation of anoikis (GO:2000209)	1/21	0.259544	0.479715	0.246793	0.4496	-1.55616	2.09899	SNAI2
negative regulation of cellular biosynthetic process (GO:0031327)	2/48	0.1485	0.445716	0.134074	0.420154	-1.09751	2.09314	SNAI2;PROX1
heart contraction (GO:0060047)	2/45	0.133877	0.436606	0.121209	0.418203	-1.03701	2.08526	MYL4;SCN4B
positive regulation of response to biotic stimulus (GO:0002833)	1/18	0.227051	0.460451	0.217094	0.429395	-1.4044	2.08213	OPTN
regulation of calcium ion-dependent exocytosis (GO:0017158)	2/54	0.178602	0.456045	0.160635	0.427766	-1.20372	2.07353	CACNA1I;CACNA1G
nervous system development (GO:0007399)	10/456	0.116473	0.436606	0.0765999	0.418203	-0.962689	2.06988	ARNT2;STIL;DSCAM;BCL11A;GDA;NINJ2;PROX1;CHAC1;NBL1;DSCAML1
positive regulation of transforming growth factor beta receptor signaling pathway (GO:0030511)	1/20	0.248867	0.474968	0.23702	0.445164	-1.48696	2.06812	CDKN2B
cell projection assembly (GO:0030031)	1/21	0.259544	0.479715	0.246793	0.4496	-1.53102	2.06509	RHOV
positive regulation of T cell migration (GO:2000406)	1/21	0.259544	0.479715	0.246793	0.4496	-1.52995	2.06365	CCR2
negative regulation of viral process (GO:0048525)	1/22	0.270069	0.487341	0.256442	0.454669	-1.57148	2.05718	MID2
negative regulation of transposition (GO:0010529)	1/20	0.248867	0.474968	0.23702	0.445164	-1.47331	2.04913	AICDA
aromatic amino acid family catabolic process (GO:0009074)	1/21	0.259544	0.479715	0.246793	0.4496	-1.50836	2.03453	KYNU
purine nucleotide catabolic process (GO:0006195)	1/15	0.193138	0.456045	0.18623	0.429395	-1.23275	2.02708	GDA
positive regulation of mitotic cell cycle (GO:0045931)	2/53	0.173518	0.456045	0.156141	0.426169	-1.15334	2.02004	CCNB1;NUSAP1
covalent chromatin modification (GO:0016569)	1/21	0.259544	0.479715	0.246793	0.4496	-1.49499	2.01649	AURKB
cell morphogenesis involved in differentiation (GO:0000904)	2/55	0.183709	0.456045	0.165152	0.427766	-1.1804	2.00007	KIF14;PROX1
androgen metabolic process (GO:0008209)	1/21	0.259544	0.479715	0.246793	0.4496	-1.47709	1.99234	SPP1
negative regulation of cAMP biosynthetic process (GO:0030818)	1/22	0.270069	0.487341	0.256442	0.454669	-1.51486	1.98307	CCR2
muscle tissue morphogenesis (GO:0060415)	1/20	0.248867	0.474968	0.23702	0.445164	-1.42413	1.98073	PROX1
negative regulation of calcium-mediated signaling (GO:0050849)	1/19	0.238037	0.468991	0.227121	0.438409	-1.37805	1.97796	ACTN3
glucan catabolic process (GO:0009251)	1/19	0.238037	0.468991	0.227121	0.438409	-1.36964	1.96589	STBD1
regulation of lymphocyte proliferation (GO:0050670)	1/16	0.204604	0.456909	0.19665	0.429395	-1.23759	1.96365	LGALS3
negative regulation of cellular carbohydrate metabolic process (GO:0010677)	1/18	0.227051	0.460451	0.217094	0.429395	-1.32404	1.96299	ACTN3
cellular response to lipid (GO:0071396)	5/179	0.112137	0.436606	0.0875637	0.418203	-0.897056	1.96279	IL10;WNT10B;LTK;SPP1;CCR5
negative regulation of protein processing (GO:0010955)	1/16	0.204604	0.456909	0.19665	0.429395	-1.23674	1.96231	CHAC1
membrane protein ectodomain proteolysis (GO:0006509)	1/19	0.238037	0.468991	0.227121	0.438409	-1.36319	1.95662	BACE2
eye morphogenesis (GO:0048592)	1/21	0.259544	0.479715	0.246793	0.4496	-1.45002	1.95583	ALDH1A3
positive regulation of interleukin-10 production (GO:0032733)	1/23	0.280446	0.490378	0.265967	0.458741	-1.51681	1.92844	INAVA
regulation of lamellipodium organization (GO:1902743)	1/18	0.227051	0.460451	0.217094	0.429395	-1.29567	1.92093	CARMIL1
B cell differentiation (GO:0030183)	2/53	0.173518	0.456045	0.156141	0.426169	-1.09666	1.92077	IL10;AICDA
response to retinoic acid (GO:0032526)	2/58	0.199149	0.456909	0.178832	0.429395	-1.18883	1.91842	WNT10B;LTK
protein complex localization (GO:0031503)	1/23	0.280446	0.490378	0.265967	0.458741	-1.50639	1.91519	BIRC5
vitamin transport (GO:0051180)	1/24	0.290675	0.497973	0.275372	0.467548	-1.54519	1.90916	CUBN
ventricular septum morphogenesis (GO:0060412)	1/22	0.270069	0.487341	0.256442	0.454669	-1.45621	1.90629	PROX1
focal adhesion assembly (GO:0048041)	1/19	0.238037	0.468991	0.227121	0.438409	-1.32806	1.90621	ACTN3
regulation of microtubule depolymerization (GO:0031114)	1/23	0.280446	0.490378	0.265967	0.458741	-1.4952	1.90097	MAP1A
regulation of endoplasmic reticulum stress-induced intrinsic apoptotic signaling pathway (GO:1902235)	1/21	0.259544	0.479715	0.246793	0.4496	-1.40812	1.89931	HSPA1A
negative regulation of cytokine biosynthetic process (GO:0042036)	1/22	0.270069	0.487341	0.256442	0.454669	-1.44381	1.89006	IL10
embryonic digit morphogenesis (GO:0042733)	1/17	0.215908	0.460451	0.206938	0.429395	-1.22887	1.88374	MAP3K20
positive regulation of actin filament polymerization (GO:0030838)	2/52	0.168459	0.450986	0.151672	0.423791	-1.05691	1.88243	CARMIL1;SCIN
action potential (GO:0001508)	2/55	0.183709	0.456045	0.165152	0.427766	-1.10645	1.87477	CACNA1I;CACNA1G
negative regulation of myeloid cell differentiation (GO:0045638)	1/23	0.280446	0.490378	0.265967	0.458741	-1.47101	1.87021	MEIS1
regulation of BMP signaling pathway (GO:0030510)	2/57	0.193984	0.456909	0.174252	0.429395	-1.13179	1.85611	SOSTDC1;NBL1
positive chemotaxis (GO:0050918)	1/18	0.227051	0.460451	0.217094	0.429395	-1.25127	1.85511	LGALS3
intracellular estrogen receptor signaling pathway (GO:0030520)	1/20	0.248867	0.474968	0.23702	0.445164	-1.33264	1.85348	PADI2
cell-substrate adherens junction assembly (GO:0007045)	1/19	0.238037	0.468991	0.227121	0.438409	-1.29008	1.8517	ACTN3
hyaluronan metabolic process (GO:0030212)	1/22	0.270069	0.487341	0.256442	0.454669	-1.41222	1.84871	HMMR
purine nucleotide metabolic process (GO:0006163)	1/21	0.259544	0.479715	0.246793	0.4496	-1.36611	1.84265	GDA
positive regulation of immune response (GO:0050778)	2/55	0.183709	0.456045	0.165152	0.427766	-1.08712	1.84202	ITGAM;ADAM8
negative regulation of macromolecule biosynthetic process (GO:0010558)	1/21	0.259544	0.479715	0.246793	0.4496	-1.36508	1.84126	IL10
regulation of vascular endothelial growth factor receptor signaling pathway (GO:0030947)	1/23	0.280446	0.490378	0.265967	0.458741	-1.44611	1.83855	FAM129B
negative regulation of actin filament bundle assembly (GO:0032232)	1/21	0.259544	0.479715	0.246793	0.4496	-1.36242	1.83767	STMN1
small GTPase mediated signal transduction (GO:0007264)	3/100	0.169971	0.450986	0.14532	0.423791	-1.0368	1.83734	CCNA2;CDKN1A;CDKN2A
mitotic G2 DNA damage checkpoint (GO:0007095)	1/18	0.227051	0.460451	0.217094	0.429395	-1.23603	1.83252	CLSPN
positive regulation of ATP metabolic process (GO:1903580)	1/24	0.290675	0.497973	0.275372	0.467548	-1.48031	1.82899	ACTN3
hexose transmembrane transport (GO:0035428)	1/20	0.248867	0.474968	0.23702	0.445164	-1.31338	1.82669	SLC2A6
positive regulation of cellular response to transforming growth factor beta stimulus (GO:1903846)	1/20	0.248867	0.474968	0.23702	0.445164	-1.31268	1.82572	CDKN2B
positive regulation of protein localization to membrane (GO:1905477)	3/96	0.156215	0.445716	0.133544	0.420154	-0.983319	1.82555	ITGAM;ARHGEF16;GZMB
STAT cascade (GO:0097696)	1/23	0.280446	0.490378	0.265967	0.458741	-1.42987	1.8179	CCR2
negative regulation of programmed cell death (GO:0043069)	9/409	0.129847	0.436606	0.0886866	0.418203	-0.889371	1.81556	IL10;LTK;STIL;KRT18;KIF14;CDK1;BIRC5;FAM129B;HSPA1A
regulation of lamellipodium assembly (GO:0010591)	1/26	0.310701	0.504476	0.293822	0.469068	-1.54963	1.8114	FSCN1
urogenital system development (GO:0001655)	1/23	0.280446	0.490378	0.265967	0.458741	-1.41727	1.80188	CEP55
DNA replication initiation (GO:0006270)	1/25	0.30076	0.501705	0.284656	0.469068	-1.49823	1.80004	MCM10
negative regulation of protein import into nucleus (GO:0042308)	1/23	0.280446	0.490378	0.265967	0.458741	-1.41311	1.7966	SNAI2
chemokine-mediated signaling pathway (GO:0070098)	2/53	0.173518	0.456045	0.156141	0.426169	-1.02349	1.79261	CCR1;CCR2
negative regulation of cyclase activity (GO:0031280)	1/21	0.259544	0.479715	0.246793	0.4496	-1.32841	1.7918	CCR2
negative regulation of double-strand break repair (GO:2000780)	1/20	0.248867	0.474968	0.23702	0.445164	-1.28582	1.78836	PARPBP
regulation of mitotic spindle assembly (GO:1901673)	1/20	0.248867	0.474968	0.23702	0.445164	-1.28153	1.78239	HSPA1A
axon development (GO:0061564)	3/95	0.152833	0.445716	0.130654	0.418203	-0.947535	1.77986	MAP1A;S100A6;DSCAML1
peptide hormone secretion (GO:0030072)	1/26	0.310701	0.504476	0.293822	0.469068	-1.51816	1.77461	KLRG1
chaperone-mediated protein complex assembly (GO:0051131)	1/18	0.227051	0.460451	0.217094	0.429395	-1.19308	1.76884	HSPA1A
positive regulation of dendrite morphogenesis (GO:0050775)	1/17	0.215908	0.460451	0.206938	0.429395	-1.15363	1.7684	OBSL1
cellular polysaccharide catabolic process (GO:0044247)	1/20	0.248867	0.474968	0.23702	0.445164	-1.2646	1.75885	STBD1
endocytosis (GO:0006897)	6/264	0.174407	0.456045	0.133118	0.420154	-1.00671	1.75808	CUBN;NEURL1B;IGKC;STAB1;AMPH;RHOV
regulation of viral release from host cell (GO:1902186)	1/26	0.310701	0.504476	0.293822	0.469068	-1.50166	1.75532	MID2
DNA ligation (GO:0006266)	1/19	0.238037	0.468991	0.227121	0.438409	-1.221	1.75254	TOP2A
cellular protein complex assembly (GO:0043623)	4/145	0.151773	0.445716	0.124104	0.418203	-0.928855	1.75124	CENPE;ANLN;CENPF;HSPA1A
positive regulation of erythrocyte differentiation (GO:0045648)	1/23	0.280446	0.490378	0.265967	0.458741	-1.37378	1.74659	HSPA1A
apoptotic nuclear changes (GO:0030262)	1/24	0.290675	0.497973	0.275372	0.467548	-1.41247	1.74517	TOP2A
regulation of catenin import into nucleus (GO:0035412)	1/20	0.248867	0.474968	0.23702	0.445164	-1.25058	1.73935	SNAI2
regulation of calcium ion import (GO:0090279)	1/23	0.280446	0.490378	0.265967	0.458741	-1.367	1.73797	LGALS3
negative regulation of antigen receptor-mediated signaling pathway (GO:0050858)	1/18	0.227051	0.460451	0.217094	0.429395	-1.1721	1.73773	LGALS3
positive regulation of transcription from RNA polymerase I promoter (GO:0045943)	1/22	0.270069	0.487341	0.256442	0.454669	-1.32077	1.72898	RASL11A
aorta morphogenesis (GO:0035909)	1/17	0.215908	0.460451	0.206938	0.429395	-1.12628	1.72647	PROX1
positive regulation of axon extension (GO:0045773)	1/20	0.248867	0.474968	0.23702	0.445164	-1.23863	1.72273	DSCAM
tetrapyrrole metabolic process (GO:0033013)	1/22	0.270069	0.487341	0.256442	0.454669	-1.31436	1.72059	CUBN
nucleotide catabolic process (GO:0009166)	1/18	0.227051	0.460451	0.217094	0.429395	-1.15862	1.71774	GDA
negative regulation of actin filament polymerization (GO:0030837)	1/23	0.280446	0.490378	0.265967	0.458741	-1.3363	1.69894	SCIN
negative regulation of response to endoplasmic reticulum stress (GO:1903573)	1/23	0.280446	0.490378	0.265967	0.458741	-1.33583	1.69834	HSPA1A
chaperone mediated protein folding requiring cofactor (GO:0051085)	1/25	0.30076	0.501705	0.284656	0.469068	-1.39758	1.67911	HSPA1A
cobalamin metabolic process (GO:0009235)	1/22	0.270069	0.487341	0.256442	0.454669	-1.27624	1.6707	CUBN
positive regulation of DNA biosynthetic process (GO:2000573)	2/56	0.188837	0.456045	0.169692	0.429395	-1.00211	1.67039	NEK2;AURKB
dopamine metabolic process (GO:0042417)	1/21	0.259544	0.479715	0.246793	0.4496	-1.23494	1.66573	AOC1
wound healing, spreading of cells (GO:0044319)	1/21	0.259544	0.479715	0.246793	0.4496	-1.23267	1.66267	RHOC
activation of protein kinase A activity (GO:0034199)	1/17	0.215908	0.460451	0.206938	0.429395	-1.08147	1.6578	ADCY4
limb development (GO:0060173)	1/25	0.30076	0.501705	0.284656	0.469068	-1.36971	1.64563	MAP3K20
response to UV (GO:0009411)	3/99	0.166499	0.450986	0.142344	0.42181	-0.913473	1.63764	PCLAF;DTL;AURKB
positive regulation of neutrophil migration (GO:1902624)	1/26	0.310701	0.504476	0.293822	0.469068	-1.39794	1.63408	ADAM8
positive regulation of interleukin-2 production (GO:0032743)	1/21	0.259544	0.479715	0.246793	0.4496	-1.20926	1.63109	CCR2
regulation of DNA biosynthetic process (GO:2000278)	1/23	0.280446	0.490378	0.265967	0.458741	-1.2774	1.62406	FAM129B
DNA geometric change (GO:0032392)	1/25	0.30076	0.501705	0.284656	0.469068	-1.34561	1.61667	PIF1
cellular nitrogen compound biosynthetic process (GO:0044271)	1/24	0.290675	0.497973	0.275372	0.467548	-1.30589	1.61349	NQO1
ventricular cardiac muscle tissue development (GO:0003229)	1/22	0.270069	0.487341	0.256442	0.454669	-1.23077	1.61117	PROX1
intrinsic apoptotic signaling pathway in response to endoplasmic reticulum stress (GO:0070059)	1/25	0.30076	0.501705	0.284656	0.469068	-1.33855	1.60819	CHAC1
regulation of DNA damage response, signal transduction by p53 class mediator (GO:0043516)	1/26	0.310701	0.504476	0.293822	0.469068	-1.37315	1.60511	SNAI2
regulation of interleukin-10 production (GO:0032653)	1/26	0.310701	0.504476	0.293822	0.469068	-1.3699	1.60131	INAVA
regulation of DNA binding (GO:0051101)	2/53	0.173518	0.456045	0.156141	0.426169	-0.912392	1.59803	GZMA;CDCA5
response to light stimulus (GO:0009416)	2/59	0.20433	0.456909	0.183431	0.429395	-1.00622	1.59789	PCLAF;DTL
histone modification (GO:0016570)	3/99	0.166499	0.450986	0.142344	0.42181	-0.889486	1.59464	CCNA2;PADI2;AURKB
cellular response to ammonium ion (GO:0071242)	1/24	0.290675	0.497973	0.275372	0.467548	-1.28448	1.58704	AOC1
positive regulation of filopodium assembly (GO:0051491)	1/26	0.310701	0.504476	0.293822	0.469068	-1.35694	1.58616	FSCN1
plasma membrane invagination (GO:0099024)	3/104	0.184061	0.456045	0.157424	0.427766	-0.936734	1.58541	ITGAM;IGKC;AURKB
cell morphogenesis involved in neuron differentiation (GO:0048667)	3/98	0.163049	0.450986	0.139389	0.42181	-0.87129	1.58026	MAP1A;S100A6;DSCAML1
positive regulation of cell morphogenesis involved in differentiation (GO:0010770)	2/59	0.20433	0.456909	0.183431	0.429395	-0.99198	1.57528	CARMIL1;OBSL1
regulation of heterotypic cell-cell adhesion (GO:0034114)	1/20	0.248867	0.474968	0.23702	0.445164	-1.12814	1.56906	IL10
glutamate metabolic process (GO:0006536)	1/22	0.270069	0.487341	0.256442	0.454669	-1.1928	1.56147	GAD1
positive regulation of protein targeting to membrane (GO:0090314)	1/23	0.280446	0.490378	0.265967	0.458741	-1.22671	1.55961	ITGAM
embryonic skeletal system morphogenesis (GO:0048704)	1/22	0.270069	0.487341	0.256442	0.454669	-1.19039	1.55831	DSCAML1
regulation of axon extension involved in axon guidance (GO:0048841)	1/24	0.290675	0.497973	0.275372	0.467548	-1.25898	1.55553	DSCAM
protein homotrimerization (GO:0070207)	1/23	0.280446	0.490378	0.265967	0.458741	-1.22302	1.55491	MLKL
negative regulation of protein polymerization (GO:0032272)	1/23	0.280446	0.490378	0.265967	0.458741	-1.22289	1.55475	STMN1
cellular response to epidermal growth factor stimulus (GO:0071364)	1/26	0.310701	0.504476	0.293822	0.469068	-1.32499	1.54881	SNAI2
neuromuscular junction development (GO:0007528)	1/21	0.259544	0.479715	0.246793	0.4496	-1.14545	1.54502	CACNB4
respiratory tube development (GO:0030323)	1/26	0.310701	0.504476	0.293822	0.469068	-1.31382	1.53576	PROX1
protein phosphorylation (GO:0006468)	10/471	0.135265	0.440191	0.089921	0.418203	-0.760621	1.52164	CCNA2;DYRK3;LTK;CDK1;MAP3K20;BIRC5;NEK2;CLSPN;MASTL;AURKB
positive regulation of programmed cell death (GO:0043068)	6/258	0.162148	0.450986	0.123358	0.418203	-0.83487	1.51883	TOP2A;WNT10B;SCIN;GZMA;ARHGEF16;MAP3K20
regulation of centrosome duplication (GO:0010824)	1/26	0.310701	0.504476	0.293822	0.469068	-1.29008	1.508	STIL
negative regulation of viral life cycle (GO:1903901)	2/62	0.219957	0.460451	0.197326	0.429395	-0.99579	1.50795	PROX1;MID2
glucose transport (GO:0015758)	1/23	0.280446	0.490378	0.265967	0.458741	-1.18206	1.50284	SLC2A6
negative regulation of viral transcription (GO:0032897)	1/24	0.290675	0.497973	0.275372	0.467548	-1.21245	1.49805	MID2
positive regulation of leukocyte chemotaxis (GO:0002690)	2/62	0.219957	0.460451	0.197326	0.429395	-0.988084	1.49628	CCR1;CCR2
positive regulation of cytokine production (GO:0001819)	5/221	0.206522	0.459172	0.164136	0.427766	-0.941224	1.48464	IL10;INAVA;CCR2;HAVCR2;HSPA1A
positive regulation of neuron differentiation (GO:0045666)	3/99	0.166499	0.450986	0.142344	0.42181	-0.827617	1.48372	LTK;PROX1;NBL1
positive regulation of kinase activity (GO:0033674)	3/114	0.220499	0.460451	0.188934	0.429395	-0.968838	1.46475	CENPE;CDKN1A;LTK
cellular protein modification process (GO:0006464)	18/1002	0.182577	0.456045	0.102712	0.418203	-0.859233	1.4612	DYRK3;LTK;LRR1;LMO7;FBXO44;DUSP9;AURKB;FUT7;LGALS1;KBTBD6;SPP1;CDK1;MAP3K20;BIRC5;NEK2;IGFBP7;OBSL1;DTL
cGMP metabolic process (GO:0046068)	1/29	0.339689	0.520993	0.320625	0.487337	-1.35177	1.45954	ADCY4
peptide catabolic process (GO:0043171)	1/26	0.310701	0.504476	0.293822	0.469068	-1.24561	1.45602	CHAC1
kidney development (GO:0001822)	2/64	0.23043	0.464828	0.20666	0.429395	-0.990628	1.45405	CENPF;PROX1
glycogen catabolic process (GO:0005980)	1/19	0.238037	0.468991	0.227121	0.438409	-1.01092	1.45101	STBD1
cyclic nucleotide metabolic process (GO:0009187)	1/26	0.310701	0.504476	0.293822	0.469068	-1.24083	1.45043	ADCY4
positive regulation of transcription regulatory region DNA binding (GO:2000679)	1/20	0.248867	0.474968	0.23702	0.445164	-1.04064	1.44736	FAM129B
negative regulation of lyase activity (GO:0051350)	1/23	0.280446	0.490378	0.265967	0.458741	-1.13695	1.44549	CCR2
regulation of tumor necrosis factor production (GO:0032680)	2/62	0.219957	0.460451	0.197326	0.429395	-0.945669	1.43205	IL10;HAVCR2
positive regulation of leukocyte cell-cell adhesion (GO:1903039)	1/22	0.270069	0.487341	0.256442	0.454669	-1.09285	1.43062	CCR2
stress-activated MAPK cascade (GO:0051403)	2/63	0.225189	0.460451	0.201987	0.429395	-0.956731	1.42631	MAP3K20;DUSP9
B cell proliferation (GO:0042100)	1/30	0.349079	0.528477	0.329333	0.494487	-1.35169	1.4226	IL10
receptor clustering (GO:0043113)	1/25	0.30076	0.501705	0.284656	0.469068	-1.18243	1.42063	MADCAM1
second-messenger-mediated signaling (GO:0019932)	2/63	0.225189	0.460451	0.201987	0.429395	-0.95061	1.41718	CCR5;KLRG1
camera-type eye development (GO:0043010)	1/25	0.30076	0.501705	0.284656	0.469068	-1.17843	1.41581	ALDH1A3
response to alcohol (GO:0097305)	1/26	0.310701	0.504476	0.293822	0.469068	-1.2105	1.41499	CCR5
regulation of cell motility (GO:2000145)	3/110	0.205738	0.458099	0.176133	0.429395	-0.890408	1.40787	KIF14;AMOTL1;RHOC
regulation of stress fiber assembly (GO:0051492)	2/61	0.214736	0.460451	0.192679	0.429395	-0.913791	1.40573	CARMIL1;STMN1
heterotypic cell-cell adhesion (GO:0034113)	1/26	0.310701	0.504476	0.293822	0.469068	-1.20199	1.40504	MADCAM1
serine family amino acid metabolic process (GO:0009069)	1/18	0.227051	0.460451	0.217094	0.429395	-0.947607	1.4049	AOC1
positive regulation of protein oligomerization (GO:0032461)	1/24	0.290675	0.497973	0.275372	0.467548	-1.13568	1.40319	RHOC
negative regulation of adenylate cyclase activity (GO:0007194)	1/21	0.259544	0.479715	0.246793	0.4496	-1.03478	1.39575	CCR2
carboxylic acid catabolic process (GO:0046395)	1/29	0.339689	0.520993	0.320625	0.487337	-1.29111	1.39405	HMMR
positive regulation of immune effector process (GO:0002699)	1/25	0.30076	0.501705	0.284656	0.469068	-1.15959	1.39318	CCR2
regulation of cell growth (GO:0001558)	5/202	0.160891	0.450986	0.126722	0.418203	-0.760379	1.38924	CDKN1A;PSRC1;CDKN2A;KIF14;HSPA1A
positive regulation of microtubule polymerization or depolymerization (GO:0031112)	1/25	0.30076	0.501705	0.284656	0.469068	-1.1544	1.38695	PSRC1
regulation of T cell proliferation (GO:0042129)	2/63	0.225189	0.460451	0.201987	0.429395	-0.927967	1.38343	IL10;LGALS3
positive regulation of catabolic process (GO:0009896)	2/63	0.225189	0.460451	0.201987	0.429395	-0.927737	1.38308	ACTN3;DTL
positive regulation of nuclear division (GO:0051785)	1/26	0.310701	0.504476	0.293822	0.469068	-1.18262	1.38239	NUSAP1
DNA conformation change (GO:0071103)	1/19	0.238037	0.468991	0.227121	0.438409	-0.961247	1.37971	TOP2A
cellular response to copper ion (GO:0071280)	1/22	0.270069	0.487341	0.256442	0.454669	-1.0527	1.37807	AOC1
synaptic transmission, cholinergic (GO:0007271)	1/29	0.339689	0.520993	0.320625	0.487337	-1.27593	1.37766	NQO1
regulation of cell migration (GO:0030334)	7/317	0.166191	0.450986	0.122554	0.418203	-0.764556	1.37208	CCR1;CARMIL1;KIF14;SNAI2;LAMC2;AMOTL1;RHOC
regulation of supramolecular fiber organization (GO:1902903)	1/27	0.320502	0.510057	0.302871	0.474561	-1.20194	1.36764	MAP1A
regulation of transcription regulatory region DNA binding (GO:2000677)	1/27	0.320502	0.510057	0.302871	0.474561	-1.20178	1.36746	FAM129B
response to gamma radiation (GO:0010332)	1/27	0.320502	0.510057	0.302871	0.474561	-1.19801	1.36317	MAP3K20
regulation of cell division (GO:0051302)	2/66	0.240934	0.472256	0.21604	0.429395	-0.957123	1.36221	KIF18B;AURKB
mitotic G2/M transition checkpoint (GO:0044818)	1/24	0.290675	0.497973	0.275372	0.467548	-1.10211	1.36171	CLSPN
negative regulation of intrinsic apoptotic signaling pathway (GO:2001243)	2/63	0.225189	0.460451	0.201987	0.429395	-0.91262	1.36055	SNAI2;HSPA1A
cellular modified amino acid biosynthetic process (GO:0042398)	1/25	0.30076	0.501705	0.284656	0.469068	-1.13087	1.35867	CHAC1
negative regulation of cell-matrix adhesion (GO:0001953)	1/28	0.330164	0.515275	0.311805	0.481622	-1.22353	1.35588	CDKN2A
NAD biosynthetic process (GO:0009435)	1/23	0.280446	0.490378	0.265967	0.458741	-1.06293	1.35138	KYNU
digestive system development (GO:0055123)	1/23	0.280446	0.490378	0.265967	0.458741	-1.05497	1.34126	COBL
substrate adhesion-dependent cell spreading (GO:0034446)	1/33	0.376458	0.545524	0.354795	0.511697	-1.36178	1.33039	KIF14
response to copper ion (GO:0046688)	1/26	0.310701	0.504476	0.293822	0.469068	-1.13542	1.32722	AOC1
superoxide metabolic process (GO:0006801)	1/30	0.349079	0.528477	0.329333	0.494487	-1.25771	1.32368	SH3PXD2B
negative regulation of interferon-gamma production (GO:0032689)	1/21	0.259544	0.479715	0.246793	0.4496	-0.981043	1.32326	HAVCR2
cellular response to UV (GO:0034644)	2/68	0.25146	0.476929	0.225459	0.438409	-0.958362	1.32299	CDKN1A;AURKB
regulation of protein localization to nucleus (GO:1900180)	1/28	0.330164	0.515275	0.311805	0.481622	-1.18912	1.31774	CDK1
eosinophil migration (GO:0072677)	1/25	0.30076	0.501705	0.284656	0.469068	-1.08878	1.30811	LGALS3
cGMP biosynthetic process (GO:0006182)	1/25	0.30076	0.501705	0.284656	0.469068	-1.08813	1.30732	ADCY4
positive regulation of cellular catabolic process (GO:0031331)	3/107	0.194824	0.456909	0.1667	0.429395	-0.797536	1.3045	ADAM8;OPTN;MID2
regulation of viral genome replication (GO:0045069)	2/64	0.23043	0.464828	0.20666	0.429395	-0.885976	1.30044	TOP2A;PROX1
embryonic skeletal system development (GO:0048706)	1/22	0.270069	0.487341	0.256442	0.454669	-0.986568	1.29149	DSCAML1
Golgi vesicle transport (GO:0048193)	6/272	0.191323	0.456045	0.146686	0.423791	-0.77845	1.2874	CENPE;KIF2C;KIF23;KIF11;AREG;KIF15
negative regulation of cell adhesion (GO:0007162)	2/66	0.240934	0.472256	0.21604	0.429395	-0.902786	1.28487	DSCAM;SNAI2
eosinophil chemotaxis (GO:0048245)	1/25	0.30076	0.501705	0.284656	0.469068	-1.06793	1.28306	LGALS3
regulation of cell cycle G1/S phase transition (GO:1902806)	1/25	0.30076	0.501705	0.284656	0.469068	-1.06135	1.27515	KIF14
cyclic purine nucleotide metabolic process (GO:0052652)	1/31	0.358336	0.534521	0.337929	0.499191	-1.23149	1.26386	ADCY4
response to glucocorticoid (GO:0051384)	1/25	0.30076	0.501705	0.284656	0.469068	-1.04905	1.26038	IL10
regulation of voltage-gated calcium channel activity (GO:1901385)	1/26	0.310701	0.504476	0.293822	0.469068	-1.07709	1.25903	CACNB4
nucleobase-containing small molecule interconversion (GO:0015949)	1/32	0.367462	0.542817	0.346416	0.506812	-1.25297	1.25439	RRM2
regulation of cellular senescence (GO:2000772)	1/25	0.30076	0.501705	0.284656	0.469068	-1.04364	1.25388	CDKN2A
negative regulation of lymphocyte proliferation (GO:0050672)	1/30	0.349079	0.528477	0.329333	0.494487	-1.19063	1.25309	IL10
negative regulation of epithelial cell proliferation (GO:0050680)	2/67	0.246195	0.474968	0.220745	0.435486	-0.893865	1.25287	CDKN2B;SNAI2
negative regulation of neuron apoptotic process (GO:0043524)	2/64	0.23043	0.464828	0.20666	0.429395	-0.849956	1.24757	KIF14;ADAM8
neuron projection morphogenesis (GO:0048812)	4/164	0.204958	0.45703	0.16865	0.429395	-0.785693	1.24528	MAP1A;S100A6;NBL1;DSCAML1
regulation of double-strand break repair via homologous recombination (GO:0010569)	1/28	0.330164	0.515275	0.311805	0.481622	-1.12056	1.24177	PARPBP
regulation of cell adhesion mediated by integrin (GO:0033628)	1/31	0.358336	0.534521	0.337929	0.499191	-1.20796	1.23971	SNAI2
regulation of telomere maintenance (GO:0032204)	1/26	0.310701	0.504476	0.293822	0.469068	-1.059	1.23789	PIF1
positive regulation of embryonic development (GO:0040019)	1/26	0.310701	0.504476	0.293822	0.469068	-1.0583	1.23707	FAM129B
cAMP metabolic process (GO:0046058)	1/25	0.30076	0.501705	0.284656	0.469068	-1.02762	1.23463	ADCY4
negative regulation of apoptotic signaling pathway (GO:2001234)	2/66	0.240934	0.472256	0.21604	0.429395	-0.862074	1.22693	LGALS3;HSPA1A
NAD metabolic process (GO:0019674)	1/24	0.290675	0.497973	0.275372	0.467548	-0.992993	1.22689	KYNU
negative regulation of telomere maintenance via telomere lengthening (GO:1904357)	1/27	0.320502	0.510057	0.302871	0.474561	-1.07291	1.22082	PIF1
cytoskeleton-dependent intracellular transport (GO:0030705)	1/27	0.320502	0.510057	0.302871	0.474561	-1.06912	1.21652	KIF14
regulation of calcium ion transmembrane transporter activity (GO:1901019)	1/28	0.330164	0.515275	0.311805	0.481622	-1.09688	1.21552	CACNB4
homophilic cell adhesion via plasma membrane adhesion molecules (GO:0007156)	2/65	0.235679	0.468991	0.211345	0.429395	-0.83954	1.21337	DSCAM;DSCAML1
negative regulation of response to DNA damage stimulus (GO:2001021)	1/29	0.339689	0.520993	0.320625	0.487337	-1.11674	1.20578	SNAI2
cellular response to ketone (GO:1901655)	1/29	0.339689	0.520993	0.320625	0.487337	-1.11082	1.19937	SPP1
response to organic cyclic compound (GO:0014070)	2/70	0.261998	0.4826	0.234907	0.445164	-0.895012	1.1988	KYNU;SPP1
regulation of DNA replication (GO:0006275)	2/62	0.219957	0.460451	0.197326	0.429395	-0.785297	1.18919	ESCO2;AREG
negative regulation of T cell proliferation (GO:0042130)	1/25	0.30076	0.501705	0.284656	0.469068	-0.985837	1.18443	IL10
positive regulation of cell projection organization (GO:0031346)	2/64	0.23043	0.464828	0.20666	0.429395	-0.80437	1.18066	CARMIL1;LTK
negative regulation of intrinsic apoptotic signaling pathway in response to DNA damage (GO:1902230)	1/25	0.30076	0.501705	0.284656	0.469068	-0.9784	1.17549	SNAI2
negative regulation of interleukin-6 production (GO:0032715)	1/25	0.30076	0.501705	0.284656	0.469068	-0.974957	1.17136	IL10
negative regulation of catalytic activity (GO:0043086)	1/27	0.320502	0.510057	0.302871	0.474561	-1.01869	1.15913	GZMA
positive regulation of protein polymerization (GO:0032273)	2/65	0.235679	0.468991	0.211345	0.429395	-0.798412	1.15393	CARMIL1;PSRC1
positive regulation of RNA splicing (GO:0033120)	1/23	0.280446	0.490378	0.265967	0.458741	-0.907414	1.15366	HSPA1A
chondrocyte differentiation (GO:0002062)	1/29	0.339689	0.520993	0.320625	0.487337	-1.06259	1.14731	WNT10B
activation of JUN kinase activity (GO:0007257)	1/31	0.358336	0.534521	0.337929	0.499191	-1.11788	1.14727	MAP3K20
positive regulation of autophagy (GO:0010508)	2/68	0.25146	0.476929	0.225459	0.438409	-0.830012	1.14581	OPTN;MID2
regulation of myeloid cell differentiation (GO:0045637)	2/66	0.240934	0.472256	0.21604	0.429395	-0.803393	1.14341	LGALS3;MEIS1
negative regulation of smooth muscle cell proliferation (GO:0048662)	1/28	0.330164	0.515275	0.311805	0.481622	-1.02944	1.14079	IL10
cation transmembrane transport (GO:0098655)	1/27	0.320502	0.510057	0.302871	0.474561	-0.990777	1.12737	SLC36A3
regulation of TORC1 signaling (GO:1903432)	1/29	0.339689	0.520993	0.320625	0.487337	-1.04104	1.12404	DYRK3
actin nucleation (GO:0045010)	1/25	0.30076	0.501705	0.284656	0.469068	-0.935393	1.12382	SCIN
negative regulation of microtubule polymerization or depolymerization (GO:0031111)	1/28	0.330164	0.515275	0.311805	0.481622	-1.01121	1.12058	STMN1
positive regulation of interleukin-1 beta production (GO:0032731)	1/32	0.367462	0.542817	0.346416	0.506812	-1.11381	1.11507	INAVA
cardiac muscle cell development (GO:0055013)	1/28	0.330164	0.515275	0.311805	0.481622	-1.00538	1.11413	OBSL1
regulation of neuron death (GO:1901214)	2/73	0.277808	0.490378	0.24912	0.452216	-0.865448	1.10849	ITGAM;KIF14
'de novo' posttranslational protein folding (GO:0051084)	1/31	0.358336	0.534521	0.337929	0.499191	-1.07643	1.10472	HSPA1A
positive regulation of T cell differentiation (GO:0045582)	1/33	0.376458	0.545524	0.354795	0.511697	-1.12677	1.1008	ADAM8
regulation of protein insertion into mitochondrial membrane involved in apoptotic signaling pathway (GO:1900739)	1/31	0.358336	0.534521	0.337929	0.499191	-1.07203	1.10021	GZMB
strand displacement (GO:0000732)	1/27	0.320502	0.510057	0.302871	0.474561	-0.964307	1.09725	BRIP1
bone development (GO:0060348)	1/35	0.39407	0.559338	0.371233	0.521671	-1.17264	1.09199	SH3PXD2B
activation of adenylate cyclase activity (GO:0007190)	1/33	0.376458	0.545524	0.354795	0.511697	-1.11581	1.09008	ADCY4
protein K11-linked ubiquitination (GO:0070979)	1/29	0.339689	0.520993	0.320625	0.487337	-1.00905	1.0895	UBE2C
JNK cascade (GO:0007254)	2/67	0.246195	0.474968	0.220745	0.435486	-0.775173	1.08651	MAP3K20;DUSP9
negative regulation of endocytosis (GO:0045806)	1/29	0.339689	0.520993	0.320625	0.487337	-1.00558	1.08575	LGALS3
regulation of cell-cell adhesion (GO:0022407)	1/33	0.376458	0.545524	0.354795	0.511697	-1.10996	1.08437	ADAM8
positive regulation of substrate adhesion-dependent cell spreading (GO:1900026)	1/28	0.330164	0.515275	0.311805	0.481622	-0.97536	1.08086	CARMIL1
negative regulation of fat cell differentiation (GO:0045599)	1/33	0.376458	0.545524	0.354795	0.511697	-1.10493	1.07946	WNT10B
positive regulation of tumor necrosis factor superfamily cytokine production (GO:1903557)	1/33	0.376458	0.545524	0.354795	0.511697	-1.10261	1.07719	ADAM8
positive regulation of plasma membrane bounded cell projection assembly (GO:0120034)	2/70	0.261998	0.4826	0.234907	0.445164	-0.796823	1.06728	ANLN;FSCN1
microtubule bundle formation (GO:0001578)	1/33	0.376458	0.545524	0.354795	0.511697	-1.08959	1.06448	PSRC1
signal transduction in response to DNA damage (GO:0042770)	1/26	0.310701	0.504476	0.293822	0.469068	-0.906354	1.05946	E2F7
determination of bilateral symmetry (GO:0009855)	1/30	0.349079	0.528477	0.329333	0.494487	-1.00338	1.05601	STIL
regulation of protein targeting to membrane (GO:0090313)	1/28	0.330164	0.515275	0.311805	0.481622	-0.952741	1.05579	ITGAM
fibroblast growth factor receptor signaling pathway (GO:0008543)	2/79	0.309336	0.504476	0.277603	0.469068	-0.896181	1.05151	FGF16;SHCBP1
regulation of cell differentiation (GO:0045595)	3/122	0.250607	0.476497	0.215203	0.429395	-0.743955	1.02954	LGALS3;SCIN;SNAI2
positive regulation of viral genome replication (GO:0045070)	1/32	0.367462	0.542817	0.346416	0.506812	-1.02542	1.02659	TOP2A
fat-soluble vitamin metabolic process (GO:0006775)	1/27	0.320502	0.510057	0.302871	0.474561	-0.902042	1.0264	CUBN
B cell activation (GO:0042113)	2/74	0.283074	0.491587	0.253864	0.454669	-0.811807	1.02454	IL10;AICDA
regulation of Notch signaling pathway (GO:0008593)	2/71	0.267269	0.487341	0.23964	0.448369	-0.773848	1.02109	CHAC1;FAM129B
regulation of angiogenesis (GO:0045765)	4/178	0.247134	0.474968	0.204569	0.429395	-0.729449	1.01964	STAB1;CCR3;FAM129B;CCR2
purine ribonucleoside triphosphate metabolic process (GO:0009205)	1/33	0.376458	0.545524	0.354795	0.511697	-1.04173	1.01771	HSPA1A
positive regulation of inflammatory response (GO:0050729)	2/74	0.283074	0.491587	0.253864	0.454669	-0.805203	1.0162	ADAM8;CCR2
response to interferon-gamma (GO:0034341)	2/69	0.256728	0.479715	0.23018	0.443752	-0.746065	1.01445	KYNU;AQP4
lymphocyte differentiation (GO:0030098)	2/74	0.283074	0.491587	0.253864	0.454669	-0.802979	1.0134	IL10;AICDA
regulation of DNA recombination (GO:0000018)	1/34	0.385327	0.553113	0.363067	0.516294	-1.06252	1.01329	IL10
negative regulation of signal transduction (GO:0009968)	6/284	0.217804	0.460451	0.168161	0.429395	-0.663982	1.01201	LTK;SOSTDC1;SNAI2;CHAC1;GLIS2;FAM129B
gland development (GO:0048732)	2/76	0.293596	0.501705	0.263359	0.458741	-0.822373	1.00786	COBL;PROX1
connective tissue development (GO:0061448)	1/31	0.358336	0.534521	0.337929	0.499191	-0.979852	1.00561	SH3PXD2B
response to hexose (GO:0009746)	1/28	0.330164	0.515275	0.311805	0.481622	-0.899567	0.996869	KLRG1
response to peptide (GO:1901652)	1/35	0.39407	0.559338	0.371233	0.521671	-1.06876	0.995255	INAVA
regulation of nervous system development (GO:0051960)	1/26	0.310701	0.504476	0.293822	0.469068	-0.847982	0.991226	KIF14
heart looping (GO:0001947)	1/37	0.411187	0.565633	0.387255	0.528959	-1.10931	0.985851	STIL
negative regulation of protein complex assembly (GO:0031333)	1/36	0.40269	0.561113	0.379295	0.525629	-1.07558	0.978333	KIF14
canonical Wnt signaling pathway (GO:0060070)	2/74	0.283074	0.491587	0.253864	0.454669	-0.774281	0.977178	WNT10B;SNAI2
nitrogen compound transport (GO:0071705)	2/75	0.288337	0.497973	0.258611	0.457982	-0.784036	0.975046	CUBN;SLC1A4
regulation of vascular endothelial growth factor production (GO:0010574)	1/28	0.330164	0.515275	0.311805	0.481622	-0.878792	0.973847	CCR2
negative regulation of locomotion (GO:0040013)	1/26	0.310701	0.504476	0.293822	0.469068	-0.828538	0.968497	MID2
regulation of adenylate cyclase activity (GO:0045761)	1/29	0.339689	0.520993	0.320625	0.487337	-0.89312	0.964324	CCR2
regulation of T cell receptor signaling pathway (GO:0050856)	1/27	0.320502	0.510057	0.302871	0.474561	-0.846409	0.9631	LGALS3
regulation of myoblast differentiation (GO:0045661)	1/30	0.349079	0.528477	0.329333	0.494487	-0.914532	0.962505	SOSTDC1
positive regulation of NF-kappaB transcription factor activity (GO:0051092)	3/129	0.277419	0.490378	0.238784	0.447316	-0.745114	0.955406	ADAM8;MID2;HSPA1A
central nervous system neuron differentiation (GO:0021953)	1/33	0.376458	0.545524	0.354795	0.511697	-0.977059	0.954536	PROX1
hemopoiesis (GO:0030097)	2/77	0.298849	0.501705	0.268108	0.461909	-0.786033	0.949383	IL10;RTKN2
skeletal system morphogenesis (GO:0048705)	1/32	0.367462	0.542817	0.346416	0.506812	-0.945406	0.94648	DSCAML1
carbohydrate derivative biosynthetic process (GO:1901137)	1/30	0.349079	0.528477	0.329333	0.494487	-0.898663	0.945803	RRM2
positive regulation of DNA binding (GO:0043388)	1/35	0.39407	0.559338	0.371233	0.521671	-1.00541	0.936263	FAM129B
cellular response to glucagon stimulus (GO:0071377)	1/33	0.376458	0.545524	0.354795	0.511697	-0.956999	0.934939	ADCY4
Golgi organization (GO:0007030)	3/122	0.250607	0.476497	0.215203	0.429395	-0.674762	0.933783	CDK1;OBSL1;OPTN
Rho protein signal transduction (GO:0007266)	2/73	0.277808	0.490378	0.24912	0.452216	-0.728962	0.933673	RHOV;RHOC
positive regulation of adenylate cyclase activity (GO:0045762)	1/34	0.385327	0.553113	0.363067	0.516294	-0.978234	0.932905	ADCY4
regulation of macromolecule metabolic process (GO:0060255)	3/130	0.281274	0.491262	0.242189	0.4496	-0.734783	0.932019	IL10;CDK1;PROX1
hippo signaling (GO:0035329)	1/31	0.358336	0.534521	0.337929	0.499191	-0.907325	0.931173	AMOTL1
negative regulation of mitochondrion organization (GO:0010823)	1/34	0.385327	0.553113	0.363067	0.516294	-0.973753	0.928632	HSPA1A
chemical synaptic transmission (GO:0007268)	6/290	0.231491	0.466351	0.179371	0.429395	-0.634596	0.928549	NQO1;CACNB4;GAD1;SLC17A7;SLC1A4;AMPH
regulation of vascular smooth muscle cell proliferation (GO:1904705)	1/26	0.310701	0.504476	0.293822	0.469068	-0.790482	0.924012	IL10
positive regulation of cytokine-mediated signaling pathway (GO:0001961)	1/34	0.385327	0.553113	0.363067	0.516294	-0.965474	0.920737	HSPA1A
negative regulation of mitotic cell cycle phase transition (GO:1901991)	2/80	0.314568	0.506971	0.282348	0.469068	-0.795201	0.919692	CDKN1A;E2F7
lung development (GO:0030324)	1/30	0.349079	0.528477	0.329333	0.494487	-0.870969	0.916657	PROX1
amino acid transmembrane transport (GO:0003333)	1/30	0.349079	0.528477	0.329333	0.494487	-0.865633	0.911042	SLC36A3
proton transport (GO:0015992)	1/32	0.367462	0.542817	0.346416	0.506812	-0.909714	0.910748	SLC36A3
negative regulation of cellular metabolic process (GO:0031324)	1/35	0.39407	0.559338	0.371233	0.521671	-0.977431	0.910209	OPTN
negative regulation of transferase activity (GO:0051348)	1/31	0.358336	0.534521	0.337929	0.499191	-0.885595	0.908872	PIF1
protein modification by small protein conjugation (GO:0032446)	8/399	0.208429	0.460451	0.151531	0.423791	-0.578977	0.907927	TOP2A;KBTBD6;UBE2C;BCL11A;CDCA8;BIRC5;LMO7;AURKB
proteasomal protein catabolic process (GO:0010498)	5/238	0.250495	0.476497	0.200889	0.429395	-0.65478	0.906423	UBE2C;KIF14;CDK1;BUB1B;FBXO44
sensory perception of mechanical stimulus (GO:0050954)	2/79	0.309336	0.504476	0.277603	0.469068	-0.766524	0.899382	BIRC5;SNAI2
positive regulation of innate immune response (GO:0045089)	1/39	0.427821	0.577635	0.40287	0.540591	-1.05553	0.896196	ADAM8
striated muscle tissue development (GO:0014706)	1/30	0.349079	0.528477	0.329333	0.494487	-0.842291	0.886475	POPDC2
ventricular cardiac muscle tissue morphogenesis (GO:0055010)	1/35	0.39407	0.559338	0.371233	0.521671	-0.94775	0.882569	PROX1
positive regulation of phosphate metabolic process (GO:0045937)	1/29	0.339689	0.520993	0.320625	0.487337	-0.81405	0.87895	DSCAM
protein catabolic process (GO:0030163)	2/82	0.325005	0.515071	0.29183	0.469068	-0.779512	0.876104	BACE2;FBXO44
epithelial cell migration (GO:0010631)	1/37	0.411187	0.565633	0.387255	0.528959	-0.985555	0.87587	ANLN
regulation of protein processing (GO:0070613)	3/129	0.277419	0.490378	0.238784	0.447316	-0.680453	0.872496	IGKC;ADAM8;CHAC1
smoothened signaling pathway (GO:0007224)	1/31	0.358336	0.534521	0.337929	0.499191	-0.844572	0.866771	STIL
positive regulation of cytokine secretion (GO:0050715)	2/74	0.283074	0.491587	0.253864	0.454669	-0.686284	0.866122	IL10;HAVCR2
positive regulation of smooth muscle cell proliferation (GO:0048661)	1/38	0.419563	0.570531	0.395112	0.534419	-0.994324	0.863611	IL10
negative regulation of neuron death (GO:1901215)	2/84	0.335401	0.520993	0.301297	0.474561	-0.788065	0.860904	KIF14;ADAM8
sensory perception of sound (GO:0007605)	2/82	0.325005	0.515071	0.29183	0.469068	-0.765462	0.860313	BIRC5;SNAI2
entry into host cell (GO:0030260)	1/34	0.385327	0.553113	0.363067	0.516294	-0.896906	0.855346	CCR5
erythrocyte differentiation (GO:0030218)	1/36	0.40269	0.561113	0.379295	0.525629	-0.939473	0.854535	DYRK3
positive regulation of ubiquitin-protein transferase activity (GO:0051443)	1/32	0.367462	0.542817	0.346416	0.506812	-0.851306	0.852273	UBE2C
proteasome-mediated ubiquitin-dependent protein catabolic process (GO:0043161)	6/292	0.236114	0.468991	0.183174	0.429395	-0.588301	0.849178	CCNB1;UBE2C;KIF14;CDK1;BUB1B;AURKB
negative regulation of macromolecule metabolic process (GO:0010605)	3/125	0.262055	0.4826	0.22525	0.438409	-0.630429	0.844271	CCR1;OPTN;HAVCR2
regulation of transforming growth factor beta receptor signaling pathway (GO:0017015)	2/80	0.314568	0.506971	0.282348	0.469068	-0.729337	0.843517	CDKN2B;HSPA1A
glycogen metabolic process (GO:0005977)	1/34	0.385327	0.553113	0.363067	0.516294	-0.881953	0.841086	STBD1
regulation of sodium ion transmembrane transporter activity (GO:2000649)	1/38	0.419563	0.570531	0.395112	0.534419	-0.955783	0.830137	SCN4B
cardiac muscle tissue morphogenesis (GO:0055008)	1/37	0.411187	0.565633	0.387255	0.528959	-0.93353	0.829635	PROX1
cellular macromolecule biosynthetic process (GO:0034645)	7/368	0.269515	0.487341	0.205387	0.429395	-0.629455	0.825298	PIF1;BRIP1;CDK1;PCLAF;MCM10;CLSPN;CDC25C
positive regulation of cell motility (GO:2000147)	4/180	0.253314	0.479715	0.209877	0.429395	-0.599639	0.82338	CCR1;CARMIL1;SNAI2;LAMC2
negative regulation of cell cycle (GO:0045786)	2/73	0.277808	0.490378	0.24912	0.452216	-0.639321	0.818858	IL10;CDKN2A
respiratory system development (GO:0060541)	1/30	0.349079	0.528477	0.329333	0.494487	-0.776905	0.817659	PROX1
regulation of sodium ion transmembrane transport (GO:1902305)	1/31	0.358336	0.534521	0.337929	0.499191	-0.792954	0.813796	SCN4B
regulation of substrate adhesion-dependent cell spreading (GO:1900024)	1/42	0.451899	0.591274	0.425554	0.552531	-1.02288	0.812467	CARMIL1
regulation of osteoclast differentiation (GO:0045670)	1/38	0.419563	0.570531	0.395112	0.534419	-0.934696	0.811821	CCR1
negative regulation of G0 to G1 transition (GO:0070317)	1/38	0.419563	0.570531	0.395112	0.534419	-0.934109	0.811311	RRM2
positive regulation of protein catabolic process (GO:0045732)	2/82	0.325005	0.515071	0.29183	0.469068	-0.720049	0.809273	ADAM8;DTL
phosphatidylinositol 3-kinase signaling (GO:0014065)	1/31	0.358336	0.534521	0.337929	0.499191	-0.784232	0.804845	LTK
negative regulation of cytokine-mediated signaling pathway (GO:0001960)	1/41	0.443988	0.583428	0.41809	0.547037	-0.985971	0.800568	PADI2
sodium ion transmembrane transport (GO:0035725)	1/37	0.411187	0.565633	0.387255	0.528959	-0.898752	0.798728	SCN4B
activation of MAPKK activity (GO:0000186)	1/34	0.385327	0.553113	0.363067	0.516294	-0.837444	0.798639	MAP3K20
negative regulation of cell death (GO:0060548)	2/82	0.325005	0.515071	0.29183	0.469068	-0.707824	0.795533	WISP1;HSPA1A
positive regulation of apoptotic process (GO:0043065)	6/308	0.274036	0.490378	0.214702	0.429395	-0.611864	0.792055	TOP2A;WNT10B;SCIN;GZMA;ARHGEF16;MAP3K20
positive regulation of protein secretion (GO:0050714)	2/83	0.330209	0.515275	0.296566	0.471471	-0.710502	0.787257	IL10;ADAM8
generation of neurons (GO:0048699)	3/131	0.285134	0.4946	0.245603	0.4496	-0.626012	0.785517	WNT10B;PROX1;CIT
lymphocyte proliferation (GO:0046651)	1/37	0.411187	0.565633	0.387255	0.528959	-0.880591	0.782588	IL10
sensory organ development (GO:0007423)	1/41	0.443988	0.583428	0.41809	0.547037	-0.963359	0.782208	SH3PXD2B
protein acetylation (GO:0006473)	1/34	0.385327	0.553113	0.363067	0.516294	-0.810722	0.773155	ESCO2
regulation of signal transduction by p53 class mediator (GO:1901796)	3/139	0.316137	0.508961	0.273158	0.467548	-0.67088	0.772571	TPX2;BRIP1;AURKB
regulation of filopodium assembly (GO:0051489)	1/37	0.411187	0.565633	0.387255	0.528959	-0.866268	0.769859	FSCN1
positive regulation of NIK/NF-kappaB signaling (GO:1901224)	1/36	0.40269	0.561113	0.379295	0.525629	-0.845309	0.768884	TNFSF15
positive regulation of neuron death (GO:1901216)	1/39	0.427821	0.577635	0.40287	0.540591	-0.904968	0.768363	ITGAM
regulation of sodium ion transport (GO:0002028)	1/36	0.40269	0.561113	0.379295	0.525629	-0.841658	0.765563	SCN4B
skeletal muscle organ development (GO:0060538)	1/30	0.349079	0.528477	0.329333	0.494487	-0.715611	0.753149	POPDC2
positive regulation of protein insertion into mitochondrial membrane involved in apoptotic signaling pathway (GO:1900740)	1/31	0.358336	0.534521	0.337929	0.499191	-0.727678	0.746804	GZMB
nucleotide-binding oligomerization domain containing signaling pathway (GO:0070423)	1/29	0.339689	0.520993	0.320625	0.487337	-0.691527	0.746659	INAVA
regulation of interleukin-12 production (GO:0032655)	1/34	0.385327	0.553113	0.363067	0.516294	-0.780873	0.74469	IL10
actin polymerization or depolymerization (GO:0008154)	1/37	0.411187	0.565633	0.387255	0.528959	-0.837918	0.744664	COBL
negative regulation of DNA binding (GO:0043392)	1/35	0.39407	0.559338	0.371233	0.521671	-0.797351	0.742514	GZMA
calcium ion homeostasis (GO:0055074)	2/88	0.356045	0.534521	0.320161	0.487337	-0.716397	0.739823	CCR1;CCR2
positive regulation of stress fiber assembly (GO:0051496)	1/38	0.419563	0.570531	0.395112	0.534419	-0.847697	0.736259	CARMIL1
regulation of erythrocyte differentiation (GO:0045646)	1/33	0.376458	0.545524	0.354795	0.511697	-0.753484	0.736114	HSPA1A
regulation of dendrite development (GO:0050773)	1/38	0.419563	0.570531	0.395112	0.534419	-0.84173	0.731077	COBL
embryonic limb morphogenesis (GO:0030326)	1/35	0.39407	0.559338	0.371233	0.521671	-0.780733	0.727039	MAP3K20
positive regulation of DNA replication (GO:0045740)	1/36	0.40269	0.561113	0.379295	0.525629	-0.798801	0.726581	AREG
mRNA catabolic process (GO:0006402)	1/37	0.411187	0.565633	0.387255	0.528959	-0.81537	0.724626	HSPA1A
regulation of ion transmembrane transporter activity (GO:0032412)	1/43	0.459699	0.597527	0.432923	0.559239	-0.931158	0.723681	SCN4B
cellular response to radiation (GO:0071478)	1/43	0.459699	0.597527	0.432923	0.559239	-0.928759	0.721817	CDKN1A
positive regulation of transferase activity (GO:0051347)	3/138	0.312254	0.505381	0.269693	0.463592	-0.618696	0.720124	LTK;NEK2;AURKB
positive regulation of mitochondrial outer membrane permeabilization involved in apoptotic signaling pathway (GO:1901030)	1/38	0.419563	0.570531	0.395112	0.534419	-0.8276	0.718804	GZMB
regulation of G0 to G1 transition (GO:0070316)	1/40	0.435962	0.582941	0.410529	0.545581	-0.863704	0.717047	RRM2
positive regulation of RNA metabolic process (GO:0051254)	1/36	0.40269	0.561113	0.379295	0.525629	-0.78712	0.715956	HSPA1A
positive regulation of response to external stimulus (GO:0032103)	2/91	0.371377	0.545524	0.334231	0.499191	-0.721545	0.714718	OPTN;CCR2
positive regulation of protein localization to nucleus (GO:1900182)	1/43	0.459699	0.597527	0.432923	0.559239	-0.916646	0.712403	CDK1
establishment of protein localization to membrane (GO:0090150)	2/84	0.335401	0.520993	0.301297	0.474561	-0.650668	0.710809	RAB26;OPTN
regulation of B cell proliferation (GO:0030888)	1/44	0.467387	0.601717	0.440199	0.563854	-0.931725	0.708667	IL10
negative regulation of cell-substrate adhesion (GO:0010812)	1/36	0.40269	0.561113	0.379295	0.525629	-0.775312	0.705216	CDKN2A
positive regulation of intracellular transport (GO:0032388)	1/45	0.474967	0.605335	0.447381	0.567801	-0.946966	0.705026	SPAG5
ventricular septum development (GO:0003281)	1/29	0.339689	0.520993	0.320625	0.487337	-0.652191	0.704187	PROX1
retina homeostasis (GO:0001895)	1/39	0.427821	0.577635	0.40287	0.540591	-0.827737	0.702789	IGKC
apical junction assembly (GO:0043297)	1/36	0.40269	0.561113	0.379295	0.525629	-0.77211	0.702302	RHOC
positive regulation of peptide secretion (GO:0002793)	1/36	0.40269	0.561113	0.379295	0.525629	-0.764616	0.695486	ADAM8
negative regulation of cytokine secretion (GO:0050710)	1/41	0.443988	0.583428	0.41809	0.547037	-0.851519	0.691398	IL10
muscle cell differentiation (GO:0042692)	1/37	0.411187	0.565633	0.387255	0.528959	-0.776644	0.69021	POPDC2
cation transport (GO:0006812)	2/80	0.314568	0.506971	0.282348	0.469068	-0.595351	0.688555	SLC36A3;SLC1A4
positive regulation of transmembrane receptor protein serine/threonine kinase signaling pathway (GO:0090100)	2/83	0.330209	0.515275	0.296566	0.471471	-0.620347	0.687364	CDKN2B;TTK
regulation of smoothened signaling pathway (GO:0008589)	1/37	0.411187	0.565633	0.387255	0.528959	-0.770808	0.685023	GLIS2
positive regulation of cell-cell adhesion (GO:0022409)	1/34	0.385327	0.553113	0.363067	0.516294	-0.710681	0.67775	IL10
purine ribonucleoside monophosphate metabolic process (GO:0009167)	1/40	0.435962	0.582941	0.410529	0.545581	-0.815589	0.677102	HSPA1A
positive regulation of myeloid leukocyte differentiation (GO:0002763)	1/33	0.376458	0.545524	0.354795	0.511697	-0.692867	0.676895	CCR1
adenylate cyclase-modulating G-protein coupled receptor signaling pathway (GO:0007188)	3/135	0.300615	0.501705	0.25933	0.458723	-0.560765	0.673999	CYSLTR1;ADCY4;CCR3
positive regulation of protein localization to plasma membrane (GO:1903078)	1/44	0.467387	0.601717	0.440199	0.563854	-0.882267	0.67105	ARHGEF16
regulation of cell death (GO:0010941)	2/97	0.401585	0.561113	0.362103	0.516294	-0.733299	0.669015	WISP1;HSPA1A
negative regulation of catabolic process (GO:0009895)	1/41	0.443988	0.583428	0.41809	0.547037	-0.821887	0.667338	ACTN3
skeletal muscle tissue development (GO:0007519)	1/40	0.435962	0.582941	0.410529	0.545581	-0.798636	0.663027	POPDC2
protein monoubiquitination (GO:0006513)	1/38	0.419563	0.570531	0.395112	0.534419	-0.759068	0.659281	DTL
positive regulation of interleukin-6 production (GO:0032755)	1/44	0.467387	0.601717	0.440199	0.563854	-0.864585	0.6576	INAVA
determination of left/right symmetry (GO:0007368)	1/43	0.459699	0.597527	0.432923	0.559239	-0.843337	0.655429	STIL
negative regulation of signaling (GO:0023057)	2/84	0.335401	0.520993	0.301297	0.474561	-0.596585	0.651726	LTK;OPTN
cell-cell junction assembly (GO:0007043)	2/80	0.314568	0.506971	0.282348	0.469068	-0.559782	0.647418	FSCN1;RHOC
sarcomere organization (GO:0045214)	1/32	0.367462	0.542817	0.346416	0.506812	-0.643382	0.644113	OBSL1
regulation of cytokine secretion (GO:0050707)	1/32	0.367462	0.542817	0.346416	0.506812	-0.642882	0.643612	IL10
cellular response to acid chemical (GO:0071229)	2/92	0.376456	0.545524	0.338903	0.49966	-0.655273	0.640172	WNT10B;LTK
embryonic heart tube morphogenesis (GO:0003143)	1/41	0.443988	0.583428	0.41809	0.547037	-0.787315	0.639267	STIL
positive regulation of gene expression, epigenetic (GO:0045815)	1/48	0.497068	0.625941	0.468383	0.58519	-0.910382	0.636383	PADI2
cell-cell adhesion via plasma-membrane adhesion molecules (GO:0098742)	3/143	0.331675	0.517033	0.287063	0.469068	-0.575864	0.635523	ITGAM;DSCAM;DSCAML1
regulation of neuron apoptotic process (GO:0043523)	2/90	0.366282	0.542817	0.32955	0.494487	-0.627473	0.630204	KIF14;ADAM8
negative regulation of type I interferon production (GO:0032480)	1/45	0.474967	0.605335	0.447381	0.567801	-0.838878	0.624553	HAVCR2
cell-matrix adhesion (GO:0007160)	2/91	0.371377	0.545524	0.334231	0.499191	-0.630103	0.624141	ACTN3;MADCAM1
protein kinase B signaling (GO:0043491)	1/36	0.40269	0.561113	0.379295	0.525629	-0.682856	0.621118	CDKN1A
negative regulation of NF-kappaB transcription factor activity (GO:0032088)	2/83	0.330209	0.515275	0.296566	0.471471	-0.557502	0.617729	CDKN2A;HAVCR2
muscle contraction (GO:0006936)	3/138	0.312254	0.505381	0.269693	0.463592	-0.528705	0.615379	MYL4;ACTN3;OBSL1
signal transduction by p53 class mediator (GO:0072331)	1/40	0.435962	0.582941	0.410529	0.545581	-0.740723	0.614948	E2F7
response to glucagon (GO:0033762)	1/35	0.39407	0.559338	0.371233	0.521671	-0.653346	0.608412	ADCY4
sulfur compound catabolic process (GO:0044273)	1/36	0.40269	0.561113	0.379295	0.525629	-0.663293	0.603324	CHAC1
membrane protein proteolysis (GO:0033619)	1/36	0.40269	0.561113	0.379295	0.525629	-0.662396	0.602508	BACE2
regulation of cellular localization (GO:0060341)	1/41	0.443988	0.583428	0.41809	0.547037	-0.740471	0.601232	SPAG5
base-excision repair (GO:0006284)	1/38	0.419563	0.570531	0.395112	0.534419	-0.689181	0.598582	NEIL3
regulation of plasma membrane bounded cell projection assembly (GO:0120032)	1/40	0.435962	0.582941	0.410529	0.545581	-0.720658	0.59829	FSCN1
ameboidal-type cell migration (GO:0001667)	1/41	0.443988	0.583428	0.41809	0.547037	-0.722164	0.586367	AMOTL1
cellular response to interleukin-12 (GO:0071349)	1/47	0.489806	0.620611	0.461472	0.579886	-0.816646	0.582878	IL10
positive regulation of macroautophagy (GO:0016239)	1/45	0.474967	0.605335	0.447381	0.567801	-0.782418	0.582518	OPTN
amide biosynthetic process (GO:0043604)	1/45	0.474967	0.605335	0.447381	0.567801	-0.775269	0.577195	PCSK1
negative regulation of protein catabolic process (GO:0042177)	1/40	0.435962	0.582941	0.410529	0.545581	-0.686259	0.569732	IL10
positive regulation of ATPase activity (GO:0032781)	1/36	0.40269	0.561113	0.379295	0.525629	-0.62583	0.569248	MYL4
negative regulation of Ras protein signal transduction (GO:0046580)	1/38	0.419563	0.570531	0.395112	0.534419	-0.652837	0.567015	STMN1
eye development (GO:0001654)	1/44	0.467387	0.601717	0.440199	0.563854	-0.740035	0.562868	SH3PXD2B
protein complex subunit organization (GO:0071822)	1/46	0.482439	0.613831	0.454472	0.574407	-0.771672	0.562472	NUF2
regulation of cellular amine metabolic process (GO:0033238)	1/52	0.525099	0.648602	0.495155	0.607672	-0.871984	0.561704	NQO1
DNA duplex unwinding (GO:0032508)	1/42	0.451899	0.591274	0.425554	0.552531	-0.70602	0.560789	PIF1
regulation of organelle assembly (GO:1902115)	1/48	0.497068	0.625941	0.468383	0.58519	-0.791109	0.553008	STIL
positive regulation of interleukin-8 production (GO:0032757)	1/45	0.474967	0.605335	0.447381	0.567801	-0.742484	0.552786	HSPA1A
peptide transport (GO:0015833)	1/42	0.451899	0.591274	0.425554	0.552531	-0.689847	0.547943	CENPF
cellular response to fibroblast growth factor stimulus (GO:0044344)	2/95	0.391588	0.559338	0.352857	0.511697	-0.584336	0.547841	FGF16;SHCBP1
monovalent inorganic cation transport (GO:0015672)	2/105	0.44076	0.583428	0.398564	0.536704	-0.665699	0.545376	SLC36A3;SCN4B
carboxylic acid transmembrane transport (GO:1905039)	1/36	0.40269	0.561113	0.379295	0.525629	-0.597351	0.543344	SLC36A3
neural crest cell development (GO:0014032)	1/36	0.40269	0.561113	0.379295	0.525629	-0.59646	0.542533	SNAI2
cardiac ventricle morphogenesis (GO:0003208)	1/44	0.467387	0.601717	0.440199	0.563854	-0.710906	0.540713	PROX1
pattern recognition receptor signaling pathway (GO:0002221)	1/49	0.504226	0.632252	0.475205	0.591289	-0.788359	0.539813	INAVA
[truncated: 390 more rows]

## Sheet: Dnreg 4C12vIso-Molec
Supplemental Table 6. GO Molecular Function Analysis of downregulated genes in 4C12 versus Isotype Control treated Treg. 51 downregulated genes (adjusted p<0.05 and fold decrease >1.5) were analyzed using the Enrichr analysis tool [27,28].
[truncated: 74 more rows]

[truncated: 3 more sheets: Dnreg 4C12vIso-Biol, Dnreg TL1A_IL2vIso-Molec, Dnreg TL1A_IL2vIso-Biol]
